# Supplementary material for: Bioactivity of dihydropyrimidinone derivatives as inhibitors of cyclooxygenase-2 (COX-2): an in silico approach
Source: Royal Society of Chemistry journal article supplement (doi:10.1039/d3ra05942a), 2023-01-01
Supplement: d3ra05942a2.pdf [file d3ra05942a2.pdf]

## Supplementary Materials

### Bioactivity of dihydropyrimidinone derivatives as inhibitors of cyclooxygenase-2 (COX-2): an in silico approach

Kautsar Ul Haq<sup>a,b</sup>, Nur Lailatus Sa'adah<sup>b</sup>, Imam Siswanto<sup>a,b</sup>, and Hery Suwito<sup>b\*</sup>

<sup>a</sup> Bioinformatic Division, University CoE-Research Center for Bio-Molecule Engineering (BIOME), Airlangga University, Surabaya 60115, Indonesia

<sup>b</sup> Department of Chemistry, Faculty of Science and Technology, Airlangga University, Surabaya 60115, Indonesia

**Table S1.** List of designed candidates with DHPM core

| Code | Structure                                                               | Code | Structure                                                           |
|------|-------------------------------------------------------------------------|------|---------------------------------------------------------------------|
| DB01 |                                                                         | DU13 |                                                                     |
|      | <chem>O=C(O)CC1=C(C(C2=CC=CC=C2)N3C4=C(C=CC=C4)SC3=N1)C(OC)=O</chem>    |      | <chem>O=C(O)CC1=C(C(C2=C(OC)C=C(OC)C=C2OC)NC(N1)=O)C(OC)=O</chem>   |
| DB02 |                                                                         | DU14 |                                                                     |
|      | <chem>O=C(O)CC1=C(C(C2=C(O)C=CC=C2)N3C4=C(C=CC=C4)SC3=N1)C(OC)=O</chem> |      | <chem>O=C(O)CC1=C(C(C2=CC(OC)=C(OC)C(OC)=C2)NC(N1)=O)C(OC)=O</chem> |
| DB03 |                                                                         | DU15 |                                                                     |
|      | <chem>O=C(O)CC1=C(C(C2=CC(O)=CC=C2)N3C4=C(C=CC=C4)SC3=N1)C(OC)=O</chem> |      | <chem>O=C(O)CC1=C(C(C2=CC=C(Cl)C=C2)NC(N1)=O)C(OC)=O</chem>         |

|      |                                                                                     |      |                                                                                       |
|------|-------------------------------------------------------------------------------------|------|---------------------------------------------------------------------------------------|
| DB04 | 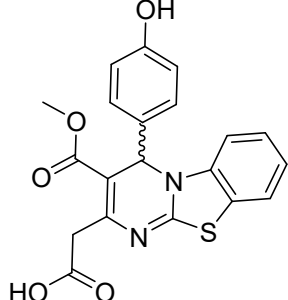   | DU16 |    |
|      | <chem>O=C(O)CC1=C(C(C2=CC=C(O)C=C2)N3C4=C(C=CC=C4)SC3=N1)C(OC)=O</chem>             |      | <chem>O=C(O)CC1=C(C(C2=C(C(Cl)C=CC(Cl)=C2)NC(N1)=O)C(OC)=O</chem>                     |
| DB05 |    | DU17 |    |
|      | <chem>O=C(O)CC1=C(C(C2=C(O)C=C(O)C=C2)N3C4=C(C=CC=C4)SC3=N1)C(OC)=O</chem>          |      | <chem>O=C(O)CC1=C(C(C2=CC=C(F)C=C2)NC(N1)=O)C(OC)=O</chem>                            |
| DB06 |   | DU18 |   |
|      | <chem>O=C(O)CC1=C(C(C2=CC(O)=C(O)C=C2)N3C4=C(C=CC=C4)SC3=N1)C(OC)=O</chem>          |      | <chem>O=C(O)CC1=C(C(C2=CC=C(C(F)(F)F)C=C2)NC(N1)=O)C(OC)=O</chem>                     |
| DB07 |  | DU19 |  |
|      | <chem>O=C(O)CC1=C(C(C2=CC(OC)=C(O)C=C2)N3C4=C(C=CC=C4)SC3=N1)C(OC)=O</chem>         |      | <chem>O=C(O)CC1=C(C(C2=CC=C(N(C)C)C=C2)NC(N1)=O)C(OC)=O</chem>                        |

|      |                                                                                     |      |                                                                                       |
|------|-------------------------------------------------------------------------------------|------|---------------------------------------------------------------------------------------|
| DB08 | 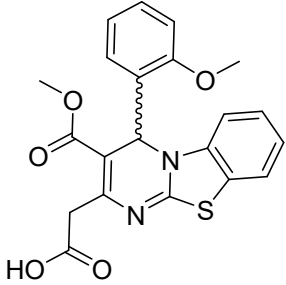   | DU20 |    |
|      | <chem>O=C(O)CC1=C(C(C2=C(OC)C=CC=C2)N3C4=C(C=CC=C4)SC3=N1)C(OC)=O</chem>            |      | <chem>O=C(O)CC1=C(C(C2=CC=C(Br)C=C2)NC(N1)=O)C(OC)=O</chem>                           |
| DB09 |    | DU21 |    |
|      | <chem>O=C(O)CC1=C(C(C2=C(OC)C(OC)=CC=C2)N3C4=C(C=CC=C4)SC3=N1)C(OC)=O</chem>        |      | <chem>O=C(O)CC1=C(C(C2=NC=CC=C2)NC(N1)=O)C(OC)=O</chem>                               |
| DB10 |   | DU22 |   |
|      | <chem>O=C(O)CC1=C(C(C2=C(OC)C=C(OC)C=C2)N3C4=C(C=CC=C4)SC3=N1)C(OC)=O</chem>        |      | <chem>O=C(O)CC1=C(C(C2=CC=CS2)NC(N1)=O)C(OC)=O</chem>                                 |
| DB11 |  | DU23 |  |
|      | <chem>O=C(O)CC1=C(C(C2=C(OC)C=CC(OC)=C2)N3C4=C(C=CC=C4)SC3=N1)C(OC)=O</chem>        |      | <chem>O=C(O)CC1=C(C(C2=CNC3=C2C=CC=C3)NC(N1)=O)C(OC)=O</chem>                         |

|      |                                                                                     |      |                                                                                       |
|------|-------------------------------------------------------------------------------------|------|---------------------------------------------------------------------------------------|
| DB12 | 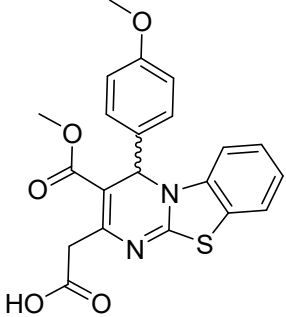   | DU24 |    |
|      | <chem>O=C(O)CC1=C(C(C2=CC=C(OC)C=C2)N3C4=C(C=CC=C4)SC3=N1)C(OC)=O</chem>            |      | <chem>O=C(O)CC1=C(C(C=C/C2=CC=CC=C2)NC(N1)=O)C(OC)=O</chem>                           |
| DB13 |    | DU25 |    |
|      | <chem>O=C(O)CC1=C(C(C2=C(OC)C=C(OC)C=C2OC)N3C4=C(C=CC=C4)SC3=N1)C(OC)=O</chem>      |      | <chem>O=C(O)CC1=C(C(C=C/C2=CC=C(OC)C=C2)NC(N1)=O)C(OC)=O</chem>                       |
| DB14 |  | DU26 |  |
|      | <chem>O=C(O)CC1=C(C(C2=CC(OC)C=C(OC)C(OC)=C2)N3C4=C(C=CC=C4)SC3=N1)C(OC)=O</chem>   |      | <chem>O=C(O)CC1=C(C(C=C/C2=CC=C(F)C=C2)NC(N1)=O)C(OC)=O</chem>                        |
| DB15 |  | DU27 |  |
|      | <chem>O=C(O)CC1=C(C(C2=CC=C(Cl)C=C2)N3C4=C(C=CC=C4)SC3=N1)C(OC)=O</chem>            |      | <chem>O=C(O)CC1=C(C(C=C/C2=CC=C(Br)C=C2)NC(N1)=O)C(OC)=O</chem>                       |

|      |                                                                                     |      |                                                                                       |
|------|-------------------------------------------------------------------------------------|------|---------------------------------------------------------------------------------------|
| DB16 | 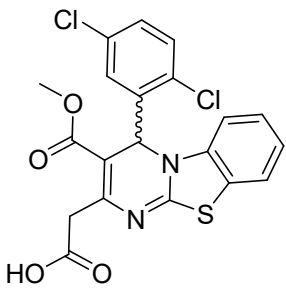   | DU28 |    |
|      | <chem>O=C(O)CC1=C(C(C2=C(Cl)C=CC(Cl)=C2)N3C4=C(C=CC=C4)SC3=N1)C(OC)=O</chem>        |      | <chem>O=C(O)CC1=C(C(C(/C=C/C2=C([N+][[O-]])=O)C=CC=C2)NC(N1)=O)C(OC)=O</chem>         |
| DB17 |    | DU29 |    |
|      | <chem>O=C(O)CC1=C(C(C2=CC=C(F)C=C2)N3C4=C(C=CC=C4)SC3=N1)C(OC)=O</chem>             |      | <chem>O=C(O)CC1=C(C(C(/C(Br)=C/C2=CC=CC=C2)NC(N1)=O)C(OC)=O</chem>                    |
| DB18 |   | DU30 |   |
|      | <chem>O=C(O)CC1=C(C(C2=CC=C(C(F)(F)F)C=C2)N3C4=C(C=CC=C4)SC3=N1)C(OC)=O</chem>      |      | <chem>O=C(O)CC1=C(C(C(/C(OC)=C/C2=CC=CC=C2)NC(N1)=O)C(OC)=O</chem>                    |
| DB19 |  | DZ01 |  |
|      | <chem>O=C(O)CC1=C(C(C2=CC=C(N(C)C)C=C2)N3C4=C(C=CC=C4)SC3=N1)C(OC)=O</chem>         |      | <chem>O=C(OC)C1=C(CC(O)=O)NC2=NN=NN2C1C3=CC=CC=C3</chem>                              |

|      |                                                                                     |      |                                                                                       |
|------|-------------------------------------------------------------------------------------|------|---------------------------------------------------------------------------------------|
| DB20 | 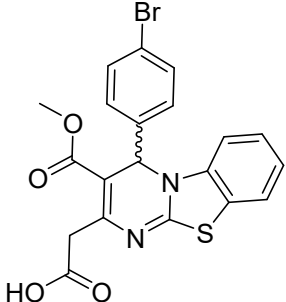   | DZ02 |    |
|      | <chem>O=C(O)CC1=C(C(C2=CC=C(Br)C=C2)N3C4=C(C=CC=C4)SC3=N1)C(OC)=O</chem>            |      | <chem>O=C(OC)C1=C(CC(O)=O)NC2=NN=NN2C1C3=C(O)C=C(C=C3)</chem>                         |
| DB21 |    | DZ03 |    |
|      | <chem>O=C(O)CC1=C(C(C2=NC=CC=C2)N3C4=C(C=CC=C4)SC3=N1)C(OC)=O</chem>                |      | <chem>O=C(OC)C1=C(CC(O)=O)NC2=NN=NN2C1C3=CC(O)=C(C=C3)</chem>                         |
| DB22 |   | DZ04 |   |
|      | <chem>O=C(O)CC1=C(C(C2=CC=CS2)N3C4=C(C=CC=C4)SC3=N1)C(OC)=O</chem>                  |      | <chem>O=C(OC)C1=C(CC(O)=O)NC2=NN=NN2C1C3=CC=C(O)C=C3</chem>                           |
| DB23 |  | DZ05 |  |
|      | <chem>O=C(O)CC1=C(C(C2=CNC3=C2C=CC=C3)N4C5=C(C=CC=C5)SC4=N1)C(OC)=O</chem>          |      | <chem>O=C(OC)C1=C(CC(O)=O)NC2=NN=NN2C1C3=C(O)C=C(O)C=C3</chem>                        |

|      |                                                                                     |      |                                                                                       |
|------|-------------------------------------------------------------------------------------|------|---------------------------------------------------------------------------------------|
| DB24 | 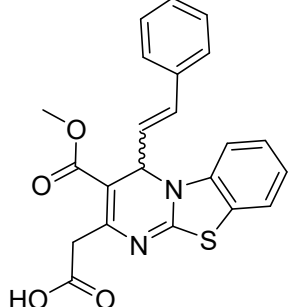   | DZ06 |    |
|      | <chem>O=C(O)CC1=C(C/C=C/C2=CC=CC=C2)N3C4=C(C=CC=C4)SC3=N1C(OC)=O</chem>             |      | <chem>O=C(OC)C1=C(CC(O)=O)NC2=NN=NN2C1C3=CC(O)=C(O)C=C3</chem>                        |
| DB25 |    | DZ07 |    |
|      | <chem>O=C(O)CC1=C(C/C=C/C2=CC=C(OC)C=C2)N3C4=C(C=CC=C4)SC3=N1C(OC)=O</chem>         |      | <chem>O=C(OC)C1=C(CC(O)=O)NC2=NN=NN2C1C3=CC(OC)=C(O)C=C3</chem>                       |
| DB26 |  | DZ08 |  |
|      | <chem>O=C(O)CC1=C(C/C=C/C2=CC=C(F)C=C2)N3C4=C(C=CC=C4)SC3=N1C(OC)=O</chem>          |      | <chem>O=C(OC)C1=C(CC(O)=O)NC2=NN=NN2C1C3=C(OC)C=CC=C3</chem>                          |
| DB27 |  | DZ09 |  |
|      | <chem>O=C(O)CC1=C(C/C=C/C2=CC=C(Br)C=C2)N3C4=C(C=CC=C4)SC3=N1C(OC)=O</chem>         |      | <chem>O=C(OC)C1=C(CC(O)=O)NC2=NN=NN2C1C3=C(OC)C(OC)=CC=C3</chem>                      |

|      |                                                                                          |      |                                                                                       |
|------|------------------------------------------------------------------------------------------|------|---------------------------------------------------------------------------------------|
| DB28 | 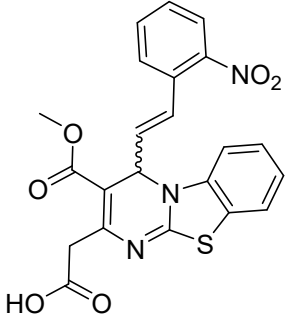        | DZ10 |    |
|      | <chem>O=C(O)CC1=C(C(/C=C/C2=C([N+]]([O-])=O)C=CC=C2)N3C4=C(C=CC=C4)SC3=N1)C(OC)=O</chem> |      | <chem>O=C(OC)C1=C(CC(O)=O)NC2=NN=NN2C1C3=C(OC)C=C(OC)C=C3</chem>                      |
| DB29 |         | DZ11 |    |
|      | <chem>O=C(O)CC1=C(C(C(Br)=C/C2=CC=CC=C2)N3C4=C(C=CC=C4)SC3=N1)C(OC)=O</chem>             |      | <chem>O=C(OC)C1=C(CC(O)=O)NC2=NN=NN2C1C3=C(OC)C=CC(OC)=C3</chem>                      |
| DB30 |        | DZ12 |   |
|      | <chem>O=C(O)CC1=C(C(C(OC)=C/C2=CC=CC=C2)N3C4=C(C=CC=C4)SC3=N1)C(OC)=O</chem>             |      | <chem>O=C(OC)C1=C(CC(O)=O)NC2=NN=NN2C1C3=CC=C(OC)C=C3</chem>                          |
| DT01 |       | DZ13 |  |
|      | <chem>O=C(O)CC1=C(C(C2=CC=CC=C2)NC(N1)=S)C(OC)=O</chem>                                  |      | <chem>O=C(O)CC1=C(C(C2=C(OC)C=C(OC)C=C2OC)N3C(N1)=NN=N3)C(OC)=O</chem>                |



|      |                                                                                     |      |                                                                                       |
|------|-------------------------------------------------------------------------------------|------|---------------------------------------------------------------------------------------|
| DT02 | 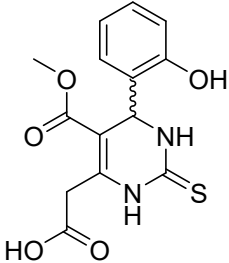   | DZ14 |    |
|      | <chem>O=C(O)CC1=C(C(C2=C(O)C=CC=C2)NC(N1)=S)C(OC)=O</chem>                          |      | <chem>O=C(OC)C1=C(CC(O)=O)NC2=NN=NN2C1C3=CC(OC)=C(OC)C(OC)=C3</chem>                  |
| DT03 |    | DZ15 |    |
|      | <chem>O=C(O)CC1=C(C(C2=CC(O)=CC=C2)NC(N1)=S)C(OC)=O</chem>                          |      | <chem>O=C(OC)C1=C(CC(O)=O)NC2=NN=NN2C1C3=CC=C(Cl)C=C3</chem>                          |
| DT04 |   | DZ16 |   |
|      | <chem>O=C(O)CC1=C(C(C2=CC=C(O)C=C2)NC(N1)=S)C(OC)=O</chem>                          |      | <chem>O=C(OC)C1=C(CC(O)=O)NC2=NN=NN2C1C3=C(Cl)C=C(Cl)C=C3</chem>                      |
| DT05 |  | DZ17 |  |
|      | <chem>O=C(O)CC1=C(C(C2=CC=C(O)C=C2)NC(N1)=S)C(OC)=O</chem>                          |      | <chem>O=C(OC)C1=C(CC(O)=O)NC2=NN=NN2C1C3=CC=C(F)C=C3</chem>                           |

|      |                                                                                     |      |                                                                                       |
|------|-------------------------------------------------------------------------------------|------|---------------------------------------------------------------------------------------|
| DT06 | 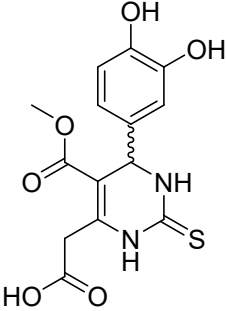   | DZ18 |    |
|      | <chem>O=C(O)CC1=C(C(C2=CC(O)=C(O)C=C2)NC(N1)=S)C(OC)=O</chem>                       |      | <chem>O=C(OC)C1=C(CC(O)=O)NC2=NN=NN2C1C3=CC=C(C(F)(F)F)C=C3</chem>                    |
| DT07 |    | DZ19 |    |
|      | <chem>O=C(O)CC1=C(C(C2=CC(OC)=C(O)C=C2)NC(N1)=S)C(OC)=O</chem>                      |      | <chem>O=C(OC)C1=C(CC(O)=O)NC2=NN=NN2C1C3=CC=C(N(C)C)C=C3</chem>                       |
| DT08 |  | DZ20 |   |
|      | <chem>O=C(O)CC1=C(C(C2=C(OC)C=CC=C2)NC(N1)=S)C(OC)=O</chem>                         |      | <chem>O=C(OC)C1=C(CC(O)=O)NC2=NN=NN2C1C3=CC=C(Br)C=C3</chem>                          |
| DT09 |  | DZ21 |  |
|      | <chem>O=C(O)CC1=C(C(C2=C(OC)C(OC)=CC=C2)NC(N1)=S)C(OC)=O</chem>                     |      | <chem>O=C(O)CC1=C(C(C2=NC=CC=C2)N3C(N1)=NN=N3)C(O)=O</chem>                           |

|      |                                                                                     |      |                                                                                       |
|------|-------------------------------------------------------------------------------------|------|---------------------------------------------------------------------------------------|
| DT10 | 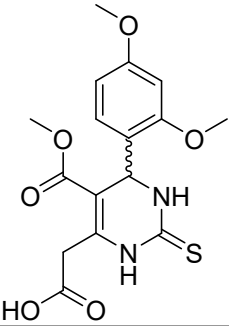   | DZ22 |    |
|      | <chem>O=C(O)CC1=C(C(C2=C(OC)C=C(OC)C=C2)NC(N1)=S)C(OC)=O</chem>                     |      | <chem>O=C(O)CC1=C(C(C2=CC=CS2)N3C(N1)=NN=N3)C(OC)=O</chem>                            |
| DT11 |    | DZ23 |    |
|      | <chem>O=C(O)CC1=C(C(C2=C(OC)C=CC(OC)=C2)NC(N1)=S)C(OC)=O</chem>                     |      | <chem>O=C(O)CC1=C(C(C2=CNC3=C2C=CC=C3)N4C(N1)=NN=N4)C(OC)=O</chem>                    |
| DT12 |   | DZ24 |   |
|      | <chem>O=C(O)CC1=C(C(C2=CC=C(OC)C=C2)NC(N1)=S)C(OC)=O</chem>                         |      | <chem>O=C(O)CC1=C(C(C=C/C2=CC=CC=C2)N3N=NN=C3N1)C(OC)=O</chem>                        |
| DT13 |  | DZ25 |  |
|      | <chem>O=C(O)CC1=C(C(C2=C(OC)C=C(OC)C=C2OC)NC(N1)=S)C(OC)=O</chem>                   |      | <chem>O=C(O)CC1=C(C(C=C/C2=CC=C(OC)C=C2)N3N=NN=C3N1)C(OC)=O</chem>                    |

|      |                                                                                     |      |                                                                                       |
|------|-------------------------------------------------------------------------------------|------|---------------------------------------------------------------------------------------|
| DT14 | 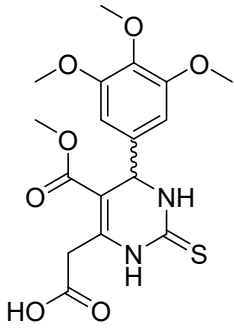   | DZ26 |    |
|      | <chem>O=C(O)CC1=C(C(C2=CC(OC)=C(OC)C(OC)=C2)NC(N1)=S)C(OC)=O</chem>                 |      | <chem>O=C(O)CC1=C(C(/C=C/C2=CC=C(F)C=C2)N3N=NN=C3N1)C(OC)=O</chem>                    |
| DT15 |    | DZ27 |    |
|      | <chem>O=C(O)CC1=C(C(C2=CC=C(Cl)C=C2)NC(N1)=S)C(OC)=O</chem>                         |      | <chem>O=C(O)CC1=C(C(/C=C/C2=CC=C(Br)C=C2)N3N=NN=C3N1)C(OC)=O</chem>                   |
| DT16 |  | DZ28 |  |
|      | <chem>O=C(O)CC1=C(C(C2=C(Cl)C=CC(Cl)=C2)NC(N1)=S)C(OC)=O</chem>                     |      | <chem>O=C(O)CC1=C(C(/C=C/C2=C([N+](O-))=O)C=CC=C2)N3N=NN=C3N1)C(OC)=O</chem>          |
| DT17 |  | DZ29 |  |
|      | <chem>O=C(O)CC1=C(C(C2=CC=C(F)C=C2)NC(N1)=S)C(OC)=O</chem>                          |      | <chem>O=C(O)CC1=C(C(/C(Br)=C/C2=CC=CC=C2)N3N=NN=C3N1)C(OC)=O</chem>                   |

|      |                                                                                     |      |                                                                                       |
|------|-------------------------------------------------------------------------------------|------|---------------------------------------------------------------------------------------|
| DT18 | 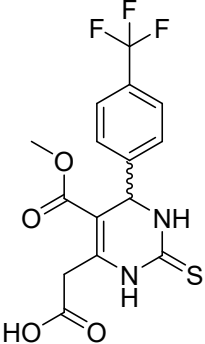   | DZ30 |    |
|      | <chem>O=C(O)CC1=C(C(C2=CC=C(C(F)(F)F)C=C2)NC(N1)=S)C(OC)=O</chem>                   |      | <chem>O=C(O)CC1=C(C(C(OC)=C/C2=CC=CC=C2)N3N=NN=C3N1)C(OC)=O</chem>                    |
| DT19 |    | DBA2 |    |
|      | <chem>O=C(O)CC1=C(C(C2=CC=C(N(C)C)C=C2)NC(N1)=S)C(OC)=O</chem>                      |      | <chem>OC(COC1=C(C(C=CC=C1)C2C(C(C)=O)=C(N=C3N2C4=C(S3)C=CC=C4)C)=O</chem>             |
| DT20 |   | DBA3 |  |
|      | <chem>O=C(O)CC1=C(C(C2=CC=C(Br)C=C2)NC(N1)=S)C(OC)=O</chem>                         |      | <chem>CC(N=C1N2C3=C(S1)C=CC=C3)=C(C2C4=CC(OCC(O)=O)=CC=C4)C(C)=O</chem>               |
| DT21 |  | DBA4 |  |
|      | <chem>O=C(O)CC1=C(C(C2=NC=CC=C2)NC(N1)=S)C(OC)=O</chem>                             |      | <chem>CC(N=C1N2C3=C(S1)C=CC=C3)=C(C2C4=CC=C(C=C4)OCC(O)=O)C(C)=O</chem>               |

|      |                                                                                     |      |                                                                                       |
|------|-------------------------------------------------------------------------------------|------|---------------------------------------------------------------------------------------|
| DT22 | 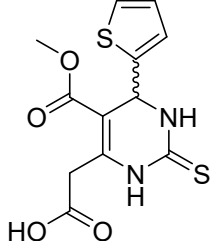   | DBE2 |    |
|      | <chem>O=C(O)CC1=C(C(C2=CC=CS2)NC(N1)=S)C(OC)=O</chem>                               |      | <chem>OC(COC1=C(C=CC=C1)C2C(C(OC)=O)=C(N=C3N2C4=C(S3)C=CC=C4)C)=O</chem>              |
| DT23 |    | DBE3 |    |
|      | <chem>O=C(O)CC1=C(C(C2=CNC3=C2C=CC=C3)NC(N1)=S)C(OC)=O</chem>                       |      | <chem>CC(N=C1N2C3=C(S1)C=CC=C3)=C(C2C4=CC(OCC(O)=O)=CC=C4)C(OC)=O</chem>              |
| DT24 |   | DBE4 |   |
|      | <chem>O=C(O)CC1=C(C(C=C/C2=CC=CC=C2)NC(N1)=S)C(OC)=O</chem>                         |      | <chem>CC(N=C1N2C3=C(S1)C=CC=C3)=C(C2C4=CC=C(C=C4)OCC(O)=O)C(OC)=O</chem>              |
| DT25 |  | DTA2 |  |
|      | <chem>O=C(O)CC1=C(C(C=C/C2=CC=C(OC)C=C2)NC(N1)=S)C(OC)=O</chem>                     |      | <chem>OC(COC1=C(C=CC=C1)C2C(C(C)=O)=C(NC(N2)=S)C)=O</chem>                            |

|      |                                                                                     |      |                                                                                       |
|------|-------------------------------------------------------------------------------------|------|---------------------------------------------------------------------------------------|
| DT26 | 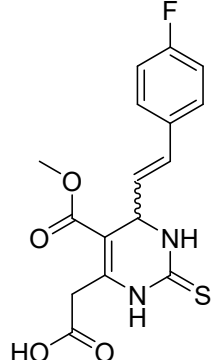   | DTA3 |    |
|      | <chem>O=C(O)CC1=C(C(/C=C/C2=CC=C(F)C=C2)NC(N1)=S)C(OC)=O</chem>                     |      | <chem>CC(NC(NC1C2=CC(OCC(O)=O)=CC=C2)=S)=C1C(C)=O</chem>                              |
| DT27 |    | DTA4 |    |
|      | <chem>O=C(O)CC1=C(C(/C=C/C2=CC=C(Br)C=C2)NC(N1)=S)C(OC)=O</chem>                    |      | <chem>CC(NC(NC1C2=CC=C(C=C2)OCC(O)=O)=S)=C1C(C)=O</chem>                              |
| DT28 |  | DTE2 |  |
|      | <chem>O=C(O)CC1=C(C(/C=C/C2=C([N+](=O)[O-])C=CC=C2)NC(N1)=S)C(OC)=O</chem>          |      | <chem>OC(COC1=C(C=CC=C1)C2C(C(OCC)=O)=C(NC(N2)=S)C)=O</chem>                          |
| DT29 |  | DTE3 |   |
|      | <chem>O=C(O)CC1=C(C(/C(Br)=C/C2=CC=CC=C2)NC(N1)=S)C(OC)=O</chem>                    |      | <chem>CC(NC(NC1C2=CC(OCC(O)=O)=CC=C2)=S)=C1C(OCC)=O</chem>                            |

|      |                                                                                     |      |                                                                                       |
|------|-------------------------------------------------------------------------------------|------|---------------------------------------------------------------------------------------|
| DT30 | 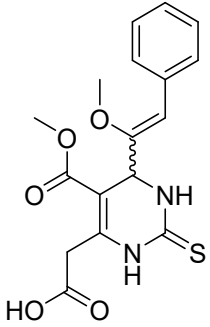   | DTE4 |    |
|      | <chem>O=C(O)CC1=C(C(/C(OC)=C/C2=CC=CC=C2)NC(N1)=S)C(OC)=O</chem>                    |      | <chem>CC(NC(NC1C2=CC=C(C=C2)OCC(O)=O)=S)=C1C(OCC)=O</chem>                            |
| DU01 |    | DUA2 |    |
|      | <chem>O=C(O)CC1=C(C(C2=CC=CC=C2)NC(N1)=O)C(OC)=O</chem>                             |      | <chem>OC(COC1=C(C=CC=C1)C2C(C(C)=O)=C(NC(N2)=O)C)=O</chem>                            |
| DU02 |   | DUA3 |   |
|      | <chem>O=C(O)CC1=C(C(C2=C(O)C=CC=C2)NC(N1)=O)C(OC)=O</chem>                          |      | <chem>CC(NC(NC1C2=CC(OCC(O)=O)=CC=C2)=O)=C1C(C)=O</chem>                              |
| DU03 |  | DUA4 |  |
|      | <chem>O=C(O)CC1=C(C(C2=CC(O)=CC=C2)NC(N1)=O)C(OC)=O</chem>                          |      | <chem>CC(NC(NC1C2=CC=C(C=C2)OCC(O)=O)=O)=C1C(C)=O</chem>                              |



|      |                                                                                     |      |                                                                                       |
|------|-------------------------------------------------------------------------------------|------|---------------------------------------------------------------------------------------|
| DU04 | 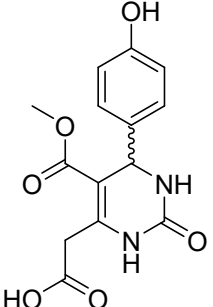   | DUE2 |    |
|      | <chem>O=C(O)CC1=C(C(C2=CC=C(O)C=C2)NC(N1)=O)C(OC)=O</chem>                          |      | <chem>OC(COC1=C(C=CC=C1)C2C(C(C)C(OC)=O)=C(NC(N2)=O)C)=O</chem>                       |
| DU05 |    | DUE3 |    |
|      | <chem>O=C(O)CC1=C(C(C2=C(O)C=C(O)C=C2)NC(N1)=O)C(OC)=O</chem>                       |      | <chem>CC(NC(NC1C2=CC(OCC(O)=O)=CC=C2)=O)=C1C(OCC)=O</chem>                            |
| DU06 |   | DUE4 |   |
|      | <chem>O=C(O)CC1=C(C(C2=CC(O)=C(O)C=C2)NC(N1)=O)C(OC)=O</chem>                       |      | <chem>CC(NC(NC1C2=CC=C(C=C2)OCC(O)=O)=O)=C1C(OCC)=O</chem>                            |
| DU07 |  | DZA2 |  |
|      | <chem>O=C(O)CC1=C(C(C2=CC(OC)=C(O)C=C2)NC(N1)=O)C(OC)=O</chem>                      |      | <chem>OC(COC1=C(C=CC=C1)C2C(C(C)C(=O)O)=C(NC3=NN=NN3)C)=O</chem>                      |

|      |                                                                                     |      |                                                                                       |
|------|-------------------------------------------------------------------------------------|------|---------------------------------------------------------------------------------------|
| DU08 | 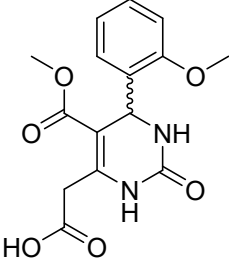   | DZA3 |    |
|      | <chem>O=C(O)CC1=C(C(C2=C(OC)C=CC=C2)NC(N1)=O)C(OC)=O</chem>                         |      | <chem>CC(NC1=NN=NN1C2C3=CC(OCC(O)=O)=CC=C3)=C2C(C)=O</chem>                           |
| DU09 |    | DZA4 |    |
|      | <chem>O=C(O)CC1=C(C(C2=C(OC)C=CC=C2)NC(N1)=O)C(OC)=O</chem>                         |      | <chem>CC(NC1=NN=NN1C2C3=CC=C(C=C3)OCC(O)=O)=C2C(C)=O</chem>                           |
| DU10 |   | DZE2 |   |
|      | <chem>O=C(O)CC1=C(C(C2=C(OC)C=C(OC)C=C2)NC(N1)=O)C(OC)=O</chem>                     |      | <chem>OC(COC1=C(C=CC=C1)C2C(C(OCC)=O)=C(NC3=NN=NN32)C)=O</chem>                       |
| DU11 |  | DZE3 |  |
|      | <chem>O=C(O)CC1=C(C(C2=C(OC)C=CC(OC)=C2)NC(N1)=O)C(OC)=O</chem>                     |      | <chem>CC(NC1=NN=NN1C2C3=CC(OCC(O)=O)=CC=C3)=C2C(C(OCC)=O)=O</chem>                    |

|      |                                                                                   |      |                                                                                     |
|------|-----------------------------------------------------------------------------------|------|-------------------------------------------------------------------------------------|
| DU12 | 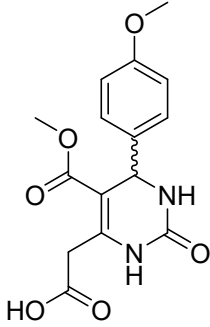 | DZE4 |  |
|      | <chem>O=C(O)CC1=C(C(C2=CC=C(OC)C=C2)NC(N1)=O)C(OC)=O</chem>                       |      | <chem>CC(NC1=NN=NN1C2C3=CC=C(C=C3)OCC(O)=O)=C2C(OC)=O</chem>                        |

**Table S2.** List of marketed antiinflammatory drugs which used as references

| No. | Compound (CAS)            | SMILES                                                        | Docking score (kcal/mol) |
|-----|---------------------------|---------------------------------------------------------------|--------------------------|
| 1   | Phenylbutazone (50-33-9)  | <chem>CCCCC1C(=O)N(N(C1=O)C1CCCCC1)C1CCCCC1</chem>            | -42.74                   |
| 2   | Difenamizole (20170-20-1) | <chem>CN(C(C(=O)NC1CC(NN1C1CCCCC1)C1CCCCC1)C)C</chem>         | -49.36                   |
| 3   | Sulfinpyrazone (57-96-5)  | <chem>O=C1N(C2CCCCC2)N(C(=O)C1CCS(=O)C1CCCCC1)C1CCCCC1</chem> | 79.08                    |
| 4   | Aspirin (50-78-2)         | <chem>CC(=O)OC1CCCCC1C(=O)O</chem>                            | -42.00                   |
| 5   | Salsalate (552-94-3)      | <chem>OC1CCCCC1C(=O)OC1CCCCC1C(=O)O</chem>                    | -54.68                   |
| 6   | Benorilate (5003-48-5)    | <chem>CC(=O)NC1CCC(CC1)OC(=O)C1CCCCC1OC(=O)C</chem>           | -52.35                   |
| 7   | Diclofenac (15307-86-5)   | <chem>OC(=O)CC1CCCCC1NC1C(Cl)CCCC1Cl</chem>                   | -62.16                   |
| 8   | Sulindac (38194-50-2)     | <chem>OC(=O)CC1=C(C)C(=CC2CCC(CC2)S(=O)C)C2C1CC(F)CC2</chem>  | -27.48                   |
| 9   | Indomethacin (53-86-1)    | <chem>COC1CCC2C(C1)C(CC(=O)O)C(N2C(=O)C1CCC(CC1)Cl)C</chem>   | -40.52                   |
| 10  | Mofezolac (78967-07-4)    | <chem>COC1CCC(CC1)C1C(ONC1C1CCC(CC1)OC)CC(=O)O</chem>         | -66.84                   |
| 11  | Bromfenac (91714-94-2)    | <chem>OC(=O)CC1CCCC(C1N)C(=O)C1CCC(CC1)Br</chem>              | -60.38                   |
| 12  | Etodolac (41340-25-4)     | <chem>CCC1(OCCC2C1[NH]C1C2CCCC1CC)CC(=O)O</chem>              | -26.38                   |
| 13  | Piroxicam (36322-90-4)    | <chem>O=C(C1=C(O)C2CCCCC2S(=O)(=O)N1C)NC1CCCCN1</chem>        | -34.46                   |
| 14  | Meloxicam (71125-38-7)    | <chem>CC1CNC(S1)NC(=O)C1=C(O)C2CCCCC2S(=O)(=O)N1C</chem>      | -27.21                   |
| 15  | Ibuprofen (15687-27-1)    | <chem>CC(CC1CCC(CC1)C(C(=O)O)C)C</chem>                       | -47.69                   |
| 16  | Flurbiprofen (5104-49-4)  | <chem>OC(=O)C(C1CCC(C(C1)F)C1CCCCC1)C</chem>                  | -50.33                   |
| 17  | Naproxen (22204-53-1)     | <chem>COC1CCC2C(C1)CCC(C2)C(C(=O)O)C</chem>                   | -53.80                   |
| 18  | Ketoprofen (22071-15-4)   | <chem>OC(=O)C(C1CCCC(C1)C(=O)C1CCCCC1)C</chem>                | -58.12                   |
| 19  | Fenoprofen (29679-58-1)   | <chem>OC(=O)C(C1CCCC(C1)OC1CCCCC1)C</chem>                    | -53.34                   |
| 20  | Oxaprozin (22204-53-1)    | <chem>OC(=O)CCC1NC(C(O1)C1CCCCC1)C1CCCCC1</chem>              | -60.69                   |
| 21  | Mefenamic acid (61-68-7)  | <chem>OC(=O)C1CCCCC1NC1CCCC(C1)C</chem>                       | -56.69                   |
| 22  | Azapropazone (13539-59-8) | <chem>CCCC1C(=O)N2N(C1=O)C1CC(C)CCC1NC2N(C)C</chem>           | -55.82                   |
| 23  | Etofenamate (30544-47-9)  | <chem>OCCOCCOC(=O)C1CCCCC1NC1CCCC(C1)C(F)(F)F</chem>          | -68.04                   |
| 24  | Celecoxib (169590-42-5)   | <chem>CC1CCC(CC1)C1CC(NN1C1CCC(CC1)S(=O)(=O)N)C(F)(F)F</chem> | -63.75                   |
| 25  | Robenacoxib (220991-32-2) | <chem>CCC1CCC(C(C1)CC(=O)O)NC1C(F)C(F)CC(C1)F</chem>          | -64.80                   |
| 26  | Firocoxib (189954-96-9)   | <chem>O=C1OC(C(=C1OCC1CC1)C1CCC(CC1)S(=O)(=O)C)(C)C</chem>    | -58.82                   |
| 27  | Nimesulide (51803-78-2)   | <chem>[O-][N+](=O)C1CCC(C(C1)OC1CCCCC1)NS(=O)(=O)C</chem>     | -56.53                   |
| 28  | Nabumetone (42924-53-8)   | <chem>COC1CCC2C(C1)CCC(C2)CCC(=O)C</chem>                     | -50.27                   |
| 29  | Benzydamine (642-72-8)    | <chem>CN(CCCOC1NN(C2C1CCCC2)CC1CCCCC1)C</chem>                | -56.44                   |
| 30  | Lumiracoxib (220991-20-8) | <chem>OC(=O)CC1CC(C)CCC1NC1C(F)CCCC1Cl</chem>                 | -64.16                   |

**Table S3** The type of contribution for each residue based on decomposition energy (in kcal/mol)

| Residue            | van der Waals | Electrostatic | Polar Solvation | Non-Polar Solvation | Total  | Type of contribution          |
|--------------------|---------------|---------------|-----------------|---------------------|--------|-------------------------------|
| <b>COX-2:LUR</b>   |               |               |                 |                     |        |                               |
| Tyr317             | -0.793        | -2.850        | 2.816           | -0.017              | -0.843 | van der Waals                 |
| Val318             | -1.816        | -0.418        | 0.563           | -0.197              | -1.868 | van der Waals                 |
| Leu321             | -1.287        | -1.330        | 1.188           | -0.123              | -1.552 | van der Waals                 |
| Ser322             | -0.842        | -1.338        | 1.507           | -0.090              | -0.763 | van der Waals                 |
| Tyr354             | -0.612        | -7.789        | 4.635           | -0.069              | -3.835 | Electrostatic                 |
| Phe487             | -0.777        | -0.724        | 1.169           | -0.055              | -0.387 | van der Waals                 |
| Val492             | -1.539        | 0.895         | -0.727          | -0.146              | -1.516 | van der Waals                 |
| Gly495             | -0.895        | 0.066         | -0.509          | -0.062              | -1.400 | van der Waals                 |
| Ala496             | -1.852        | 0.685         | -0.575          | -0.176              | -1.918 | van der Waals                 |
| Ser499             | 0.335         | -10.566       | 5.477           | -0.099              | -4.853 | Electrostatic                 |
| <b>COX-2:RDUE2</b> |               |               |                 |                     |        |                               |
| Tyr317             | -0.582        | -2.822        | 2.696           | -0.016              | -0.724 | van der Waals                 |
| Val318             | -1.541        | -0.501        | 0.530           | -0.217              | -1.728 | van der Waals                 |
| Leu321             | -2.340        | -0.184        | 1.132           | -0.171              | -1.562 | van der Waals                 |
| Ser322             | -1.693        | -1.221        | 1.798           | -0.171              | -1.287 | van der Waals                 |
| Tyr354             | 0.203         | -8.986        | 4.955           | -0.087              | -3.915 | Electrostatic                 |
| Phe487             | -1.803        | -0.753        | 1.291           | -0.119              | -1.385 | van der Waals                 |
| Val492             | -2.044        | 1.385         | -0.955          | -0.200              | -1.815 | van der Waals                 |
| Gly495             | -0.733        | -1.156        | 0.613           | -0.034              | -1.311 | van der Waals                 |
| Ala496             | -2.210        | -0.063        | 0.362           | -0.307              | -2.218 | van der Waals                 |
| Ser499             | 0.210         | -10.069       | 5.688           | -0.106              | -4.278 | Electrostatic                 |
| <b>COX-2:SDT29</b> |               |               |                 |                     |        |                               |
| Tyr317             | -0.510        | -2.682        | 2.493           | -0.016              | -0.715 | van der Waals                 |
| Val318             | -1.292        | -0.287        | 0.331           | -0.194              | -1.442 | van der Waals                 |
| Leu321             | -1.685        | -0.890        | 1.103           | -0.154              | -1.626 | van der Waals                 |
| Ser322             | -1.284        | -1.343        | 1.801           | -0.156              | -0.982 | van der Waals                 |
| Tyr354             | 0.368         | -8.263        | 4.230           | -0.086              | -3.751 | Electrostatic                 |
| Phe487             | -0.714        | -0.508        | 0.937           | -0.052              | -0.338 | van der Waals                 |
| Val492             | -2.826        | -1.304        | 0.822           | -0.286              | -3.593 | van der Waals & Electrostatic |
| Gly495             | -0.977        | 0.161         | 0.189           | -0.056              | -0.683 | van der Waals                 |
| Ala496             | -1.604        | 1.381         | -1.177          | -0.127              | -1.526 | van der Waals                 |
| Ser499             | -0.486        | -8.220        | 4.984           | -0.165              | -3.888 | Electrostatic                 |

**Table S4** Analysis of hydrogen bonds between ligands and residues.

| Acceptor           | Donor       | Fraction (%) | Average distance (Å) | Average angle (°) |
|--------------------|-------------|--------------|----------------------|-------------------|
| <b>COX-2:LUR</b>   |             |              |                      |                   |
| LUR (O3)           | Ser499 (OG) | 93.7         | 2.60                 | 165.54            |
| LUR (O1)           | Tyr354 (OH) | 88.5         | 2.72                 | 161.92            |
| <b>COX-2:RDUE2</b> |             |              |                      |                   |
| RDUE2 (O6)         | Tyr354 (OH) | 77.6         | 2.67                 | 166.21            |
| RDUE2 (O1)         | Ser499 (OG) | 64.3         | 2.69                 | 164.90            |
| <b>COX-2:SDT29</b> |             |              |                      |                   |
| SDT29 (O3)         | Tyr354 (OH) | 98.7         | 2.65                 | 165.49            |
| SDT29 (O4)         | Ser499 (OG) | 96.7         | 2.67                 | 164.16            |
| Val492 (O)         | SDT29 (N1)  | 26.5         | 2.88                 | 152.13            |

**Table S5** Analysis of van der Waals interaction between ligands and residues.

| Ligand             | Residue      | Fraction (%) | Average distance (Å) |
|--------------------|--------------|--------------|----------------------|
| <b>COX-2:LUR</b>   |              |              |                      |
| LUR (O3)           | Ser499 (CB)  | 93.7         | 3.25                 |
| LUR (C2)           | Ser499 (OG)  | 63.3         | 3.38                 |
| LUR (C4)           | Tyr354 (OH)  | 53.4         | 3.38                 |
| LUR (O1)           | Ser499 (OG)  | 21.1         | 3.35                 |
| <b>COX-2:RDUE2</b> |              |              |                      |
| RDUE2 (O5)         | Leu321 (O)   | 71.9         | 3.23                 |
| RDUE2 (C12)        | Leu321 (O)   | 66.1         | 3.21                 |
| RDUE2 (O1)         | Ser499 (CB)  | 57.4         | 3.34                 |
| RDUE2 (C14)        | Val492 (O)   | 52.2         | 3.35                 |
| RDUE2 (C14)        | Met491 (O)   | 29.4         | 3.39                 |
| RDUE2 (O2)         | Leu321 (CD1) | 23.5         | 3.37                 |
| RDUE2 (C13)        | Val492 (O)   | 12.6         | 3.40                 |
| RDUE2 (N2)         | Leu321 (CB)  | 5.85         | 3.43                 |
| <b>COX-2:SDT29</b> |              |              |                      |
| SDT29 (C15)        | Ser499 (OG)  | 71.3         | 3.32                 |
| SDT29 (O1)         | Val318 (CG1) | 67.2         | 3.28                 |
| SDT29 (C9)         | Tyr324 (OH)  | 57.6         | 3.22                 |
| SDT29 (C14)        | Ser499 (OG)  | 48.3         | 3.34                 |
| SDT29 (C4)         | Val492 (O)   | 41.3         | 3.35                 |
| SDT29 (C8)         | Tyr324 (OH)  | 37.1         | 3.29                 |
| SDT29 (C6)         | Val492 (O)   | 34.4         | 3.32                 |
| SDT29 (S1)         | Leu353 (CD2) | 3.05         | 3.42                 |
