# Supplementary material for: Bioactivity of dihydropyrimidinone derivatives as inhibitors of cyclooxygenase-2 (COX-2): an in silico approach
Source: RSC Adv. 2023 Nov 23;13(49):34348–57. doi: 10.1039/d3ra05942a (PMC10665647; doi:10.1039/d3ra05942a)
Supplement: RA-013-D3RA05942A-s001 [file RA-013-D3RA05942A-s001.sdf]

RDB01
 OpenBabel09302314563D

 42 45  0  0  1  0  0  0  0  0999 V2000
    3.5350   -1.7460    0.9930 O   0  5  0  0  0  0  0  0  0  0  0  0
    4.1000   -1.5930   -0.0890 C   0  0  0  0  0  3  0  0  0  0  0  0
    3.2920   -0.6900   -1.1630 C   0  0  0  0  0  0  0  0  0  0  0  0
    1.8990   -0.5270   -0.7490 C   0  0  0  0  0  0  0  0  0  0  0  0
    1.4090    0.4950    0.0100 C   0  0  0  0  0  0  0  0  0  0  0  0
    2.2300    1.6480    0.4010 C   0  0  0  0  0  0  0  0  0  0  0  0
    2.5200    1.8260    1.7250 O   0  0  0  0  0  0  0  0  0  0  0  0
    2.5020    0.6820    2.5680 C   0  0  0  0  0  0  0  0  0  0  0  0
    2.6190    2.5190   -0.3370 O   0  0  0  0  0  0  0  0  0  0  0  0
   -0.0150    0.5710    0.4880 C   0  0  2  0  0  0  0  0  0  0  0  0
   -0.0240    0.7120    1.6100 H   0  0  0  0  0  0  0  0  0  0  0  0
   -0.7220   -0.6980    0.2090 N   0  0  0  0  0  0  0  0  0  0  0  0
   -2.0530   -0.9450    0.5390 C   0  0  0  0  0  0  0  0  0  0  0  0
   -2.5750   -2.1110   -0.0760 C   0  0  0  0  0  0  0  0  0  0  0  0
   -1.3710   -2.8820   -1.1120 S   0  0  0  0  0  0  0  0  0  0  0  0
   -0.1650   -1.6050   -0.7160 C   0  0  0  0  0  0  0  0  0  0  0  0
    1.0290   -1.5550   -1.1940 N   0  0  0  0  0  0  0  0  0  0  0  0
   -3.8760   -2.5100    0.1620 C   0  0  0  0  0  0  0  0  0  0  0  0
   -4.6700   -1.7450    1.0190 C   0  0  0  0  0  0  0  0  0  0  0  0
   -4.1570   -0.5970    1.6260 C   0  0  0  0  0  0  0  0  0  0  0  0
   -2.8490   -0.1820    1.3990 C   0  0  0  0  0  0  0  0  0  0  0  0
   -0.7390    1.7190   -0.1950 C   0  0  0  0  0  0  0  0  0  0  0  0
   -1.2270    2.7790    0.5680 C   0  0  0  0  0  0  0  0  0  0  0  0
   -1.9090    3.8240   -0.0530 C   0  0  0  0  0  0  0  0  0  0  0  0
   -2.1000    3.8100   -1.4330 C   0  0  0  0  0  0  0  0  0  0  0  0
   -1.5950    2.7590   -2.1970 C   0  0  0  0  0  0  0  0  0  0  0  0
   -0.9090    1.7160   -1.5800 C   0  0  0  0  0  0  0  0  0  0  0  0
    5.1840   -1.9850   -0.5040 O   0  5  0  0  0  0  0  0  0  0  0  0
    3.4040   -1.2160   -2.1250 H   0  0  0  0  0  0  0  0  0  0  0  0
    3.8490    0.2580   -1.2260 H   0  0  0  0  0  0  0  0  0  0  0  0
    3.2730    0.9020    3.3120 H   0  0  0  0  0  0  0  0  0  0  0  0
    2.7770   -0.2460    2.0210 H   0  0  0  0  0  0  0  0  0  0  0  0
    1.5170    0.5900    3.0230 H   0  0  0  0  0  0  0  0  0  0  0  0
   -4.2880   -3.4030   -0.3040 H   0  0  0  0  0  0  0  0  0  0  0  0
   -5.6940   -2.0450    1.2140 H   0  0  0  0  0  0  0  0  0  0  0  0
   -4.7930   -0.0130    2.2900 H   0  0  0  0  0  0  0  0  0  0  0  0
   -2.4590    0.7170    1.8680 H   0  0  0  0  0  0  0  0  0  0  0  0
   -1.0620    2.8050    1.6440 H   0  0  0  0  0  0  0  0  0  0  0  0
   -2.2860    4.6520    0.5400 H   0  0  0  0  0  0  0  0  0  0  0  0
   -2.6340    4.6230   -1.9160 H   0  0  0  0  0  0  0  0  0  0  0  0
   -1.7280    2.7560   -3.2750 H   0  0  0  0  0  0  0  0  0  0  0  0
   -0.4910    0.9040   -2.1760 H   0  0  0  0  0  0  0  0  0  0  0  0
  1  2  1  0  0  0  0
  2  3  1  0  0  0  0
  2 28  1  0  0  0  0
  3  4  1  0  0  0  0
  3 29  1  0  0  0  0
  3 30  1  0  0  0  0
  4  5  2  0  0  0  0
  4 17  1  0  0  0  0
  5  6  1  0  0  0  0
  5 10  1  0  0  0  0
  6  7  1  0  0  0  0
  6  9  2  0  0  0  0
  7  8  1  0  0  0  0
  8 31  1  0  0  0  0
  8 32  1  0  0  0  0
  8 33  1  0  0  0  0
 10 11  1  1  0  0  0
 10 12  1  0  0  0  0
 10 22  1  0  0  0  0
 12 13  1  0  0  0  0
 12 16  1  0  0  0  0
 13 14  2  0  0  0  0
 13 21  1  0  0  0  0
 14 15  1  0  0  0  0
 14 18  1  0  0  0  0
 15 16  1  0  0  0  0
 16 17  2  0  0  0  0
 18 19  2  0  0  0  0
 18 34  1  0  0  0  0
 19 20  1  0  0  0  0
 19 35  1  0  0  0  0
 20 21  2  0  0  0  0
 20 36  1  0  0  0  0
 21 37  1  0  0  0  0
 22 23  2  0  0  0  0
 22 27  1  0  0  0  0
 23 24  1  0  0  0  0
 23 38  1  0  0  0  0
 24 25  2  0  0  0  0
 24 39  1  0  0  0  0
 25 26  1  0  0  0  0
 25 40  1  0  0  0  0
 26 27  2  0  0  0  0
 26 41  1  0  0  0  0
 27 42  1  0  0  0  0
M  CHG  2   1  -1  28  -1
M  END
$$$$
RDB02
 OpenBabel09302314563D

 43 46  0  0  1  0  0  0  0  0999 V2000
    3.5790   -1.0420    1.2390 O   0  5  0  0  0  0  0  0  0  0  0  0
    3.8660   -1.8830    0.3810 C   0  0  0  0  0  3  0  0  0  0  0  0
    2.9250   -1.8810   -0.9200 C   0  0  0  0  0  0  0  0  0  0  0  0
    1.5970   -1.3550   -0.5950 C   0  0  0  0  0  0  0  0  0  0  0  0
    1.3430   -0.1580    0.0080 C   0  0  0  0  0  0  0  0  0  0  0  0
    2.3940    0.7630    0.4340 C   0  0  0  0  0  0  0  0  0  0  0  0
    3.3870    0.8830   -0.4830 O   0  0  0  0  0  0  0  0  0  0  0  0
    4.5570    1.5440   -0.0050 C   0  0  0  0  0  0  0  0  0  0  0  0
    2.3240    1.5230    1.3900 O   0  0  0  0  0  0  0  0  0  0  0  0
   -0.0310    0.2830    0.4430 C   0  0  2  0  0  0  0  0  0  0  0  0
   -0.0070    0.4960    1.5590 H   0  0  0  0  0  0  0  0  0  0  0  0
   -1.0090   -0.8120    0.2570 N   0  0  0  0  0  0  0  0  0  0  0  0
   -2.3680   -0.7010    0.5520 C   0  0  0  0  0  0  0  0  0  0  0  0
   -3.1350   -1.7870    0.0640 C   0  0  0  0  0  0  0  0  0  0  0  0
   -2.1230   -2.9450   -0.8050 S   0  0  0  0  0  0  0  0  0  0  0  0
   -0.6600   -1.9330   -0.5130 C   0  0  0  0  0  0  0  0  0  0  0  0
    0.5270   -2.2260   -0.9240 N   0  0  0  0  0  0  0  0  0  0  0  0
   -4.4990   -1.8400    0.2880 C   0  0  0  0  0  0  0  0  0  0  0  0
   -5.1040   -0.8040    1.0010 C   0  0  0  0  0  0  0  0  0  0  0  0
   -4.3460    0.2670    1.4830 C   0  0  0  0  0  0  0  0  0  0  0  0
   -2.9740    0.3350    1.2690 C   0  0  0  0  0  0  0  0  0  0  0  0
   -0.4730    1.5090   -0.3240 C   0  0  0  0  0  0  0  0  0  0  0  0
   -0.4480    2.7740    0.2840 C   0  0  0  0  0  0  0  0  0  0  0  0
    0.0350    2.9580    1.5300 O   0  0  0  0  0  0  0  0  0  0  0  0
   -0.9710    3.9050   -0.3560 C   0  0  0  0  0  0  0  0  0  0  0  0
   -1.4750    3.7720   -1.6440 C   0  0  0  0  0  0  0  0  0  0  0  0
   -1.4440    2.5350   -2.2910 C   0  0  0  0  0  0  0  0  0  0  0  0
   -0.9430    1.4150   -1.6320 C   0  0  0  0  0  0  0  0  0  0  0  0
    4.7720   -2.7070    0.3400 O   0  5  0  0  0  0  0  0  0  0  0  0
    2.9020   -2.9120   -1.3120 H   0  0  0  0  0  0  0  0  0  0  0  0
    3.4680   -1.2660   -1.6560 H   0  0  0  0  0  0  0  0  0  0  0  0
    4.3350    2.5910    0.2140 H   0  0  0  0  0  0  0  0  0  0  0  0
    5.2590    1.4330   -0.8350 H   0  0  0  0  0  0  0  0  0  0  0  0
    4.9230    1.0260    0.8950 H   0  0  0  0  0  0  0  0  0  0  0  0
   -5.1000   -2.6680   -0.0810 H   0  0  0  0  0  0  0  0  0  0  0  0
   -6.1730   -0.8300    1.1820 H   0  0  0  0  0  0  0  0  0  0  0  0
   -4.8390    1.0660    2.0360 H   0  0  0  0  0  0  0  0  0  0  0  0
   -2.3850    1.1750    1.6380 H   0  0  0  0  0  0  0  0  0  0  0  0
    0.8910    2.4070    1.6720 H   0  0  0  0  0  0  0  0  0  0  0  0
   -0.9620    4.8590    0.1570 H   0  0  0  0  0  0  0  0  0  0  0  0
   -1.8840    4.6380   -2.1560 H   0  0  0  0  0  0  0  0  0  0  0  0
   -1.8120    2.4450   -3.3060 H   0  0  0  0  0  0  0  0  0  0  0  0
   -0.9220    0.4520   -2.1440 H   0  0  0  0  0  0  0  0  0  0  0  0
  1  2  1  0  0  0  0
  2  3  1  0  0  0  0
  2 29  1  0  0  0  0
  3  4  1  0  0  0  0
  3 30  1  0  0  0  0
  3 31  1  0  0  0  0
  4  5  2  0  0  0  0
  4 17  1  0  0  0  0
  5  6  1  0  0  0  0
  5 10  1  0  0  0  0
  6  7  1  0  0  0  0
  6  9  2  0  0  0  0
  7  8  1  0  0  0  0
  8 32  1  0  0  0  0
  8 33  1  0  0  0  0
  8 34  1  0  0  0  0
 10 11  1  1  0  0  0
 10 12  1  0  0  0  0
 10 22  1  0  0  0  0
 12 13  1  0  0  0  0
 12 16  1  0  0  0  0
 13 14  2  0  0  0  0
 13 21  1  0  0  0  0
 14 15  1  0  0  0  0
 14 18  1  0  0  0  0
 15 16  1  0  0  0  0
 16 17  2  0  0  0  0
 18 19  2  0  0  0  0
 18 35  1  0  0  0  0
 19 20  1  0  0  0  0
 19 36  1  0  0  0  0
 20 21  2  0  0  0  0
 20 37  1  0  0  0  0
 21 38  1  0  0  0  0
 22 23  2  0  0  0  0
 22 28  1  0  0  0  0
 23 24  1  0  0  0  0
 23 25  1  0  0  0  0
 24 39  1  0  0  0  0
 25 26  2  0  0  0  0
 25 40  1  0  0  0  0
 26 27  1  0  0  0  0
 26 41  1  0  0  0  0
 27 28  2  0  0  0  0
 27 42  1  0  0  0  0
 28 43  1  0  0  0  0
M  CHG  2   1  -1  29  -1
M  END
$$$$
RDB03
 OpenBabel09302314563D

 43 46  0  0  1  0  0  0  0  0999 V2000
    3.7220   -0.1530   -0.4010 O   0  5  0  0  0  0  0  0  0  0  0  0
    3.8480   -1.2650   -0.9270 C   0  0  0  0  0  3  0  0  0  0  0  0
    2.7780   -2.3560   -0.4380 C   0  0  0  0  0  0  0  0  0  0  0  0
    1.4870   -1.7120   -0.1820 C   0  0  0  0  0  0  0  0  0  0  0  0
    1.2860   -0.6970    0.7080 C   0  0  0  0  0  0  0  0  0  0  0  0
    2.3790   -0.2390    1.5700 C   0  0  0  0  0  0  0  0  0  0  0  0
    2.3320    1.1260    1.6910 O   0  0  0  0  0  0  0  0  0  0  0  0
    3.5410    1.7120    2.1560 C   0  0  0  0  0  0  0  0  0  0  0  0
    3.1330   -0.9100    2.2300 O   0  0  0  0  0  0  0  0  0  0  0  0
   -0.0040    0.0750    0.7810 C   0  0  2  0  0  0  0  0  0  0  0  0
   -0.2080    0.3860    1.8430 H   0  0  0  0  0  0  0  0  0  0  0  0
   -1.0930   -0.8300    0.3350 N   0  0  0  0  0  0  0  0  0  0  0  0
   -2.4490   -0.6860    0.6050 C   0  0  0  0  0  0  0  0  0  0  0  0
   -3.2740   -1.4750   -0.2390 C   0  0  0  0  0  0  0  0  0  0  0  0
   -2.3100   -2.4310   -1.3690 S   0  0  0  0  0  0  0  0  0  0  0  0
   -0.7870   -1.7890   -0.6530 C   0  0  0  0  0  0  0  0  0  0  0  0
    0.3970   -2.2150   -0.9390 N   0  0  0  0  0  0  0  0  0  0  0  0
   -4.6490   -1.4480   -0.1070 C   0  0  0  0  0  0  0  0  0  0  0  0
   -5.2160   -0.6470    0.8870 C   0  0  0  0  0  0  0  0  0  0  0  0
   -4.4060    0.1020    1.7420 C   0  0  0  0  0  0  0  0  0  0  0  0
   -3.0200    0.0920    1.6180 C   0  0  0  0  0  0  0  0  0  0  0  0
    0.0190    1.3180   -0.1050 C   0  0  0  0  0  0  0  0  0  0  0  0
   -1.0850    2.1750   -0.1050 C   0  0  0  0  0  0  0  0  0  0  0  0
   -1.0510    3.2990   -0.9260 C   0  0  0  0  0  0  0  0  0  0  0  0
   -2.1010    4.1750   -0.9850 O   0  0  0  0  0  0  0  0  0  0  0  0
    0.0420    3.6150   -1.7350 C   0  0  0  0  0  0  0  0  0  0  0  0
    1.1350    2.7560   -1.7030 C   0  0  0  0  0  0  0  0  0  0  0  0
    1.1250    1.6160   -0.8980 C   0  0  0  0  0  0  0  0  0  0  0  0
    4.6670   -1.6780   -1.7390 O   0  5  0  0  0  0  0  0  0  0  0  0
    3.2300   -2.7810    0.4770 H   0  0  0  0  0  0  0  0  0  0  0  0
    2.7320   -3.1530   -1.1970 H   0  0  0  0  0  0  0  0  0  0  0  0
    3.3510    2.7840    2.0710 H   0  0  0  0  0  0  0  0  0  0  0  0
    4.3660    1.3990    1.4960 H   0  0  0  0  0  0  0  0  0  0  0  0
    3.7380    1.4090    3.1870 H   0  0  0  0  0  0  0  0  0  0  0  0
   -5.2910   -2.0390   -0.7590 H   0  0  0  0  0  0  0  0  0  0  0  0
   -6.2950   -0.6140    0.9990 H   0  0  0  0  0  0  0  0  0  0  0  0
   -4.8670    0.7050    2.5220 H   0  0  0  0  0  0  0  0  0  0  0  0
   -2.3960    0.6630    2.3000 H   0  0  0  0  0  0  0  0  0  0  0  0
   -1.9530    1.9790    0.5080 H   0  0  0  0  0  0  0  0  0  0  0  0
   -2.8540    3.8760   -0.4290 H   0  0  0  0  0  0  0  0  0  0  0  0
    0.0250    4.5010   -2.3570 H   0  0  0  0  0  0  0  0  0  0  0  0
    2.0140    2.9670   -2.3120 H   0  0  0  0  0  0  0  0  0  0  0  0
    2.0220    0.9670   -0.8800 H   0  0  0  0  0  0  0  0  0  0  0  0
  1  2  1  0  0  0  0
  2  3  1  0  0  0  0
  2 29  1  0  0  0  0
  3  4  1  0  0  0  0
  3 30  1  0  0  0  0
  3 31  1  0  0  0  0
  4  5  2  0  0  0  0
  4 17  1  0  0  0  0
  5  6  1  0  0  0  0
  5 10  1  0  0  0  0
  6  7  1  0  0  0  0
  6  9  2  0  0  0  0
  7  8  1  0  0  0  0
  8 32  1  0  0  0  0
  8 33  1  0  0  0  0
  8 34  1  0  0  0  0
 10 11  1  1  0  0  0
 10 12  1  0  0  0  0
 10 22  1  0  0  0  0
 12 13  1  0  0  0  0
 12 16  1  0  0  0  0
 13 14  2  0  0  0  0
 13 21  1  0  0  0  0
 14 15  1  0  0  0  0
 14 18  1  0  0  0  0
 15 16  1  0  0  0  0
 16 17  2  0  0  0  0
 18 19  2  0  0  0  0
 18 35  1  0  0  0  0
 19 20  1  0  0  0  0
 19 36  1  0  0  0  0
 20 21  2  0  0  0  0
 20 37  1  0  0  0  0
 21 38  1  0  0  0  0
 22 23  2  0  0  0  0
 22 28  1  0  0  0  0
 23 24  1  0  0  0  0
 23 39  1  0  0  0  0
 24 25  1  0  0  0  0
 24 26  2  0  0  0  0
 25 40  1  0  0  0  0
 26 27  1  0  0  0  0
 26 41  1  0  0  0  0
 27 28  2  0  0  0  0
 27 42  1  0  0  0  0
 28 43  1  0  0  0  0
M  CHG  2   1  -1  29  -1
M  END
$$$$
RDB04
 OpenBabel09302314563D

 43 46  0  0  1  0  0  0  0  0999 V2000
    3.9680   -0.8700    0.9750 O   0  5  0  0  0  0  0  0  0  0  0  0
    4.4360   -0.9130   -0.1610 C   0  0  0  0  0  3  0  0  0  0  0  0
    3.4410   -0.3750   -1.3230 C   0  0  0  0  0  0  0  0  0  0  0  0
    2.0570   -0.4510   -0.8610 C   0  0  0  0  0  0  0  0  0  0  0  0
    1.4310    0.4650   -0.0680 C   0  0  0  0  0  0  0  0  0  0  0  0
    2.0680    1.7230    0.3300 C   0  0  0  0  0  0  0  0  0  0  0  0
    2.0170    2.0210    1.6810 O   0  0  0  0  0  0  0  0  0  0  0  0
    2.6090    1.0410    2.5270 C   0  0  0  0  0  0  0  0  0  0  0  0
    2.5070    2.5730   -0.3980 O   0  0  0  0  0  0  0  0  0  0  0  0
    0.0500    0.2800    0.5040 C   0  0  2  0  0  0  0  0  0  0  0  0
    0.1100    0.3220    1.6340 H   0  0  0  0  0  0  0  0  0  0  0  0
   -0.4790   -1.0570    0.1600 N   0  0  0  0  0  0  0  0  0  0  0  0
   -1.7320   -1.5300    0.5400 C   0  0  0  0  0  0  0  0  0  0  0  0
   -2.0680   -2.7670   -0.0640 C   0  0  0  0  0  0  0  0  0  0  0  0
   -0.7860   -3.3220   -1.1430 S   0  0  0  0  0  0  0  0  0  0  0  0
    0.2020   -1.8600   -0.7730 C   0  0  0  0  0  0  0  0  0  0  0  0
    1.3620   -1.6170   -1.2760 N   0  0  0  0  0  0  0  0  0  0  0  0
   -3.2740   -3.3820    0.2170 C   0  0  0  0  0  0  0  0  0  0  0  0
   -4.1570   -2.7600    1.1030 C   0  0  0  0  0  0  0  0  0  0  0  0
   -3.8270   -1.5390    1.6960 C   0  0  0  0  0  0  0  0  0  0  0  0
   -2.6170   -0.9080    1.4260 C   0  0  0  0  0  0  0  0  0  0  0  0
   -0.8690    1.3750   -0.0030 C   0  0  0  0  0  0  0  0  0  0  0  0
   -1.0660    2.4990    0.8010 C   0  0  0  0  0  0  0  0  0  0  0  0
   -1.8990    3.5300    0.3770 C   0  0  0  0  0  0  0  0  0  0  0  0
   -2.5150    3.4070   -0.8690 C   0  0  0  0  0  0  0  0  0  0  0  0
   -3.3610    4.3620   -1.3520 O   0  0  0  0  0  0  0  0  0  0  0  0
   -2.3160    2.3040   -1.7030 C   0  0  0  0  0  0  0  0  0  0  0  0
   -1.4750    1.2920   -1.2590 C   0  0  0  0  0  0  0  0  0  0  0  0
    5.5330   -1.2600   -0.5790 O   0  5  0  0  0  0  0  0  0  0  0  0
    3.6480   -0.9950   -2.2090 H   0  0  0  0  0  0  0  0  0  0  0  0
    3.7840    0.6490   -1.5340 H   0  0  0  0  0  0  0  0  0  0  0  0
    3.7020    1.1340    2.4500 H   0  0  0  0  0  0  0  0  0  0  0  0
    2.3340    0.0160    2.2370 H   0  0  0  0  0  0  0  0  0  0  0  0
    2.2460    1.3020    3.5210 H   0  0  0  0  0  0  0  0  0  0  0  0
   -3.5440   -4.3330   -0.2380 H   0  0  0  0  0  0  0  0  0  0  0  0
   -5.1080   -3.2300    1.3310 H   0  0  0  0  0  0  0  0  0  0  0  0
   -4.5320   -1.0700    2.3810 H   0  0  0  0  0  0  0  0  0  0  0  0
   -2.3690    0.0470    1.8810 H   0  0  0  0  0  0  0  0  0  0  0  0
   -0.5420    2.5830    1.7580 H   0  0  0  0  0  0  0  0  0  0  0  0
   -2.0500    4.4080    0.9910 H   0  0  0  0  0  0  0  0  0  0  0  0
   -3.4080    5.1450   -0.7600 H   0  0  0  0  0  0  0  0  0  0  0  0
   -2.8020    2.2570   -2.6720 H   0  0  0  0  0  0  0  0  0  0  0  0
   -1.2810    0.4310   -1.9000 H   0  0  0  0  0  0  0  0  0  0  0  0
  1  2  1  0  0  0  0
  2  3  1  0  0  0  0
  2 29  1  0  0  0  0
  3  4  1  0  0  0  0
  3 30  1  0  0  0  0
  3 31  1  0  0  0  0
  4  5  2  0  0  0  0
  4 17  1  0  0  0  0
  5  6  1  0  0  0  0
  5 10  1  0  0  0  0
  6  7  1  0  0  0  0
  6  9  2  0  0  0  0
  7  8  1  0  0  0  0
  8 32  1  0  0  0  0
  8 33  1  0  0  0  0
  8 34  1  0  0  0  0
 10 11  1  1  0  0  0
 10 12  1  0  0  0  0
 10 22  1  0  0  0  0
 12 13  1  0  0  0  0
 12 16  1  0  0  0  0
 13 14  2  0  0  0  0
 13 21  1  0  0  0  0
 14 15  1  0  0  0  0
 14 18  1  0  0  0  0
 15 16  1  0  0  0  0
 16 17  2  0  0  0  0
 18 19  2  0  0  0  0
 18 35  1  0  0  0  0
 19 20  1  0  0  0  0
 19 36  1  0  0  0  0
 20 21  2  0  0  0  0
 20 37  1  0  0  0  0
 21 38  1  0  0  0  0
 22 23  2  0  0  0  0
 22 28  1  0  0  0  0
 23 24  1  0  0  0  0
 23 39  1  0  0  0  0
 24 25  2  0  0  0  0
 24 40  1  0  0  0  0
 25 26  1  0  0  0  0
 25 27  1  0  0  0  0
 26 41  1  0  0  0  0
 27 28  2  0  0  0  0
 27 42  1  0  0  0  0
 28 43  1  0  0  0  0
M  CHG  2   1  -1  29  -1
M  END
$$$$
RDB05
 OpenBabel09302314563D

 44 47  0  0  1  0  0  0  0  0999 V2000
   -5.5020   -1.7710   -0.0340 O   0  5  0  0  0  0  0  0  0  0  0  0
   -4.4500   -1.2160   -0.3110 C   0  0  0  0  0  3  0  0  0  0  0  0
   -3.5580   -0.8520    1.0470 C   0  0  0  0  0  0  0  0  0  0  0  0
   -2.1620   -0.7880    0.6770 C   0  0  0  0  0  0  0  0  0  0  0  0
   -1.5180    0.2620    0.0670 C   0  0  0  0  0  0  0  0  0  0  0  0
   -2.1960    1.5240   -0.1740 C   0  0  0  0  0  0  0  0  0  0  0  0
   -1.7140    2.1170   -1.3190 O   0  0  0  0  0  0  0  0  0  0  0  0
   -2.3750    3.3140   -1.7000 C   0  0  0  0  0  0  0  0  0  0  0  0
   -3.0110    2.0980    0.5070 O   0  0  0  0  0  0  0  0  0  0  0  0
   -0.1420    0.1610   -0.5420 C   0  0  2  0  0  0  0  0  0  0  0  0
   -0.2480    0.1900   -1.6710 H   0  0  0  0  0  0  0  0  0  0  0  0
    0.4840   -1.1470   -0.2150 N   0  0  0  0  0  0  0  0  0  0  0  0
    1.7670   -1.5430   -0.5910 C   0  0  0  0  0  0  0  0  0  0  0  0
    2.1240   -2.8200   -0.0910 C   0  0  0  0  0  0  0  0  0  0  0  0
    0.8090   -3.5350    0.8420 S   0  0  0  0  0  0  0  0  0  0  0  0
   -0.2210   -2.0890    0.5480 C   0  0  0  0  0  0  0  0  0  0  0  0
   -1.4240   -1.9580    0.9930 N   0  0  0  0  0  0  0  0  0  0  0  0
    3.3690   -3.3610   -0.3550 C   0  0  0  0  0  0  0  0  0  0  0  0
    4.2700   -2.6300   -1.1310 C   0  0  0  0  0  0  0  0  0  0  0  0
    3.9160   -1.3770   -1.6360 C   0  0  0  0  0  0  0  0  0  0  0  0
    2.6680   -0.8200   -1.3800 C   0  0  0  0  0  0  0  0  0  0  0  0
    0.7400    1.2910   -0.0700 C   0  0  0  0  0  0  0  0  0  0  0  0
    1.1150    1.4460    1.2740 C   0  0  0  0  0  0  0  0  0  0  0  0
    0.6920    0.6370    2.2640 O   0  0  0  0  0  0  0  0  0  0  0  0
    1.9870    2.4620    1.6860 C   0  0  0  0  0  0  0  0  0  0  0  0
    2.4300    3.3510    0.7120 C   0  0  0  0  0  0  0  0  0  0  0  0
    3.2820    4.3690    1.0120 O   0  0  0  0  0  0  0  0  0  0  0  0
    2.0330    3.2720   -0.6270 C   0  0  0  0  0  0  0  0  0  0  0  0
    1.1820    2.2380   -0.9970 C   0  0  0  0  0  0  0  0  0  0  0  0
   -3.9300   -0.8540   -1.3540 O   0  5  0  0  0  0  0  0  0  0  0  0
   -3.8070   -1.6380    1.7740 H   0  0  0  0  0  0  0  0  0  0  0  0
   -4.0070    0.0930    1.3800 H   0  0  0  0  0  0  0  0  0  0  0  0
   -1.8910    3.5810   -2.6420 H   0  0  0  0  0  0  0  0  0  0  0  0
   -2.2290    4.0850   -0.9380 H   0  0  0  0  0  0  0  0  0  0  0  0
   -3.4450    3.1170   -1.8440 H   0  0  0  0  0  0  0  0  0  0  0  0
    3.6530   -4.3390    0.0290 H   0  0  0  0  0  0  0  0  0  0  0  0
    5.2520   -3.0390   -1.3440 H   0  0  0  0  0  0  0  0  0  0  0  0
    4.6320   -0.8230   -2.2420 H   0  0  0  0  0  0  0  0  0  0  0  0
    2.4030    0.1570   -1.7750 H   0  0  0  0  0  0  0  0  0  0  0  0
   -0.0900    0.0750    1.9910 H   0  0  0  0  0  0  0  0  0  0  0  0
    2.2760    2.5430    2.7240 H   0  0  0  0  0  0  0  0  0  0  0  0
    3.5100    4.3900    1.9700 H   0  0  0  0  0  0  0  0  0  0  0  0
    2.3800    4.0070   -1.3420 H   0  0  0  0  0  0  0  0  0  0  0  0
    0.8370    2.1710   -2.0340 H   0  0  0  0  0  0  0  0  0  0  0  0
  1  2  1  0  0  0  0
  2  3  1  0  0  0  0
  2 30  1  0  0  0  0
  3  4  1  0  0  0  0
  3 31  1  0  0  0  0
  3 32  1  0  0  0  0
  4  5  2  0  0  0  0
  4 17  1  0  0  0  0
  5  6  1  0  0  0  0
  5 10  1  0  0  0  0
  6  7  1  0  0  0  0
  6  9  2  0  0  0  0
  7  8  1  0  0  0  0
  8 33  1  0  0  0  0
  8 34  1  0  0  0  0
  8 35  1  0  0  0  0
 10 11  1  6  0  0  0
 10 12  1  0  0  0  0
 10 22  1  0  0  0  0
 12 13  1  0  0  0  0
 12 16  1  0  0  0  0
 13 14  2  0  0  0  0
 13 21  1  0  0  0  0
 14 15  1  0  0  0  0
 14 18  1  0  0  0  0
 15 16  1  0  0  0  0
 16 17  2  0  0  0  0
 18 19  2  0  0  0  0
 18 36  1  0  0  0  0
 19 20  1  0  0  0  0
 19 37  1  0  0  0  0
 20 21  2  0  0  0  0
 20 38  1  0  0  0  0
 21 39  1  0  0  0  0
 22 23  2  0  0  0  0
 22 29  1  0  0  0  0
 23 24  1  0  0  0  0
 23 25  1  0  0  0  0
 24 40  1  0  0  0  0
 25 26  2  0  0  0  0
 25 41  1  0  0  0  0
 26 27  1  0  0  0  0
 26 28  1  0  0  0  0
 27 42  1  0  0  0  0
 28 29  2  0  0  0  0
 28 43  1  0  0  0  0
 29 44  1  0  0  0  0
M  CHG  2   1  -1  30  -1
M  END
$$$$
RDB06
 OpenBabel09302314563D

 44 47  0  0  1  0  0  0  0  0999 V2000
    2.3750   -1.2510   -1.7850 O   0  5  0  0  0  0  0  0  0  0  0  0
    2.8400   -2.2700   -1.2640 C   0  0  0  0  0  3  0  0  0  0  0  0
    2.0460   -2.8530    0.0130 C   0  0  0  0  0  0  0  0  0  0  0  0
    0.8630   -2.0580    0.3470 C   0  0  0  0  0  0  0  0  0  0  0  0
    0.7930   -0.9820    1.2010 C   0  0  0  0  0  0  0  0  0  0  0  0
    1.8530   -0.6490    2.1300 C   0  0  0  0  0  0  0  0  0  0  0  0
    1.7970    0.6850    2.4590 O   0  0  0  0  0  0  0  0  0  0  0  0
    2.8510    1.1520    3.2860 C   0  0  0  0  0  0  0  0  0  0  0  0
    2.6750   -1.3640    2.6530 O   0  0  0  0  0  0  0  0  0  0  0  0
   -0.3290    0.0360    1.1120 C   0  0  2  0  0  0  0  0  0  0  0  0
   -0.6230    0.3970    2.1340 H   0  0  0  0  0  0  0  0  0  0  0  0
   -1.5280   -0.5890    0.5030 N   0  0  0  0  0  0  0  0  0  0  0  0
   -2.7740    0.0210    0.3890 C   0  0  0  0  0  0  0  0  0  0  0  0
   -3.6990   -0.7390   -0.3700 C   0  0  0  0  0  0  0  0  0  0  0  0
   -2.9530   -2.2120   -0.9960 S   0  0  0  0  0  0  0  0  0  0  0  0
   -1.3860   -1.7790   -0.2240 C   0  0  0  0  0  0  0  0  0  0  0  0
   -0.3080   -2.4850   -0.3200 N   0  0  0  0  0  0  0  0  0  0  0  0
   -4.9960   -0.2940   -0.5520 C   0  0  0  0  0  0  0  0  0  0  0  0
   -5.3760    0.9200    0.0210 C   0  0  0  0  0  0  0  0  0  0  0  0
   -4.4620    1.6760    0.7600 C   0  0  0  0  0  0  0  0  0  0  0  0
   -3.1560    1.2420    0.9530 C   0  0  0  0  0  0  0  0  0  0  0  0
    0.1670    1.1760    0.2410 C   0  0  0  0  0  0  0  0  0  0  0  0
    0.7760    0.8300   -0.9630 C   0  0  0  0  0  0  0  0  0  0  0  0
    1.4960    1.7780   -1.6720 C   0  0  0  0  0  0  0  0  0  0  0  0
    2.2590    1.4330   -2.7370 O   0  0  0  0  0  0  0  0  0  0  0  0
    1.4700    3.1230   -1.2560 C   0  0  0  0  0  0  0  0  0  0  0  0
    2.1150    4.1080   -1.9430 O   0  0  0  0  0  0  0  0  0  0  0  0
    0.7810    3.4890   -0.1040 C   0  0  0  0  0  0  0  0  0  0  0  0
    0.1530    2.5020    0.6640 C   0  0  0  0  0  0  0  0  0  0  0  0
    3.8240   -2.9320   -1.5630 O   0  5  0  0  0  0  0  0  0  0  0  0
    2.7980   -2.9040    0.8180 H   0  0  0  0  0  0  0  0  0  0  0  0
    1.8000   -3.8930   -0.2690 H   0  0  0  0  0  0  0  0  0  0  0  0
    2.6510    2.2250    3.3600 H   0  0  0  0  0  0  0  0  0  0  0  0
    3.8180    0.9620    2.8040 H   0  0  0  0  0  0  0  0  0  0  0  0
    2.8130    0.6650    4.2630 H   0  0  0  0  0  0  0  0  0  0  0  0
   -5.7140   -0.8690   -1.1330 H   0  0  0  0  0  0  0  0  0  0  0  0
   -6.3900    1.2840   -0.1150 H   0  0  0  0  0  0  0  0  0  0  0  0
   -4.7780    2.6270    1.1870 H   0  0  0  0  0  0  0  0  0  0  0  0
   -2.4420    1.8420    1.5130 H   0  0  0  0  0  0  0  0  0  0  0  0
    0.7670   -0.2090   -1.3310 H   0  0  0  0  0  0  0  0  0  0  0  0
    2.4690    0.4250   -2.6560 H   0  0  0  0  0  0  0  0  0  0  0  0
    2.6440    3.7120   -2.6840 H   0  0  0  0  0  0  0  0  0  0  0  0
    0.7660    4.5270    0.2060 H   0  0  0  0  0  0  0  0  0  0  0  0
   -0.3110    2.7750    1.6060 H   0  0  0  0  0  0  0  0  0  0  0  0
  1  2  1  0  0  0  0
  2  3  1  0  0  0  0
  2 30  1  0  0  0  0
  3  4  1  0  0  0  0
  3 31  1  0  0  0  0
  3 32  1  0  0  0  0
  4  5  2  0  0  0  0
  4 17  1  0  0  0  0
  5  6  1  0  0  0  0
  5 10  1  0  0  0  0
  6  7  1  0  0  0  0
  6  9  2  0  0  0  0
  7  8  1  0  0  0  0
  8 33  1  0  0  0  0
  8 34  1  0  0  0  0
  8 35  1  0  0  0  0
 10 11  1  1  0  0  0
 10 12  1  0  0  0  0
 10 22  1  0  0  0  0
 12 13  1  0  0  0  0
 12 16  1  0  0  0  0
 13 14  2  0  0  0  0
 13 21  1  0  0  0  0
 14 15  1  0  0  0  0
 14 18  1  0  0  0  0
 15 16  1  0  0  0  0
 16 17  2  0  0  0  0
 18 19  2  0  0  0  0
 18 36  1  0  0  0  0
 19 20  1  0  0  0  0
 19 37  1  0  0  0  0
 20 21  2  0  0  0  0
 20 38  1  0  0  0  0
 21 39  1  0  0  0  0
 22 23  2  0  0  0  0
 22 29  1  0  0  0  0
 23 24  1  0  0  0  0
 23 40  1  0  0  0  0
 24 25  1  0  0  0  0
 24 26  2  0  0  0  0
 25 41  1  0  0  0  0
 26 27  1  0  0  0  0
 26 28  1  0  0  0  0
 27 42  1  0  0  0  0
 28 29  2  0  0  0  0
 28 43  1  0  0  0  0
 29 44  1  0  0  0  0
M  CHG  2   1  -1  30  -1
M  END
$$$$
RDB07
 OpenBabel09302314563D

 47 50  0  0  1  0  0  0  0  0999 V2000
   -2.6160   -1.1180    1.5490 O   0  5  0  0  0  0  0  0  0  0  0  0
   -3.0630   -2.2070    1.1890 C   0  0  0  0  0  3  0  0  0  0  0  0
   -2.2750   -2.9020   -0.0430 C   0  0  0  0  0  0  0  0  0  0  0  0
   -1.0560   -2.1530   -0.3380 C   0  0  0  0  0  0  0  0  0  0  0  0
   -0.9080   -1.1050   -1.2130 C   0  0  0  0  0  0  0  0  0  0  0  0
   -1.9520   -0.6990   -2.1330 C   0  0  0  0  0  0  0  0  0  0  0  0
   -1.7790    0.6200   -2.4870 O   0  0  0  0  0  0  0  0  0  0  0  0
   -2.8020    1.1710   -3.3010 C   0  0  0  0  0  0  0  0  0  0  0  0
   -2.8430   -1.3420   -2.6350 O   0  0  0  0  0  0  0  0  0  0  0  0
    0.3140   -0.2110   -1.2220 C   0  0  2  0  0  0  0  0  0  0  0  0
    0.6450   -0.0330   -2.2840 H   0  0  0  0  0  0  0  0  0  0  0  0
    1.4440   -0.8790   -0.5270 N   0  0  0  0  0  0  0  0  0  0  0  0
    2.7390   -0.3720   -0.4330 C   0  0  0  0  0  0  0  0  0  0  0  0
    3.5620   -1.1040    0.4600 C   0  0  0  0  0  0  0  0  0  0  0  0
    2.6670   -2.4190    1.2250 S   0  0  0  0  0  0  0  0  0  0  0  0
    1.1800   -1.9670    0.3170 C   0  0  0  0  0  0  0  0  0  0  0  0
    0.0580   -2.5980    0.4140 N   0  0  0  0  0  0  0  0  0  0  0  0
    4.8860   -0.7550    0.6490 C   0  0  0  0  0  0  0  0  0  0  0  0
    5.4040    0.3320   -0.0570 C   0  0  0  0  0  0  0  0  0  0  0  0
    4.5960    1.0540   -0.9390 C   0  0  0  0  0  0  0  0  0  0  0  0
    3.2620    0.7140   -1.1400 C   0  0  0  0  0  0  0  0  0  0  0  0
    0.0010    1.1040   -0.5310 C   0  0  0  0  0  0  0  0  0  0  0  0
   -0.6470    1.0870    0.7070 C   0  0  0  0  0  0  0  0  0  0  0  0
   -0.9430    2.2870    1.3340 C   0  0  0  0  0  0  0  0  0  0  0  0
   -1.5530    2.4210    2.5450 O   0  0  0  0  0  0  0  0  0  0  0  0
   -2.3220    1.2930    2.9710 C   0  0  0  0  0  0  0  0  0  0  0  0
   -0.5830    3.5060    0.7220 C   0  0  0  0  0  0  0  0  0  0  0  0
   -0.8380    4.7150    1.3000 O   0  0  0  0  0  0  0  0  0  0  0  0
    0.0500    3.5230   -0.5150 C   0  0  0  0  0  0  0  0  0  0  0  0
    0.3300    2.3090   -1.1450 C   0  0  0  0  0  0  0  0  0  0  0  0
   -4.0120   -2.8660    1.5930 O   0  5  0  0  0  0  0  0  0  0  0  0
   -3.0060   -2.9470   -0.8630 H   0  0  0  0  0  0  0  0  0  0  0  0
   -2.0850   -3.9370    0.2890 H   0  0  0  0  0  0  0  0  0  0  0  0
   -2.5060    2.2210   -3.3940 H   0  0  0  0  0  0  0  0  0  0  0  0
   -3.7720    1.0760   -2.7990 H   0  0  0  0  0  0  0  0  0  0  0  0
   -2.8270    0.6710   -4.2720 H   0  0  0  0  0  0  0  0  0  0  0  0
    5.5240   -1.3080    1.3360 H   0  0  0  0  0  0  0  0  0  0  0  0
    6.4400    0.6210    0.0840 H   0  0  0  0  0  0  0  0  0  0  0  0
    5.0170    1.9030   -1.4750 H   0  0  0  0  0  0  0  0  0  0  0  0
    2.6390    1.2880   -1.8210 H   0  0  0  0  0  0  0  0  0  0  0  0
   -0.9630    0.1280    1.1530 H   0  0  0  0  0  0  0  0  0  0  0  0
   -2.8630    1.6850    3.8330 H   0  0  0  0  0  0  0  0  0  0  0  0
   -1.6590    0.4640    3.2500 H   0  0  0  0  0  0  0  0  0  0  0  0
   -3.0100    0.9500    2.1820 H   0  0  0  0  0  0  0  0  0  0  0  0
   -1.3560    4.5990    2.1360 H   0  0  0  0  0  0  0  0  0  0  0  0
    0.3050    4.4690   -0.9780 H   0  0  0  0  0  0  0  0  0  0  0  0
    0.7820    2.3180   -2.1330 H   0  0  0  0  0  0  0  0  0  0  0  0
  1  2  1  0  0  0  0
  2  3  1  0  0  0  0
  2 31  1  0  0  0  0
  3  4  1  0  0  0  0
  3 32  1  0  0  0  0
  3 33  1  0  0  0  0
  4  5  2  0  0  0  0
  4 17  1  0  0  0  0
  5  6  1  0  0  0  0
  5 10  1  0  0  0  0
  6  7  1  0  0  0  0
  6  9  2  0  0  0  0
  7  8  1  0  0  0  0
  8 34  1  0  0  0  0
  8 35  1  0  0  0  0
  8 36  1  0  0  0  0
 10 11  1  6  0  0  0
 10 12  1  0  0  0  0
 10 22  1  0  0  0  0
 12 13  1  0  0  0  0
 12 16  1  0  0  0  0
 13 14  2  0  0  0  0
 13 21  1  0  0  0  0
 14 15  1  0  0  0  0
 14 18  1  0  0  0  0
 15 16  1  0  0  0  0
 16 17  2  0  0  0  0
 18 19  2  0  0  0  0
 18 37  1  0  0  0  0
 19 20  1  0  0  0  0
 19 38  1  0  0  0  0
 20 21  2  0  0  0  0
 20 39  1  0  0  0  0
 21 40  1  0  0  0  0
 22 23  2  0  0  0  0
 22 30  1  0  0  0  0
 23 24  1  0  0  0  0
 23 41  1  0  0  0  0
 24 25  1  0  0  0  0
 24 27  2  0  0  0  0
 25 26  1  0  0  0  0
 26 42  1  0  0  0  0
 26 43  1  0  0  0  0
 26 44  1  0  0  0  0
 27 28  1  0  0  0  0
 27 29  1  0  0  0  0
 28 45  1  0  0  0  0
 29 30  2  0  0  0  0
 29 46  1  0  0  0  0
 30 47  1  0  0  0  0
M  CHG  2   1  -1  31  -1
M  END
$$$$
RDB08
 OpenBabel09302314563D

 46 49  0  0  1  0  0  0  0  0999 V2000
   -3.5390   -0.5080    0.3510 O   0  5  0  0  0  0  0  0  0  0  0  0
   -3.3220   -1.6960    0.6060 C   0  0  0  0  0  3  0  0  0  0  0  0
   -2.4710   -2.4650   -0.5130 C   0  0  0  0  0  0  0  0  0  0  0  0
   -1.2130   -1.7290   -0.6800 C   0  0  0  0  0  0  0  0  0  0  0  0
   -1.1180   -0.4490   -1.1390 C   0  0  0  0  0  0  0  0  0  0  0  0
   -2.3130    0.2490   -1.6270 C   0  0  0  0  0  0  0  0  0  0  0  0
   -2.3070    1.5510   -1.2010 O   0  0  0  0  0  0  0  0  0  0  0  0
   -3.5720    2.1960   -1.2810 C   0  0  0  0  0  0  0  0  0  0  0  0
   -3.1260   -0.1540   -2.4240 O   0  0  0  0  0  0  0  0  0  0  0  0
    0.1460    0.3680   -1.0680 C   0  0  2  0  0  0  0  0  0  0  0  0
    0.3340    0.8510   -2.0700 H   0  0  0  0  0  0  0  0  0  0  0  0
    1.3090   -0.5180   -0.8040 N   0  0  0  0  0  0  0  0  0  0  0  0
    2.6120   -0.0540   -0.6230 C   0  0  0  0  0  0  0  0  0  0  0  0
    3.4910   -1.0340   -0.0970 C   0  0  0  0  0  0  0  0  0  0  0  0
    2.6360   -2.5380    0.2530 S   0  0  0  0  0  0  0  0  0  0  0  0
    1.0780   -1.8120   -0.2930 C   0  0  0  0  0  0  0  0  0  0  0  0
   -0.0530   -2.4290   -0.2660 N   0  0  0  0  0  0  0  0  0  0  0  0
    4.8300   -0.7520    0.0960 C   0  0  0  0  0  0  0  0  0  0  0  0
    5.3060    0.5190   -0.2350 C   0  0  0  0  0  0  0  0  0  0  0  0
    4.4410    1.4870   -0.7500 C   0  0  0  0  0  0  0  0  0  0  0  0
    3.0920    1.2170   -0.9520 C   0  0  0  0  0  0  0  0  0  0  0  0
    0.0250    1.4240    0.0080 C   0  0  0  0  0  0  0  0  0  0  0  0
   -0.2070    1.0680    1.3480 C   0  0  0  0  0  0  0  0  0  0  0  0
   -0.1410   -0.2590    1.6180 O   0  0  0  0  0  0  0  0  0  0  0  0
   -1.0950   -0.7460    2.5640 C   0  0  0  0  0  0  0  0  0  0  0  0
   -0.4010    2.0390    2.3350 C   0  0  0  0  0  0  0  0  0  0  0  0
   -0.3430    3.3810    1.9780 C   0  0  0  0  0  0  0  0  0  0  0  0
   -0.1070    3.7530    0.6550 C   0  0  0  0  0  0  0  0  0  0  0  0
    0.0610    2.7740   -0.3250 C   0  0  0  0  0  0  0  0  0  0  0  0
   -3.6330   -2.3690    1.5860 O   0  5  0  0  0  0  0  0  0  0  0  0
   -3.1010   -2.4570   -1.4190 H   0  0  0  0  0  0  0  0  0  0  0  0
   -2.3350   -3.5100   -0.1940 H   0  0  0  0  0  0  0  0  0  0  0  0
   -3.3980    3.1520   -0.7820 H   0  0  0  0  0  0  0  0  0  0  0  0
   -4.3160    1.5950   -0.7360 H   0  0  0  0  0  0  0  0  0  0  0  0
   -3.8670    2.3220   -2.3250 H   0  0  0  0  0  0  0  0  0  0  0  0
    5.5120   -1.4970    0.5030 H   0  0  0  0  0  0  0  0  0  0  0  0
    6.3530    0.7560   -0.0850 H   0  0  0  0  0  0  0  0  0  0  0  0
    4.8290    2.4750   -0.9940 H   0  0  0  0  0  0  0  0  0  0  0  0
    2.4220    1.9800   -1.3390 H   0  0  0  0  0  0  0  0  0  0  0  0
   -1.1570   -1.8180    2.3090 H   0  0  0  0  0  0  0  0  0  0  0  0
   -2.0910   -0.3040    2.4010 H   0  0  0  0  0  0  0  0  0  0  0  0
   -0.7260   -0.5870    3.5750 H   0  0  0  0  0  0  0  0  0  0  0  0
   -0.6020    1.7420    3.3580 H   0  0  0  0  0  0  0  0  0  0  0  0
   -0.4890    4.1470    2.7350 H   0  0  0  0  0  0  0  0  0  0  0  0
   -0.0740    4.8000    0.3820 H   0  0  0  0  0  0  0  0  0  0  0  0
    0.1900    3.0720   -1.3640 H   0  0  0  0  0  0  0  0  0  0  0  0
  1  2  1  0  0  0  0
  2  3  1  0  0  0  0
  2 30  1  0  0  0  0
  3  4  1  0  0  0  0
  3 31  1  0  0  0  0
  3 32  1  0  0  0  0
  4  5  2  0  0  0  0
  4 17  1  0  0  0  0
  5  6  1  0  0  0  0
  5 10  1  0  0  0  0
  6  7  1  0  0  0  0
  6  9  2  0  0  0  0
  7  8  1  0  0  0  0
  8 33  1  0  0  0  0
  8 34  1  0  0  0  0
  8 35  1  0  0  0  0
 10 11  1  6  0  0  0
 10 12  1  0  0  0  0
 10 22  1  0  0  0  0
 12 13  1  0  0  0  0
 12 16  1  0  0  0  0
 13 14  2  0  0  0  0
 13 21  1  0  0  0  0
 14 15  1  0  0  0  0
 14 18  1  0  0  0  0
 15 16  1  0  0  0  0
 16 17  2  0  0  0  0
 18 19  2  0  0  0  0
 18 36  1  0  0  0  0
 19 20  1  0  0  0  0
 19 37  1  0  0  0  0
 20 21  2  0  0  0  0
 20 38  1  0  0  0  0
 21 39  1  0  0  0  0
 22 23  2  0  0  0  0
 22 29  1  0  0  0  0
 23 24  1  0  0  0  0
 23 26  1  0  0  0  0
 24 25  1  0  0  0  0
 25 40  1  0  0  0  0
 25 41  1  0  0  0  0
 25 42  1  0  0  0  0
 26 27  2  0  0  0  0
 26 43  1  0  0  0  0
 27 28  1  0  0  0  0
 27 44  1  0  0  0  0
 28 29  2  0  0  0  0
 28 45  1  0  0  0  0
 29 46  1  0  0  0  0
M  CHG  2   1  -1  30  -1
M  END
$$$$
RDB09
 OpenBabel09302314563D

 50 53  0  0  1  0  0  0  0  0999 V2000
   -2.1620   -2.4290    1.7650 O   0  5  0  0  0  0  0  0  0  0  0  0
   -2.6050   -3.3530    1.0920 C   0  0  0  0  0  3  0  0  0  0  0  0
   -2.0210   -3.4380   -0.4360 C   0  0  0  0  0  0  0  0  0  0  0  0
   -0.9380   -2.4770   -0.5860 C   0  0  0  0  0  0  0  0  0  0  0  0
   -1.0290   -1.1760   -1.0190 C   0  0  0  0  0  0  0  0  0  0  0  0
   -2.2340   -0.6400   -1.6190 C   0  0  0  0  0  0  0  0  0  0  0  0
   -2.2840    0.7210   -1.4340 O   0  0  0  0  0  0  0  0  0  0  0  0
   -3.4330    1.3690   -1.9550 C   0  0  0  0  0  0  0  0  0  0  0  0
   -3.0950   -1.1930   -2.2630 O   0  0  0  0  0  0  0  0  0  0  0  0
    0.0750   -0.1630   -0.8070 C   0  0  2  0  0  0  0  0  0  0  0  0
    0.2240    0.4450   -1.7450 H   0  0  0  0  0  0  0  0  0  0  0  0
    1.3600   -0.8550   -0.5300 N   0  0  0  0  0  0  0  0  0  0  0  0
    2.5990   -0.2330   -0.3980 C   0  0  0  0  0  0  0  0  0  0  0  0
    3.6230   -1.1110    0.0430 C   0  0  0  0  0  0  0  0  0  0  0  0
    2.9970   -2.7370    0.3190 S   0  0  0  0  0  0  0  0  0  0  0  0
    1.3450   -2.2100   -0.1660 C   0  0  0  0  0  0  0  0  0  0  0  0
    0.3230   -2.9950   -0.2010 N   0  0  0  0  0  0  0  0  0  0  0  0
    4.9200   -0.6610    0.2080 C   0  0  0  0  0  0  0  0  0  0  0  0
    5.2100    0.6750   -0.0710 C   0  0  0  0  0  0  0  0  0  0  0  0
    4.2060    1.5410   -0.5130 C   0  0  0  0  0  0  0  0  0  0  0  0
    2.8980    1.1010   -0.6850 C   0  0  0  0  0  0  0  0  0  0  0  0
   -0.2890    0.7300    0.3630 C   0  0  0  0  0  0  0  0  0  0  0  0
   -0.3780    2.1210    0.2050 C   0  0  0  0  0  0  0  0  0  0  0  0
   -0.1500    2.5890   -1.0580 O   0  0  0  0  0  0  0  0  0  0  0  0
    0.5190    3.8430   -1.1470 C   0  0  0  0  0  0  0  0  0  0  0  0
   -0.7770    2.9160    1.2850 C   0  0  0  0  0  0  0  0  0  0  0  0
   -0.8510    4.2900    1.1590 O   0  0  0  0  0  0  0  0  0  0  0  0
   -2.1440    4.6900    0.7090 C   0  0  0  0  0  0  0  0  0  0  0  0
   -1.0580    2.3500    2.5270 C   0  0  0  0  0  0  0  0  0  0  0  0
   -0.9730    0.9700    2.6780 C   0  0  0  0  0  0  0  0  0  0  0  0
   -0.6160    0.1660    1.5960 C   0  0  0  0  0  0  0  0  0  0  0  0
   -3.4140   -4.2390    1.3340 O   0  5  0  0  0  0  0  0  0  0  0  0
   -2.8950   -3.2690   -1.0780 H   0  0  0  0  0  0  0  0  0  0  0  0
   -1.7110   -4.4870   -0.5540 H   0  0  0  0  0  0  0  0  0  0  0  0
   -3.2590    2.4190   -1.7010 H   0  0  0  0  0  0  0  0  0  0  0  0
   -4.3330    0.9800   -1.4670 H   0  0  0  0  0  0  0  0  0  0  0  0
   -3.4950    1.2260   -3.0370 H   0  0  0  0  0  0  0  0  0  0  0  0
    5.7090   -1.3270    0.5500 H   0  0  0  0  0  0  0  0  0  0  0  0
    6.2210    1.0440    0.0580 H   0  0  0  0  0  0  0  0  0  0  0  0
    4.4520    2.5800   -0.7250 H   0  0  0  0  0  0  0  0  0  0  0  0
    2.1220    1.7780   -1.0320 H   0  0  0  0  0  0  0  0  0  0  0  0
   -0.2290    4.6390   -1.2020 H   0  0  0  0  0  0  0  0  0  0  0  0
    1.0670    3.7620   -2.0930 H   0  0  0  0  0  0  0  0  0  0  0  0
    1.1990    4.0210   -0.3100 H   0  0  0  0  0  0  0  0  0  0  0  0
   -2.0530    5.7740    0.6070 H   0  0  0  0  0  0  0  0  0  0  0  0
   -2.9010    4.4290    1.4550 H   0  0  0  0  0  0  0  0  0  0  0  0
   -2.3770    4.2190   -0.2540 H   0  0  0  0  0  0  0  0  0  0  0  0
   -1.3550    2.9900    3.3520 H   0  0  0  0  0  0  0  0  0  0  0  0
   -1.2200    0.5010    3.6290 H   0  0  0  0  0  0  0  0  0  0  0  0
   -0.6380   -0.9330    1.7100 H   0  0  0  0  0  0  0  0  0  0  0  0
  1  2  1  0  0  0  0
  2  3  1  0  0  0  0
  2 32  1  0  0  0  0
  3  4  1  0  0  0  0
  3 33  1  0  0  0  0
  3 34  1  0  0  0  0
  4  5  2  0  0  0  0
  4 17  1  0  0  0  0
  5  6  1  0  0  0  0
  5 10  1  0  0  0  0
  6  7  1  0  0  0  0
  6  9  2  0  0  0  0
  7  8  1  0  0  0  0
  8 35  1  0  0  0  0
  8 36  1  0  0  0  0
  8 37  1  0  0  0  0
 10 11  1  6  0  0  0
 10 12  1  0  0  0  0
 10 22  1  0  0  0  0
 12 13  1  0  0  0  0
 12 16  1  0  0  0  0
 13 14  2  0  0  0  0
 13 21  1  0  0  0  0
 14 15  1  0  0  0  0
 14 18  1  0  0  0  0
 15 16  1  0  0  0  0
 16 17  2  0  0  0  0
 18 19  2  0  0  0  0
 18 38  1  0  0  0  0
 19 20  1  0  0  0  0
 19 39  1  0  0  0  0
 20 21  2  0  0  0  0
 20 40  1  0  0  0  0
 21 41  1  0  0  0  0
 22 23  2  0  0  0  0
 22 31  1  0  0  0  0
 23 24  1  0  0  0  0
 23 26  1  0  0  0  0
 24 25  1  0  0  0  0
 25 42  1  0  0  0  0
 25 43  1  0  0  0  0
 25 44  1  0  0  0  0
 26 27  1  0  0  0  0
 26 29  2  0  0  0  0
 27 28  1  0  0  0  0
 28 45  1  0  0  0  0
 28 46  1  0  0  0  0
 28 47  1  0  0  0  0
 29 30  1  0  0  0  0
 29 48  1  0  0  0  0
 30 31  2  0  0  0  0
 30 49  1  0  0  0  0
 31 50  1  0  0  0  0
M  CHG  2   1  -1  32  -1
M  END
$$$$
RDB10
 OpenBabel09302314563D

 50 53  0  0  1  0  0  0  0  0999 V2000
    5.2170    1.2370    1.6480 O   0  5  0  0  0  0  0  0  0  0  0  0
    4.0740    0.9760    1.2960 C   0  0  0  0  0  3  0  0  0  0  0  0
    3.6320    1.7810   -0.0530 C   0  0  0  0  0  0  0  0  0  0  0  0
    2.2030    1.6040   -0.2810 C   0  0  0  0  0  0  0  0  0  0  0  0
    1.5940    0.5990   -0.9920 C   0  0  0  0  0  0  0  0  0  0  0  0
    2.3500   -0.3610   -1.7730 C   0  0  0  0  0  0  0  0  0  0  0  0
    1.6820   -1.5610   -1.8250 O   0  0  0  0  0  0  0  0  0  0  0  0
    2.3670   -2.6100   -2.4900 C   0  0  0  0  0  0  0  0  0  0  0  0
    3.3830   -0.2200   -2.3840 O   0  0  0  0  0  0  0  0  0  0  0  0
    0.1050    0.3370   -0.9390 C   0  0  2  0  0  0  0  0  0  0  0  0
   -0.2760    0.1300   -1.9790 H   0  0  0  0  0  0  0  0  0  0  0  0
   -0.6020    1.5560   -0.4560 N   0  0  0  0  0  0  0  0  0  0  0  0
   -1.9860    1.7190   -0.4000 C   0  0  0  0  0  0  0  0  0  0  0  0
   -2.3890    2.8450    0.3640 C   0  0  0  0  0  0  0  0  0  0  0  0
   -0.9970    3.6960    1.0360 S   0  0  0  0  0  0  0  0  0  0  0  0
    0.1240    2.5130    0.2700 C   0  0  0  0  0  0  0  0  0  0  0  0
    1.4090    2.5920    0.3500 N   0  0  0  0  0  0  0  0  0  0  0  0
   -3.7260    3.1640    0.5060 C   0  0  0  0  0  0  0  0  0  0  0  0
   -4.6810    2.3660   -0.1240 C   0  0  0  0  0  0  0  0  0  0  0  0
   -4.2880    1.2680   -0.8940 C   0  0  0  0  0  0  0  0  0  0  0  0
   -2.9470    0.9360   -1.0460 C   0  0  0  0  0  0  0  0  0  0  0  0
   -0.1910   -0.8210   -0.0160 C   0  0  0  0  0  0  0  0  0  0  0  0
   -1.0440   -1.8620   -0.4090 C   0  0  0  0  0  0  0  0  0  0  0  0
   -1.5520   -1.7160   -1.6650 O   0  0  0  0  0  0  0  0  0  0  0  0
   -2.3000   -2.7940   -2.2020 C   0  0  0  0  0  0  0  0  0  0  0  0
   -1.3470   -2.9380    0.4280 C   0  0  0  0  0  0  0  0  0  0  0  0
   -0.7360   -2.9590    1.6830 C   0  0  0  0  0  0  0  0  0  0  0  0
   -0.9310   -3.9280    2.6230 O   0  0  0  0  0  0  0  0  0  0  0  0
   -1.7770   -5.0110    2.2740 C   0  0  0  0  0  0  0  0  0  0  0  0
    0.1550   -1.9640    2.0970 C   0  0  0  0  0  0  0  0  0  0  0  0
    0.4280   -0.9090    1.2340 C   0  0  0  0  0  0  0  0  0  0  0  0
    3.2190    0.2280    1.7570 O   0  5  0  0  0  0  0  0  0  0  0  0
    4.2840    1.3830   -0.8420 H   0  0  0  0  0  0  0  0  0  0  0  0
    3.9270    2.8250    0.1340 H   0  0  0  0  0  0  0  0  0  0  0  0
    1.6960   -3.4640   -2.3640 H   0  0  0  0  0  0  0  0  0  0  0  0
    3.3340   -2.7900   -2.0060 H   0  0  0  0  0  0  0  0  0  0  0  0
    2.5100   -2.3620   -3.5450 H   0  0  0  0  0  0  0  0  0  0  0  0
   -4.0420    4.0210    1.0980 H   0  0  0  0  0  0  0  0  0  0  0  0
   -5.7340    2.5990   -0.0170 H   0  0  0  0  0  0  0  0  0  0  0  0
   -5.0460    0.6590   -1.3830 H   0  0  0  0  0  0  0  0  0  0  0  0
   -2.6510    0.0840   -1.6550 H   0  0  0  0  0  0  0  0  0  0  0  0
   -2.5020   -2.4510   -3.2250 H   0  0  0  0  0  0  0  0  0  0  0  0
   -3.2320   -2.9340   -1.6480 H   0  0  0  0  0  0  0  0  0  0  0  0
   -1.7040   -3.7120   -2.2200 H   0  0  0  0  0  0  0  0  0  0  0  0
   -2.0190   -3.7170    0.1170 H   0  0  0  0  0  0  0  0  0  0  0  0
   -1.7450   -5.6360    3.1750 H   0  0  0  0  0  0  0  0  0  0  0  0
   -1.3770   -5.5590    1.4160 H   0  0  0  0  0  0  0  0  0  0  0  0
   -2.7970   -4.6640    2.0860 H   0  0  0  0  0  0  0  0  0  0  0  0
    0.6500   -2.0260    3.0630 H   0  0  0  0  0  0  0  0  0  0  0  0
    1.1770   -0.1460    1.5330 H   0  0  0  0  0  0  0  0  0  0  0  0
  1  2  1  0  0  0  0
  2  3  1  0  0  0  0
  2 32  1  0  0  0  0
  3  4  1  0  0  0  0
  3 33  1  0  0  0  0
  3 34  1  0  0  0  0
  4  5  2  0  0  0  0
  4 17  1  0  0  0  0
  5  6  1  0  0  0  0
  5 10  1  0  0  0  0
  6  7  1  0  0  0  0
  6  9  2  0  0  0  0
  7  8  1  0  0  0  0
  8 35  1  0  0  0  0
  8 36  1  0  0  0  0
  8 37  1  0  0  0  0
 10 11  1  6  0  0  0
 10 12  1  0  0  0  0
 10 22  1  0  0  0  0
 12 13  1  0  0  0  0
 12 16  1  0  0  0  0
 13 14  2  0  0  0  0
 13 21  1  0  0  0  0
 14 15  1  0  0  0  0
 14 18  1  0  0  0  0
 15 16  1  0  0  0  0
 16 17  2  0  0  0  0
 18 19  2  0  0  0  0
 18 38  1  0  0  0  0
 19 20  1  0  0  0  0
 19 39  1  0  0  0  0
 20 21  2  0  0  0  0
 20 40  1  0  0  0  0
 21 41  1  0  0  0  0
 22 23  2  0  0  0  0
 22 31  1  0  0  0  0
 23 24  1  0  0  0  0
 23 26  1  0  0  0  0
 24 25  1  0  0  0  0
 25 42  1  0  0  0  0
 25 43  1  0  0  0  0
 25 44  1  0  0  0  0
 26 27  2  0  0  0  0
 26 45  1  0  0  0  0
 27 28  1  0  0  0  0
 27 30  1  0  0  0  0
 28 29  1  0  0  0  0
 29 46  1  0  0  0  0
 29 47  1  0  0  0  0
 29 48  1  0  0  0  0
 30 31  2  0  0  0  0
 30 49  1  0  0  0  0
 31 50  1  0  0  0  0
M  CHG  2   1  -1  32  -1
M  END
$$$$
RDB11
 OpenBabel09302314563D

 50 53  0  0  1  0  0  0  0  0999 V2000
    4.0380    1.6450   -0.6190 O   0  5  0  0  0  0  0  0  0  0  0  0
    4.4630    1.2390    0.4610 C   0  0  0  0  0  3  0  0  0  0  0  0
    3.4240    0.3360    1.3130 C   0  0  0  0  0  0  0  0  0  0  0  0
    2.0700    0.4490    0.7730 C   0  0  0  0  0  0  0  0  0  0  0  0
    1.5050   -0.3930   -0.1400 C   0  0  0  0  0  0  0  0  0  0  0  0
    2.1870   -1.5830   -0.6540 C   0  0  0  0  0  0  0  0  0  0  0  0
    2.6230   -1.5820   -1.9490 O   0  0  0  0  0  0  0  0  0  0  0  0
    2.7780   -0.3280   -2.6000 C   0  0  0  0  0  0  0  0  0  0  0  0
    2.3310   -2.6280   -0.0680 O   0  0  0  0  0  0  0  0  0  0  0  0
    0.1080   -0.2170   -0.6730 C   0  0  2  0  0  0  0  0  0  0  0  0
    0.1080   -0.3300   -1.7970 H   0  0  0  0  0  0  0  0  0  0  0  0
   -0.3790    1.1460   -0.3710 N   0  0  0  0  0  0  0  0  0  0  0  0
   -1.6160    1.6440   -0.7840 C   0  0  0  0  0  0  0  0  0  0  0  0
   -2.0020    2.8200   -0.0950 C   0  0  0  0  0  0  0  0  0  0  0  0
   -0.8030    3.2760    1.1190 S   0  0  0  0  0  0  0  0  0  0  0  0
    0.2120    1.8500    0.6960 C   0  0  0  0  0  0  0  0  0  0  0  0
    1.3250    1.5480    1.2740 N   0  0  0  0  0  0  0  0  0  0  0  0
   -3.1900    3.4560   -0.4020 C   0  0  0  0  0  0  0  0  0  0  0  0
   -4.0050    2.9170   -1.3990 C   0  0  0  0  0  0  0  0  0  0  0  0
   -3.6250    1.7550   -2.0770 C   0  0  0  0  0  0  0  0  0  0  0  0
   -2.4310    1.1050   -1.7830 C   0  0  0  0  0  0  0  0  0  0  0  0
   -0.8200   -1.2330   -0.0280 C   0  0  0  0  0  0  0  0  0  0  0  0
   -1.5170   -2.1730   -0.7860 C   0  0  0  0  0  0  0  0  0  0  0  0
   -1.4130   -2.1550   -2.1600 O   0  0  0  0  0  0  0  0  0  0  0  0
   -0.4110   -3.0540   -2.6340 C   0  0  0  0  0  0  0  0  0  0  0  0
   -2.4010   -3.0850   -0.2020 C   0  0  0  0  0  0  0  0  0  0  0  0
   -2.5890   -3.0680    1.1720 C   0  0  0  0  0  0  0  0  0  0  0  0
   -1.8670   -2.1400    1.9390 C   0  0  0  0  0  0  0  0  0  0  0  0
   -2.1270   -2.2240    3.2750 O   0  0  0  0  0  0  0  0  0  0  0  0
   -1.3270   -1.4120    4.1260 C   0  0  0  0  0  0  0  0  0  0  0  0
   -0.9920   -1.2270    1.3560 C   0  0  0  0  0  0  0  0  0  0  0  0
    5.5490    1.3740    1.0120 O   0  5  0  0  0  0  0  0  0  0  0  0
    3.5110    0.7050    2.3480 H   0  0  0  0  0  0  0  0  0  0  0  0
    3.8290   -0.6860    1.2790 H   0  0  0  0  0  0  0  0  0  0  0  0
    3.5140   -0.5410   -3.3800 H   0  0  0  0  0  0  0  0  0  0  0  0
    3.1830    0.4440   -1.9100 H   0  0  0  0  0  0  0  0  0  0  0  0
    1.8230   -0.0120   -3.0190 H   0  0  0  0  0  0  0  0  0  0  0  0
   -3.4970    4.3610    0.1190 H   0  0  0  0  0  0  0  0  0  0  0  0
   -4.9410    3.4040   -1.6490 H   0  0  0  0  0  0  0  0  0  0  0  0
   -4.2770    1.3480   -2.8490 H   0  0  0  0  0  0  0  0  0  0  0  0
   -2.1450    0.1960   -2.3090 H   0  0  0  0  0  0  0  0  0  0  0  0
   -0.3000   -2.7680   -3.6840 H   0  0  0  0  0  0  0  0  0  0  0  0
   -0.7630   -4.0830   -2.5370 H   0  0  0  0  0  0  0  0  0  0  0  0
    0.5370   -2.9230   -2.0950 H   0  0  0  0  0  0  0  0  0  0  0  0
   -2.9320   -3.7940   -0.8310 H   0  0  0  0  0  0  0  0  0  0  0  0
   -3.2700   -3.7590    1.6570 H   0  0  0  0  0  0  0  0  0  0  0  0
   -1.6650   -1.7130    5.1240 H   0  0  0  0  0  0  0  0  0  0  0  0
   -1.5330   -0.3510    3.9530 H   0  0  0  0  0  0  0  0  0  0  0  0
   -0.2610   -1.6380    3.9970 H   0  0  0  0  0  0  0  0  0  0  0  0
   -0.4250   -0.5220    1.9610 H   0  0  0  0  0  0  0  0  0  0  0  0
  1  2  1  0  0  0  0
  2  3  1  0  0  0  0
  2 32  1  0  0  0  0
  3  4  1  0  0  0  0
  3 33  1  0  0  0  0
  3 34  1  0  0  0  0
  4  5  2  0  0  0  0
  4 17  1  0  0  0  0
  5  6  1  0  0  0  0
  5 10  1  0  0  0  0
  6  7  1  0  0  0  0
  6  9  2  0  0  0  0
  7  8  1  0  0  0  0
  8 35  1  0  0  0  0
  8 36  1  0  0  0  0
  8 37  1  0  0  0  0
 10 11  1  6  0  0  0
 10 12  1  0  0  0  0
 10 22  1  0  0  0  0
 12 13  1  0  0  0  0
 12 16  1  0  0  0  0
 13 14  2  0  0  0  0
 13 21  1  0  0  0  0
 14 15  1  0  0  0  0
 14 18  1  0  0  0  0
 15 16  1  0  0  0  0
 16 17  2  0  0  0  0
 18 19  2  0  0  0  0
 18 38  1  0  0  0  0
 19 20  1  0  0  0  0
 19 39  1  0  0  0  0
 20 21  2  0  0  0  0
 20 40  1  0  0  0  0
 21 41  1  0  0  0  0
 22 23  2  0  0  0  0
 22 31  1  0  0  0  0
 23 24  1  0  0  0  0
 23 26  1  0  0  0  0
 24 25  1  0  0  0  0
 25 42  1  0  0  0  0
 25 43  1  0  0  0  0
 25 44  1  0  0  0  0
 26 27  2  0  0  0  0
 26 45  1  0  0  0  0
 27 28  1  0  0  0  0
 27 46  1  0  0  0  0
 28 29  1  0  0  0  0
 28 31  2  0  0  0  0
 29 30  1  0  0  0  0
 30 47  1  0  0  0  0
 30 48  1  0  0  0  0
 30 49  1  0  0  0  0
 31 50  1  0  0  0  0
M  CHG  2   1  -1  32  -1
M  END
$$$$
RDB12
 OpenBabel09302314563D

 46 49  0  0  1  0  0  0  0  0999 V2000
   -4.1650   -0.2240    0.7600 O   0  5  0  0  0  0  0  0  0  0  0  0
   -4.5960    0.4000   -0.2150 C   0  0  0  0  0  3  0  0  0  0  0  0
   -3.5550    0.5270   -1.4360 C   0  0  0  0  0  0  0  0  0  0  0  0
   -2.2020    0.7000   -0.9040 C   0  0  0  0  0  0  0  0  0  0  0  0
   -1.5760   -0.1830   -0.0770 C   0  0  0  0  0  0  0  0  0  0  0  0
   -2.2300   -1.4510    0.2720 C   0  0  0  0  0  0  0  0  0  0  0  0
   -1.9920   -1.7570    1.5910 O   0  0  0  0  0  0  0  0  0  0  0  0
   -2.8710   -2.7390    2.1230 C   0  0  0  0  0  0  0  0  0  0  0  0
   -2.7580   -2.2400   -0.4730 O   0  0  0  0  0  0  0  0  0  0  0  0
   -0.2570    0.0800    0.5950 C   0  0  2  0  0  0  0  0  0  0  0  0
   -0.4130    0.0960    1.7170 H   0  0  0  0  0  0  0  0  0  0  0  0
    0.2550    1.4220    0.2260 N   0  0  0  0  0  0  0  0  0  0  0  0
    1.4830    1.9370    0.6310 C   0  0  0  0  0  0  0  0  0  0  0  0
    1.8050    3.1700    0.0120 C   0  0  0  0  0  0  0  0  0  0  0  0
    0.5410    3.6680   -1.1160 S   0  0  0  0  0  0  0  0  0  0  0  0
   -0.4180    2.1870   -0.7450 C   0  0  0  0  0  0  0  0  0  0  0  0
   -1.5520    1.9030   -1.2830 N   0  0  0  0  0  0  0  0  0  0  0  0
    2.9860    3.8240    0.3130 C   0  0  0  0  0  0  0  0  0  0  0  0
    3.8570    3.2480    1.2390 C   0  0  0  0  0  0  0  0  0  0  0  0
    3.5400    2.0330    1.8520 C   0  0  0  0  0  0  0  0  0  0  0  0
    2.3560    1.3640    1.5620 C   0  0  0  0  0  0  0  0  0  0  0  0
    0.7410   -0.9930    0.2110 C   0  0  0  0  0  0  0  0  0  0  0  0
    1.0460   -1.9960    1.1370 C   0  0  0  0  0  0  0  0  0  0  0  0
    1.9600   -2.9900    0.8200 C   0  0  0  0  0  0  0  0  0  0  0  0
    2.5590   -2.9690   -0.4490 C   0  0  0  0  0  0  0  0  0  0  0  0
    3.4580   -3.9820   -0.6270 O   0  0  0  0  0  0  0  0  0  0  0  0
    4.0290   -4.1140   -1.9190 C   0  0  0  0  0  0  0  0  0  0  0  0
    2.2480   -1.9950   -1.3950 C   0  0  0  0  0  0  0  0  0  0  0  0
    1.3230   -1.0100   -1.0540 C   0  0  0  0  0  0  0  0  0  0  0  0
   -5.6870    0.9190   -0.4200 O   0  5  0  0  0  0  0  0  0  0  0  0
   -3.8880    1.3520   -2.0830 H   0  0  0  0  0  0  0  0  0  0  0  0
   -3.6810   -0.4190   -1.9920 H   0  0  0  0  0  0  0  0  0  0  0  0
   -2.6930   -3.7030    1.6410 H   0  0  0  0  0  0  0  0  0  0  0  0
   -3.9110   -2.4130    1.9620 H   0  0  0  0  0  0  0  0  0  0  0  0
   -2.6220   -2.7560    3.1850 H   0  0  0  0  0  0  0  0  0  0  0  0
    3.2430    4.7710   -0.1560 H   0  0  0  0  0  0  0  0  0  0  0  0
    4.7880    3.7480    1.4840 H   0  0  0  0  0  0  0  0  0  0  0  0
    4.2350    1.5990    2.5700 H   0  0  0  0  0  0  0  0  0  0  0  0
    2.1180    0.4140    2.0350 H   0  0  0  0  0  0  0  0  0  0  0  0
    0.5400   -2.0100    2.1060 H   0  0  0  0  0  0  0  0  0  0  0  0
    2.2060   -3.7760    1.5240 H   0  0  0  0  0  0  0  0  0  0  0  0
    4.6560   -5.0070   -1.8110 H   0  0  0  0  0  0  0  0  0  0  0  0
    4.6420   -3.2420   -2.1630 H   0  0  0  0  0  0  0  0  0  0  0  0
    3.2520   -4.2810   -2.6740 H   0  0  0  0  0  0  0  0  0  0  0  0
    2.6990   -1.9940   -2.3780 H   0  0  0  0  0  0  0  0  0  0  0  0
    1.0490   -0.2500   -1.7890 H   0  0  0  0  0  0  0  0  0  0  0  0
  1  2  1  0  0  0  0
  2  3  1  0  0  0  0
  2 30  1  0  0  0  0
  3  4  1  0  0  0  0
  3 31  1  0  0  0  0
  3 32  1  0  0  0  0
  4  5  2  0  0  0  0
  4 17  1  0  0  0  0
  5  6  1  0  0  0  0
  5 10  1  0  0  0  0
  6  7  1  0  0  0  0
  6  9  2  0  0  0  0
  7  8  1  0  0  0  0
  8 33  1  0  0  0  0
  8 34  1  0  0  0  0
  8 35  1  0  0  0  0
 10 11  1  1  0  0  0
 10 12  1  0  0  0  0
 10 22  1  0  0  0  0
 12 13  1  0  0  0  0
 12 16  1  0  0  0  0
 13 14  2  0  0  0  0
 13 21  1  0  0  0  0
 14 15  1  0  0  0  0
 14 18  1  0  0  0  0
 15 16  1  0  0  0  0
 16 17  2  0  0  0  0
 18 19  2  0  0  0  0
 18 36  1  0  0  0  0
 19 20  1  0  0  0  0
 19 37  1  0  0  0  0
 20 21  2  0  0  0  0
 20 38  1  0  0  0  0
 21 39  1  0  0  0  0
 22 23  2  0  0  0  0
 22 29  1  0  0  0  0
 23 24  1  0  0  0  0
 23 40  1  0  0  0  0
 24 25  2  0  0  0  0
 24 41  1  0  0  0  0
 25 26  1  0  0  0  0
 25 28  1  0  0  0  0
 26 27  1  0  0  0  0
 27 42  1  0  0  0  0
 27 43  1  0  0  0  0
 27 44  1  0  0  0  0
 28 29  2  0  0  0  0
 28 45  1  0  0  0  0
 29 46  1  0  0  0  0
M  CHG  2   1  -1  30  -1
M  END
$$$$
RDB13
 OpenBabel09302314563D

 54 57  0  0  1  0  0  0  0  0999 V2000
   -3.1260    1.9960   -0.4000 O   0  5  0  0  0  0  0  0  0  0  0  0
   -2.5540    3.0140   -0.8000 C   0  0  0  0  0  3  0  0  0  0  0  0
   -1.4870    3.6090    0.2320 C   0  0  0  0  0  0  0  0  0  0  0  0
   -0.4660    2.5740    0.4440 C   0  0  0  0  0  0  0  0  0  0  0  0
   -0.6890    1.3690    1.0420 C   0  0  0  0  0  0  0  0  0  0  0  0
   -2.0170    1.0660    1.5890 C   0  0  0  0  0  0  0  0  0  0  0  0
   -2.4440   -0.1660    1.1720 O   0  0  0  0  0  0  0  0  0  0  0  0
   -3.8340   -0.4040    1.3570 C   0  0  0  0  0  0  0  0  0  0  0  0
   -2.6230    1.6930    2.4250 O   0  0  0  0  0  0  0  0  0  0  0  0
    0.3280    0.2540    1.0860 C   0  0  2  0  0  0  0  0  0  0  0  0
    0.4650   -0.0900    2.1510 H   0  0  0  0  0  0  0  0  0  0  0  0
    1.6590    0.7620    0.6530 N   0  0  0  0  0  0  0  0  0  0  0  0
    2.7940   -0.0390    0.5140 C   0  0  0  0  0  0  0  0  0  0  0  0
    3.8520    0.5990   -0.1830 C   0  0  0  0  0  0  0  0  0  0  0  0
    3.3800    2.2100   -0.7270 S   0  0  0  0  0  0  0  0  0  0  0  0
    1.7370    1.9950   -0.0200 C   0  0  0  0  0  0  0  0  0  0  0  0
    0.8080    2.8880   -0.0860 N   0  0  0  0  0  0  0  0  0  0  0  0
    5.0640   -0.0390   -0.3720 C   0  0  0  0  0  0  0  0  0  0  0  0
    5.2330   -1.3270    0.1400 C   0  0  0  0  0  0  0  0  0  0  0  0
    4.1950   -1.9560    0.8330 C   0  0  0  0  0  0  0  0  0  0  0  0
    2.9730   -1.3250    1.0320 C   0  0  0  0  0  0  0  0  0  0  0  0
   -0.1260   -0.8830    0.2110 C   0  0  0  0  0  0  0  0  0  0  0  0
   -0.4090   -0.6560   -1.1570 C   0  0  0  0  0  0  0  0  0  0  0  0
   -0.0580    0.5670   -1.6010 O   0  0  0  0  0  0  0  0  0  0  0  0
   -0.8680    1.1250   -2.6380 C   0  0  0  0  0  0  0  0  0  0  0  0
   -0.9360   -1.6520   -1.9790 C   0  0  0  0  0  0  0  0  0  0  0  0
   -1.1760   -2.9090   -1.4150 C   0  0  0  0  0  0  0  0  0  0  0  0
   -1.6750   -3.8050   -2.3120 O   0  0  0  0  0  0  0  0  0  0  0  0
   -2.0210   -5.0880   -1.8130 C   0  0  0  0  0  0  0  0  0  0  0  0
   -0.9150   -3.1880   -0.0760 C   0  0  0  0  0  0  0  0  0  0  0  0
   -0.4050   -2.1500    0.7110 C   0  0  0  0  0  0  0  0  0  0  0  0
   -0.1000   -2.4680    2.0190 O   0  0  0  0  0  0  0  0  0  0  0  0
   -1.1560   -2.1500    2.9210 C   0  0  0  0  0  0  0  0  0  0  0  0
   -2.6630    3.6190   -1.8630 O   0  5  0  0  0  0  0  0  0  0  0  0
   -2.0540    3.8440    1.1480 H   0  0  0  0  0  0  0  0  0  0  0  0
   -1.0860    4.5470   -0.1810 H   0  0  0  0  0  0  0  0  0  0  0  0
   -3.9970   -1.3490    0.8330 H   0  0  0  0  0  0  0  0  0  0  0  0
   -4.4100    0.4060    0.8830 H   0  0  0  0  0  0  0  0  0  0  0  0
   -4.0690   -0.4690    2.4200 H   0  0  0  0  0  0  0  0  0  0  0  0
    5.8770    0.4420   -0.9100 H   0  0  0  0  0  0  0  0  0  0  0  0
    6.1750   -1.8430   -0.0050 H   0  0  0  0  0  0  0  0  0  0  0  0
    4.3440   -2.9620    1.2220 H   0  0  0  0  0  0  0  0  0  0  0  0
    2.1700   -1.8240    1.5710 H   0  0  0  0  0  0  0  0  0  0  0  0
   -0.6130    2.1980   -2.5750 H   0  0  0  0  0  0  0  0  0  0  0  0
   -1.9410    1.0210   -2.4040 H   0  0  0  0  0  0  0  0  0  0  0  0
   -0.6020    0.6940   -3.6000 H   0  0  0  0  0  0  0  0  0  0  0  0
   -1.1680   -1.4590   -3.0190 H   0  0  0  0  0  0  0  0  0  0  0  0
   -2.4180   -5.5900   -2.7030 H   0  0  0  0  0  0  0  0  0  0  0  0
   -2.7920   -5.0100   -1.0400 H   0  0  0  0  0  0  0  0  0  0  0  0
   -1.1360   -5.6120   -1.4400 H   0  0  0  0  0  0  0  0  0  0  0  0
   -1.0960   -4.1520    0.3690 H   0  0  0  0  0  0  0  0  0  0  0  0
   -0.8890   -2.7070    3.8220 H   0  0  0  0  0  0  0  0  0  0  0  0
   -2.1270   -2.4690    2.5280 H   0  0  0  0  0  0  0  0  0  0  0  0
   -1.1680   -1.0680    3.1100 H   0  0  0  0  0  0  0  0  0  0  0  0
  1  2  1  0  0  0  0
  2  3  1  0  0  0  0
  2 34  1  0  0  0  0
  3  4  1  0  0  0  0
  3 35  1  0  0  0  0
  3 36  1  0  0  0  0
  4  5  2  0  0  0  0
  4 17  1  0  0  0  0
  5  6  1  0  0  0  0
  5 10  1  0  0  0  0
  6  7  1  0  0  0  0
  6  9  2  0  0  0  0
  7  8  1  0  0  0  0
  8 37  1  0  0  0  0
  8 38  1  0  0  0  0
  8 39  1  0  0  0  0
 10 11  1  1  0  0  0
 10 12  1  0  0  0  0
 10 22  1  0  0  0  0
 12 13  1  0  0  0  0
 12 16  1  0  0  0  0
 13 14  2  0  0  0  0
 13 21  1  0  0  0  0
 14 15  1  0  0  0  0
 14 18  1  0  0  0  0
 15 16  1  0  0  0  0
 16 17  2  0  0  0  0
 18 19  2  0  0  0  0
 18 40  1  0  0  0  0
 19 20  1  0  0  0  0
 19 41  1  0  0  0  0
 20 21  2  0  0  0  0
 20 42  1  0  0  0  0
 21 43  1  0  0  0  0
 22 23  2  0  0  0  0
 22 31  1  0  0  0  0
 23 24  1  0  0  0  0
 23 26  1  0  0  0  0
 24 25  1  0  0  0  0
 25 44  1  0  0  0  0
 25 45  1  0  0  0  0
 25 46  1  0  0  0  0
 26 27  2  0  0  0  0
 26 47  1  0  0  0  0
 27 28  1  0  0  0  0
 27 30  1  0  0  0  0
 28 29  1  0  0  0  0
 29 48  1  0  0  0  0
 29 49  1  0  0  0  0
 29 50  1  0  0  0  0
 30 31  2  0  0  0  0
 30 51  1  0  0  0  0
 31 32  1  0  0  0  0
 32 33  1  0  0  0  0
 33 52  1  0  0  0  0
 33 53  1  0  0  0  0
 33 54  1  0  0  0  0
M  CHG  2   1  -1  34  -1
M  END
$$$$
RDB14
 OpenBabel09302314563D

 54 57  0  0  1  0  0  0  0  0999 V2000
    1.5450   -3.1880   -0.4780 O   0  5  0  0  0  0  0  0  0  0  0  0
    0.7810   -3.9740   -1.0460 C   0  0  0  0  0  3  0  0  0  0  0  0
   -0.7050   -4.0180   -0.4310 C   0  0  0  0  0  0  0  0  0  0  0  0
   -1.1200   -2.6660   -0.0500 C   0  0  0  0  0  0  0  0  0  0  0  0
   -0.4500   -1.8660    0.8270 C   0  0  0  0  0  0  0  0  0  0  0  0
    0.7210   -2.3890    1.5430 C   0  0  0  0  0  0  0  0  0  0  0  0
    1.7000   -1.4310    1.6400 O   0  0  0  0  0  0  0  0  0  0  0  0
    2.9870   -1.9500    1.9510 C   0  0  0  0  0  0  0  0  0  0  0  0
    0.7950   -3.4270    2.1550 O   0  0  0  0  0  0  0  0  0  0  0  0
   -0.7980   -0.4220    1.0670 C   0  0  2  0  0  0  0  0  0  0  0  0
   -0.8310   -0.2230    2.1760 H   0  0  0  0  0  0  0  0  0  0  0  0
   -2.1480   -0.1300    0.5340 N   0  0  0  0  0  0  0  0  0  0  0  0
   -2.7670    1.1160    0.6150 C   0  0  0  0  0  0  0  0  0  0  0  0
   -3.9560    1.2000   -0.1520 C   0  0  0  0  0  0  0  0  0  0  0  0
   -4.2420   -0.2920   -1.0540 S   0  0  0  0  0  0  0  0  0  0  0  0
   -2.7380   -1.0240   -0.3810 C   0  0  0  0  0  0  0  0  0  0  0  0
   -2.3070   -2.2020   -0.6740 N   0  0  0  0  0  0  0  0  0  0  0  0
   -4.7170    2.3540   -0.1460 C   0  0  0  0  0  0  0  0  0  0  0  0
   -4.2890    3.4390    0.6230 C   0  0  0  0  0  0  0  0  0  0  0  0
   -3.1090    3.3620    1.3660 C   0  0  0  0  0  0  0  0  0  0  0  0
   -2.3330    2.2070    1.3740 C   0  0  0  0  0  0  0  0  0  0  0  0
    0.2400    0.4700    0.4020 C   0  0  0  0  0  0  0  0  0  0  0  0
    0.2960    0.5890   -0.9780 C   0  0  0  0  0  0  0  0  0  0  0  0
    1.3120    1.3610   -1.5620 C   0  0  0  0  0  0  0  0  0  0  0  0
    1.2040    1.4640   -2.9130 O   0  0  0  0  0  0  0  0  0  0  0  0
    2.4180    1.5800   -3.6450 C   0  0  0  0  0  0  0  0  0  0  0  0
    2.2760    1.9920   -0.7670 C   0  0  0  0  0  0  0  0  0  0  0  0
    3.2140    2.7810   -1.3760 O   0  0  0  0  0  0  0  0  0  0  0  0
    4.5580    2.4280   -1.0440 C   0  0  0  0  0  0  0  0  0  0  0  0
    2.1920    1.8520    0.6310 C   0  0  0  0  0  0  0  0  0  0  0  0
    3.1800    2.4950    1.3210 O   0  0  0  0  0  0  0  0  0  0  0  0
    3.3710    2.0640    2.6630 C   0  0  0  0  0  0  0  0  0  0  0  0
    1.1680    1.1200    1.2200 C   0  0  0  0  0  0  0  0  0  0  0  0
    0.9700   -4.7470   -1.9780 O   0  5  0  0  0  0  0  0  0  0  0  0
   -0.6130   -4.6970    0.4340 H   0  0  0  0  0  0  0  0  0  0  0  0
   -1.3670   -4.4930   -1.1710 H   0  0  0  0  0  0  0  0  0  0  0  0
    3.6490   -1.0960    1.7970 H   0  0  0  0  0  0  0  0  0  0  0  0
    3.2310   -2.7640    1.2490 H   0  0  0  0  0  0  0  0  0  0  0  0
    3.0060   -2.3140    2.9800 H   0  0  0  0  0  0  0  0  0  0  0  0
   -5.6310    2.4310   -0.7300 H   0  0  0  0  0  0  0  0  0  0  0  0
   -4.8750    4.3510    0.6350 H   0  0  0  0  0  0  0  0  0  0  0  0
   -2.7850    4.2260    1.9450 H   0  0  0  0  0  0  0  0  0  0  0  0
   -1.4040    2.1600    1.9360 H   0  0  0  0  0  0  0  0  0  0  0  0
   -0.3990    0.0500   -1.6230 H   0  0  0  0  0  0  0  0  0  0  0  0
    2.1390    1.1780   -4.6270 H   0  0  0  0  0  0  0  0  0  0  0  0
    3.2250    0.9870   -3.2040 H   0  0  0  0  0  0  0  0  0  0  0  0
    2.6970    2.6340   -3.7180 H   0  0  0  0  0  0  0  0  0  0  0  0
    5.1070    2.5810   -1.9780 H   0  0  0  0  0  0  0  0  0  0  0  0
    4.6540    1.3950   -0.6990 H   0  0  0  0  0  0  0  0  0  0  0  0
    4.9040    3.1220   -0.2710 H   0  0  0  0  0  0  0  0  0  0  0  0
    4.3250    2.5280    2.9320 H   0  0  0  0  0  0  0  0  0  0  0  0
    3.4410    0.9690    2.7250 H   0  0  0  0  0  0  0  0  0  0  0  0
    2.5660    2.4440    3.2980 H   0  0  0  0  0  0  0  0  0  0  0  0
    1.1170    0.9990    2.2970 H   0  0  0  0  0  0  0  0  0  0  0  0
  1  2  1  0  0  0  0
  2  3  1  0  0  0  0
  2 34  1  0  0  0  0
  3  4  1  0  0  0  0
  3 35  1  0  0  0  0
  3 36  1  0  0  0  0
  4  5  2  0  0  0  0
  4 17  1  0  0  0  0
  5  6  1  0  0  0  0
  5 10  1  0  0  0  0
  6  7  1  0  0  0  0
  6  9  2  0  0  0  0
  7  8  1  0  0  0  0
  8 37  1  0  0  0  0
  8 38  1  0  0  0  0
  8 39  1  0  0  0  0
 10 11  1  1  0  0  0
 10 12  1  0  0  0  0
 10 22  1  0  0  0  0
 12 13  1  0  0  0  0
 12 16  1  0  0  0  0
 13 14  2  0  0  0  0
 13 21  1  0  0  0  0
 14 15  1  0  0  0  0
 14 18  1  0  0  0  0
 15 16  1  0  0  0  0
 16 17  2  0  0  0  0
 18 19  2  0  0  0  0
 18 40  1  0  0  0  0
 19 20  1  0  0  0  0
 19 41  1  0  0  0  0
 20 21  2  0  0  0  0
 20 42  1  0  0  0  0
 21 43  1  0  0  0  0
 22 23  2  0  0  0  0
 22 33  1  0  0  0  0
 23 24  1  0  0  0  0
 23 44  1  0  0  0  0
 24 25  1  0  0  0  0
 24 27  2  0  0  0  0
 25 26  1  0  0  0  0
 26 45  1  0  0  0  0
 26 46  1  0  0  0  0
 26 47  1  0  0  0  0
 27 28  1  0  0  0  0
 27 30  1  0  0  0  0
 28 29  1  0  0  0  0
 29 48  1  0  0  0  0
 29 49  1  0  0  0  0
 29 50  1  0  0  0  0
 30 31  1  0  0  0  0
 30 33  2  0  0  0  0
 31 32  1  0  0  0  0
 32 51  1  0  0  0  0
 32 52  1  0  0  0  0
 32 53  1  0  0  0  0
 33 54  1  0  0  0  0
M  CHG  2   1  -1  34  -1
M  END
$$$$
RDB15
 OpenBabel09302314563D

 42 45  0  0  1  0  0  0  0  0999 V2000
    2.5450   -1.1130   -1.9150 O   0  5  0  0  0  0  0  0  0  0  0  0
    3.0450   -2.1980   -1.6440 C   0  0  0  0  0  3  0  0  0  0  0  0
    2.4360   -2.9170   -0.2940 C   0  0  0  0  0  0  0  0  0  0  0  0
    1.2380   -2.2080    0.1200 C   0  0  0  0  0  0  0  0  0  0  0  0
    1.1480   -1.1420    0.9850 C   0  0  0  0  0  0  0  0  0  0  0  0
    2.2610   -0.6990    1.7970 C   0  0  0  0  0  0  0  0  0  0  0  0
    2.0680    0.6110    2.1850 O   0  0  0  0  0  0  0  0  0  0  0  0
    3.1430    1.1970    2.9020 C   0  0  0  0  0  0  0  0  0  0  0  0
    3.2270   -1.3010    2.1990 O   0  0  0  0  0  0  0  0  0  0  0  0
   -0.0840   -0.2730    1.0840 C   0  0  2  0  0  0  0  0  0  0  0  0
   -0.3260   -0.0820    2.1680 H   0  0  0  0  0  0  0  0  0  0  0  0
   -1.2580   -0.9630    0.4980 N   0  0  0  0  0  0  0  0  0  0  0  0
   -2.5640   -0.4780    0.5130 C   0  0  0  0  0  0  0  0  0  0  0  0
   -3.4560   -1.2550   -0.2690 C   0  0  0  0  0  0  0  0  0  0  0  0
   -2.6180   -2.5930   -1.0580 S   0  0  0  0  0  0  0  0  0  0  0  0
   -1.0570   -2.0860   -0.3190 C   0  0  0  0  0  0  0  0  0  0  0  0
    0.0620   -2.7000   -0.4990 N   0  0  0  0  0  0  0  0  0  0  0  0
   -4.7970   -0.9270   -0.3480 C   0  0  0  0  0  0  0  0  0  0  0  0
   -5.2610    0.1830    0.3590 C   0  0  0  0  0  0  0  0  0  0  0  0
   -4.3860    0.9480    1.1340 C   0  0  0  0  0  0  0  0  0  0  0  0
   -3.0350    0.6290    1.2250 C   0  0  0  0  0  0  0  0  0  0  0  0
    0.1500    1.0370    0.3500 C   0  0  0  0  0  0  0  0  0  0  0  0
    0.6410    1.0280   -0.9570 C   0  0  0  0  0  0  0  0  0  0  0  0
    0.8420    2.2300   -1.6350 C   0  0  0  0  0  0  0  0  0  0  0  0
    0.5490    3.4090   -0.9680 C   0  0  0  0  0  0  0  0  0  0  0  0
    0.7780    4.9060   -1.7990 Cl  0  0  0  0  0  0  0  0  0  0  0  0
    0.0920    3.4540    0.3410 C   0  0  0  0  0  0  0  0  0  0  0  0
   -0.0980    2.2430    1.0060 C   0  0  0  0  0  0  0  0  0  0  0  0
    3.9230   -2.8670   -2.1700 O   0  5  0  0  0  0  0  0  0  0  0  0
    3.2700   -2.9040    0.4180 H   0  0  0  0  0  0  0  0  0  0  0  0
    2.2610   -3.9610   -0.5960 H   0  0  0  0  0  0  0  0  0  0  0  0
    2.8140    2.2300    3.0470 H   0  0  0  0  0  0  0  0  0  0  0  0
    4.0590    1.1540    2.3020 H   0  0  0  0  0  0  0  0  0  0  0  0
    3.2890    0.6820    3.8550 H   0  0  0  0  0  0  0  0  0  0  0  0
   -5.4880   -1.5140   -0.9500 H   0  0  0  0  0  0  0  0  0  0  0  0
   -6.3100    0.4560    0.3040 H   0  0  0  0  0  0  0  0  0  0  0  0
   -4.7670    1.8130    1.6750 H   0  0  0  0  0  0  0  0  0  0  0  0
   -2.3610    1.2330    1.8260 H   0  0  0  0  0  0  0  0  0  0  0  0
    0.9150    0.0730   -1.4460 H   0  0  0  0  0  0  0  0  0  0  0  0
    1.2390    2.2210   -2.6500 H   0  0  0  0  0  0  0  0  0  0  0  0
   -0.1060    4.3950    0.8420 H   0  0  0  0  0  0  0  0  0  0  0  0
   -0.4160    2.2480    2.0460 H   0  0  0  0  0  0  0  0  0  0  0  0
  1  2  1  0  0  0  0
  2  3  1  0  0  0  0
  2 29  1  0  0  0  0
  3  4  1  0  0  0  0
  3 30  1  0  0  0  0
  3 31  1  0  0  0  0
  4  5  2  0  0  0  0
  4 17  1  0  0  0  0
  5  6  1  0  0  0  0
  5 10  1  0  0  0  0
  6  7  1  0  0  0  0
  6  9  2  0  0  0  0
  7  8  1  0  0  0  0
  8 32  1  0  0  0  0
  8 33  1  0  0  0  0
  8 34  1  0  0  0  0
 10 11  1  1  0  0  0
 10 12  1  0  0  0  0
 10 22  1  0  0  0  0
 12 13  1  0  0  0  0
 12 16  1  0  0  0  0
 13 14  2  0  0  0  0
 13 21  1  0  0  0  0
 14 15  1  0  0  0  0
 14 18  1  0  0  0  0
 15 16  1  0  0  0  0
 16 17  2  0  0  0  0
 18 19  2  0  0  0  0
 18 35  1  0  0  0  0
 19 20  1  0  0  0  0
 19 36  1  0  0  0  0
 20 21  2  0  0  0  0
 20 37  1  0  0  0  0
 21 38  1  0  0  0  0
 22 23  2  0  0  0  0
 22 28  1  0  0  0  0
 23 24  1  0  0  0  0
 23 39  1  0  0  0  0
 24 25  2  0  0  0  0
 24 40  1  0  0  0  0
 25 26  1  0  0  0  0
 25 27  1  0  0  0  0
 27 28  2  0  0  0  0
 27 41  1  0  0  0  0
 28 42  1  0  0  0  0
M  CHG  2   1  -1  29  -1
M  END
$$$$
RDB16
 OpenBabel09302314563D

 42 45  0  0  1  0  0  0  0  0999 V2000
   -4.0000    0.5250   -1.1150 O   0  5  0  0  0  0  0  0  0  0  0  0
   -4.3090    1.5270   -0.4640 C   0  0  0  0  0  3  0  0  0  0  0  0
   -3.3400    1.8320    0.7880 C   0  0  0  0  0  0  0  0  0  0  0  0
   -1.9620    1.5170    0.4140 C   0  0  0  0  0  0  0  0  0  0  0  0
   -1.5380    0.2920   -0.0110 C   0  0  0  0  0  0  0  0  0  0  0  0
   -2.4610   -0.8470   -0.0130 C   0  0  0  0  0  0  0  0  0  0  0  0
   -2.2130   -1.6460   -1.1060 O   0  0  0  0  0  0  0  0  0  0  0  0
   -3.2660   -2.5500   -1.4110 C   0  0  0  0  0  0  0  0  0  0  0  0
   -3.2090   -1.1980    0.8650 O   0  0  0  0  0  0  0  0  0  0  0  0
   -0.1750    0.0330   -0.5880 C   0  0  1  0  0  0  0  0  0  0  0  0
   -0.2870   -0.2420   -1.6830 H   0  0  0  0  0  0  0  0  0  0  0  0
    0.6580    1.2560   -0.5580 N   0  0  0  0  0  0  0  0  0  0  0  0
    2.0290    1.2750   -0.8100 C   0  0  0  0  0  0  0  0  0  0  0  0
    2.6460    2.5010   -0.4580 C   0  0  0  0  0  0  0  0  0  0  0  0
    1.4790    3.6340    0.2280 S   0  0  0  0  0  0  0  0  0  0  0  0
    0.1630    2.4110    0.0870 C   0  0  0  0  0  0  0  0  0  0  0  0
   -1.0420    2.5930    0.5000 N   0  0  0  0  0  0  0  0  0  0  0  0
    4.0000    2.6930   -0.6590 C   0  0  0  0  0  0  0  0  0  0  0  0
    4.7520    1.6570   -1.2190 C   0  0  0  0  0  0  0  0  0  0  0  0
    4.1440    0.4520   -1.5760 C   0  0  0  0  0  0  0  0  0  0  0  0
    2.7810    0.2450   -1.3820 C   0  0  0  0  0  0  0  0  0  0  0  0
    0.4720   -1.1100    0.1760 C   0  0  0  0  0  0  0  0  0  0  0  0
    0.9140   -0.9960    1.4910 C   0  0  0  0  0  0  0  0  0  0  0  0
    0.7300    0.4810    2.3220 Cl  0  0  0  0  0  0  0  0  0  0  0  0
    1.4940   -2.0540    2.1830 C   0  0  0  0  0  0  0  0  0  0  0  0
    1.6280   -3.2860    1.5450 C   0  0  0  0  0  0  0  0  0  0  0  0
    1.1600   -3.4020    0.2420 C   0  0  0  0  0  0  0  0  0  0  0  0
    1.3040   -4.9210   -0.5460 Cl  0  0  0  0  0  0  0  0  0  0  0  0
    0.5820   -2.3520   -0.4560 C   0  0  0  0  0  0  0  0  0  0  0  0
   -5.2360    2.3180   -0.5900 O   0  5  0  0  0  0  0  0  0  0  0  0
   -3.7290    1.1790    1.5890 H   0  0  0  0  0  0  0  0  0  0  0  0
   -3.4930    2.8780    1.0940 H   0  0  0  0  0  0  0  0  0  0  0  0
   -2.9550   -2.9950   -2.3580 H   0  0  0  0  0  0  0  0  0  0  0  0
   -4.2030   -1.9800   -1.5250 H   0  0  0  0  0  0  0  0  0  0  0  0
   -3.3630   -3.2950   -0.6180 H   0  0  0  0  0  0  0  0  0  0  0  0
    4.4850    3.6300   -0.3890 H   0  0  0  0  0  0  0  0  0  0  0  0
    5.8160    1.7920   -1.3770 H   0  0  0  0  0  0  0  0  0  0  0  0
    4.7460   -0.3420   -2.0150 H   0  0  0  0  0  0  0  0  0  0  0  0
    2.3170   -0.6950   -1.6680 H   0  0  0  0  0  0  0  0  0  0  0  0
    1.8320   -1.9320    3.2120 H   0  0  0  0  0  0  0  0  0  0  0  0
    2.0760   -4.1290    2.0630 H   0  0  0  0  0  0  0  0  0  0  0  0
    0.1850   -2.4900   -1.4670 H   0  0  0  0  0  0  0  0  0  0  0  0
  1  2  1  0  0  0  0
  2  3  1  0  0  0  0
  2 30  1  0  0  0  0
  3  4  1  0  0  0  0
  3 31  1  0  0  0  0
  3 32  1  0  0  0  0
  4  5  2  0  0  0  0
  4 17  1  0  0  0  0
  5  6  1  0  0  0  0
  5 10  1  0  0  0  0
  6  7  1  0  0  0  0
  6  9  2  0  0  0  0
  7  8  1  0  0  0  0
  8 33  1  0  0  0  0
  8 34  1  0  0  0  0
  8 35  1  0  0  0  0
 10 11  1  6  0  0  0
 10 12  1  0  0  0  0
 10 22  1  0  0  0  0
 12 13  1  0  0  0  0
 12 16  1  0  0  0  0
 13 14  2  0  0  0  0
 13 21  1  0  0  0  0
 14 15  1  0  0  0  0
 14 18  1  0  0  0  0
 15 16  1  0  0  0  0
 16 17  2  0  0  0  0
 18 19  2  0  0  0  0
 18 36  1  0  0  0  0
 19 20  1  0  0  0  0
 19 37  1  0  0  0  0
 20 21  2  0  0  0  0
 20 38  1  0  0  0  0
 21 39  1  0  0  0  0
 22 23  2  0  0  0  0
 22 29  1  0  0  0  0
 23 24  1  0  0  0  0
 23 25  1  0  0  0  0
 25 26  2  0  0  0  0
 25 40  1  0  0  0  0
 26 27  1  0  0  0  0
 26 41  1  0  0  0  0
 27 28  1  0  0  0  0
 27 29  2  0  0  0  0
 29 42  1  0  0  0  0
M  CHG  2   1  -1  30  -1
M  END
$$$$
RDB17
 OpenBabel09302314563D

 42 45  0  0  1  0  0  0  0  0999 V2000
   -3.8740    0.8140    0.9170 O   0  5  0  0  0  0  0  0  0  0  0  0
   -4.1230    1.6420    0.0360 C   0  0  0  0  0  3  0  0  0  0  0  0
   -3.1510    1.5580   -1.2470 C   0  0  0  0  0  0  0  0  0  0  0  0
   -1.7940    1.2400   -0.8010 C   0  0  0  0  0  0  0  0  0  0  0  0
   -1.4510    0.1210   -0.1020 C   0  0  0  0  0  0  0  0  0  0  0  0
   -2.4650   -0.9020    0.1810 C   0  0  0  0  0  0  0  0  0  0  0  0
   -2.2810   -1.4110    1.4460 O   0  0  0  0  0  0  0  0  0  0  0  0
   -3.4110   -2.1060    1.9580 C   0  0  0  0  0  0  0  0  0  0  0  0
   -3.2500   -1.3990   -0.5880 O   0  0  0  0  0  0  0  0  0  0  0  0
   -0.0930   -0.1120    0.4990 C   0  0  2  0  0  0  0  0  0  0  0  0
   -0.1940   -0.1720    1.6260 H   0  0  0  0  0  0  0  0  0  0  0  0
    0.8050    1.0300    0.2150 N   0  0  0  0  0  0  0  0  0  0  0  0
    2.1400    1.1000    0.6020 C   0  0  0  0  0  0  0  0  0  0  0  0
    2.8130    2.2360    0.0860 C   0  0  0  0  0  0  0  0  0  0  0  0
    1.7360    3.2180   -0.9120 S   0  0  0  0  0  0  0  0  0  0  0  0
    0.3740    2.0720   -0.6270 C   0  0  0  0  0  0  0  0  0  0  0  0
   -0.8100    2.2130   -1.1120 N   0  0  0  0  0  0  0  0  0  0  0  0
    4.1450    2.4600    0.3790 C   0  0  0  0  0  0  0  0  0  0  0  0
    4.8180    1.5470    1.1940 C   0  0  0  0  0  0  0  0  0  0  0  0
    4.1560    0.4280    1.7050 C   0  0  0  0  0  0  0  0  0  0  0  0
    2.8160    0.1890    1.4210 C   0  0  0  0  0  0  0  0  0  0  0  0
    0.4940   -1.4000   -0.0520 C   0  0  0  0  0  0  0  0  0  0  0  0
    0.4710   -2.5430    0.7490 C   0  0  0  0  0  0  0  0  0  0  0  0
    1.0060   -3.7400    0.2790 C   0  0  0  0  0  0  0  0  0  0  0  0
    1.5500   -3.7520   -1.0030 C   0  0  0  0  0  0  0  0  0  0  0  0
    2.0780   -4.8830   -1.4550 F   0  0  0  0  0  0  0  0  0  0  0  0
    1.5640   -2.6340   -1.8350 C   0  0  0  0  0  0  0  0  0  0  0  0
    1.0180   -1.4510   -1.3440 C   0  0  0  0  0  0  0  0  0  0  0  0
   -4.9940    2.5000   -0.0430 O   0  5  0  0  0  0  0  0  0  0  0  0
   -3.2290    2.5090   -1.7960 H   0  0  0  0  0  0  0  0  0  0  0  0
   -3.5990    0.7630   -1.8690 H   0  0  0  0  0  0  0  0  0  0  0  0
   -3.5820   -3.0190    1.3830 H   0  0  0  0  0  0  0  0  0  0  0  0
   -4.2910   -1.4450    1.9070 H   0  0  0  0  0  0  0  0  0  0  0  0
   -3.1340   -2.3160    2.9930 H   0  0  0  0  0  0  0  0  0  0  0  0
    4.6720    3.3290   -0.0120 H   0  0  0  0  0  0  0  0  0  0  0  0
    5.8640    1.7090    1.4310 H   0  0  0  0  0  0  0  0  0  0  0  0
    4.7000   -0.2720    2.3380 H   0  0  0  0  0  0  0  0  0  0  0  0
    2.3070   -0.6860    1.8170 H   0  0  0  0  0  0  0  0  0  0  0  0
    0.0080   -2.5050    1.7380 H   0  0  0  0  0  0  0  0  0  0  0  0
    0.9880   -4.6350    0.8940 H   0  0  0  0  0  0  0  0  0  0  0  0
    1.9780   -2.6810   -2.8380 H   0  0  0  0  0  0  0  0  0  0  0  0
    0.9920   -0.5620   -1.9770 H   0  0  0  0  0  0  0  0  0  0  0  0
  1  2  1  0  0  0  0
  2  3  1  0  0  0  0
  2 29  1  0  0  0  0
  3  4  1  0  0  0  0
  3 30  1  0  0  0  0
  3 31  1  0  0  0  0
  4  5  2  0  0  0  0
  4 17  1  0  0  0  0
  5  6  1  0  0  0  0
  5 10  1  0  0  0  0
  6  7  1  0  0  0  0
  6  9  2  0  0  0  0
  7  8  1  0  0  0  0
  8 32  1  0  0  0  0
  8 33  1  0  0  0  0
  8 34  1  0  0  0  0
 10 11  1  1  0  0  0
 10 12  1  0  0  0  0
 10 22  1  0  0  0  0
 12 13  1  0  0  0  0
 12 16  1  0  0  0  0
 13 14  2  0  0  0  0
 13 21  1  0  0  0  0
 14 15  1  0  0  0  0
 14 18  1  0  0  0  0
 15 16  1  0  0  0  0
 16 17  2  0  0  0  0
 18 19  2  0  0  0  0
 18 35  1  0  0  0  0
 19 20  1  0  0  0  0
 19 36  1  0  0  0  0
 20 21  2  0  0  0  0
 20 37  1  0  0  0  0
 21 38  1  0  0  0  0
 22 23  2  0  0  0  0
 22 28  1  0  0  0  0
 23 24  1  0  0  0  0
 23 39  1  0  0  0  0
 24 25  2  0  0  0  0
 24 40  1  0  0  0  0
 25 26  1  0  0  0  0
 25 27  1  0  0  0  0
 27 28  2  0  0  0  0
 27 41  1  0  0  0  0
 28 42  1  0  0  0  0
M  CHG  2   1  -1  29  -1
M  END
$$$$
RDB18
 OpenBabel09302314563D

 45 48  0  0  1  0  0  0  0  0999 V2000
   -0.5380   -2.7330   -1.9430 O   0  5  0  0  0  0  0  0  0  0  0  0
   -1.4690   -3.5190   -1.8190 C   0  0  0  0  0  3  0  0  0  0  0  0
   -2.4940   -3.1740   -0.5730 C   0  0  0  0  0  0  0  0  0  0  0  0
   -2.1960   -1.8430   -0.0770 C   0  0  0  0  0  0  0  0  0  0  0  0
   -1.3120   -1.4950    0.9210 C   0  0  0  0  0  0  0  0  0  0  0  0
   -0.6950   -2.4710    1.7930 C   0  0  0  0  0  0  0  0  0  0  0  0
    0.4460   -1.9380    2.3570 O   0  0  0  0  0  0  0  0  0  0  0  0
    1.2060   -2.8330    3.1530 C   0  0  0  0  0  0  0  0  0  0  0  0
   -1.0550   -3.5770    2.1120 O   0  0  0  0  0  0  0  0  0  0  0  0
   -0.8270   -0.0800    1.1200 C   0  0  2  0  0  0  0  0  0  0  0  0
   -0.8540    0.1790    2.2170 H   0  0  0  0  0  0  0  0  0  0  0  0
   -1.7130    0.8840    0.4270 N   0  0  0  0  0  0  0  0  0  0  0  0
   -1.5980    2.2710    0.4920 C   0  0  0  0  0  0  0  0  0  0  0  0
   -2.4830    2.9430   -0.3880 C   0  0  0  0  0  0  0  0  0  0  0  0
   -3.4480    1.8010   -1.3250 S   0  0  0  0  0  0  0  0  0  0  0  0
   -2.6390    0.4120   -0.5160 C   0  0  0  0  0  0  0  0  0  0  0  0
   -2.9050   -0.8250   -0.7610 N   0  0  0  0  0  0  0  0  0  0  0  0
   -2.5140    4.3250   -0.4400 C   0  0  0  0  0  0  0  0  0  0  0  0
   -1.6580    5.0490    0.3920 C   0  0  0  0  0  0  0  0  0  0  0  0
   -0.7880    4.3890    1.2620 C   0  0  0  0  0  0  0  0  0  0  0  0
   -0.7470    3.0000    1.3270 C   0  0  0  0  0  0  0  0  0  0  0  0
    0.5870    0.0570    0.5730 C   0  0  0  0  0  0  0  0  0  0  0  0
    1.5890    0.5870    1.3910 C   0  0  0  0  0  0  0  0  0  0  0  0
    2.8770    0.7480    0.8930 C   0  0  0  0  0  0  0  0  0  0  0  0
    3.1630    0.3620   -0.4190 C   0  0  0  0  0  0  0  0  0  0  0  0
    4.5570    0.5700   -0.9200 C   0  0  0  0  0  0  0  0  0  0  0  0
    4.7830    0.2670   -2.1980 F   0  0  0  0  0  0  0  0  0  0  0  0
    4.9860    1.8340   -0.8200 F   0  0  0  0  0  0  0  0  0  0  0  0
    5.4860   -0.1280   -0.2590 F   0  0  0  0  0  0  0  0  0  0  0  0
    2.1790   -0.2120   -1.2220 C   0  0  0  0  0  0  0  0  0  0  0  0
    0.8870   -0.3630   -0.7200 C   0  0  0  0  0  0  0  0  0  0  0  0
   -1.8000   -4.5250   -2.4260 O   0  5  0  0  0  0  0  0  0  0  0  0
   -2.3420   -3.9970    0.1350 H   0  0  0  0  0  0  0  0  0  0  0  0
   -3.4980   -3.2800   -1.0110 H   0  0  0  0  0  0  0  0  0  0  0  0
    2.0790   -2.2380    3.4370 H   0  0  0  0  0  0  0  0  0  0  0  0
    1.4990   -3.7060    2.5570 H   0  0  0  0  0  0  0  0  0  0  0  0
    0.6290   -3.1470    4.0270 H   0  0  0  0  0  0  0  0  0  0  0  0
   -3.1860    4.8500   -1.1160 H   0  0  0  0  0  0  0  0  0  0  0  0
   -1.6670    6.1340    0.3580 H   0  0  0  0  0  0  0  0  0  0  0  0
   -0.1240    4.9730    1.9000 H   0  0  0  0  0  0  0  0  0  0  0  0
   -0.0620    2.4960    2.0030 H   0  0  0  0  0  0  0  0  0  0  0  0
    1.3720    0.8480    2.4240 H   0  0  0  0  0  0  0  0  0  0  0  0
    3.6510    1.1670    1.5310 H   0  0  0  0  0  0  0  0  0  0  0  0
    2.3910   -0.5660   -2.2330 H   0  0  0  0  0  0  0  0  0  0  0  0
    0.1160   -0.8620   -1.3390 H   0  0  0  0  0  0  0  0  0  0  0  0
  1  2  1  0  0  0  0
  2  3  1  0  0  0  0
  2 32  1  0  0  0  0
  3  4  1  0  0  0  0
  3 33  1  0  0  0  0
  3 34  1  0  0  0  0
  4  5  2  0  0  0  0
  4 17  1  0  0  0  0
  5  6  1  0  0  0  0
  5 10  1  0  0  0  0
  6  7  1  0  0  0  0
  6  9  2  0  0  0  0
  7  8  1  0  0  0  0
  8 35  1  0  0  0  0
  8 36  1  0  0  0  0
  8 37  1  0  0  0  0
 10 11  1  1  0  0  0
 10 12  1  0  0  0  0
 10 22  1  0  0  0  0
 12 13  1  0  0  0  0
 12 16  1  0  0  0  0
 13 14  2  0  0  0  0
 13 21  1  0  0  0  0
 14 15  1  0  0  0  0
 14 18  1  0  0  0  0
 15 16  1  0  0  0  0
 16 17  2  0  0  0  0
 18 19  2  0  0  0  0
 18 38  1  0  0  0  0
 19 20  1  0  0  0  0
 19 39  1  0  0  0  0
 20 21  2  0  0  0  0
 20 40  1  0  0  0  0
 21 41  1  0  0  0  0
 22 23  2  0  0  0  0
 22 31  1  0  0  0  0
 23 24  1  0  0  0  0
 23 42  1  0  0  0  0
 24 25  2  0  0  0  0
 24 43  1  0  0  0  0
 25 26  1  0  0  0  0
 25 30  1  0  0  0  0
 26 27  1  0  0  0  0
 26 28  1  0  0  0  0
 26 29  1  0  0  0  0
 30 31  2  0  0  0  0
 30 44  1  0  0  0  0
 31 45  1  0  0  0  0
M  CHG  2   1  -1  32  -1
M  END
$$$$
RDB19
 OpenBabel09302314563D

 50 53  0  0  1  0  0  0  0  0999 V2000
    3.2480   -1.5930   -0.4370 O   0  5  0  0  0  0  0  0  0  0  0  0
    3.0890   -2.5980   -1.1400 C   0  0  0  0  0  3  0  0  0  0  0  0
    1.7420   -3.4150   -0.8330 C   0  0  0  0  0  0  0  0  0  0  0  0
    0.6800   -2.4890   -0.4300 C   0  0  0  0  0  0  0  0  0  0  0  0
    0.7380   -1.6630    0.6540 C   0  0  0  0  0  0  0  0  0  0  0  0
    1.8990   -1.6950    1.5480 C   0  0  0  0  0  0  0  0  0  0  0  0
    2.2390   -0.4180    1.9090 O   0  0  0  0  0  0  0  0  0  0  0  0
    3.5580   -0.2880    2.4250 C   0  0  0  0  0  0  0  0  0  0  0  0
    2.4240   -2.6600    2.0480 O   0  0  0  0  0  0  0  0  0  0  0  0
   -0.2840   -0.5900    0.9270 C   0  0  2  0  0  0  0  0  0  0  0  0
   -0.4780   -0.5220    2.0330 H   0  0  0  0  0  0  0  0  0  0  0  0
   -1.5550   -0.9900    0.2640 N   0  0  0  0  0  0  0  0  0  0  0  0
   -2.8130   -0.4530    0.5160 C   0  0  0  0  0  0  0  0  0  0  0  0
   -3.7570   -0.7280   -0.5080 C   0  0  0  0  0  0  0  0  0  0  0  0
   -3.0410   -1.6980   -1.7980 S   0  0  0  0  0  0  0  0  0  0  0  0
   -1.4720   -1.7580   -0.9150 C   0  0  0  0  0  0  0  0  0  0  0  0
   -0.4600   -2.4720   -1.2740 N   0  0  0  0  0  0  0  0  0  0  0  0
   -5.0580   -0.2710   -0.4130 C   0  0  0  0  0  0  0  0  0  0  0  0
   -5.4380    0.4500    0.7210 C   0  0  0  0  0  0  0  0  0  0  0  0
   -4.5220    0.6910    1.7480 C   0  0  0  0  0  0  0  0  0  0  0  0
   -3.2080    0.2420    1.6640 C   0  0  0  0  0  0  0  0  0  0  0  0
    0.1660    0.7640    0.4040 C   0  0  0  0  0  0  0  0  0  0  0  0
   -0.4960    1.9200    0.8080 C   0  0  0  0  0  0  0  0  0  0  0  0
   -0.0960    3.1720    0.3460 C   0  0  0  0  0  0  0  0  0  0  0  0
    0.9900    3.2740   -0.5310 C   0  0  0  0  0  0  0  0  0  0  0  0
    1.4260    4.5090   -1.1140 N   0  0  0  0  0  0  0  0  0  0  0  0
    0.4890    5.6370   -0.9670 C   0  0  0  0  0  0  0  0  0  0  0  0
    2.7860    4.8860   -0.6690 C   0  0  0  0  0  0  0  0  0  0  0  0
    1.6660    2.1110   -0.9330 C   0  0  0  0  0  0  0  0  0  0  0  0
    1.2590    0.8700   -0.4610 C   0  0  0  0  0  0  0  0  0  0  0  0
    3.7960   -3.0850   -2.0130 O   0  5  0  0  0  0  0  0  0  0  0  0
    2.0300   -4.1120   -0.0250 H   0  0  0  0  0  0  0  0  0  0  0  0
    1.4960   -4.0110   -1.7250 H   0  0  0  0  0  0  0  0  0  0  0  0
    3.6750    0.7910    2.5460 H   0  0  0  0  0  0  0  0  0  0  0  0
    4.2700   -0.6860    1.6840 H   0  0  0  0  0  0  0  0  0  0  0  0
    3.6500   -0.8210    3.3730 H   0  0  0  0  0  0  0  0  0  0  0  0
   -5.7840   -0.4650   -1.2000 H   0  0  0  0  0  0  0  0  0  0  0  0
   -6.4540    0.8200    0.8070 H   0  0  0  0  0  0  0  0  0  0  0  0
   -4.8430    1.2400    2.6310 H   0  0  0  0  0  0  0  0  0  0  0  0
   -2.5090    0.4160    2.4780 H   0  0  0  0  0  0  0  0  0  0  0  0
   -1.3340    1.8650    1.4980 H   0  0  0  0  0  0  0  0  0  0  0  0
   -0.6270    4.0530    0.6830 H   0  0  0  0  0  0  0  0  0  0  0  0
   -0.5040    5.3320   -1.3430 H   0  0  0  0  0  0  0  0  0  0  0  0
    0.8360    6.4680   -1.6020 H   0  0  0  0  0  0  0  0  0  0  0  0
    0.3770    6.0100    0.0620 H   0  0  0  0  0  0  0  0  0  0  0  0
    3.4730    4.0340   -0.8250 H   0  0  0  0  0  0  0  0  0  0  0  0
    2.8400    5.1810    0.3890 H   0  0  0  0  0  0  0  0  0  0  0  0
    3.1480    5.7200   -1.2890 H   0  0  0  0  0  0  0  0  0  0  0  0
    2.5080    2.1750   -1.6200 H   0  0  0  0  0  0  0  0  0  0  0  0
    1.8350   -0.0310   -0.7540 H   0  0  0  0  0  0  0  0  0  0  0  0
  1  2  1  0  0  0  0
  2  3  1  0  0  0  0
  2 31  1  0  0  0  0
  3  4  1  0  0  0  0
  3 32  1  0  0  0  0
  3 33  1  0  0  0  0
  4  5  2  0  0  0  0
  4 17  1  0  0  0  0
  5  6  1  0  0  0  0
  5 10  1  0  0  0  0
  6  7  1  0  0  0  0
  6  9  2  0  0  0  0
  7  8  1  0  0  0  0
  8 34  1  0  0  0  0
  8 35  1  0  0  0  0
  8 36  1  0  0  0  0
 10 11  1  1  0  0  0
 10 12  1  0  0  0  0
 10 22  1  0  0  0  0
 12 13  1  0  0  0  0
 12 16  1  0  0  0  0
 13 14  2  0  0  0  0
 13 21  1  0  0  0  0
 14 15  1  0  0  0  0
 14 18  1  0  0  0  0
 15 16  1  0  0  0  0
 16 17  2  0  0  0  0
 18 19  2  0  0  0  0
 18 37  1  0  0  0  0
 19 20  1  0  0  0  0
 19 38  1  0  0  0  0
 20 21  2  0  0  0  0
 20 39  1  0  0  0  0
 21 40  1  0  0  0  0
 22 23  2  0  0  0  0
 22 30  1  0  0  0  0
 23 24  1  0  0  0  0
 23 41  1  0  0  0  0
 24 25  2  0  0  0  0
 24 42  1  0  0  0  0
 25 26  1  0  0  0  0
 25 29  1  0  0  0  0
 26 27  1  0  0  0  0
 26 28  1  0  0  0  0
 27 43  1  0  0  0  0
 27 44  1  0  0  0  0
 27 45  1  0  0  0  0
 28 46  1  0  0  0  0
 28 47  1  0  0  0  0
 28 48  1  0  0  0  0
 29 30  2  0  0  0  0
 29 49  1  0  0  0  0
 30 50  1  0  0  0  0
M  CHG  2   1  -1  31  -1
M  END
$$$$
RDB20
 OpenBabel09302314563D

 42 45  0  0  1  0  0  0  0  0999 V2000
   -1.0500   -2.5930   -2.0420 O   0  5  0  0  0  0  0  0  0  0  0  0
   -2.1600   -3.0810   -1.8910 C   0  0  0  0  0  3  0  0  0  0  0  0
   -3.0830   -2.3530   -0.7230 C   0  0  0  0  0  0  0  0  0  0  0  0
   -2.4360   -1.1260   -0.2890 C   0  0  0  0  0  0  0  0  0  0  0  0
   -1.6860   -0.9720    0.8470 C   0  0  0  0  0  0  0  0  0  0  0  0
   -1.5850   -1.9830    1.8940 C   0  0  0  0  0  0  0  0  0  0  0  0
   -2.7190   -2.2960    2.6150 O   0  0  0  0  0  0  0  0  0  0  0  0
   -3.8880   -1.5240    2.4170 C   0  0  0  0  0  0  0  0  0  0  0  0
   -0.5970   -2.5560    2.2750 O   0  0  0  0  0  0  0  0  0  0  0  0
   -0.7830    0.2120    1.0740 C   0  0  2  0  0  0  0  0  0  0  0  0
   -0.8480    0.5390    2.1500 H   0  0  0  0  0  0  0  0  0  0  0  0
   -1.2360    1.3510    0.2400 N   0  0  0  0  0  0  0  0  0  0  0  0
   -0.7140    2.6430    0.2960 C   0  0  0  0  0  0  0  0  0  0  0  0
   -1.1560    3.4690   -0.7680 C   0  0  0  0  0  0  0  0  0  0  0  0
   -2.2110    2.5860   -1.8740 S   0  0  0  0  0  0  0  0  0  0  0  0
   -2.0490    1.0950   -0.8810 C   0  0  0  0  0  0  0  0  0  0  0  0
   -2.6400   -0.0190   -1.1480 N   0  0  0  0  0  0  0  0  0  0  0  0
   -0.7540    4.7890   -0.8510 C   0  0  0  0  0  0  0  0  0  0  0  0
    0.0920    5.2990    0.1360 C   0  0  0  0  0  0  0  0  0  0  0  0
    0.5220    4.4890    1.1890 C   0  0  0  0  0  0  0  0  0  0  0  0
    0.1260    3.1590    1.2860 C   0  0  0  0  0  0  0  0  0  0  0  0
    0.6520   -0.1350    0.7120 C   0  0  0  0  0  0  0  0  0  0  0  0
    1.6850    0.2230    1.5800 C   0  0  0  0  0  0  0  0  0  0  0  0
    3.0100   -0.0490    1.2400 C   0  0  0  0  0  0  0  0  0  0  0  0
    3.2630   -0.6940    0.0370 C   0  0  0  0  0  0  0  0  0  0  0  0
    5.0800   -1.0520   -0.4400 Br  0  0  0  0  0  0  0  0  0  0  0  0
    2.2520   -1.0960   -0.8240 C   0  0  0  0  0  0  0  0  0  0  0  0
    0.9320   -0.8130   -0.4740 C   0  0  0  0  0  0  0  0  0  0  0  0
   -2.7490   -4.0140   -2.4140 O   0  5  0  0  0  0  0  0  0  0  0  0
   -3.1820   -3.1250    0.0500 H   0  0  0  0  0  0  0  0  0  0  0  0
   -4.0510   -2.2060   -1.2200 H   0  0  0  0  0  0  0  0  0  0  0  0
   -4.5180   -1.8080    3.2670 H   0  0  0  0  0  0  0  0  0  0  0  0
   -4.3680   -1.8050    1.4730 H   0  0  0  0  0  0  0  0  0  0  0  0
   -3.6700   -0.4520    2.4400 H   0  0  0  0  0  0  0  0  0  0  0  0
   -1.0820    5.4300   -1.6680 H   0  0  0  0  0  0  0  0  0  0  0  0
    0.4200    6.3320    0.0820 H   0  0  0  0  0  0  0  0  0  0  0  0
    1.1850    4.9050    1.9470 H   0  0  0  0  0  0  0  0  0  0  0  0
    0.4690    2.5370    2.1070 H   0  0  0  0  0  0  0  0  0  0  0  0
    1.4680    0.6980    2.5330 H   0  0  0  0  0  0  0  0  0  0  0  0
    3.8110    0.2370    1.9150 H   0  0  0  0  0  0  0  0  0  0  0  0
    2.4540   -1.6360   -1.7490 H   0  0  0  0  0  0  0  0  0  0  0  0
    0.1110   -1.1640   -1.1310 H   0  0  0  0  0  0  0  0  0  0  0  0
  1  2  1  0  0  0  0
  2  3  1  0  0  0  0
  2 29  1  0  0  0  0
  3  4  1  0  0  0  0
  3 30  1  0  0  0  0
  3 31  1  0  0  0  0
  4  5  2  0  0  0  0
  4 17  1  0  0  0  0
  5  6  1  0  0  0  0
  5 10  1  0  0  0  0
  6  7  1  0  0  0  0
  6  9  2  0  0  0  0
  7  8  1  0  0  0  0
  8 32  1  0  0  0  0
  8 33  1  0  0  0  0
  8 34  1  0  0  0  0
 10 11  1  1  0  0  0
 10 12  1  0  0  0  0
 10 22  1  0  0  0  0
 12 13  1  0  0  0  0
 12 16  1  0  0  0  0
 13 14  2  0  0  0  0
 13 21  1  0  0  0  0
 14 15  1  0  0  0  0
 14 18  1  0  0  0  0
 15 16  1  0  0  0  0
 16 17  2  0  0  0  0
 18 19  2  0  0  0  0
 18 35  1  0  0  0  0
 19 20  1  0  0  0  0
 19 36  1  0  0  0  0
 20 21  2  0  0  0  0
 20 37  1  0  0  0  0
 21 38  1  0  0  0  0
 22 23  2  0  0  0  0
 22 28  1  0  0  0  0
 23 24  1  0  0  0  0
 23 39  1  0  0  0  0
 24 25  2  0  0  0  0
 24 40  1  0  0  0  0
 25 26  1  0  0  0  0
 25 27  1  0  0  0  0
 27 28  2  0  0  0  0
 27 41  1  0  0  0  0
 28 42  1  0  0  0  0
M  CHG  2   1  -1  29  -1
M  END
$$$$
RDB21
 OpenBabel09302314563D

 41 44  0  0  1  0  0  0  0  0999 V2000
   -1.7730    0.5100    3.2480 O   0  0  0  0  0  0  0  0  0  0  0  0
   -2.0570    0.4580    2.0700 C   0  0  0  0  0  0  0  0  0  0  0  0
   -3.2230    1.0730    1.7520 O   0  0  0  0  0  0  0  0  0  0  0  0
   -3.6090    1.2310    0.3950 C   0  0  0  0  0  0  0  0  0  0  0  0
   -1.2040   -0.2020    1.0780 C   0  0  0  0  0  0  0  0  0  0  0  0
   -1.5230   -1.3670    0.4360 C   0  0  0  0  0  0  0  0  0  0  0  0
   -2.8590   -1.9550    0.3240 C   0  0  0  0  0  0  0  0  0  0  0  0
   -3.5230   -1.5230   -1.0870 C   0  0  0  0  0  3  0  0  0  0  0  0
   -4.5840   -2.0900   -1.3150 O   0  5  0  0  0  0  0  0  0  0  0  0
   -2.9070   -0.6610   -1.7140 O   0  5  0  0  0  0  0  0  0  0  0  0
   -0.5060   -2.1410   -0.1710 N   0  0  0  0  0  0  0  0  0  0  0  0
    0.7150   -1.7250   -0.1150 C   0  0  0  0  0  0  0  0  0  0  0  0
    2.1340   -2.6310   -0.7490 S   0  0  0  0  0  0  0  0  0  0  0  0
    3.2290   -1.3580   -0.2020 C   0  0  0  0  0  0  0  0  0  0  0  0
    2.5220   -0.3050    0.4280 C   0  0  0  0  0  0  0  0  0  0  0  0
    3.2000    0.8110    0.9240 C   0  0  0  0  0  0  0  0  0  0  0  0
    4.5830    0.8540    0.7850 C   0  0  0  0  0  0  0  0  0  0  0  0
    5.2820   -0.1870    0.1670 C   0  0  0  0  0  0  0  0  0  0  0  0
    4.6050   -1.3010   -0.3320 C   0  0  0  0  0  0  0  0  0  0  0  0
    1.1470   -0.5320    0.4840 N   0  0  0  0  0  0  0  0  0  0  0  0
    0.1410    0.4540    0.9250 C   0  0  1  0  0  0  0  0  0  0  0  0
    0.4790    0.8970    1.9090 H   0  0  0  0  0  0  0  0  0  0  0  0
    0.0710    1.5450   -0.1460 C   0  0  0  0  0  0  0  0  0  0  0  0
    0.6760    2.7060    0.1750 N   0  0  0  0  0  0  0  0  0  0  0  0
    0.6700    3.7010   -0.7310 C   0  0  0  0  0  0  0  0  0  0  0  0
    0.0680    3.5730   -1.9890 C   0  0  0  0  0  0  0  0  0  0  0  0
   -0.5550    2.3670   -2.3100 C   0  0  0  0  0  0  0  0  0  0  0  0
   -0.5560    1.3320   -1.3800 C   0  0  0  0  0  0  0  0  0  0  0  0
   -4.3930    0.4900    0.1870 H   0  0  0  0  0  0  0  0  0  0  0  0
   -2.7850    1.0900   -0.3180 H   0  0  0  0  0  0  0  0  0  0  0  0
   -3.9970    2.2510    0.3460 H   0  0  0  0  0  0  0  0  0  0  0  0
   -3.5600   -1.6260    1.1030 H   0  0  0  0  0  0  0  0  0  0  0  0
   -2.8550   -3.0570    0.3120 H   0  0  0  0  0  0  0  0  0  0  0  0
    2.6540    1.6340    1.3900 H   0  0  0  0  0  0  0  0  0  0  0  0
    5.1300    1.7170    1.1620 H   0  0  0  0  0  0  0  0  0  0  0  0
    6.3610   -0.1270    0.0710 H   0  0  0  0  0  0  0  0  0  0  0  0
    5.1610   -2.1020   -0.8150 H   0  0  0  0  0  0  0  0  0  0  0  0
    1.1680    4.6230   -0.4240 H   0  0  0  0  0  0  0  0  0  0  0  0
    0.0850    4.3960   -2.6920 H   0  0  0  0  0  0  0  0  0  0  0  0
   -1.0460    2.2310   -3.2730 H   0  0  0  0  0  0  0  0  0  0  0  0
   -1.0680    0.3770   -1.6020 H   0  0  0  0  0  0  0  0  0  0  0  0
  1  2  2  0  0  0  0
  2  3  1  0  0  0  0
  2  5  1  0  0  0  0
  3  4  1  0  0  0  0
  4 29  1  0  0  0  0
  4 30  1  0  0  0  0
  4 31  1  0  0  0  0
  5  6  2  0  0  0  0
  5 21  1  0  0  0  0
  6  7  1  0  0  0  0
  6 11  1  0  0  0  0
  7  8  1  0  0  0  0
  7 32  1  0  0  0  0
  7 33  1  0  0  0  0
  8  9  1  0  0  0  0
  8 10  1  0  0  0  0
 11 12  2  0  0  0  0
 12 13  1  0  0  0  0
 12 20  1  0  0  0  0
 13 14  1  0  0  0  0
 14 15  2  0  0  0  0
 14 19  1  0  0  0  0
 15 16  1  0  0  0  0
 15 20  1  0  0  0  0
 16 17  2  0  0  0  0
 16 34  1  0  0  0  0
 17 18  1  0  0  0  0
 17 35  1  0  0  0  0
 18 19  2  0  0  0  0
 18 36  1  0  0  0  0
 19 37  1  0  0  0  0
 20 21  1  0  0  0  0
 21 22  1  1  0  0  0
 21 23  1  0  0  0  0
 23 24  2  0  0  0  0
 23 28  1  0  0  0  0
 24 25  1  0  0  0  0
 25 26  2  0  0  0  0
 25 38  1  0  0  0  0
 26 27  1  0  0  0  0
 26 39  1  0  0  0  0
 27 28  2  0  0  0  0
 27 40  1  0  0  0  0
 28 41  1  0  0  0  0
M  CHG  2   9  -1  10  -1
M  END
$$$$
RDB22
 OpenBabel09302314563D

 39 42  0  0  1  0  0  0  0  0999 V2000
   -2.5740    1.9750    1.4220 O   0  0  0  0  0  0  0  0  0  0  0  0
   -2.2430    0.8370    1.6250 C   0  0  0  0  0  0  0  0  0  0  0  0
   -2.7850    0.3030    2.7790 O   0  0  0  0  0  0  0  0  0  0  0  0
   -2.3450   -0.9700    3.2110 C   0  0  0  0  0  0  0  0  0  0  0  0
   -1.3110    0.0100    0.8640 C   0  0  0  0  0  0  0  0  0  0  0  0
   -1.7000   -1.0990    0.1590 C   0  0  0  0  0  0  0  0  0  0  0  0
   -3.0680   -1.5400   -0.0440 C   0  0  0  0  0  0  0  0  0  0  0  0
   -3.5920   -1.0980   -1.5640 C   0  0  0  0  0  3  0  0  0  0  0  0
   -2.8580   -0.3200   -2.1460 O   0  5  0  0  0  0  0  0  0  0  0  0
   -4.6580   -1.6340   -1.8350 O   0  5  0  0  0  0  0  0  0  0  0  0
   -0.7160   -1.9480   -0.4050 N   0  0  0  0  0  0  0  0  0  0  0  0
    0.5270   -1.6350   -0.2760 C   0  0  0  0  0  0  0  0  0  0  0  0
    1.8880   -2.6150   -0.9300 S   0  0  0  0  0  0  0  0  0  0  0  0
    3.0640   -1.4870   -0.2520 C   0  0  0  0  0  0  0  0  0  0  0  0
    2.4220   -0.4210    0.4290 C   0  0  0  0  0  0  0  0  0  0  0  0
    3.1800    0.5810    1.0410 C   0  0  0  0  0  0  0  0  0  0  0  0
    4.5660    0.5060    0.9570 C   0  0  0  0  0  0  0  0  0  0  0  0
    5.1960   -0.5430    0.2830 C   0  0  0  0  0  0  0  0  0  0  0  0
    4.4430   -1.5480   -0.3260 C   0  0  0  0  0  0  0  0  0  0  0  0
    1.0330   -0.5340    0.4400 N   0  0  0  0  0  0  0  0  0  0  0  0
    0.0990    0.5420    0.8670 C   0  0  1  0  0  0  0  0  0  0  0  0
    0.3910    0.8280    1.9200 H   0  0  0  0  0  0  0  0  0  0  0  0
    0.2410    1.7200   -0.0390 C   0  0  0  0  0  0  0  0  0  0  0  0
    0.8790    2.9000    0.2610 C   0  0  0  0  0  0  0  0  0  0  0  0
    0.8690    3.8250   -0.8230 C   0  0  0  0  0  0  0  0  0  0  0  0
    0.2160    3.3420   -1.9300 C   0  0  0  0  0  0  0  0  0  0  0  0
   -0.4070    1.7670   -1.6410 S   0  0  0  0  0  0  0  0  0  0  0  0
   -2.7690   -1.0480    4.2180 H   0  0  0  0  0  0  0  0  0  0  0  0
   -1.2530   -1.0250    3.2460 H   0  0  0  0  0  0  0  0  0  0  0  0
   -2.7540   -1.7510    2.5590 H   0  0  0  0  0  0  0  0  0  0  0  0
   -3.8080   -1.0800    0.6200 H   0  0  0  0  0  0  0  0  0  0  0  0
   -3.1980   -2.6300   -0.0460 H   0  0  0  0  0  0  0  0  0  0  0  0
    2.6970    1.4060    1.5590 H   0  0  0  0  0  0  0  0  0  0  0  0
    5.1720    1.2830    1.4220 H   0  0  0  0  0  0  0  0  0  0  0  0
    6.2790   -0.5760    0.2290 H   0  0  0  0  0  0  0  0  0  0  0  0
    4.9450   -2.3600   -0.8500 H   0  0  0  0  0  0  0  0  0  0  0  0
    1.3290    3.1350    1.2090 H   0  0  0  0  0  0  0  0  0  0  0  0
    1.3270    4.7950   -0.7540 H   0  0  0  0  0  0  0  0  0  0  0  0
    0.0750    3.8540   -2.8620 H   0  0  0  0  0  0  0  0  0  0  0  0
  1  2  2  0  0  0  0
  2  3  1  0  0  0  0
  2  5  1  0  0  0  0
  3  4  1  0  0  0  0
  4 28  1  0  0  0  0
  4 29  1  0  0  0  0
  4 30  1  0  0  0  0
  5  6  2  0  0  0  0
  5 21  1  0  0  0  0
  6  7  1  0  0  0  0
  6 11  1  0  0  0  0
  7  8  1  0  0  0  0
  7 31  1  0  0  0  0
  7 32  1  0  0  0  0
  8  9  1  0  0  0  0
  8 10  1  0  0  0  0
 11 12  2  0  0  0  0
 12 13  1  0  0  0  0
 12 20  1  0  0  0  0
 13 14  1  0  0  0  0
 14 15  2  0  0  0  0
 14 19  1  0  0  0  0
 15 16  1  0  0  0  0
 15 20  1  0  0  0  0
 16 17  2  0  0  0  0
 16 33  1  0  0  0  0
 17 18  1  0  0  0  0
 17 34  1  0  0  0  0
 18 19  2  0  0  0  0
 18 35  1  0  0  0  0
 19 36  1  0  0  0  0
 20 21  1  0  0  0  0
 21 22  1  1  0  0  0
 21 23  1  0  0  0  0
 23 24  2  0  0  0  0
 23 27  1  0  0  0  0
 24 25  1  0  0  0  0
 24 37  1  0  0  0  0
 25 26  2  0  0  0  0
 25 38  1  0  0  0  0
 26 27  1  0  0  0  0
 26 39  1  0  0  0  0
M  CHG  2   9  -1  10  -1
M  END
$$$$
RDB23
 OpenBabel09302314563D

 46 50  0  0  1  0  0  0  0  0999 V2000
    1.5240    3.0830   -0.8270 O   0  0  0  0  0  0  0  0  0  0  0  0
    1.5490    2.2620    0.0580 C   0  0  0  0  0  0  0  0  0  0  0  0
    1.6170    2.7660    1.3250 O   0  0  0  0  0  0  0  0  0  0  0  0
    2.0230    1.8900    2.3670 C   0  0  0  0  0  0  0  0  0  0  0  0
    1.4310    0.8100   -0.1290 C   0  0  0  0  0  0  0  0  0  0  0  0
    2.4290    0.0660   -0.6830 C   0  0  0  0  0  0  0  0  0  0  0  0
    3.7700    0.5510   -1.0150 C   0  0  0  0  0  0  0  0  0  0  0  0
    4.7810    0.3140    0.2230 C   0  0  0  0  0  3  0  0  0  0  0  0
    4.2420    0.0530    1.2980 O   0  5  0  0  0  0  0  0  0  0  0  0
    5.9600    0.4500   -0.0810 O   0  5  0  0  0  0  0  0  0  0  0  0
    2.2050   -1.2990   -0.9900 N   0  0  0  0  0  0  0  0  0  0  0  0
    1.1200   -1.8550   -0.5740 C   0  0  0  0  0  0  0  0  0  0  0  0
    0.7070   -3.5890   -0.8390 S   0  0  0  0  0  0  0  0  0  0  0  0
   -0.8310   -3.3800    0.0000 C   0  0  0  0  0  0  0  0  0  0  0  0
   -0.9910   -2.0480    0.4580 C   0  0  0  0  0  0  0  0  0  0  0  0
   -2.1470   -1.6760    1.1510 C   0  0  0  0  0  0  0  0  0  0  0  0
   -3.1270   -2.6390    1.3680 C   0  0  0  0  0  0  0  0  0  0  0  0
   -2.9670   -3.9510    0.9140 C   0  0  0  0  0  0  0  0  0  0  0  0
   -1.8120   -4.3280    0.2270 C   0  0  0  0  0  0  0  0  0  0  0  0
    0.1000   -1.2310    0.1680 N   0  0  0  0  0  0  0  0  0  0  0  0
    0.0970    0.2500    0.2920 C   0  0  2  0  0  0  0  0  0  0  0  0
   -0.0800    0.4850    1.3840 H   0  0  0  0  0  0  0  0  0  0  0  0
   -0.9930    0.8290   -0.5450 C   0  0  0  0  0  0  0  0  0  0  0  0
   -1.0590    0.8110   -1.9280 C   0  0  0  0  0  0  0  0  0  0  0  0
   -2.2390    1.4280   -2.3490 N   0  0  0  0  0  0  0  0  0  0  0  0
   -2.9240    1.8820   -1.2190 C   0  0  0  0  0  0  0  0  0  0  0  0
   -2.1570    1.5200   -0.0640 C   0  0  0  0  0  0  0  0  0  0  0  0
   -2.6200    1.8880    1.2020 C   0  0  0  0  0  0  0  0  0  0  0  0
   -3.8230    2.5650    1.2990 C   0  0  0  0  0  0  0  0  0  0  0  0
   -4.5770    2.8960    0.1540 C   0  0  0  0  0  0  0  0  0  0  0  0
   -4.1410    2.5660   -1.1180 C   0  0  0  0  0  0  0  0  0  0  0  0
    2.5220    2.5560    3.0770 H   0  0  0  0  0  0  0  0  0  0  0  0
    2.7480    1.1260    2.0130 H   0  0  0  0  0  0  0  0  0  0  0  0
    1.1410    1.4230    2.8050 H   0  0  0  0  0  0  0  0  0  0  0  0
    3.8100    1.6310   -1.2240 H   0  0  0  0  0  0  0  0  0  0  0  0
    4.2260    0.0220   -1.8680 H   0  0  0  0  0  0  0  0  0  0  0  0
   -2.2850   -0.6550    1.4970 H   0  0  0  0  0  0  0  0  0  0  0  0
   -4.0360   -2.3630    1.8990 H   0  0  0  0  0  0  0  0  0  0  0  0
   -3.7470   -4.6830    1.0970 H   0  0  0  0  0  0  0  0  0  0  0  0
   -1.6980   -5.3530   -0.1200 H   0  0  0  0  0  0  0  0  0  0  0  0
   -0.3510    0.4120   -2.6350 H   0  0  0  0  0  0  0  0  0  0  0  0
   -2.5020    1.6000   -3.2880 H   0  0  0  0  0  0  0  0  0  0  0  0
   -2.0310    1.6590    2.0880 H   0  0  0  0  0  0  0  0  0  0  0  0
   -4.2010    2.8620    2.2740 H   0  0  0  0  0  0  0  0  0  0  0  0
   -5.5160    3.4280    0.2810 H   0  0  0  0  0  0  0  0  0  0  0  0
   -4.7110    2.8290   -1.9990 H   0  0  0  0  0  0  0  0  0  0  0  0
  1  2  2  0  0  0  0
  2  3  1  0  0  0  0
  2  5  1  0  0  0  0
  3  4  1  0  0  0  0
  4 32  1  0  0  0  0
  4 33  1  0  0  0  0
  4 34  1  0  0  0  0
  5  6  2  0  0  0  0
  5 21  1  0  0  0  0
  6  7  1  0  0  0  0
  6 11  1  0  0  0  0
  7  8  1  0  0  0  0
  7 35  1  0  0  0  0
  7 36  1  0  0  0  0
  8  9  1  0  0  0  0
  8 10  1  0  0  0  0
 11 12  2  0  0  0  0
 12 13  1  0  0  0  0
 12 20  1  0  0  0  0
 13 14  1  0  0  0  0
 14 15  2  0  0  0  0
 14 19  1  0  0  0  0
 15 16  1  0  0  0  0
 15 20  1  0  0  0  0
 16 17  2  0  0  0  0
 16 37  1  0  0  0  0
 17 18  1  0  0  0  0
 17 38  1  0  0  0  0
 18 19  2  0  0  0  0
 18 39  1  0  0  0  0
 19 40  1  0  0  0  0
 20 21  1  0  0  0  0
 21 22  1  1  0  0  0
 21 23  1  0  0  0  0
 23 24  2  0  0  0  0
 23 27  1  0  0  0  0
 24 25  1  0  0  0  0
 24 41  1  0  0  0  0
 25 26  1  0  0  0  0
 25 42  1  0  0  0  0
 26 27  2  0  0  0  0
 26 31  1  0  0  0  0
 27 28  1  0  0  0  0
 28 29  2  0  0  0  0
 28 43  1  0  0  0  0
 29 30  1  0  0  0  0
 29 44  1  0  0  0  0
 30 31  2  0  0  0  0
 30 45  1  0  0  0  0
 31 46  1  0  0  0  0
M  CHG  2   9  -1  10  -1
M  END
$$$$
RDB24
 OpenBabel09302314563D

 46 49  0  0  1  0  0  0  0  0999 V2000
    1.3410   -1.2880    2.9700 O   0  0  0  0  0  0  0  0  0  0  0  0
    1.4570   -1.6760    1.8240 C   0  0  0  0  0  0  0  0  0  0  0  0
    2.5500   -2.3940    1.4450 O   0  0  0  0  0  0  0  0  0  0  0  0
    3.5840   -2.5000    2.4140 C   0  0  0  0  0  0  0  0  0  0  0  0
    0.5100   -1.4910    0.7450 C   0  0  0  0  0  0  0  0  0  0  0  0
    0.5960   -2.0630   -0.5020 C   0  0  0  0  0  0  0  0  0  0  0  0
    1.7100   -2.8280   -1.0520 C   0  0  0  0  0  0  0  0  0  0  0  0
    2.9050   -1.8500   -1.5660 C   0  0  0  0  0  3  0  0  0  0  0  0
    2.6800   -0.6460   -1.4920 O   0  5  0  0  0  0  0  0  0  0  0  0
    3.8750   -2.4760   -1.9780 O   0  5  0  0  0  0  0  0  0  0  0  0
   -0.5050   -1.9690   -1.3890 N   0  0  0  0  0  0  0  0  0  0  0  0
   -1.5680   -1.3430   -1.0100 C   0  0  0  0  0  0  0  0  0  0  0  0
   -3.0770   -1.2190   -1.9870 S   0  0  0  0  0  0  0  0  0  0  0  0
   -3.8680   -0.3070   -0.6980 C   0  0  0  0  0  0  0  0  0  0  0  0
   -2.9980   -0.1210    0.4060 C   0  0  0  0  0  0  0  0  0  0  0  0
   -3.4270    0.5850    1.5350 C   0  0  0  0  0  0  0  0  0  0  0  0
   -4.7230    1.0920    1.5400 C   0  0  0  0  0  0  0  0  0  0  0  0
   -5.5790    0.9080    0.4510 C   0  0  0  0  0  0  0  0  0  0  0  0
   -5.1520    0.2050   -0.6770 C   0  0  0  0  0  0  0  0  0  0  0  0
   -1.7560   -0.7240    0.2350 N   0  0  0  0  0  0  0  0  0  0  0  0
   -0.5640   -0.4830    1.0930 C   0  0  2  0  0  0  0  0  0  0  0  0
   -0.8860   -0.6180    2.1650 H   0  0  0  0  0  0  0  0  0  0  0  0
   -0.1080    0.9410    0.8670 C   0  0  0  0  0  0  0  0  0  0  0  0
    1.0640    1.2340    0.2950 C   0  0  0  0  0  0  0  0  0  0  0  0
    1.5360    2.5820   -0.0010 C   0  0  0  0  0  0  0  0  0  0  0  0
    2.4460    2.7390   -1.0560 C   0  0  0  0  0  0  0  0  0  0  0  0
    2.9130    4.0050   -1.3920 C   0  0  0  0  0  0  0  0  0  0  0  0
    2.4860    5.1220   -0.6720 C   0  0  0  0  0  0  0  0  0  0  0  0
    1.5930    4.9680    0.3860 C   0  0  0  0  0  0  0  0  0  0  0  0
    1.1170    3.7020    0.7220 C   0  0  0  0  0  0  0  0  0  0  0  0
    4.3720   -3.0270    1.8620 H   0  0  0  0  0  0  0  0  0  0  0  0
    3.2390   -3.0690    3.2790 H   0  0  0  0  0  0  0  0  0  0  0  0
    3.9190   -1.5030    2.7200 H   0  0  0  0  0  0  0  0  0  0  0  0
    1.4430   -3.4200   -1.9430 H   0  0  0  0  0  0  0  0  0  0  0  0
    2.1930   -3.5090   -0.3350 H   0  0  0  0  0  0  0  0  0  0  0  0
   -2.7650    0.7320    2.3850 H   0  0  0  0  0  0  0  0  0  0  0  0
   -5.0760    1.6450    2.4090 H   0  0  0  0  0  0  0  0  0  0  0  0
   -6.5830    1.3160    0.4810 H   0  0  0  0  0  0  0  0  0  0  0  0
   -5.8280    0.0710   -1.5200 H   0  0  0  0  0  0  0  0  0  0  0  0
   -0.8160    1.6970    1.1850 H   0  0  0  0  0  0  0  0  0  0  0  0
    1.7570    0.4260   -0.0380 H   0  0  0  0  0  0  0  0  0  0  0  0
    2.7840    1.8480   -1.6080 H   0  0  0  0  0  0  0  0  0  0  0  0
    3.6140    4.1240   -2.2140 H   0  0  0  0  0  0  0  0  0  0  0  0
    2.8520    6.1090   -0.9340 H   0  0  0  0  0  0  0  0  0  0  0  0
    1.2670    5.8360    0.9500 H   0  0  0  0  0  0  0  0  0  0  0  0
    0.4250    3.5840    1.5520 H   0  0  0  0  0  0  0  0  0  0  0  0
  1  2  2  0  0  0  0
  2  3  1  0  0  0  0
  2  5  1  0  0  0  0
  3  4  1  0  0  0  0
  4 31  1  0  0  0  0
  4 32  1  0  0  0  0
  4 33  1  0  0  0  0
  5  6  2  0  0  0  0
  5 21  1  0  0  0  0
  6  7  1  0  0  0  0
  6 11  1  0  0  0  0
  7  8  1  0  0  0  0
  7 34  1  0  0  0  0
  7 35  1  0  0  0  0
  8  9  1  0  0  0  0
  8 10  1  0  0  0  0
 11 12  2  0  0  0  0
 12 13  1  0  0  0  0
 12 20  1  0  0  0  0
 13 14  1  0  0  0  0
 14 15  2  0  0  0  0
 14 19  1  0  0  0  0
 15 16  1  0  0  0  0
 15 20  1  0  0  0  0
 16 17  2  0  0  0  0
 16 36  1  0  0  0  0
 17 18  1  0  0  0  0
 17 37  1  0  0  0  0
 18 19  2  0  0  0  0
 18 38  1  0  0  0  0
 19 39  1  0  0  0  0
 20 21  1  0  0  0  0
 21 22  1  1  0  0  0
 21 23  1  0  0  0  0
 23 24  2  0  0  0  0
 23 40  1  0  0  0  0
 24 25  1  0  0  0  0
 24 41  1  0  0  0  0
 25 26  2  0  0  0  0
 25 30  1  0  0  0  0
 26 27  1  0  0  0  0
 26 42  1  0  0  0  0
 27 28  2  0  0  0  0
 27 43  1  0  0  0  0
 28 29  1  0  0  0  0
 28 44  1  0  0  0  0
 29 30  2  0  0  0  0
 29 45  1  0  0  0  0
 30 46  1  0  0  0  0
M  CHG  2   9  -1  10  -1
M  END
$$$$
RDB25
 OpenBabel09302314563D

 50 53  0  0  1  0  0  0  0  0999 V2000
    0.0520   -2.4430    2.5400 O   0  0  0  0  0  0  0  0  0  0  0  0
   -0.9710   -2.4140    1.9100 C   0  0  0  0  0  0  0  0  0  0  0  0
   -1.9310   -3.2940    2.3720 O   0  0  0  0  0  0  0  0  0  0  0  0
   -3.2410   -3.2130    1.8440 C   0  0  0  0  0  0  0  0  0  0  0  0
   -1.3310   -1.5330    0.8020 C   0  0  0  0  0  0  0  0  0  0  0  0
   -1.5670   -1.9770   -0.4690 C   0  0  0  0  0  0  0  0  0  0  0  0
   -1.3290   -3.3320   -0.9550 C   0  0  0  0  0  0  0  0  0  0  0  0
    0.1350   -3.4310   -1.6810 C   0  0  0  0  0  3  0  0  0  0  0  0
    0.8680   -2.4620   -1.5220 O   0  5  0  0  0  0  0  0  0  0  0  0
    0.2870   -4.4930   -2.2720 O   0  5  0  0  0  0  0  0  0  0  0  0
   -2.1110   -1.0920   -1.4330 N   0  0  0  0  0  0  0  0  0  0  0  0
   -2.3090    0.1400   -1.1030 C   0  0  0  0  0  0  0  0  0  0  0  0
   -3.0060    1.3830   -2.2040 S   0  0  0  0  0  0  0  0  0  0  0  0
   -2.8690    2.6140   -0.9460 C   0  0  0  0  0  0  0  0  0  0  0  0
   -2.3180    2.0730    0.2430 C   0  0  0  0  0  0  0  0  0  0  0  0
   -2.1050    2.8880    1.3590 C   0  0  0  0  0  0  0  0  0  0  0  0
   -2.4550    4.2310    1.2690 C   0  0  0  0  0  0  0  0  0  0  0  0
   -3.0050    4.7610    0.1000 C   0  0  0  0  0  0  0  0  0  0  0  0
   -3.2130    3.9510   -1.0180 C   0  0  0  0  0  0  0  0  0  0  0  0
   -2.0740    0.7040    0.1640 N   0  0  0  0  0  0  0  0  0  0  0  0
   -1.2860   -0.0690    1.1640 C   0  0  2  0  0  0  0  0  0  0  0  0
   -1.7770    0.0930    2.1620 H   0  0  0  0  0  0  0  0  0  0  0  0
    0.1340    0.4410    1.1850 C   0  0  0  0  0  0  0  0  0  0  0  0
    1.0180    0.0550    0.2560 C   0  0  0  0  0  0  0  0  0  0  0  0
    2.4160    0.4600    0.2120 C   0  0  0  0  0  0  0  0  0  0  0  0
    2.8610    1.6820    0.7280 C   0  0  0  0  0  0  0  0  0  0  0  0
    4.2070    2.0260    0.6690 C   0  0  0  0  0  0  0  0  0  0  0  0
    5.1040    1.1220    0.0870 C   0  0  0  0  0  0  0  0  0  0  0  0
    6.3940    1.5750    0.0950 O   0  0  0  0  0  0  0  0  0  0  0  0
    7.3760    0.7220   -0.4700 C   0  0  0  0  0  0  0  0  0  0  0  0
    4.6850   -0.1000   -0.4390 C   0  0  0  0  0  0  0  0  0  0  0  0
    3.3330   -0.4220   -0.3780 C   0  0  0  0  0  0  0  0  0  0  0  0
   -3.8210   -3.8450    2.5260 H   0  0  0  0  0  0  0  0  0  0  0  0
   -3.2640   -3.6230    0.8280 H   0  0  0  0  0  0  0  0  0  0  0  0
   -3.6150   -2.1850    1.8580 H   0  0  0  0  0  0  0  0  0  0  0  0
   -2.0370   -3.6580   -1.7320 H   0  0  0  0  0  0  0  0  0  0  0  0
   -1.2850   -4.0960   -0.1670 H   0  0  0  0  0  0  0  0  0  0  0  0
   -1.6690    2.4830    2.2680 H   0  0  0  0  0  0  0  0  0  0  0  0
   -2.2940    4.8830    2.1260 H   0  0  0  0  0  0  0  0  0  0  0  0
   -3.2680    5.8130    0.0570 H   0  0  0  0  0  0  0  0  0  0  0  0
   -3.6350    4.3770   -1.9270 H   0  0  0  0  0  0  0  0  0  0  0  0
    0.3820    1.1010    2.0030 H   0  0  0  0  0  0  0  0  0  0  0  0
    0.7250   -0.6670   -0.5400 H   0  0  0  0  0  0  0  0  0  0  0  0
    2.1470    2.3720    1.1750 H   0  0  0  0  0  0  0  0  0  0  0  0
    4.5630    2.9700    1.0610 H   0  0  0  0  0  0  0  0  0  0  0  0
    8.2980    1.3000   -0.3380 H   0  0  0  0  0  0  0  0  0  0  0  0
    7.1790    0.5530   -1.5330 H   0  0  0  0  0  0  0  0  0  0  0  0
    7.4340   -0.2230    0.0810 H   0  0  0  0  0  0  0  0  0  0  0  0
    5.3820   -0.7940   -0.8910 H   0  0  0  0  0  0  0  0  0  0  0  0
    2.9670   -1.3760   -0.7930 H   0  0  0  0  0  0  0  0  0  0  0  0
  1  2  2  0  0  0  0
  2  3  1  0  0  0  0
  2  5  1  0  0  0  0
  3  4  1  0  0  0  0
  4 33  1  0  0  0  0
  4 34  1  0  0  0  0
  4 35  1  0  0  0  0
  5  6  2  0  0  0  0
  5 21  1  0  0  0  0
  6  7  1  0  0  0  0
  6 11  1  0  0  0  0
  7  8  1  0  0  0  0
  7 36  1  0  0  0  0
  7 37  1  0  0  0  0
  8  9  1  0  0  0  0
  8 10  1  0  0  0  0
 11 12  2  0  0  0  0
 12 13  1  0  0  0  0
 12 20  1  0  0  0  0
 13 14  1  0  0  0  0
 14 15  2  0  0  0  0
 14 19  1  0  0  0  0
 15 16  1  0  0  0  0
 15 20  1  0  0  0  0
 16 17  2  0  0  0  0
 16 38  1  0  0  0  0
 17 18  1  0  0  0  0
 17 39  1  0  0  0  0
 18 19  2  0  0  0  0
 18 40  1  0  0  0  0
 19 41  1  0  0  0  0
 20 21  1  0  0  0  0
 21 22  1  1  0  0  0
 21 23  1  0  0  0  0
 23 24  2  0  0  0  0
 23 42  1  0  0  0  0
 24 25  1  0  0  0  0
 24 43  1  0  0  0  0
 25 26  2  0  0  0  0
 25 32  1  0  0  0  0
 26 27  1  0  0  0  0
 26 44  1  0  0  0  0
 27 28  2  0  0  0  0
 27 45  1  0  0  0  0
 28 29  1  0  0  0  0
 28 31  1  0  0  0  0
 29 30  1  0  0  0  0
 30 46  1  0  0  0  0
 30 47  1  0  0  0  0
 30 48  1  0  0  0  0
 31 32  2  0  0  0  0
 31 49  1  0  0  0  0
 32 50  1  0  0  0  0
M  CHG  2   9  -1  10  -1
M  END
$$$$
RDB26
 OpenBabel09302314563D

 46 49  0  0  1  0  0  0  0  0999 V2000
   -0.3290    3.4920    2.1650 O   0  0  0  0  0  0  0  0  0  0  0  0
   -0.2090    2.3320    1.8470 C   0  0  0  0  0  0  0  0  0  0  0  0
   -0.9240    1.3660    2.5250 O   0  0  0  0  0  0  0  0  0  0  0  0
   -1.8890    1.8570    3.4410 C   0  0  0  0  0  0  0  0  0  0  0  0
    0.6580    1.7270    0.8660 C   0  0  0  0  0  0  0  0  0  0  0  0
    1.1550    2.4300   -0.2120 C   0  0  0  0  0  0  0  0  0  0  0  0
    0.6380    3.6770   -0.7410 C   0  0  0  0  0  0  0  0  0  0  0  0
   -0.6550    3.3090   -1.7010 C   0  0  0  0  0  3  0  0  0  0  0  0
   -1.0760    2.1640   -1.5710 O   0  5  0  0  0  0  0  0  0  0  0  0
   -1.0030    4.2530   -2.3930 O   0  5  0  0  0  0  0  0  0  0  0  0
    2.2420    1.8930   -0.9450 N   0  0  0  0  0  0  0  0  0  0  0  0
    2.6420    0.6920   -0.6930 C   0  0  0  0  0  0  0  0  0  0  0  0
    4.0470   -0.1110   -1.4830 S   0  0  0  0  0  0  0  0  0  0  0  0
    3.7530   -1.5930   -0.5680 C   0  0  0  0  0  0  0  0  0  0  0  0
    2.6350   -1.4500    0.2920 C   0  0  0  0  0  0  0  0  0  0  0  0
    2.2090   -2.5190    1.0870 C   0  0  0  0  0  0  0  0  0  0  0  0
    2.9210   -3.7110    1.0190 C   0  0  0  0  0  0  0  0  0  0  0  0
    4.0310   -3.8470    0.1810 C   0  0  0  0  0  0  0  0  0  0  0  0
    4.4510   -2.7850   -0.6220 C   0  0  0  0  0  0  0  0  0  0  0  0
    2.0680   -0.1820    0.2430 N   0  0  0  0  0  0  0  0  0  0  0  0
    0.8340    0.2300    0.9550 C   0  0  2  0  0  0  0  0  0  0  0  0
    0.9280   -0.1130    2.0190 H   0  0  0  0  0  0  0  0  0  0  0  0
   -0.3670   -0.3580    0.2510 C   0  0  0  0  0  0  0  0  0  0  0  0
   -1.3560   -0.9700    0.9090 C   0  0  0  0  0  0  0  0  0  0  0  0
   -2.5880   -1.3790    0.2370 C   0  0  0  0  0  0  0  0  0  0  0  0
   -3.1650   -0.5470   -0.7330 C   0  0  0  0  0  0  0  0  0  0  0  0
   -4.3450   -0.9210   -1.3660 C   0  0  0  0  0  0  0  0  0  0  0  0
   -4.9260   -2.1360   -1.0060 C   0  0  0  0  0  0  0  0  0  0  0  0
   -6.0550   -2.5040   -1.6020 F   0  0  0  0  0  0  0  0  0  0  0  0
   -4.3810   -2.9850   -0.0460 C   0  0  0  0  0  0  0  0  0  0  0  0
   -3.1990   -2.5900    0.5770 C   0  0  0  0  0  0  0  0  0  0  0  0
   -1.4010    2.4110    4.2470 H   0  0  0  0  0  0  0  0  0  0  0  0
   -2.3700    0.9470    3.8100 H   0  0  0  0  0  0  0  0  0  0  0  0
   -2.6050    2.5010    2.9180 H   0  0  0  0  0  0  0  0  0  0  0  0
    1.3320    4.2310   -1.3870 H   0  0  0  0  0  0  0  0  0  0  0  0
    0.2260    4.3740    0.0010 H   0  0  0  0  0  0  0  0  0  0  0  0
    1.3370   -2.4210    1.7280 H   0  0  0  0  0  0  0  0  0  0  0  0
    2.6050   -4.5580    1.6280 H   0  0  0  0  0  0  0  0  0  0  0  0
    4.5680   -4.7890    0.1490 H   0  0  0  0  0  0  0  0  0  0  0  0
    5.3110   -2.9080   -1.2770 H   0  0  0  0  0  0  0  0  0  0  0  0
   -0.4090   -0.1450   -0.8240 H   0  0  0  0  0  0  0  0  0  0  0  0
   -1.3180   -1.1500    1.9820 H   0  0  0  0  0  0  0  0  0  0  0  0
   -2.6780    0.4110   -0.9910 H   0  0  0  0  0  0  0  0  0  0  0  0
   -4.7940   -0.2780   -2.1210 H   0  0  0  0  0  0  0  0  0  0  0  0
   -4.8560   -3.9250    0.2100 H   0  0  0  0  0  0  0  0  0  0  0  0
   -2.7470   -3.2310    1.3290 H   0  0  0  0  0  0  0  0  0  0  0  0
  1  2  2  0  0  0  0
  2  3  1  0  0  0  0
  2  5  1  0  0  0  0
  3  4  1  0  0  0  0
  4 32  1  0  0  0  0
  4 33  1  0  0  0  0
  4 34  1  0  0  0  0
  5  6  2  0  0  0  0
  5 21  1  0  0  0  0
  6  7  1  0  0  0  0
  6 11  1  0  0  0  0
  7  8  1  0  0  0  0
  7 35  1  0  0  0  0
  7 36  1  0  0  0  0
  8  9  1  0  0  0  0
  8 10  1  0  0  0  0
 11 12  2  0  0  0  0
 12 13  1  0  0  0  0
 12 20  1  0  0  0  0
 13 14  1  0  0  0  0
 14 15  2  0  0  0  0
 14 19  1  0  0  0  0
 15 16  1  0  0  0  0
 15 20  1  0  0  0  0
 16 17  2  0  0  0  0
 16 37  1  0  0  0  0
 17 18  1  0  0  0  0
 17 38  1  0  0  0  0
 18 19  2  0  0  0  0
 18 39  1  0  0  0  0
 19 40  1  0  0  0  0
 20 21  1  0  0  0  0
 21 22  1  1  0  0  0
 21 23  1  0  0  0  0
 23 24  2  0  0  0  0
 23 41  1  0  0  0  0
 24 25  1  0  0  0  0
 24 42  1  0  0  0  0
 25 26  2  0  0  0  0
 25 31  1  0  0  0  0
 26 27  1  0  0  0  0
 26 43  1  0  0  0  0
 27 28  2  0  0  0  0
 27 44  1  0  0  0  0
 28 29  1  0  0  0  0
 28 30  1  0  0  0  0
 30 31  2  0  0  0  0
 30 45  1  0  0  0  0
 31 46  1  0  0  0  0
M  CHG  2   9  -1  10  -1
M  END
$$$$
RDB27
 OpenBabel09302314563D

 46 49  0  0  1  0  0  0  0  0999 V2000
   -1.6370   -2.7010    2.2970 O   0  0  0  0  0  0  0  0  0  0  0  0
   -1.6570   -2.4940    1.1080 C   0  0  0  0  0  0  0  0  0  0  0  0
   -1.0570   -3.4860    0.3620 O   0  0  0  0  0  0  0  0  0  0  0  0
   -0.7230   -3.2100   -0.9860 C   0  0  0  0  0  0  0  0  0  0  0  0
   -2.1330   -1.2920    0.4370 C   0  0  0  0  0  0  0  0  0  0  0  0
   -3.1130   -1.2780   -0.5220 C   0  0  0  0  0  0  0  0  0  0  0  0
   -3.9400   -2.3990   -0.9100 C   0  0  0  0  0  0  0  0  0  0  0  0
   -5.4090   -2.3050   -0.0830 C   0  0  0  0  0  3  0  0  0  0  0  0
   -6.1950   -3.1360   -0.5060 O   0  5  0  0  0  0  0  0  0  0  0  0
   -5.4330   -1.4520    0.7830 O   0  5  0  0  0  0  0  0  0  0  0  0
   -3.3700   -0.0790   -1.2340 N   0  0  0  0  0  0  0  0  0  0  0  0
   -2.8380    1.0180   -0.8220 C   0  0  0  0  0  0  0  0  0  0  0  0
   -3.0920    2.6270   -1.5930 S   0  0  0  0  0  0  0  0  0  0  0  0
   -2.0400    3.3980   -0.4030 C   0  0  0  0  0  0  0  0  0  0  0  0
   -1.5430    2.4550    0.5310 C   0  0  0  0  0  0  0  0  0  0  0  0
   -0.6930    2.8610    1.5650 C   0  0  0  0  0  0  0  0  0  0  0  0
   -0.3470    4.2060    1.6410 C   0  0  0  0  0  0  0  0  0  0  0  0
   -0.8330    5.1330    0.7170 C   0  0  0  0  0  0  0  0  0  0  0  0
   -1.6880    4.7320   -0.3110 C   0  0  0  0  0  0  0  0  0  0  0  0
   -1.9890    1.1590    0.2900 N   0  0  0  0  0  0  0  0  0  0  0  0
   -1.5140   -0.0400    1.0080 C   0  0  2  0  0  0  0  0  0  0  0  0
   -1.8420    0.0660    2.0890 H   0  0  0  0  0  0  0  0  0  0  0  0
   -0.0120   -0.2020    0.9380 C   0  0  0  0  0  0  0  0  0  0  0  0
    0.7590    0.2620   -0.0500 C   0  0  0  0  0  0  0  0  0  0  0  0
    2.2000    0.0260   -0.0970 C   0  0  0  0  0  0  0  0  0  0  0  0
    3.0610    1.0810   -0.4200 C   0  0  0  0  0  0  0  0  0  0  0  0
    4.4380    0.8730   -0.4700 C   0  0  0  0  0  0  0  0  0  0  0  0
    4.9290   -0.3980   -0.2000 C   0  0  0  0  0  0  0  0  0  0  0  0
    6.8100   -0.6880   -0.2710 Br  0  0  0  0  0  0  0  0  0  0  0  0
    4.0970   -1.4640    0.1180 C   0  0  0  0  0  0  0  0  0  0  0  0
    2.7220   -1.2450    0.1700 C   0  0  0  0  0  0  0  0  0  0  0  0
   -1.6180   -3.2760   -1.6150 H   0  0  0  0  0  0  0  0  0  0  0  0
   -0.0180   -4.0110   -1.2340 H   0  0  0  0  0  0  0  0  0  0  0  0
   -0.2480   -2.2290   -1.0900 H   0  0  0  0  0  0  0  0  0  0  0  0
   -3.5690   -3.3870   -0.6230 H   0  0  0  0  0  0  0  0  0  0  0  0
   -4.2570   -2.4050   -1.9590 H   0  0  0  0  0  0  0  0  0  0  0  0
   -0.3130    2.1420    2.2860 H   0  0  0  0  0  0  0  0  0  0  0  0
    0.3160    4.5420    2.4380 H   0  0  0  0  0  0  0  0  0  0  0  0
   -0.5470    6.1760    0.8000 H   0  0  0  0  0  0  0  0  0  0  0  0
   -2.0650    5.4660   -1.0210 H   0  0  0  0  0  0  0  0  0  0  0  0
    0.3910   -0.7930    1.7660 H   0  0  0  0  0  0  0  0  0  0  0  0
    0.3550    0.8500   -0.8760 H   0  0  0  0  0  0  0  0  0  0  0  0
    2.6530    2.0690   -0.6260 H   0  0  0  0  0  0  0  0  0  0  0  0
    5.1020    1.6990   -0.7170 H   0  0  0  0  0  0  0  0  0  0  0  0
    4.4970   -2.4560    0.3250 H   0  0  0  0  0  0  0  0  0  0  0  0
    2.0470   -2.0690    0.4150 H   0  0  0  0  0  0  0  0  0  0  0  0
  1  2  2  0  0  0  0
  2  3  1  0  0  0  0
  2  5  1  0  0  0  0
  3  4  1  0  0  0  0
  4 32  1  0  0  0  0
  4 33  1  0  0  0  0
  4 34  1  0  0  0  0
  5  6  2  0  0  0  0
  5 21  1  0  0  0  0
  6  7  1  0  0  0  0
  6 11  1  0  0  0  0
  7  8  1  0  0  0  0
  7 35  1  0  0  0  0
  7 36  1  0  0  0  0
  8  9  1  0  0  0  0
  8 10  1  0  0  0  0
 11 12  2  0  0  0  0
 12 13  1  0  0  0  0
 12 20  1  0  0  0  0
 13 14  1  0  0  0  0
 14 15  2  0  0  0  0
 14 19  1  0  0  0  0
 15 16  1  0  0  0  0
 15 20  1  0  0  0  0
 16 17  2  0  0  0  0
 16 37  1  0  0  0  0
 17 18  1  0  0  0  0
 17 38  1  0  0  0  0
 18 19  2  0  0  0  0
 18 39  1  0  0  0  0
 19 40  1  0  0  0  0
 20 21  1  0  0  0  0
 21 22  1  1  0  0  0
 21 23  1  0  0  0  0
 23 24  2  0  0  0  0
 23 41  1  0  0  0  0
 24 25  1  0  0  0  0
 24 42  1  0  0  0  0
 25 26  2  0  0  0  0
 25 31  1  0  0  0  0
 26 27  1  0  0  0  0
 26 43  1  0  0  0  0
 27 28  2  0  0  0  0
 27 44  1  0  0  0  0
 28 29  1  0  0  0  0
 28 30  1  0  0  0  0
 30 31  2  0  0  0  0
 30 45  1  0  0  0  0
 31 46  1  0  0  0  0
M  CHG  2   9  -1  10  -1
M  END
$$$$
RDB28
 OpenBabel09302314563D

 48 51  0  0  1  0  0  0  0  0999 V2000
    1.5720    2.3350   -3.2820 O   0  0  0  0  0  0  0  0  0  0  0  0
    1.8760    1.7470   -2.2660 C   0  0  0  0  0  0  0  0  0  0  0  0
    3.0550    1.0780   -2.3450 O   0  0  0  0  0  0  0  0  0  0  0  0
    3.4510    0.2000   -1.3030 C   0  0  0  0  0  0  0  0  0  0  0  0
    1.0320    1.7390   -1.0700 C   0  0  0  0  0  0  0  0  0  0  0  0
    1.3290    2.3790    0.1000 C   0  0  0  0  0  0  0  0  0  0  0  0
    2.6660    2.7970    0.5400 C   0  0  0  0  0  0  0  0  0  0  0  0
    3.3220    1.6110    1.4010 C   0  0  0  0  0  3  0  0  0  0  0  0
    2.6370    0.5890    1.5090 O   0  5  0  0  0  0  0  0  0  0  0  0
    4.4520    1.8580    1.8080 O   0  5  0  0  0  0  0  0  0  0  0  0
    0.2990    2.6960    1.0140 N   0  0  0  0  0  0  0  0  0  0  0  0
   -0.8950    2.2590    0.7840 C   0  0  0  0  0  0  0  0  0  0  0  0
   -2.3220    2.5940    1.8290 S   0  0  0  0  0  0  0  0  0  0  0  0
   -3.3380    1.5560    0.8230 C   0  0  0  0  0  0  0  0  0  0  0  0
   -2.6040    1.0140   -0.2590 C   0  0  0  0  0  0  0  0  0  0  0  0
   -3.2010    0.1150   -1.1460 C   0  0  0  0  0  0  0  0  0  0  0  0
   -4.5370   -0.2130   -0.9440 C   0  0  0  0  0  0  0  0  0  0  0  0
   -5.2700    0.3410    0.1100 C   0  0  0  0  0  0  0  0  0  0  0  0
   -4.6690    1.2260    1.0050 C   0  0  0  0  0  0  0  0  0  0  0  0
   -1.2870    1.4750   -0.3100 N   0  0  0  0  0  0  0  0  0  0  0  0
   -0.2670    0.9940   -1.2670 C   0  0  2  0  0  0  0  0  0  0  0  0
   -0.6690    1.1680   -2.3050 H   0  0  0  0  0  0  0  0  0  0  0  0
    0.0210   -0.4760   -1.0320 C   0  0  0  0  0  0  0  0  0  0  0  0
    0.3210   -0.9280    0.1890 C   0  0  0  0  0  0  0  0  0  0  0  0
    0.7580   -2.2880    0.4870 C   0  0  0  0  0  0  0  0  0  0  0  0
    0.0600   -3.4510    0.1420 C   0  0  0  0  0  0  0  0  0  0  0  0
   -1.2250   -3.3900   -0.5310 N   0  0  0  0  0  0  0  0  0  0  0  0
   -1.9070   -2.3850   -0.4320 O   0  0  0  0  0  1  0  0  0  0  0  0
   -1.5840   -4.3690   -1.1760 O   0  0  0  0  0  1  0  0  0  0  0  0
    0.5770   -4.7200    0.4460 C   0  0  0  0  0  0  0  0  0  0  0  0
    1.7930   -4.8240    1.1030 C   0  0  0  0  0  0  0  0  0  0  0  0
    2.4950   -3.6680    1.4640 C   0  0  0  0  0  0  0  0  0  0  0  0
    1.9820   -2.4160    1.1640 C   0  0  0  0  0  0  0  0  0  0  0  0
    4.2360    0.7080   -0.7260 H   0  0  0  0  0  0  0  0  0  0  0  0
    3.8450   -0.6740   -1.8260 H   0  0  0  0  0  0  0  0  0  0  0  0
    2.6280   -0.0780   -0.6270 H   0  0  0  0  0  0  0  0  0  0  0  0
    2.6570    3.6760    1.2060 H   0  0  0  0  0  0  0  0  0  0  0  0
    3.3600    3.0080   -0.2860 H   0  0  0  0  0  0  0  0  0  0  0  0
   -2.6270   -0.3470   -1.9470 H   0  0  0  0  0  0  0  0  0  0  0  0
   -5.0170   -0.9270   -1.6140 H   0  0  0  0  0  0  0  0  0  0  0  0
   -6.3110    0.0670    0.2410 H   0  0  0  0  0  0  0  0  0  0  0  0
   -5.2450    1.6380    1.8310 H   0  0  0  0  0  0  0  0  0  0  0  0
    0.0090   -1.1000   -1.9180 H   0  0  0  0  0  0  0  0  0  0  0  0
    0.3560   -0.2490    1.0610 H   0  0  0  0  0  0  0  0  0  0  0  0
    0.0240   -5.6170    0.1680 H   0  0  0  0  0  0  0  0  0  0  0  0
    2.2000   -5.8030    1.3410 H   0  0  0  0  0  0  0  0  0  0  0  0
    3.4490   -3.7530    1.9850 H   0  0  0  0  0  0  0  0  0  0  0  0
    2.5300   -1.4940    1.4570 H   0  0  0  0  0  0  0  0  0  0  0  0
  1  2  2  0  0  0  0
  2  3  1  0  0  0  0
  2  5  1  0  0  0  0
  3  4  1  0  0  0  0
  4 34  1  0  0  0  0
  4 35  1  0  0  0  0
  4 36  1  0  0  0  0
  5  6  2  0  0  0  0
  5 21  1  0  0  0  0
  6  7  1  0  0  0  0
  6 11  1  0  0  0  0
  7  8  1  0  0  0  0
  7 37  1  0  0  0  0
  7 38  1  0  0  0  0
  8  9  1  0  0  0  0
  8 10  1  0  0  0  0
 11 12  2  0  0  0  0
 12 13  1  0  0  0  0
 12 20  1  0  0  0  0
 13 14  1  0  0  0  0
 14 15  2  0  0  0  0
 14 19  1  0  0  0  0
 15 16  1  0  0  0  0
 15 20  1  0  0  0  0
 16 17  2  0  0  0  0
 16 39  1  0  0  0  0
 17 18  1  0  0  0  0
 17 40  1  0  0  0  0
 18 19  2  0  0  0  0
 18 41  1  0  0  0  0
 19 42  1  0  0  0  0
 20 21  1  0  0  0  0
 21 22  1  6  0  0  0
 21 23  1  0  0  0  0
 23 24  2  0  0  0  0
 23 43  1  0  0  0  0
 24 25  1  0  0  0  0
 24 44  1  0  0  0  0
 25 26  2  0  0  0  0
 25 33  1  0  0  0  0
 26 27  1  0  0  0  0
 26 30  1  0  0  0  0
 27 28  1  0  0  0  0
 27 29  1  0  0  0  0
 30 31  2  0  0  0  0
 30 45  1  0  0  0  0
 31 32  1  0  0  0  0
 31 46  1  0  0  0  0
 32 33  2  0  0  0  0
 32 47  1  0  0  0  0
 33 48  1  0  0  0  0
M  CHG  2   9  -1  10  -1
M  END
$$$$
RDB29
 OpenBabel09302314563D

 46 49  0  0  1  0  0  0  0  0999 V2000
    0.2320   -3.4050    1.3300 O   0  0  0  0  0  0  0  0  0  0  0  0
    0.9520   -2.4370    1.3760 C   0  0  0  0  0  0  0  0  0  0  0  0
    1.6250   -2.2500    2.5490 O   0  0  0  0  0  0  0  0  0  0  0  0
    2.8590   -1.5440    2.5060 C   0  0  0  0  0  0  0  0  0  0  0  0
    1.0390   -1.3990    0.3470 C   0  0  0  0  0  0  0  0  0  0  0  0
    1.6470   -1.5910   -0.8640 C   0  0  0  0  0  0  0  0  0  0  0  0
    2.3090   -2.8160   -1.2950 C   0  0  0  0  0  0  0  0  0  0  0  0
    3.8720   -2.7970   -0.8280 C   0  0  0  0  0  3  0  0  0  0  0  0
    4.1610   -1.8930   -0.0500 O   0  5  0  0  0  0  0  0  0  0  0  0
    4.5240   -3.7110   -1.3110 O   0  5  0  0  0  0  0  0  0  0  0  0
    1.7110   -0.5210   -1.7920 N   0  0  0  0  0  0  0  0  0  0  0  0
    1.4640    0.6710   -1.3600 C   0  0  0  0  0  0  0  0  0  0  0  0
    1.7870    2.1910   -2.2660 S   0  0  0  0  0  0  0  0  0  0  0  0
    1.4350    3.1540   -0.8260 C   0  0  0  0  0  0  0  0  0  0  0  0
    1.0450    2.3360    0.2630 C   0  0  0  0  0  0  0  0  0  0  0  0
    0.7940    2.8980    1.5180 C   0  0  0  0  0  0  0  0  0  0  0  0
    0.8950    4.2790    1.6510 C   0  0  0  0  0  0  0  0  0  0  0  0
    1.2460    5.0890    0.5680 C   0  0  0  0  0  0  0  0  0  0  0  0
    1.5250    4.5260   -0.6790 C   0  0  0  0  0  0  0  0  0  0  0  0
    0.9770    0.9860   -0.0760 N   0  0  0  0  0  0  0  0  0  0  0  0
    0.3760   -0.1010    0.7160 C   0  0  1  0  0  0  0  0  0  0  0  0
    0.5210    0.1130    1.8150 H   0  0  0  0  0  0  0  0  0  0  0  0
   -1.1060   -0.1760    0.3970 C   0  0  0  0  0  0  0  0  0  0  0  0
   -2.0720    1.4280    0.7740 Br  0  0  0  0  0  0  0  0  0  0  0  0
   -1.7410   -1.2350   -0.0990 C   0  0  0  0  0  0  0  0  0  0  0  0
   -3.1720   -1.3020   -0.3960 C   0  0  0  0  0  0  0  0  0  0  0  0
   -4.0080   -2.0630    0.4240 C   0  0  0  0  0  0  0  0  0  0  0  0
   -5.3700   -2.1360    0.1460 C   0  0  0  0  0  0  0  0  0  0  0  0
   -5.8970   -1.4580   -0.9530 C   0  0  0  0  0  0  0  0  0  0  0  0
   -5.0590   -0.7070   -1.7770 C   0  0  0  0  0  0  0  0  0  0  0  0
   -3.6960   -0.6270   -1.5010 C   0  0  0  0  0  0  0  0  0  0  0  0
    3.6500   -2.2780    2.2880 H   0  0  0  0  0  0  0  0  0  0  0  0
    2.9560   -1.1270    3.5100 H   0  0  0  0  0  0  0  0  0  0  0  0
    2.8950   -0.7650    1.7350 H   0  0  0  0  0  0  0  0  0  0  0  0
    2.3440   -2.9430   -2.3880 H   0  0  0  0  0  0  0  0  0  0  0  0
    1.8910   -3.7300   -0.8500 H   0  0  0  0  0  0  0  0  0  0  0  0
    0.5280    2.2760    2.3690 H   0  0  0  0  0  0  0  0  0  0  0  0
    0.6960    4.7380    2.6180 H   0  0  0  0  0  0  0  0  0  0  0  0
    1.3100    6.1640    0.6980 H   0  0  0  0  0  0  0  0  0  0  0  0
    1.8130    5.1670   -1.5110 H   0  0  0  0  0  0  0  0  0  0  0  0
   -1.1940   -2.1750   -0.3080 H   0  0  0  0  0  0  0  0  0  0  0  0
   -3.5890   -2.5950    1.2790 H   0  0  0  0  0  0  0  0  0  0  0  0
   -6.0240   -2.7220    0.7850 H   0  0  0  0  0  0  0  0  0  0  0  0
   -6.9590   -1.5150   -1.1680 H   0  0  0  0  0  0  0  0  0  0  0  0
   -5.4700   -0.1810   -2.6340 H   0  0  0  0  0  0  0  0  0  0  0  0
   -3.0390   -0.0390   -2.1410 H   0  0  0  0  0  0  0  0  0  0  0  0
  1  2  2  0  0  0  0
  2  3  1  0  0  0  0
  2  5  1  0  0  0  0
  3  4  1  0  0  0  0
  4 32  1  0  0  0  0
  4 33  1  0  0  0  0
  4 34  1  0  0  0  0
  5  6  2  0  0  0  0
  5 21  1  0  0  0  0
  6  7  1  0  0  0  0
  6 11  1  0  0  0  0
  7  8  1  0  0  0  0
  7 35  1  0  0  0  0
  7 36  1  0  0  0  0
  8  9  1  0  0  0  0
  8 10  1  0  0  0  0
 11 12  2  0  0  0  0
 12 13  1  0  0  0  0
 12 20  1  0  0  0  0
 13 14  1  0  0  0  0
 14 15  2  0  0  0  0
 14 19  1  0  0  0  0
 15 16  1  0  0  0  0
 15 20  1  0  0  0  0
 16 17  2  0  0  0  0
 16 37  1  0  0  0  0
 17 18  1  0  0  0  0
 17 38  1  0  0  0  0
 18 19  2  0  0  0  0
 18 39  1  0  0  0  0
 19 40  1  0  0  0  0
 20 21  1  0  0  0  0
 21 22  1  1  0  0  0
 21 23  1  0  0  0  0
 23 24  1  0  0  0  0
 23 25  2  0  0  0  0
 25 26  1  0  0  0  0
 25 41  1  0  0  0  0
 26 27  2  0  0  0  0
 26 31  1  0  0  0  0
 27 28  1  0  0  0  0
 27 42  1  0  0  0  0
 28 29  2  0  0  0  0
 28 43  1  0  0  0  0
 29 30  1  0  0  0  0
 29 44  1  0  0  0  0
 30 31  2  0  0  0  0
 30 45  1  0  0  0  0
 31 46  1  0  0  0  0
M  CHG  2   9  -1  10  -1
M  END
$$$$
RDB30
 OpenBabel09302314563D

 49 52  0  0  1  0  0  0  0  0999 V2000
    0.2400   -1.9020    3.2030 O   0  0  0  0  0  0  0  0  0  0  0  0
    0.3280   -2.0890    2.0080 C   0  0  0  0  0  0  0  0  0  0  0  0
    1.3430   -2.9110    1.6450 O   0  0  0  0  0  0  0  0  0  0  0  0
    1.6570   -3.0910    0.2720 C   0  0  0  0  0  0  0  0  0  0  0  0
   -0.5650   -1.4510    1.0360 C   0  0  0  0  0  0  0  0  0  0  0  0
   -1.5230   -2.1080    0.3170 C   0  0  0  0  0  0  0  0  0  0  0  0
   -1.6260   -3.5550    0.1360 C   0  0  0  0  0  0  0  0  0  0  0  0
   -0.9550   -3.9820   -1.2790 C   0  0  0  0  0  3  0  0  0  0  0  0
   -1.0840   -5.1750   -1.5280 O   0  5  0  0  0  0  0  0  0  0  0  0
   -0.3780   -3.0780   -1.8790 O   0  5  0  0  0  0  0  0  0  0  0  0
   -2.5620   -1.3780   -0.3100 N   0  0  0  0  0  0  0  0  0  0  0  0
   -2.5570   -0.0910   -0.2370 C   0  0  0  0  0  0  0  0  0  0  0  0
   -3.8150    0.9800   -0.9550 S   0  0  0  0  0  0  0  0  0  0  0  0
   -2.9730    2.4160   -0.3630 C   0  0  0  0  0  0  0  0  0  0  0  0
   -1.7990    2.0660    0.3500 C   0  0  0  0  0  0  0  0  0  0  0  0
   -0.9720    3.0560    0.8880 C   0  0  0  0  0  0  0  0  0  0  0  0
   -1.3380    4.3860    0.7070 C   0  0  0  0  0  0  0  0  0  0  0  0
   -2.4980    4.7310    0.0090 C   0  0  0  0  0  0  0  0  0  0  0  0
   -3.3230    3.7420   -0.5320 C   0  0  0  0  0  0  0  0  0  0  0  0
   -1.6080    0.6900    0.4450 N   0  0  0  0  0  0  0  0  0  0  0  0
   -0.4060    0.0480    1.0100 C   0  0  2  0  0  0  0  0  0  0  0  0
   -0.2900    0.4320    2.0670 H   0  0  0  0  0  0  0  0  0  0  0  0
    0.8230    0.3940    0.1710 C   0  0  0  0  0  0  0  0  0  0  0  0
    0.6930    0.2130   -1.2930 C   0  0  0  0  0  0  0  0  0  0  0  0
    1.9330    0.8090    0.7970 C   0  0  0  0  0  0  0  0  0  0  0  0
    3.1900    1.1200    0.1180 C   0  0  0  0  0  0  0  0  0  0  0  0
    3.9480    0.0990   -0.4640 C   0  0  0  0  0  0  0  0  0  0  0  0
    5.1530    0.3980   -1.0920 C   0  0  0  0  0  0  0  0  0  0  0  0
    5.6080    1.7150   -1.1440 C   0  0  0  0  0  0  0  0  0  0  0  0
    4.8530    2.7340   -0.5650 C   0  0  0  0  0  0  0  0  0  0  0  0
    3.6470    2.4400    0.0670 C   0  0  0  0  0  0  0  0  0  0  0  0
    1.1840   -4.0250   -0.0630 H   0  0  0  0  0  0  0  0  0  0  0  0
    2.7470   -3.1770    0.2660 H   0  0  0  0  0  0  0  0  0  0  0  0
    1.3180   -2.2630   -0.3630 H   0  0  0  0  0  0  0  0  0  0  0  0
   -2.6650   -3.9180    0.0700 H   0  0  0  0  0  0  0  0  0  0  0  0
   -1.1070   -4.1430    0.9050 H   0  0  0  0  0  0  0  0  0  0  0  0
   -0.0620    2.7920    1.4220 H   0  0  0  0  0  0  0  0  0  0  0  0
   -0.7050    5.1730    1.1150 H   0  0  0  0  0  0  0  0  0  0  0  0
   -2.7590    5.7760   -0.1170 H   0  0  0  0  0  0  0  0  0  0  0  0
   -4.2210    4.0250   -1.0780 H   0  0  0  0  0  0  0  0  0  0  0  0
    0.0390    0.9710   -1.7440 H   0  0  0  0  0  0  0  0  0  0  0  0
    0.2390   -0.7750   -1.5450 H   0  0  0  0  0  0  0  0  0  0  0  0
    1.6520    0.2560   -1.8240 H   0  0  0  0  0  0  0  0  0  0  0  0
    1.9750    0.9220    1.8820 H   0  0  0  0  0  0  0  0  0  0  0  0
    3.5850   -0.9300   -0.4220 H   0  0  0  0  0  0  0  0  0  0  0  0
    5.7410   -0.3960   -1.5460 H   0  0  0  0  0  0  0  0  0  0  0  0
    6.5460    1.9480   -1.6360 H   0  0  0  0  0  0  0  0  0  0  0  0
    5.2060    3.7610   -0.6090 H   0  0  0  0  0  0  0  0  0  0  0  0
    3.0560    3.2350    0.5130 H   0  0  0  0  0  0  0  0  0  0  0  0
  1  2  2  0  0  0  0
  2  3  1  0  0  0  0
  2  5  1  0  0  0  0
  3  4  1  0  0  0  0
  4 32  1  0  0  0  0
  4 33  1  0  0  0  0
  4 34  1  0  0  0  0
  5  6  2  0  0  0  0
  5 21  1  0  0  0  0
  6  7  1  0  0  0  0
  6 11  1  0  0  0  0
  7  8  1  0  0  0  0
  7 35  1  0  0  0  0
  7 36  1  0  0  0  0
  8  9  1  0  0  0  0
  8 10  1  0  0  0  0
 11 12  2  0  0  0  0
 12 13  1  0  0  0  0
 12 20  1  0  0  0  0
 13 14  1  0  0  0  0
 14 15  2  0  0  0  0
 14 19  1  0  0  0  0
 15 16  1  0  0  0  0
 15 20  1  0  0  0  0
 16 17  2  0  0  0  0
 16 37  1  0  0  0  0
 17 18  1  0  0  0  0
 17 38  1  0  0  0  0
 18 19  2  0  0  0  0
 18 39  1  0  0  0  0
 19 40  1  0  0  0  0
 20 21  1  0  0  0  0
 21 22  1  1  0  0  0
 21 23  1  0  0  0  0
 23 24  1  0  0  0  0
 23 25  2  0  0  0  0
 24 41  1  0  0  0  0
 24 42  1  0  0  0  0
 24 43  1  0  0  0  0
 25 26  1  0  0  0  0
 25 44  1  0  0  0  0
 26 27  2  0  0  0  0
 26 31  1  0  0  0  0
 27 28  1  0  0  0  0
 27 45  1  0  0  0  0
 28 29  2  0  0  0  0
 28 46  1  0  0  0  0
 29 30  1  0  0  0  0
 29 47  1  0  0  0  0
 30 31  2  0  0  0  0
 30 48  1  0  0  0  0
 31 49  1  0  0  0  0
M  CHG  2   9  -1  10  -1
M  END
$$$$
RDT01
 OpenBabel09302314563D

 34 35  0  0  1  0  0  0  0  0999 V2000
   -1.2980    3.7880    0.4390 S   0  0  0  0  0  0  0  0  0  0  0  0
   -0.8460    2.1570    0.5200 C   0  0  0  0  0  0  0  0  0  0  0  0
   -1.6200    1.1630   -0.0420 N   0  0  0  0  0  0  0  0  0  0  0  0
   -1.2920   -0.1860    0.0400 C   0  0  0  0  0  0  0  0  0  0  0  0
   -2.2540   -1.1630   -0.5100 C   0  0  0  0  0  0  0  0  0  0  0  0
   -3.7720   -0.7290   -0.6770 C   0  0  0  0  0  3  0  0  0  0  0  0
   -3.9700    0.4740   -0.9030 O   0  5  0  0  0  0  0  0  0  0  0  0
   -4.5710   -1.6550   -0.6020 O   0  5  0  0  0  0  0  0  0  0  0  0
   -0.0930   -0.5510    0.6030 C   0  0  0  0  0  0  0  0  0  0  0  0
    0.3860   -1.9050    0.7660 C   0  0  0  0  0  0  0  0  0  0  0  0
   -0.2000   -2.7770   -0.1050 O   0  0  0  0  0  0  0  0  0  0  0  0
    0.2210   -4.1290    0.0010 C   0  0  0  0  0  0  0  0  0  0  0  0
    1.2350   -2.2910    1.5440 O   0  0  0  0  0  0  0  0  0  0  0  0
    0.8910    0.4650    1.1080 C   0  0  1  0  0  0  0  0  0  0  0  0
    1.2000    0.1940    2.1630 H   0  0  0  0  0  0  0  0  0  0  0  0
    2.1110    0.4720    0.2000 C   0  0  0  0  0  0  0  0  0  0  0  0
    3.2570   -0.2120    0.6050 C   0  0  0  0  0  0  0  0  0  0  0  0
    4.3760   -0.2490   -0.2230 C   0  0  0  0  0  0  0  0  0  0  0  0
    4.3520    0.3980   -1.4580 C   0  0  0  0  0  0  0  0  0  0  0  0
    3.2030    1.0730   -1.8670 C   0  0  0  0  0  0  0  0  0  0  0  0
    2.0810    1.1080   -1.0410 C   0  0  0  0  0  0  0  0  0  0  0  0
    0.3000    1.8150    1.1730 N   0  0  0  0  0  0  0  0  0  0  0  0
   -2.5790    1.4190   -0.4610 H   0  0  0  0  0  0  0  0  0  0  0  0
   -2.2700   -2.0930    0.0990 H   0  0  0  0  0  0  0  0  0  0  0  0
   -1.9410   -1.4860   -1.5230 H   0  0  0  0  0  0  0  0  0  0  0  0
   -0.3870   -4.6340   -0.7580 H   0  0  0  0  0  0  0  0  0  0  0  0
    0.0140   -4.5160    1.0030 H   0  0  0  0  0  0  0  0  0  0  0  0
    1.2900   -4.2100   -0.2210 H   0  0  0  0  0  0  0  0  0  0  0  0
    3.2660   -0.7450    1.5580 H   0  0  0  0  0  0  0  0  0  0  0  0
    5.2640   -0.7880    0.0910 H   0  0  0  0  0  0  0  0  0  0  0  0
    5.2240    0.3690   -2.1030 H   0  0  0  0  0  0  0  0  0  0  0  0
    3.1790    1.5690   -2.8340 H   0  0  0  0  0  0  0  0  0  0  0  0
    1.1780    1.6230   -1.3730 H   0  0  0  0  0  0  0  0  0  0  0  0
    0.9030    2.5450    1.5390 H   0  0  0  0  0  0  0  0  0  0  0  0
  1  2  2  0  0  0  0
  2  3  1  0  0  0  0
  2 22  1  0  0  0  0
  3  4  1  0  0  0  0
  3 23  1  0  0  0  0
  4  5  1  0  0  0  0
  4  9  2  0  0  0  0
  5  6  1  0  0  0  0
  5 24  1  0  0  0  0
  5 25  1  0  0  0  0
  6  7  1  0  0  0  0
  6  8  1  0  0  0  0
  9 10  1  0  0  0  0
  9 14  1  0  0  0  0
 10 11  1  0  0  0  0
 10 13  2  0  0  0  0
 11 12  1  0  0  0  0
 12 26  1  0  0  0  0
 12 27  1  0  0  0  0
 12 28  1  0  0  0  0
 14 15  1  1  0  0  0
 14 16  1  0  0  0  0
 14 22  1  0  0  0  0
 16 17  2  0  0  0  0
 16 21  1  0  0  0  0
 17 18  1  0  0  0  0
 17 29  1  0  0  0  0
 18 19  2  0  0  0  0
 18 30  1  0  0  0  0
 19 20  1  0  0  0  0
 19 31  1  0  0  0  0
 20 21  2  0  0  0  0
 20 32  1  0  0  0  0
 21 33  1  0  0  0  0
 22 34  1  0  0  0  0
M  CHG  2   7  -1   8  -1
M  END
$$$$
RDT02
 OpenBabel09302314563D

 35 36  0  0  1  0  0  0  0  0999 V2000
    1.5690    3.6310    0.0400 S   0  0  0  0  0  0  0  0  0  0  0  0
    1.1340    2.0190   -0.2650 C   0  0  0  0  0  0  0  0  0  0  0  0
    2.0270    0.9910   -0.0730 N   0  0  0  0  0  0  0  0  0  0  0  0
    1.6010   -0.3340    0.0270 C   0  0  0  0  0  0  0  0  0  0  0  0
    2.5840   -1.3010    0.5510 C   0  0  0  0  0  0  0  0  0  0  0  0
    4.0300   -1.1540   -0.1330 C   0  0  0  0  0  3  0  0  0  0  0  0
    4.3900    0.0210   -0.2930 O   0  5  0  0  0  0  0  0  0  0  0  0
    4.6000   -2.2070   -0.3630 O   0  5  0  0  0  0  0  0  0  0  0  0
    0.3110   -0.6480   -0.2930 C   0  0  0  0  0  0  0  0  0  0  0  0
   -0.2590   -1.9720   -0.0620 C   0  0  0  0  0  0  0  0  0  0  0  0
   -0.5910   -2.3290    1.2230 O   0  0  0  0  0  0  0  0  0  0  0  0
   -0.4560   -1.3510    2.2400 C   0  0  0  0  0  0  0  0  0  0  0  0
   -0.5150   -2.8080   -0.8920 O   0  0  0  0  0  0  0  0  0  0  0  0
   -0.5610    0.3430   -1.0020 C   0  0  1  0  0  0  0  0  0  0  0  0
   -0.4260    0.2050   -2.1220 H   0  0  0  0  0  0  0  0  0  0  0  0
   -2.0220    0.1430   -0.6650 C   0  0  0  0  0  0  0  0  0  0  0  0
   -2.7440   -0.8440   -1.3360 C   0  0  0  0  0  0  0  0  0  0  0  0
   -4.0810   -1.0940   -1.0250 C   0  0  0  0  0  0  0  0  0  0  0  0
   -4.7230   -0.3540   -0.0360 C   0  0  0  0  0  0  0  0  0  0  0  0
   -4.0360    0.6510    0.6430 C   0  0  0  0  0  0  0  0  0  0  0  0
   -2.7010    0.8820    0.3130 C   0  0  0  0  0  0  0  0  0  0  0  0
   -1.9810    1.8650    0.9200 O   0  0  0  0  0  0  0  0  0  0  0  0
   -0.1220    1.7350   -0.7240 N   0  0  0  0  0  0  0  0  0  0  0  0
    3.0850    1.1680   -0.0400 H   0  0  0  0  0  0  0  0  0  0  0  0
    2.2610   -2.3480    0.4130 H   0  0  0  0  0  0  0  0  0  0  0  0
    2.7840   -1.1590    1.6260 H   0  0  0  0  0  0  0  0  0  0  0  0
    0.6050   -1.1990    2.4720 H   0  0  0  0  0  0  0  0  0  0  0  0
   -0.9790   -1.8050    3.0880 H   0  0  0  0  0  0  0  0  0  0  0  0
   -0.9340   -0.4070    1.9550 H   0  0  0  0  0  0  0  0  0  0  0  0
   -2.2460   -1.4510   -2.1010 H   0  0  0  0  0  0  0  0  0  0  0  0
   -4.6150   -1.8810   -1.5500 H   0  0  0  0  0  0  0  0  0  0  0  0
   -5.7620   -0.5590    0.2110 H   0  0  0  0  0  0  0  0  0  0  0  0
   -4.5270    1.2350    1.4110 H   0  0  0  0  0  0  0  0  0  0  0  0
   -2.4980    2.3550    1.6020 H   0  0  0  0  0  0  0  0  0  0  0  0
   -0.8730    2.4050   -0.5280 H   0  0  0  0  0  0  0  0  0  0  0  0
  1  2  2  0  0  0  0
  2  3  1  0  0  0  0
  2 23  1  0  0  0  0
  3  4  1  0  0  0  0
  3 24  1  0  0  0  0
  4  5  1  0  0  0  0
  4  9  2  0  0  0  0
  5  6  1  0  0  0  0
  5 25  1  0  0  0  0
  5 26  1  0  0  0  0
  6  7  1  0  0  0  0
  6  8  1  0  0  0  0
  9 10  1  0  0  0  0
  9 14  1  0  0  0  0
 10 11  1  0  0  0  0
 10 13  2  0  0  0  0
 11 12  1  0  0  0  0
 12 27  1  0  0  0  0
 12 28  1  0  0  0  0
 12 29  1  0  0  0  0
 14 15  1  6  0  0  0
 14 16  1  0  0  0  0
 14 23  1  0  0  0  0
 16 17  2  0  0  0  0
 16 21  1  0  0  0  0
 17 18  1  0  0  0  0
 17 30  1  0  0  0  0
 18 19  2  0  0  0  0
 18 31  1  0  0  0  0
 19 20  1  0  0  0  0
 19 32  1  0  0  0  0
 20 21  2  0  0  0  0
 20 33  1  0  0  0  0
 21 22  1  0  0  0  0
 22 34  1  0  0  0  0
 23 35  1  0  0  0  0
M  CHG  2   7  -1   8  -1
M  END
$$$$
RDT03
 OpenBabel09302314563D

 35 36  0  0  1  0  0  0  0  0999 V2000
    0.2260    4.2360    0.3700 S   0  0  0  0  0  0  0  0  0  0  0  0
   -0.0710    2.5590    0.3590 C   0  0  0  0  0  0  0  0  0  0  0  0
   -1.0240    2.0280   -0.4820 N   0  0  0  0  0  0  0  0  0  0  0  0
   -1.3620    0.6510   -0.4850 C   0  0  0  0  0  0  0  0  0  0  0  0
   -2.5090    0.3080   -1.3140 C   0  0  0  0  0  0  0  0  0  0  0  0
   -3.7520   -0.1410   -0.3310 C   0  0  0  0  0  3  0  0  0  0  0  0
   -3.4040   -0.8560    0.6000 O   0  5  0  0  0  0  0  0  0  0  0  0
   -4.8310    0.2930   -0.7030 O   0  5  0  0  0  0  0  0  0  0  0  0
   -0.6320   -0.1990    0.2860 C   0  0  0  0  0  0  0  0  0  0  0  0
   -0.9800   -1.6070    0.4730 C   0  0  0  0  0  0  0  0  0  0  0  0
   -1.4010   -2.1850   -0.6870 O   0  0  0  0  0  0  0  0  0  0  0  0
   -2.0670   -3.4310   -0.5180 C   0  0  0  0  0  0  0  0  0  0  0  0
   -0.7890   -2.2590    1.4750 O   0  0  0  0  0  0  0  0  0  0  0  0
    0.5180    0.2570    1.1310 C   0  0  1  0  0  0  0  0  0  0  0  0
    0.3510   -0.0910    2.1980 H   0  0  0  0  0  0  0  0  0  0  0  0
    1.8080   -0.3470    0.5930 C   0  0  0  0  0  0  0  0  0  0  0  0
    2.2380   -1.5680    1.1270 C   0  0  0  0  0  0  0  0  0  0  0  0
    3.3930   -2.1770    0.6500 C   0  0  0  0  0  0  0  0  0  0  0  0
    4.1460   -1.5770   -0.3600 C   0  0  0  0  0  0  0  0  0  0  0  0
    3.6940   -0.3630   -0.8750 C   0  0  0  0  0  0  0  0  0  0  0  0
    4.3670    0.2950   -1.8610 O   0  0  0  0  0  0  0  0  0  0  0  0
    2.5320    0.2680   -0.4210 C   0  0  0  0  0  0  0  0  0  0  0  0
    0.6250    1.7300    1.1760 N   0  0  0  0  0  0  0  0  0  0  0  0
   -1.6190    2.6700   -1.0100 H   0  0  0  0  0  0  0  0  0  0  0  0
   -2.3570   -0.5870   -1.9380 H   0  0  0  0  0  0  0  0  0  0  0  0
   -2.8900    1.1020   -1.9650 H   0  0  0  0  0  0  0  0  0  0  0  0
   -2.3910   -3.6810   -1.5310 H   0  0  0  0  0  0  0  0  0  0  0  0
   -2.9300   -3.2890    0.1510 H   0  0  0  0  0  0  0  0  0  0  0  0
   -1.3810   -4.1770   -0.1100 H   0  0  0  0  0  0  0  0  0  0  0  0
    1.6440   -2.0590    1.9020 H   0  0  0  0  0  0  0  0  0  0  0  0
    3.7120   -3.1320    1.0630 H   0  0  0  0  0  0  0  0  0  0  0  0
    5.0460   -2.0430   -0.7330 H   0  0  0  0  0  0  0  0  0  0  0  0
    5.1530   -0.2070   -2.1720 H   0  0  0  0  0  0  0  0  0  0  0  0
    2.2130    1.2060   -0.8730 H   0  0  0  0  0  0  0  0  0  0  0  0
    1.3660    2.1070    1.7590 H   0  0  0  0  0  0  0  0  0  0  0  0
  1  2  2  0  0  0  0
  2  3  1  0  0  0  0
  2 23  1  0  0  0  0
  3  4  1  0  0  0  0
  3 24  1  0  0  0  0
  4  5  1  0  0  0  0
  4  9  2  0  0  0  0
  5  6  1  0  0  0  0
  5 25  1  0  0  0  0
  5 26  1  0  0  0  0
  6  7  1  0  0  0  0
  6  8  1  0  0  0  0
  9 10  1  0  0  0  0
  9 14  1  0  0  0  0
 10 11  1  0  0  0  0
 10 13  2  0  0  0  0
 11 12  1  0  0  0  0
 12 27  1  0  0  0  0
 12 28  1  0  0  0  0
 12 29  1  0  0  0  0
 14 15  1  1  0  0  0
 14 16  1  0  0  0  0
 14 23  1  0  0  0  0
 16 17  2  0  0  0  0
 16 22  1  0  0  0  0
 17 18  1  0  0  0  0
 17 30  1  0  0  0  0
 18 19  2  0  0  0  0
 18 31  1  0  0  0  0
 19 20  1  0  0  0  0
 19 32  1  0  0  0  0
 20 21  1  0  0  0  0
 20 22  2  0  0  0  0
 21 33  1  0  0  0  0
 22 34  1  0  0  0  0
 23 35  1  0  0  0  0
M  CHG  2   7  -1   8  -1
M  END
$$$$
RDT04
 OpenBabel09302314563D

 35 36  0  0  1  0  0  0  0  0999 V2000
   -1.5000    3.8110    0.4260 S   0  0  0  0  0  0  0  0  0  0  0  0
   -1.1040    2.1670    0.5360 C   0  0  0  0  0  0  0  0  0  0  0  0
   -1.8610    1.1980   -0.0890 N   0  0  0  0  0  0  0  0  0  0  0  0
   -1.5760   -0.1600    0.0060 C   0  0  0  0  0  0  0  0  0  0  0  0
   -2.5170   -1.1060   -0.6280 C   0  0  0  0  0  0  0  0  0  0  0  0
   -4.0080   -0.6310   -0.8990 C   0  0  0  0  0  3  0  0  0  0  0  0
   -4.1570    0.5790   -1.1280 O   0  5  0  0  0  0  0  0  0  0  0  0
   -4.8340   -1.5350   -0.8880 O   0  5  0  0  0  0  0  0  0  0  0  0
   -0.4340   -0.5610    0.6550 C   0  0  0  0  0  0  0  0  0  0  0  0
   -0.0000   -1.9290    0.8380 C   0  0  0  0  0  0  0  0  0  0  0  0
   -0.5490   -2.7790   -0.0780 O   0  0  0  0  0  0  0  0  0  0  0  0
   -0.1710   -4.1440    0.0460 C   0  0  0  0  0  0  0  0  0  0  0  0
    0.7840   -2.3400    1.6670 O   0  0  0  0  0  0  0  0  0  0  0  0
    0.5300    0.4220    1.2560 C   0  0  1  0  0  0  0  0  0  0  0  0
    0.7270    0.1380    2.3340 H   0  0  0  0  0  0  0  0  0  0  0  0
    1.8320    0.3990    0.4730 C   0  0  0  0  0  0  0  0  0  0  0  0
    2.9170   -0.3050    0.9940 C   0  0  0  0  0  0  0  0  0  0  0  0
    4.1170   -0.3730    0.2900 C   0  0  0  0  0  0  0  0  0  0  0  0
    4.1940    0.2770   -0.9420 C   0  0  0  0  0  0  0  0  0  0  0  0
    5.3320    0.2670   -1.6920 O   0  0  0  0  0  0  0  0  0  0  0  0
    3.1170    0.9770   -1.4930 C   0  0  0  0  0  0  0  0  0  0  0  0
    1.9300    1.0250   -0.7730 C   0  0  0  0  0  0  0  0  0  0  0  0
   -0.0220    1.7900    1.2740 N   0  0  0  0  0  0  0  0  0  0  0  0
   -2.7780    1.4830   -0.5770 H   0  0  0  0  0  0  0  0  0  0  0  0
   -2.6020   -2.0430   -0.0350 H   0  0  0  0  0  0  0  0  0  0  0  0
   -2.1380   -1.4250   -1.6200 H   0  0  0  0  0  0  0  0  0  0  0  0
   -0.7390   -4.6280   -0.7550 H   0  0  0  0  0  0  0  0  0  0  0  0
   -0.4560   -4.5300    1.0300 H   0  0  0  0  0  0  0  0  0  0  0  0
    0.9080   -4.2510   -0.1030 H   0  0  0  0  0  0  0  0  0  0  0  0
    2.8190   -0.8310    1.9480 H   0  0  0  0  0  0  0  0  0  0  0  0
    4.9600   -0.9230    0.6860 H   0  0  0  0  0  0  0  0  0  0  0  0
    6.0450   -0.2640   -1.2720 H   0  0  0  0  0  0  0  0  0  0  0  0
    3.2170    1.4590   -2.4610 H   0  0  0  0  0  0  0  0  0  0  0  0
    1.0670    1.5510   -1.1890 H   0  0  0  0  0  0  0  0  0  0  0  0
    0.5710    2.5010    1.6900 H   0  0  0  0  0  0  0  0  0  0  0  0
  1  2  2  0  0  0  0
  2  3  1  0  0  0  0
  2 23  1  0  0  0  0
  3  4  1  0  0  0  0
  3 24  1  0  0  0  0
  4  5  1  0  0  0  0
  4  9  2  0  0  0  0
  5  6  1  0  0  0  0
  5 25  1  0  0  0  0
  5 26  1  0  0  0  0
  6  7  1  0  0  0  0
  6  8  1  0  0  0  0
  9 10  1  0  0  0  0
  9 14  1  0  0  0  0
 10 11  1  0  0  0  0
 10 13  2  0  0  0  0
 11 12  1  0  0  0  0
 12 27  1  0  0  0  0
 12 28  1  0  0  0  0
 12 29  1  0  0  0  0
 14 15  1  1  0  0  0
 14 16  1  0  0  0  0
 14 23  1  0  0  0  0
 16 17  2  0  0  0  0
 16 22  1  0  0  0  0
 17 18  1  0  0  0  0
 17 30  1  0  0  0  0
 18 19  2  0  0  0  0
 18 31  1  0  0  0  0
 19 20  1  0  0  0  0
 19 21  1  0  0  0  0
 20 32  1  0  0  0  0
 21 22  2  0  0  0  0
 21 33  1  0  0  0  0
 22 34  1  0  0  0  0
 23 35  1  0  0  0  0
M  CHG  2   7  -1   8  -1
M  END
$$$$
RDT05
 OpenBabel09302314563D

 36 37  0  0  1  0  0  0  0  0999 V2000
    1.3670    3.7430   -0.7440 S   0  0  0  0  0  0  0  0  0  0  0  0
    1.0350    2.0780   -0.7680 C   0  0  0  0  0  0  0  0  0  0  0  0
    1.8410    1.1760   -0.1040 N   0  0  0  0  0  0  0  0  0  0  0  0
    1.6010   -0.1900   -0.1020 C   0  0  0  0  0  0  0  0  0  0  0  0
    2.5600   -1.0650    0.6060 C   0  0  0  0  0  0  0  0  0  0  0  0
    3.9560   -0.4840    1.0820 C   0  0  0  0  0  3  0  0  0  0  0  0
    4.0150    0.7430    1.2480 O   0  5  0  0  0  0  0  0  0  0  0  0
    4.8140   -1.3400    1.2680 O   0  5  0  0  0  0  0  0  0  0  0  0
    0.4900   -0.6800   -0.7510 C   0  0  0  0  0  0  0  0  0  0  0  0
    0.1170   -2.0680   -0.8840 C   0  0  0  0  0  0  0  0  0  0  0  0
    0.8150   -2.8930   -0.0490 O   0  0  0  0  0  0  0  0  0  0  0  0
    0.4900   -4.2730   -0.1340 C   0  0  0  0  0  0  0  0  0  0  0  0
   -0.7310   -2.5260   -1.6240 O   0  0  0  0  0  0  0  0  0  0  0  0
   -0.5190    0.2350   -1.3880 C   0  0  1  0  0  0  0  0  0  0  0  0
   -0.7440   -0.1250   -2.4370 H   0  0  0  0  0  0  0  0  0  0  0  0
   -1.7920    0.2310   -0.5670 C   0  0  0  0  0  0  0  0  0  0  0  0
   -2.8890   -0.5130   -0.9890 C   0  0  0  0  0  0  0  0  0  0  0  0
   -4.0600   -0.5670   -0.2320 C   0  0  0  0  0  0  0  0  0  0  0  0
   -4.1040    0.1370    0.9730 C   0  0  0  0  0  0  0  0  0  0  0  0
   -5.2110    0.1370    1.7630 O   0  0  0  0  0  0  0  0  0  0  0  0
   -3.0280    0.8840    1.4530 C   0  0  0  0  0  0  0  0  0  0  0  0
   -1.8760    0.9040    0.6660 C   0  0  0  0  0  0  0  0  0  0  0  0
   -0.7700    1.5780    1.0400 O   0  0  0  0  0  0  0  0  0  0  0  0
    0.0010    1.6110   -1.5270 N   0  0  0  0  0  0  0  0  0  0  0  0
    2.7050    1.5360    0.4240 H   0  0  0  0  0  0  0  0  0  0  0  0
    2.8020   -1.9590   -0.0110 H   0  0  0  0  0  0  0  0  0  0  0  0
    2.0990   -1.4680    1.5310 H   0  0  0  0  0  0  0  0  0  0  0  0
    1.1700   -4.7280    0.5960 H   0  0  0  0  0  0  0  0  0  0  0  0
    0.6780   -4.6470   -1.1440 H   0  0  0  0  0  0  0  0  0  0  0  0
   -0.5570   -4.4320    0.1380 H   0  0  0  0  0  0  0  0  0  0  0  0
   -2.8250   -1.0850   -1.9200 H   0  0  0  0  0  0  0  0  0  0  0  0
   -4.9040   -1.1520   -0.5680 H   0  0  0  0  0  0  0  0  0  0  0  0
   -5.9290   -0.4270    1.3930 H   0  0  0  0  0  0  0  0  0  0  0  0
   -3.0930    1.4080    2.3970 H   0  0  0  0  0  0  0  0  0  0  0  0
   -0.8700    2.0430    1.9090 H   0  0  0  0  0  0  0  0  0  0  0  0
   -0.6470    2.2790   -1.9330 H   0  0  0  0  0  0  0  0  0  0  0  0
  1  2  2  0  0  0  0
  2  3  1  0  0  0  0
  2 24  1  0  0  0  0
  3  4  1  0  0  0  0
  3 25  1  0  0  0  0
  4  5  1  0  0  0  0
  4  9  2  0  0  0  0
  5  6  1  0  0  0  0
  5 26  1  0  0  0  0
  5 27  1  0  0  0  0
  6  7  1  0  0  0  0
  6  8  1  0  0  0  0
  9 10  1  0  0  0  0
  9 14  1  0  0  0  0
 10 11  1  0  0  0  0
 10 13  2  0  0  0  0
 11 12  1  0  0  0  0
 12 28  1  0  0  0  0
 12 29  1  0  0  0  0
 12 30  1  0  0  0  0
 14 15  1  6  0  0  0
 14 16  1  0  0  0  0
 14 24  1  0  0  0  0
 16 17  2  0  0  0  0
 16 22  1  0  0  0  0
 17 18  1  0  0  0  0
 17 31  1  0  0  0  0
 18 19  2  0  0  0  0
 18 32  1  0  0  0  0
 19 20  1  0  0  0  0
 19 21  1  0  0  0  0
 20 33  1  0  0  0  0
 21 22  2  0  0  0  0
 21 34  1  0  0  0  0
 22 23  1  0  0  0  0
 23 35  1  0  0  0  0
 24 36  1  0  0  0  0
M  CHG  2   7  -1   8  -1
M  END
$$$$
RDT06
 OpenBabel09302314563D

 36 37  0  0  1  0  0  0  0  0999 V2000
    1.7650    3.7070   -0.2040 S   0  0  0  0  0  0  0  0  0  0  0  0
    1.4140    2.0590   -0.3950 C   0  0  0  0  0  0  0  0  0  0  0  0
    2.1760    1.0840    0.2050 N   0  0  0  0  0  0  0  0  0  0  0  0
    1.8500   -0.2730    0.1250 C   0  0  0  0  0  0  0  0  0  0  0  0
    2.7640   -1.1990    0.8170 C   0  0  0  0  0  0  0  0  0  0  0  0
    4.3140   -0.8950    0.5110 C   0  0  0  0  0  3  0  0  0  0  0  0
    4.6020    0.3080    0.5770 O   0  5  0  0  0  0  0  0  0  0  0  0
    5.0020   -1.8800    0.3060 O   0  5  0  0  0  0  0  0  0  0  0  0
    0.7160   -0.6590   -0.5270 C   0  0  0  0  0  0  0  0  0  0  0  0
    0.2800   -2.0460   -0.6700 C   0  0  0  0  0  0  0  0  0  0  0  0
   -0.1030   -2.7630    0.4340 O   0  0  0  0  0  0  0  0  0  0  0  0
   -0.2960   -2.0720    1.6570 C   0  0  0  0  0  0  0  0  0  0  0  0
    0.1700   -2.6430   -1.7140 O   0  0  0  0  0  0  0  0  0  0  0  0
   -0.1450    0.3090   -1.2800 C   0  0  1  0  0  0  0  0  0  0  0  0
   -0.1080    0.0520   -2.3840 H   0  0  0  0  0  0  0  0  0  0  0  0
   -1.5800    0.2030   -0.7840 C   0  0  0  0  0  0  0  0  0  0  0  0
   -2.4360   -0.6870   -1.4330 C   0  0  0  0  0  0  0  0  0  0  0  0
   -3.7490   -0.8570   -0.9940 C   0  0  0  0  0  0  0  0  0  0  0  0
   -4.1880   -0.1220    0.0990 C   0  0  0  0  0  0  0  0  0  0  0  0
   -5.4540   -0.2070    0.6080 O   0  0  0  0  0  0  0  0  0  0  0  0
   -3.3290    0.7740    0.7590 C   0  0  0  0  0  0  0  0  0  0  0  0
   -3.7130    1.5060    1.8360 O   0  0  0  0  0  0  0  0  0  0  0  0
   -2.0180    0.9370    0.3190 C   0  0  0  0  0  0  0  0  0  0  0  0
    0.3400    1.6970   -1.1530 N   0  0  0  0  0  0  0  0  0  0  0  0
    3.1680    1.3180    0.5530 H   0  0  0  0  0  0  0  0  0  0  0  0
    2.5800   -2.2550    0.5530 H   0  0  0  0  0  0  0  0  0  0  0  0
    2.6980   -1.1150    1.9150 H   0  0  0  0  0  0  0  0  0  0  0  0
   -0.9530   -2.7450    2.2190 H   0  0  0  0  0  0  0  0  0  0  0  0
   -0.7840   -1.1020    1.5080 H   0  0  0  0  0  0  0  0  0  0  0  0
    0.6670   -1.9550    2.1650 H   0  0  0  0  0  0  0  0  0  0  0  0
   -2.0690   -1.2810   -2.2740 H   0  0  0  0  0  0  0  0  0  0  0  0
   -4.4090   -1.5580   -1.4940 H   0  0  0  0  0  0  0  0  0  0  0  0
   -5.9810   -0.8970    0.1430 H   0  0  0  0  0  0  0  0  0  0  0  0
   -4.6540    1.3150    2.0810 H   0  0  0  0  0  0  0  0  0  0  0  0
   -1.3560    1.6260    0.8470 H   0  0  0  0  0  0  0  0  0  0  0  0
   -0.2710    2.4160   -1.5290 H   0  0  0  0  0  0  0  0  0  0  0  0
  1  2  2  0  0  0  0
  2  3  1  0  0  0  0
  2 24  1  0  0  0  0
  3  4  1  0  0  0  0
  3 25  1  0  0  0  0
  4  5  1  0  0  0  0
  4  9  2  0  0  0  0
  5  6  1  0  0  0  0
  5 26  1  0  0  0  0
  5 27  1  0  0  0  0
  6  7  1  0  0  0  0
  6  8  1  0  0  0  0
  9 10  1  0  0  0  0
  9 14  1  0  0  0  0
 10 11  1  0  0  0  0
 10 13  2  0  0  0  0
 11 12  1  0  0  0  0
 12 28  1  0  0  0  0
 12 29  1  0  0  0  0
 12 30  1  0  0  0  0
 14 15  1  6  0  0  0
 14 16  1  0  0  0  0
 14 24  1  0  0  0  0
 16 17  2  0  0  0  0
 16 23  1  0  0  0  0
 17 18  1  0  0  0  0
 17 31  1  0  0  0  0
 18 19  2  0  0  0  0
 18 32  1  0  0  0  0
 19 20  1  0  0  0  0
 19 21  1  0  0  0  0
 20 33  1  0  0  0  0
 21 22  1  0  0  0  0
 21 23  2  0  0  0  0
 22 34  1  0  0  0  0
 23 35  1  0  0  0  0
 24 36  1  0  0  0  0
M  CHG  2   7  -1   8  -1
M  END
$$$$
RDT07
 OpenBabel09302314563D

 39 40  0  0  1  0  0  0  0  0999 V2000
    1.3040    4.3230    0.6930 S   0  0  0  0  0  0  0  0  0  0  0  0
    1.1690    2.6920    0.2180 C   0  0  0  0  0  0  0  0  0  0  0  0
    1.9460    1.7290    0.8230 N   0  0  0  0  0  0  0  0  0  0  0  0
    1.8880    0.3600    0.4620 C   0  0  0  0  0  0  0  0  0  0  0  0
    2.8330   -0.5000    1.1690 C   0  0  0  0  0  0  0  0  0  0  0  0
    3.8380   -1.2130    0.0970 C   0  0  0  0  0  3  0  0  0  0  0  0
    3.2760   -1.5980   -0.9240 O   0  5  0  0  0  0  0  0  0  0  0  0
    4.9930   -1.2830    0.4900 O   0  5  0  0  0  0  0  0  0  0  0  0
    0.9880   -0.0250   -0.4790 C   0  0  0  0  0  0  0  0  0  0  0  0
    0.9080   -1.3930   -1.0030 C   0  0  0  0  0  0  0  0  0  0  0  0
    0.8280   -2.2930    0.0290 O   0  0  0  0  0  0  0  0  0  0  0  0
    1.0270   -3.6470   -0.3540 C   0  0  0  0  0  0  0  0  0  0  0  0
    0.7200   -1.7200   -2.1480 O   0  0  0  0  0  0  0  0  0  0  0  0
    0.0350    0.9220   -1.1410 C   0  0  1  0  0  0  0  0  0  0  0  0
    0.1690    0.8410   -2.2650 H   0  0  0  0  0  0  0  0  0  0  0  0
   -1.4110    0.6130   -0.7830 C   0  0  0  0  0  0  0  0  0  0  0  0
   -2.4370    1.1350   -1.5640 C   0  0  0  0  0  0  0  0  0  0  0  0
   -3.7700    0.8520   -1.2520 C   0  0  0  0  0  0  0  0  0  0  0  0
   -4.0570    0.0250   -0.1740 C   0  0  0  0  0  0  0  0  0  0  0  0
   -5.3300   -0.3050    0.1840 O   0  0  0  0  0  0  0  0  0  0  0  0
   -3.0180   -0.5230    0.6120 C   0  0  0  0  0  0  0  0  0  0  0  0
   -3.4250   -1.3360    1.6250 O   0  0  0  0  0  0  0  0  0  0  0  0
   -2.3870   -2.0490    2.2910 C   0  0  0  0  0  0  0  0  0  0  0  0
   -1.7020   -0.2040    0.3130 C   0  0  0  0  0  0  0  0  0  0  0  0
    0.3090    2.3290   -0.7640 N   0  0  0  0  0  0  0  0  0  0  0  0
    2.6720    2.0280    1.4760 H   0  0  0  0  0  0  0  0  0  0  0  0
    2.3530   -1.3590    1.6670 H   0  0  0  0  0  0  0  0  0  0  0  0
    3.4640   -0.0010    1.9140 H   0  0  0  0  0  0  0  0  0  0  0  0
    1.0470   -4.1820    0.5970 H   0  0  0  0  0  0  0  0  0  0  0  0
    1.9900   -3.7380   -0.8810 H   0  0  0  0  0  0  0  0  0  0  0  0
    0.2080   -3.9780   -0.9980 H   0  0  0  0  0  0  0  0  0  0  0  0
   -2.2140    1.7550   -2.4280 H   0  0  0  0  0  0  0  0  0  0  0  0
   -4.5710    1.2650   -1.8550 H   0  0  0  0  0  0  0  0  0  0  0  0
   -5.9880    0.1150   -0.4190 H   0  0  0  0  0  0  0  0  0  0  0  0
   -2.9520   -2.7300    2.9370 H   0  0  0  0  0  0  0  0  0  0  0  0
   -1.7760   -1.3650    2.8900 H   0  0  0  0  0  0  0  0  0  0  0  0
   -1.7670   -2.6150    1.5830 H   0  0  0  0  0  0  0  0  0  0  0  0
   -0.8830   -0.6040    0.9190 H   0  0  0  0  0  0  0  0  0  0  0  0
   -0.3230    3.0230   -1.1530 H   0  0  0  0  0  0  0  0  0  0  0  0
  1  2  2  0  0  0  0
  2  3  1  0  0  0  0
  2 25  1  0  0  0  0
  3  4  1  0  0  0  0
  3 26  1  0  0  0  0
  4  5  1  0  0  0  0
  4  9  2  0  0  0  0
  5  6  1  0  0  0  0
  5 27  1  0  0  0  0
  5 28  1  0  0  0  0
  6  7  1  0  0  0  0
  6  8  1  0  0  0  0
  9 10  1  0  0  0  0
  9 14  1  0  0  0  0
 10 11  1  0  0  0  0
 10 13  2  0  0  0  0
 11 12  1  0  0  0  0
 12 29  1  0  0  0  0
 12 30  1  0  0  0  0
 12 31  1  0  0  0  0
 14 15  1  6  0  0  0
 14 16  1  0  0  0  0
 14 25  1  0  0  0  0
 16 17  2  0  0  0  0
 16 24  1  0  0  0  0
 17 18  1  0  0  0  0
 17 32  1  0  0  0  0
 18 19  2  0  0  0  0
 18 33  1  0  0  0  0
 19 20  1  0  0  0  0
 19 21  1  0  0  0  0
 20 34  1  0  0  0  0
 21 22  1  0  0  0  0
 21 24  2  0  0  0  0
 22 23  1  0  0  0  0
 23 35  1  0  0  0  0
 23 36  1  0  0  0  0
 23 37  1  0  0  0  0
 24 38  1  0  0  0  0
 25 39  1  0  0  0  0
M  CHG  2   7  -1   8  -1
M  END
$$$$
RDT08
 OpenBabel09302314563D

 38 39  0  0  1  0  0  0  0  0999 V2000
   -1.1250    3.9720   -0.6040 S   0  0  0  0  0  0  0  0  0  0  0  0
   -0.4300    2.4090   -0.5840 C   0  0  0  0  0  0  0  0  0  0  0  0
    0.7050    2.1800    0.1560 N   0  0  0  0  0  0  0  0  0  0  0  0
    1.2960    0.8960    0.2810 C   0  0  0  0  0  0  0  0  0  0  0  0
    2.5110    0.8650    1.0940 C   0  0  0  0  0  0  0  0  0  0  0  0
    3.7700    0.3600    0.1880 C   0  0  0  0  0  3  0  0  0  0  0  0
    3.4840   -0.5080   -0.6320 O   0  5  0  0  0  0  0  0  0  0  0  0
    4.8240    0.9070    0.4830 O   0  5  0  0  0  0  0  0  0  0  0  0
    0.7140   -0.1490   -0.3590 C   0  0  0  0  0  0  0  0  0  0  0  0
    1.2760   -1.5020   -0.3830 C   0  0  0  0  0  0  0  0  0  0  0  0
    1.7110   -1.8880    0.8510 O   0  0  0  0  0  0  0  0  0  0  0  0
    2.5340   -3.0490    0.8480 C   0  0  0  0  0  0  0  0  0  0  0  0
    1.2120   -2.2800   -1.3080 O   0  0  0  0  0  0  0  0  0  0  0  0
   -0.5090   -0.0050   -1.2160 C   0  0  1  0  0  0  0  0  0  0  0  0
   -0.2520   -0.3430   -2.2690 H   0  0  0  0  0  0  0  0  0  0  0  0
   -1.6240   -0.8660   -0.6600 C   0  0  0  0  0  0  0  0  0  0  0  0
   -1.8280   -2.1380   -1.1800 C   0  0  0  0  0  0  0  0  0  0  0  0
   -2.8110   -2.9780   -0.6500 C   0  0  0  0  0  0  0  0  0  0  0  0
   -3.5940   -2.5460    0.4160 C   0  0  0  0  0  0  0  0  0  0  0  0
   -3.4080   -1.2770    0.9620 C   0  0  0  0  0  0  0  0  0  0  0  0
   -2.4240   -0.4500    0.4220 C   0  0  0  0  0  0  0  0  0  0  0  0
   -2.1500    0.8110    0.8410 O   0  0  0  0  0  0  0  0  0  0  0  0
   -2.8220    1.2850    1.9990 C   0  0  0  0  0  0  0  0  0  0  0  0
   -0.9490    1.4060   -1.3380 N   0  0  0  0  0  0  0  0  0  0  0  0
    1.1780    2.9750    0.5890 H   0  0  0  0  0  0  0  0  0  0  0  0
    2.4740    0.1270    1.9100 H   0  0  0  0  0  0  0  0  0  0  0  0
    2.8060    1.8230    1.5400 H   0  0  0  0  0  0  0  0  0  0  0  0
    2.8520   -3.1330    1.8890 H   0  0  0  0  0  0  0  0  0  0  0  0
    3.3930   -2.8800    0.1810 H   0  0  0  0  0  0  0  0  0  0  0  0
    1.9580   -3.9180    0.5230 H   0  0  0  0  0  0  0  0  0  0  0  0
   -1.1910   -2.4980   -1.9950 H   0  0  0  0  0  0  0  0  0  0  0  0
   -2.9500   -3.9710   -1.0640 H   0  0  0  0  0  0  0  0  0  0  0  0
   -4.3540   -3.2020    0.8320 H   0  0  0  0  0  0  0  0  0  0  0  0
   -4.0160   -0.9520    1.7960 H   0  0  0  0  0  0  0  0  0  0  0  0
   -2.3900    2.2930    2.1090 H   0  0  0  0  0  0  0  0  0  0  0  0
   -2.5860    0.6670    2.8690 H   0  0  0  0  0  0  0  0  0  0  0  0
   -3.8990    1.3540    1.8280 H   0  0  0  0  0  0  0  0  0  0  0  0
   -1.8690    1.5360   -1.7510 H   0  0  0  0  0  0  0  0  0  0  0  0
  1  2  2  0  0  0  0
  2  3  1  0  0  0  0
  2 24  1  0  0  0  0
  3  4  1  0  0  0  0
  3 25  1  0  0  0  0
  4  5  1  0  0  0  0
  4  9  2  0  0  0  0
  5  6  1  0  0  0  0
  5 26  1  0  0  0  0
  5 27  1  0  0  0  0
  6  7  1  0  0  0  0
  6  8  1  0  0  0  0
  9 10  1  0  0  0  0
  9 14  1  0  0  0  0
 10 11  1  0  0  0  0
 10 13  2  0  0  0  0
 11 12  1  0  0  0  0
 12 28  1  0  0  0  0
 12 29  1  0  0  0  0
 12 30  1  0  0  0  0
 14 15  1  6  0  0  0
 14 16  1  0  0  0  0
 14 24  1  0  0  0  0
 16 17  2  0  0  0  0
 16 21  1  0  0  0  0
 17 18  1  0  0  0  0
 17 31  1  0  0  0  0
 18 19  2  0  0  0  0
 18 32  1  0  0  0  0
 19 20  1  0  0  0  0
 19 33  1  0  0  0  0
 20 21  2  0  0  0  0
 20 34  1  0  0  0  0
 21 22  1  0  0  0  0
 22 23  1  0  0  0  0
 23 35  1  0  0  0  0
 23 36  1  0  0  0  0
 23 37  1  0  0  0  0
 24 38  1  0  0  0  0
M  CHG  2   7  -1   8  -1
M  END
$$$$
RDT09
 OpenBabel09302314563D

 42 43  0  0  1  0  0  0  0  0999 V2000
   -0.0170    4.2170    0.5890 S   0  0  0  0  0  0  0  0  0  0  0  0
   -0.4210    2.5530    0.5820 C   0  0  0  0  0  0  0  0  0  0  0  0
   -1.3710    2.0850   -0.2940 N   0  0  0  0  0  0  0  0  0  0  0  0
   -1.7190    0.7130   -0.3890 C   0  0  0  0  0  0  0  0  0  0  0  0
   -2.7710    0.4200   -1.3620 C   0  0  0  0  0  0  0  0  0  0  0  0
   -4.0590   -0.2330   -0.6060 C   0  0  0  0  0  3  0  0  0  0  0  0
   -3.7720   -0.9680    0.3350 O   0  5  0  0  0  0  0  0  0  0  0  0
   -5.1260    0.0880   -1.1100 O   0  5  0  0  0  0  0  0  0  0  0  0
   -1.0880   -0.1730    0.4200 C   0  0  0  0  0  0  0  0  0  0  0  0
   -1.4280   -1.5960    0.4920 C   0  0  0  0  0  0  0  0  0  0  0  0
   -1.6050   -2.1360   -0.7480 O   0  0  0  0  0  0  0  0  0  0  0  0
   -2.2300   -3.4140   -0.7500 C   0  0  0  0  0  0  0  0  0  0  0  0
   -1.3840   -2.2850    1.4870 O   0  0  0  0  0  0  0  0  0  0  0  0
   -0.0520    0.2340    1.4260 C   0  0  1  0  0  0  0  0  0  0  0  0
   -0.4170   -0.0680    2.4590 H   0  0  0  0  0  0  0  0  0  0  0  0
    1.2550   -0.4710    1.1200 C   0  0  0  0  0  0  0  0  0  0  0  0
    1.5750   -1.6230    1.8340 C   0  0  0  0  0  0  0  0  0  0  0  0
    2.7390   -2.3390    1.5580 C   0  0  0  0  0  0  0  0  0  0  0  0
    3.5830   -1.9250    0.5330 C   0  0  0  0  0  0  0  0  0  0  0  0
    3.2590   -0.7880   -0.2030 C   0  0  0  0  0  0  0  0  0  0  0  0
    4.1310   -0.3800   -1.1900 O   0  0  0  0  0  0  0  0  0  0  0  0
    3.8220   -0.9950   -2.4410 C   0  0  0  0  0  0  0  0  0  0  0  0
    2.1100   -0.0410    0.0900 C   0  0  0  0  0  0  0  0  0  0  0  0
    1.6780    1.0580   -0.5740 O   0  0  0  0  0  0  0  0  0  0  0  0
    2.6590    1.8850   -1.1910 C   0  0  0  0  0  0  0  0  0  0  0  0
    0.1410    1.7010    1.4760 N   0  0  0  0  0  0  0  0  0  0  0  0
   -1.8870    2.7570   -0.8630 H   0  0  0  0  0  0  0  0  0  0  0  0
   -2.4860   -0.3520   -2.0940 H   0  0  0  0  0  0  0  0  0  0  0  0
   -3.1410    1.2810   -1.9330 H   0  0  0  0  0  0  0  0  0  0  0  0
   -2.3690   -3.6240   -1.8130 H   0  0  0  0  0  0  0  0  0  0  0  0
   -3.1980   -3.3420   -0.2290 H   0  0  0  0  0  0  0  0  0  0  0  0
   -1.5860   -4.1500   -0.2650 H   0  0  0  0  0  0  0  0  0  0  0  0
    0.8850   -1.9870    2.6030 H   0  0  0  0  0  0  0  0  0  0  0  0
    2.9750   -3.2300    2.1320 H   0  0  0  0  0  0  0  0  0  0  0  0
    4.4860   -2.4780    0.2910 H   0  0  0  0  0  0  0  0  0  0  0  0
    4.5340   -0.5290   -3.1290 H   0  0  0  0  0  0  0  0  0  0  0  0
    2.7880   -0.7790   -2.7340 H   0  0  0  0  0  0  0  0  0  0  0  0
    3.9870   -2.0750   -2.3820 H   0  0  0  0  0  0  0  0  0  0  0  0
    2.1380    2.8520   -1.2520 H   0  0  0  0  0  0  0  0  0  0  0  0
    2.8860    1.5030   -2.1880 H   0  0  0  0  0  0  0  0  0  0  0  0
    3.5660    1.9770   -0.5890 H   0  0  0  0  0  0  0  0  0  0  0  0
    0.9420    2.0160    2.0160 H   0  0  0  0  0  0  0  0  0  0  0  0
  1  2  2  0  0  0  0
  2  3  1  0  0  0  0
  2 26  1  0  0  0  0
  3  4  1  0  0  0  0
  3 27  1  0  0  0  0
  4  5  1  0  0  0  0
  4  9  2  0  0  0  0
  5  6  1  0  0  0  0
  5 28  1  0  0  0  0
  5 29  1  0  0  0  0
  6  7  1  0  0  0  0
  6  8  1  0  0  0  0
  9 10  1  0  0  0  0
  9 14  1  0  0  0  0
 10 11  1  0  0  0  0
 10 13  2  0  0  0  0
 11 12  1  0  0  0  0
 12 30  1  0  0  0  0
 12 31  1  0  0  0  0
 12 32  1  0  0  0  0
 14 15  1  1  0  0  0
 14 16  1  0  0  0  0
 14 26  1  0  0  0  0
 16 17  2  0  0  0  0
 16 23  1  0  0  0  0
 17 18  1  0  0  0  0
 17 33  1  0  0  0  0
 18 19  2  0  0  0  0
 18 34  1  0  0  0  0
 19 20  1  0  0  0  0
 19 35  1  0  0  0  0
 20 21  1  0  0  0  0
 20 23  2  0  0  0  0
 21 22  1  0  0  0  0
 22 36  1  0  0  0  0
 22 37  1  0  0  0  0
 22 38  1  0  0  0  0
 23 24  1  0  0  0  0
 24 25  1  0  0  0  0
 25 39  1  0  0  0  0
 25 40  1  0  0  0  0
 25 41  1  0  0  0  0
 26 42  1  0  0  0  0
M  CHG  2   7  -1   8  -1
M  END
$$$$
RDT10
 OpenBabel09302314563D

 42 43  0  0  1  0  0  0  0  0999 V2000
    1.0030    4.2130   -0.4880 S   0  0  0  0  0  0  0  0  0  0  0  0
    1.0650    2.5030   -0.5270 C   0  0  0  0  0  0  0  0  0  0  0  0
    1.9530    1.8360    0.2830 N   0  0  0  0  0  0  0  0  0  0  0  0
    2.0030    0.4200    0.3680 C   0  0  0  0  0  0  0  0  0  0  0  0
    3.0300   -0.0970    1.2710 C   0  0  0  0  0  0  0  0  0  0  0  0
    4.0870   -1.0180    0.4400 C   0  0  0  0  0  3  0  0  0  0  0  0
    3.5810   -1.6770   -0.4630 O   0  5  0  0  0  0  0  0  0  0  0  0
    5.2330   -0.9340    0.8620 O   0  5  0  0  0  0  0  0  0  0  0  0
    1.1380   -0.3040   -0.3850 C   0  0  0  0  0  0  0  0  0  0  0  0
    1.1450   -1.7670   -0.4550 C   0  0  0  0  0  0  0  0  0  0  0  0
    1.2870   -2.3290    0.7790 O   0  0  0  0  0  0  0  0  0  0  0  0
    1.6040   -3.7160    0.7610 C   0  0  0  0  0  0  0  0  0  0  0  0
    0.8760   -2.4300   -1.4310 O   0  0  0  0  0  0  0  0  0  0  0  0
    0.1500    0.3210   -1.3270 C   0  0  1  0  0  0  0  0  0  0  0  0
    0.3650   -0.0560   -2.3760 H   0  0  0  0  0  0  0  0  0  0  0  0
   -1.2560   -0.0580   -0.9230 C   0  0  0  0  0  0  0  0  0  0  0  0
   -1.8900   -1.1210   -1.5650 C   0  0  0  0  0  0  0  0  0  0  0  0
   -3.1650   -1.5320   -1.1930 C   0  0  0  0  0  0  0  0  0  0  0  0
   -3.8040   -0.8640   -0.1400 C   0  0  0  0  0  0  0  0  0  0  0  0
   -5.0470   -1.3540    0.1230 O   0  0  0  0  0  0  0  0  0  0  0  0
   -5.7480   -0.7910    1.2210 C   0  0  0  0  0  0  0  0  0  0  0  0
   -3.2040    0.1930    0.5440 C   0  0  0  0  0  0  0  0  0  0  0  0
   -1.9230    0.5760    0.1410 C   0  0  0  0  0  0  0  0  0  0  0  0
   -1.2140    1.5840    0.6970 O   0  0  0  0  0  0  0  0  0  0  0  0
   -1.7680    2.2520    1.8220 C   0  0  0  0  0  0  0  0  0  0  0  0
    0.2890    1.7970   -1.3890 N   0  0  0  0  0  0  0  0  0  0  0  0
    2.6420    2.3780    0.8060 H   0  0  0  0  0  0  0  0  0  0  0  0
    2.6350   -0.7870    2.0330 H   0  0  0  0  0  0  0  0  0  0  0  0
    3.6190    0.6630    1.8000 H   0  0  0  0  0  0  0  0  0  0  0  0
    1.7670   -3.9510    1.8150 H   0  0  0  0  0  0  0  0  0  0  0  0
    2.5230   -3.8670    0.1730 H   0  0  0  0  0  0  0  0  0  0  0  0
    0.7760   -4.2870    0.3350 H   0  0  0  0  0  0  0  0  0  0  0  0
   -1.3600   -1.6590   -2.3620 H   0  0  0  0  0  0  0  0  0  0  0  0
   -3.6530   -2.3610   -1.6910 H   0  0  0  0  0  0  0  0  0  0  0  0
   -6.6780   -1.3720    1.2300 H   0  0  0  0  0  0  0  0  0  0  0  0
   -5.9600    0.2680    1.0460 H   0  0  0  0  0  0  0  0  0  0  0  0
   -5.1950   -0.9390    2.1540 H   0  0  0  0  0  0  0  0  0  0  0  0
   -3.7030    0.6920    1.3580 H   0  0  0  0  0  0  0  0  0  0  0  0
   -0.9820    2.9900    2.0500 H   0  0  0  0  0  0  0  0  0  0  0  0
   -1.9010    1.5600    2.6580 H   0  0  0  0  0  0  0  0  0  0  0  0
   -2.6980    2.7600    1.5590 H   0  0  0  0  0  0  0  0  0  0  0  0
   -0.4610    2.2800   -1.8750 H   0  0  0  0  0  0  0  0  0  0  0  0
  1  2  2  0  0  0  0
  2  3  1  0  0  0  0
  2 26  1  0  0  0  0
  3  4  1  0  0  0  0
  3 27  1  0  0  0  0
  4  5  1  0  0  0  0
  4  9  2  0  0  0  0
  5  6  1  0  0  0  0
  5 28  1  0  0  0  0
  5 29  1  0  0  0  0
  6  7  1  0  0  0  0
  6  8  1  0  0  0  0
  9 10  1  0  0  0  0
  9 14  1  0  0  0  0
 10 11  1  0  0  0  0
 10 13  2  0  0  0  0
 11 12  1  0  0  0  0
 12 30  1  0  0  0  0
 12 31  1  0  0  0  0
 12 32  1  0  0  0  0
 14 15  1  6  0  0  0
 14 16  1  0  0  0  0
 14 26  1  0  0  0  0
 16 17  2  0  0  0  0
 16 23  1  0  0  0  0
 17 18  1  0  0  0  0
 17 33  1  0  0  0  0
 18 19  2  0  0  0  0
 18 34  1  0  0  0  0
 19 20  1  0  0  0  0
 19 22  1  0  0  0  0
 20 21  1  0  0  0  0
 21 35  1  0  0  0  0
 21 36  1  0  0  0  0
 21 37  1  0  0  0  0
 22 23  2  0  0  0  0
 22 38  1  0  0  0  0
 23 24  1  0  0  0  0
 24 25  1  0  0  0  0
 25 39  1  0  0  0  0
 25 40  1  0  0  0  0
 25 41  1  0  0  0  0
 26 42  1  0  0  0  0
M  CHG  2   7  -1   8  -1
M  END
$$$$
RDT11
 OpenBabel09302314563D

 42 43  0  0  1  0  0  0  0  0999 V2000
    2.9890    3.5060   -0.6640 S   0  0  0  0  0  0  0  0  0  0  0  0
    2.1370    2.0340   -0.6490 C   0  0  0  0  0  0  0  0  0  0  0  0
    2.8180    0.8550   -0.4190 N   0  0  0  0  0  0  0  0  0  0  0  0
    2.1430   -0.3180    0.0010 C   0  0  0  0  0  0  0  0  0  0  0  0
    3.0070   -1.3420    0.5860 C   0  0  0  0  0  0  0  0  0  0  0  0
    2.8700   -2.7190   -0.2730 C   0  0  0  0  0  3  0  0  0  0  0  0
    1.7070   -3.0310   -0.5140 O   0  5  0  0  0  0  0  0  0  0  0  0
    3.9420   -3.2510   -0.5230 O   0  5  0  0  0  0  0  0  0  0  0  0
    0.7940   -0.3810   -0.1650 C   0  0  0  0  0  0  0  0  0  0  0  0
    0.0180   -1.5550    0.2420 C   0  0  0  0  0  0  0  0  0  0  0  0
    0.3030   -1.8730    1.5430 O   0  0  0  0  0  0  0  0  0  0  0  0
   -0.1860   -3.1420    1.9590 C   0  0  0  0  0  0  0  0  0  0  0  0
   -0.8870   -2.0910   -0.3520 O   0  0  0  0  0  0  0  0  0  0  0  0
    0.0670    0.6880   -0.9320 C   0  0  1  0  0  0  0  0  0  0  0  0
    0.0470    0.3840   -2.0260 H   0  0  0  0  0  0  0  0  0  0  0  0
   -1.3540    0.8680   -0.4470 C   0  0  0  0  0  0  0  0  0  0  0  0
   -2.3320    0.0150   -0.9560 C   0  0  0  0  0  0  0  0  0  0  0  0
   -3.6300    0.0800   -0.4500 C   0  0  0  0  0  0  0  0  0  0  0  0
   -4.6390   -0.7550   -0.8300 O   0  0  0  0  0  0  0  0  0  0  0  0
   -4.2270   -1.9880   -1.4150 C   0  0  0  0  0  0  0  0  0  0  0  0
   -4.0110    1.0450    0.4940 C   0  0  0  0  0  0  0  0  0  0  0  0
   -3.0470    1.9260    0.9660 C   0  0  0  0  0  0  0  0  0  0  0  0
   -1.7350    1.8190    0.5020 C   0  0  0  0  0  0  0  0  0  0  0  0
   -0.8210    2.7600    0.9290 O   0  0  0  0  0  0  0  0  0  0  0  0
   -0.0910    2.3190    2.0750 C   0  0  0  0  0  0  0  0  0  0  0  0
    0.8020    1.9810   -0.8880 N   0  0  0  0  0  0  0  0  0  0  0  0
    3.8380    0.8610   -0.4180 H   0  0  0  0  0  0  0  0  0  0  0  0
    2.7020   -1.6440    1.6010 H   0  0  0  0  0  0  0  0  0  0  0  0
    4.0750   -1.0920    0.6300 H   0  0  0  0  0  0  0  0  0  0  0  0
    0.2400   -3.2640    2.9570 H   0  0  0  0  0  0  0  0  0  0  0  0
    0.1830   -3.9170    1.2690 H   0  0  0  0  0  0  0  0  0  0  0  0
   -1.2780   -3.1340    1.9770 H   0  0  0  0  0  0  0  0  0  0  0  0
   -2.0610   -0.7320   -1.7070 H   0  0  0  0  0  0  0  0  0  0  0  0
   -5.1260   -2.6060   -1.3350 H   0  0  0  0  0  0  0  0  0  0  0  0
   -3.3920   -2.4440   -0.8600 H   0  0  0  0  0  0  0  0  0  0  0  0
   -3.9540   -1.8260   -2.4620 H   0  0  0  0  0  0  0  0  0  0  0  0
   -5.0340    1.0830    0.8490 H   0  0  0  0  0  0  0  0  0  0  0  0
   -3.2980    2.6910    1.6960 H   0  0  0  0  0  0  0  0  0  0  0  0
    0.6800    3.0900    2.1880 H   0  0  0  0  0  0  0  0  0  0  0  0
    0.3620    1.3330    1.8990 H   0  0  0  0  0  0  0  0  0  0  0  0
   -0.7520    2.2900    2.9440 H   0  0  0  0  0  0  0  0  0  0  0  0
    0.2250    2.8100   -0.6650 H   0  0  0  0  0  0  0  0  0  0  0  0
  1  2  2  0  0  0  0
  2  3  1  0  0  0  0
  2 26  1  0  0  0  0
  3  4  1  0  0  0  0
  3 27  1  0  0  0  0
  4  5  1  0  0  0  0
  4  9  2  0  0  0  0
  5  6  1  0  0  0  0
  5 28  1  0  0  0  0
  5 29  1  0  0  0  0
  6  7  1  0  0  0  0
  6  8  1  0  0  0  0
  9 10  1  0  0  0  0
  9 14  1  0  0  0  0
 10 11  1  0  0  0  0
 10 13  2  0  0  0  0
 11 12  1  0  0  0  0
 12 30  1  0  0  0  0
 12 31  1  0  0  0  0
 12 32  1  0  0  0  0
 14 15  1  6  0  0  0
 14 16  1  0  0  0  0
 14 26  1  0  0  0  0
 16 17  2  0  0  0  0
 16 23  1  0  0  0  0
 17 18  1  0  0  0  0
 17 33  1  0  0  0  0
 18 19  1  0  0  0  0
 18 21  2  0  0  0  0
 19 20  1  0  0  0  0
 20 34  1  0  0  0  0
 20 35  1  0  0  0  0
 20 36  1  0  0  0  0
 21 22  1  0  0  0  0
 21 37  1  0  0  0  0
 22 23  2  0  0  0  0
 22 38  1  0  0  0  0
 23 24  1  0  0  0  0
 24 25  1  0  0  0  0
 25 39  1  0  0  0  0
 25 40  1  0  0  0  0
 25 41  1  0  0  0  0
 26 42  1  0  0  0  0
M  CHG  2   7  -1   8  -1
M  END
$$$$
RDT12
 OpenBabel09302314563D

 38 39  0  0  1  0  0  0  0  0999 V2000
   -1.6100    3.8310    0.5880 S   0  0  0  0  0  0  0  0  0  0  0  0
   -1.3060    2.1650    0.6570 C   0  0  0  0  0  0  0  0  0  0  0  0
   -2.0310    1.2670   -0.0980 N   0  0  0  0  0  0  0  0  0  0  0  0
   -1.8330   -0.1080   -0.0320 C   0  0  0  0  0  0  0  0  0  0  0  0
   -2.7420   -0.9770   -0.8070 C   0  0  0  0  0  0  0  0  0  0  0  0
   -4.1320   -0.3950   -1.3050 C   0  0  0  0  0  3  0  0  0  0  0  0
   -4.1710    0.8300   -1.5020 O   0  5  0  0  0  0  0  0  0  0  0  0
   -4.9980   -1.2430   -1.4760 O   0  5  0  0  0  0  0  0  0  0  0  0
   -0.7980   -0.5990    0.7280 C   0  0  0  0  0  0  0  0  0  0  0  0
   -0.4720   -1.9950    0.9170 C   0  0  0  0  0  0  0  0  0  0  0  0
   -0.9920   -2.7940   -0.0600 O   0  0  0  0  0  0  0  0  0  0  0  0
   -0.7060   -4.1810    0.0640 C   0  0  0  0  0  0  0  0  0  0  0  0
    0.2050   -2.4710    1.8050 O   0  0  0  0  0  0  0  0  0  0  0  0
    0.1550    0.3070    1.4550 C   0  0  1  0  0  0  0  0  0  0  0  0
    0.2480   -0.0310    2.5300 H   0  0  0  0  0  0  0  0  0  0  0  0
    1.5140    0.2540    0.7800 C   0  0  0  0  0  0  0  0  0  0  0  0
    2.5240   -0.5260    1.3540 C   0  0  0  0  0  0  0  0  0  0  0  0
    3.7700   -0.6190    0.7500 C   0  0  0  0  0  0  0  0  0  0  0  0
    3.9890    0.0790   -0.4470 C   0  0  0  0  0  0  0  0  0  0  0  0
    5.2550   -0.0830   -0.9310 O   0  0  0  0  0  0  0  0  0  0  0  0
    5.5530    0.5360   -2.1720 C   0  0  0  0  0  0  0  0  0  0  0  0
    2.9910    0.8470   -1.0430 C   0  0  0  0  0  0  0  0  0  0  0  0
    1.7470    0.9220   -0.4200 C   0  0  0  0  0  0  0  0  0  0  0  0
   -0.3350    1.6990    1.4900 N   0  0  0  0  0  0  0  0  0  0  0  0
   -2.8590    1.6250   -0.6870 H   0  0  0  0  0  0  0  0  0  0  0  0
   -2.9880   -1.9000   -0.2380 H   0  0  0  0  0  0  0  0  0  0  0  0
   -2.2410   -1.3330   -1.7310 H   0  0  0  0  0  0  0  0  0  0  0  0
   -1.2270   -4.6140   -0.7970 H   0  0  0  0  0  0  0  0  0  0  0  0
   -1.1000   -4.5680    1.0080 H   0  0  0  0  0  0  0  0  0  0  0  0
    0.3740   -4.3500    0.0090 H   0  0  0  0  0  0  0  0  0  0  0  0
    2.3210   -1.0880    2.2700 H   0  0  0  0  0  0  0  0  0  0  0  0
    4.5610   -1.2230    1.1810 H   0  0  0  0  0  0  0  0  0  0  0  0
    6.5950    0.2370   -2.3410 H   0  0  0  0  0  0  0  0  0  0  0  0
    5.4760    1.6250   -2.0930 H   0  0  0  0  0  0  0  0  0  0  0  0
    4.9090    0.1470   -2.9680 H   0  0  0  0  0  0  0  0  0  0  0  0
    3.1610    1.3740   -1.9730 H   0  0  0  0  0  0  0  0  0  0  0  0
    0.9490    1.5060   -0.8860 H   0  0  0  0  0  0  0  0  0  0  0  0
    0.2400    2.3570    2.0060 H   0  0  0  0  0  0  0  0  0  0  0  0
  1  2  2  0  0  0  0
  2  3  1  0  0  0  0
  2 24  1  0  0  0  0
  3  4  1  0  0  0  0
  3 25  1  0  0  0  0
  4  5  1  0  0  0  0
  4  9  2  0  0  0  0
  5  6  1  0  0  0  0
  5 26  1  0  0  0  0
  5 27  1  0  0  0  0
  6  7  1  0  0  0  0
  6  8  1  0  0  0  0
  9 10  1  0  0  0  0
  9 14  1  0  0  0  0
 10 11  1  0  0  0  0
 10 13  2  0  0  0  0
 11 12  1  0  0  0  0
 12 28  1  0  0  0  0
 12 29  1  0  0  0  0
 12 30  1  0  0  0  0
 14 15  1  1  0  0  0
 14 16  1  0  0  0  0
 14 24  1  0  0  0  0
 16 17  2  0  0  0  0
 16 23  1  0  0  0  0
 17 18  1  0  0  0  0
 17 31  1  0  0  0  0
 18 19  2  0  0  0  0
 18 32  1  0  0  0  0
 19 20  1  0  0  0  0
 19 22  1  0  0  0  0
 20 21  1  0  0  0  0
 21 33  1  0  0  0  0
 21 34  1  0  0  0  0
 21 35  1  0  0  0  0
 22 23  2  0  0  0  0
 22 36  1  0  0  0  0
 23 37  1  0  0  0  0
 24 38  1  0  0  0  0
M  CHG  2   7  -1   8  -1
M  END
$$$$
RDT13
 OpenBabel09302314563D

 46 47  0  0  1  0  0  0  0  0999 V2000
   -1.5290    4.2710    0.4770 S   0  0  0  0  0  0  0  0  0  0  0  0
   -1.3980    2.5670    0.4970 C   0  0  0  0  0  0  0  0  0  0  0  0
   -2.2760    1.8080   -0.2440 N   0  0  0  0  0  0  0  0  0  0  0  0
   -2.1770    0.3970   -0.3430 C   0  0  0  0  0  0  0  0  0  0  0  0
   -3.2050   -0.2260   -1.1780 C   0  0  0  0  0  0  0  0  0  0  0  0
   -4.0630   -1.3000   -0.3110 C   0  0  0  0  0  3  0  0  0  0  0  0
   -3.4070   -1.9120    0.5280 O   0  5  0  0  0  0  0  0  0  0  0  0
   -5.2390   -1.3640   -0.6460 O   0  5  0  0  0  0  0  0  0  0  0  0
   -1.1800   -0.2340    0.3270 C   0  0  0  0  0  0  0  0  0  0  0  0
   -1.0280   -1.6900    0.3530 C   0  0  0  0  0  0  0  0  0  0  0  0
   -1.1470   -2.2200   -0.9020 O   0  0  0  0  0  0  0  0  0  0  0  0
   -1.3040   -3.6340   -0.9310 C   0  0  0  0  0  0  0  0  0  0  0  0
   -0.6570   -2.3620    1.2880 O   0  0  0  0  0  0  0  0  0  0  0  0
   -0.1760    0.4920    1.1750 C   0  0  1  0  0  0  0  0  0  0  0  0
   -0.2410    0.0890    2.2330 H   0  0  0  0  0  0  0  0  0  0  0  0
    1.2160    0.3150    0.6240 C   0  0  0  0  0  0  0  0  0  0  0  0
    2.2820   -0.0830    1.4310 C   0  0  0  0  0  0  0  0  0  0  0  0
    2.0890   -0.1120    2.7890 O   0  0  0  0  0  0  0  0  0  0  0  0
    1.9760   -1.4380    3.3050 C   0  0  0  0  0  0  0  0  0  0  0  0
    3.5550   -0.3490    0.9270 C   0  0  0  0  0  0  0  0  0  0  0  0
    3.7560   -0.1860   -0.4470 C   0  0  0  0  0  0  0  0  0  0  0  0
    5.0260   -0.4770   -0.8340 O   0  0  0  0  0  0  0  0  0  0  0  0
    5.3250   -0.3660   -2.2180 C   0  0  0  0  0  0  0  0  0  0  0  0
    2.7410    0.2420   -1.3030 C   0  0  0  0  0  0  0  0  0  0  0  0
    1.4820    0.4950   -0.7490 C   0  0  0  0  0  0  0  0  0  0  0  0
    0.4160    0.9480   -1.4400 O   0  0  0  0  0  0  0  0  0  0  0  0
    0.5230    1.0210   -2.8560 C   0  0  0  0  0  0  0  0  0  0  0  0
   -0.4660    1.9470    1.2580 N   0  0  0  0  0  0  0  0  0  0  0  0
   -3.0610    2.2740   -0.6990 H   0  0  0  0  0  0  0  0  0  0  0  0
   -2.7860   -0.8360   -1.9940 H   0  0  0  0  0  0  0  0  0  0  0  0
   -3.9280    0.4660   -1.6300 H   0  0  0  0  0  0  0  0  0  0  0  0
   -1.4930   -3.8460   -1.9850 H   0  0  0  0  0  0  0  0  0  0  0  0
   -2.1680   -3.9140   -0.3080 H   0  0  0  0  0  0  0  0  0  0  0  0
   -0.3960   -4.1200   -0.5690 H   0  0  0  0  0  0  0  0  0  0  0  0
    1.8190   -1.2650    4.3740 H   0  0  0  0  0  0  0  0  0  0  0  0
    2.8910   -2.0050    3.1250 H   0  0  0  0  0  0  0  0  0  0  0  0
    1.1050   -1.9440    2.8620 H   0  0  0  0  0  0  0  0  0  0  0  0
    4.3600   -0.6600    1.5790 H   0  0  0  0  0  0  0  0  0  0  0  0
    6.3790   -0.6660   -2.2560 H   0  0  0  0  0  0  0  0  0  0  0  0
    5.2080    0.6670   -2.5590 H   0  0  0  0  0  0  0  0  0  0  0  0
    4.7090   -1.0550   -2.8050 H   0  0  0  0  0  0  0  0  0  0  0  0
    2.9150    0.3730   -2.3590 H   0  0  0  0  0  0  0  0  0  0  0  0
   -0.4870    1.3570   -3.1350 H   0  0  0  0  0  0  0  0  0  0  0  0
    0.7280    0.0360   -3.2830 H   0  0  0  0  0  0  0  0  0  0  0  0
    1.2700    1.7600   -3.1550 H   0  0  0  0  0  0  0  0  0  0  0  0
    0.2330    2.5010    1.7460 H   0  0  0  0  0  0  0  0  0  0  0  0
  1  2  2  0  0  0  0
  2  3  1  0  0  0  0
  2 28  1  0  0  0  0
  3  4  1  0  0  0  0
  3 29  1  0  0  0  0
  4  5  1  0  0  0  0
  4  9  2  0  0  0  0
  5  6  1  0  0  0  0
  5 30  1  0  0  0  0
  5 31  1  0  0  0  0
  6  7  1  0  0  0  0
  6  8  1  0  0  0  0
  9 10  1  0  0  0  0
  9 14  1  0  0  0  0
 10 11  1  0  0  0  0
 10 13  2  0  0  0  0
 11 12  1  0  0  0  0
 12 32  1  0  0  0  0
 12 33  1  0  0  0  0
 12 34  1  0  0  0  0
 14 15  1  1  0  0  0
 14 16  1  0  0  0  0
 14 28  1  0  0  0  0
 16 17  2  0  0  0  0
 16 25  1  0  0  0  0
 17 18  1  0  0  0  0
 17 20  1  0  0  0  0
 18 19  1  0  0  0  0
 19 35  1  0  0  0  0
 19 36  1  0  0  0  0
 19 37  1  0  0  0  0
 20 21  2  0  0  0  0
 20 38  1  0  0  0  0
 21 22  1  0  0  0  0
 21 24  1  0  0  0  0
 22 23  1  0  0  0  0
 23 39  1  0  0  0  0
 23 40  1  0  0  0  0
 23 41  1  0  0  0  0
 24 25  2  0  0  0  0
 24 42  1  0  0  0  0
 25 26  1  0  0  0  0
 26 27  1  0  0  0  0
 27 43  1  0  0  0  0
 27 44  1  0  0  0  0
 27 45  1  0  0  0  0
 28 46  1  0  0  0  0
M  CHG  2   7  -1   8  -1
M  END
$$$$
RDT14
 OpenBabel09302314563D

 46 47  0  0  1  0  0  0  0  0999 V2000
    1.4590    4.3240    0.9670 S   0  0  0  0  0  0  0  0  0  0  0  0
    1.4980    2.7200    0.3930 C   0  0  0  0  0  0  0  0  0  0  0  0
    2.3850    1.8150    0.9350 N   0  0  0  0  0  0  0  0  0  0  0  0
    2.4910    0.4790    0.4740 C   0  0  0  0  0  0  0  0  0  0  0  0
    3.5530   -0.3010    1.1040 C   0  0  0  0  0  0  0  0  0  0  0  0
    4.6220   -0.7960   -0.0280 C   0  0  0  0  0  3  0  0  0  0  0  0
    4.1010   -1.1370   -1.0850 O   0  5  0  0  0  0  0  0  0  0  0  0
    5.7800   -0.7810    0.3640 O   0  5  0  0  0  0  0  0  0  0  0  0
    1.6270    0.0530   -0.4820 C   0  0  0  0  0  0  0  0  0  0  0  0
    1.7200   -1.2660   -1.1180 C   0  0  0  0  0  0  0  0  0  0  0  0
    1.8050   -2.2500   -0.1660 O   0  0  0  0  0  0  0  0  0  0  0  0
    2.1800   -3.5250   -0.6700 C   0  0  0  0  0  0  0  0  0  0  0  0
    1.5450   -1.5220   -2.2830 O   0  0  0  0  0  0  0  0  0  0  0  0
    0.5410    0.9140   -1.0460 C   0  0  1  0  0  0  0  0  0  0  0  0
    0.6160    0.9030   -2.1790 H   0  0  0  0  0  0  0  0  0  0  0  0
   -0.8460    0.4280   -0.6350 C   0  0  0  0  0  0  0  0  0  0  0  0
   -1.9610    0.9400   -1.2870 C   0  0  0  0  0  0  0  0  0  0  0  0
   -3.2450    0.5120   -0.9030 C   0  0  0  0  0  0  0  0  0  0  0  0
   -4.2210    1.1370   -1.6100 O   0  0  0  0  0  0  0  0  0  0  0  0
   -5.5480    0.6390   -1.5270 C   0  0  0  0  0  0  0  0  0  0  0  0
   -3.4060   -0.4380    0.1080 C   0  0  0  0  0  0  0  0  0  0  0  0
   -4.6530   -0.9240    0.4150 O   0  0  0  0  0  0  0  0  0  0  0  0
   -5.0770   -0.5480    1.7250 C   0  0  0  0  0  0  0  0  0  0  0  0
   -2.2550   -0.9680    0.7260 C   0  0  0  0  0  0  0  0  0  0  0  0
   -2.5110   -1.9080    1.6730 O   0  0  0  0  0  0  0  0  0  0  0  0
   -1.3720   -2.5480    2.2430 C   0  0  0  0  0  0  0  0  0  0  0  0
   -0.9860   -0.5210    0.3760 C   0  0  0  0  0  0  0  0  0  0  0  0
    0.6720    2.3220   -0.6040 N   0  0  0  0  0  0  0  0  0  0  0  0
    3.0780    2.1530    1.6040 H   0  0  0  0  0  0  0  0  0  0  0  0
    3.2000   -1.2490    1.5400 H   0  0  0  0  0  0  0  0  0  0  0  0
    4.1300    0.2190    1.8780 H   0  0  0  0  0  0  0  0  0  0  0  0
    2.3070   -4.1300    0.2300 H   0  0  0  0  0  0  0  0  0  0  0  0
    3.1280   -3.4330   -1.2230 H   0  0  0  0  0  0  0  0  0  0  0  0
    1.3950   -3.9150   -1.3230 H   0  0  0  0  0  0  0  0  0  0  0  0
   -1.8640    1.6560   -2.0980 H   0  0  0  0  0  0  0  0  0  0  0  0
   -6.0570    1.2130   -2.3110 H   0  0  0  0  0  0  0  0  0  0  0  0
   -5.9790    0.8580   -0.5460 H   0  0  0  0  0  0  0  0  0  0  0  0
   -5.5870   -0.4330   -1.7490 H   0  0  0  0  0  0  0  0  0  0  0  0
   -6.1070   -0.9120    1.7610 H   0  0  0  0  0  0  0  0  0  0  0  0
   -5.0340    0.5360    1.8560 H   0  0  0  0  0  0  0  0  0  0  0  0
   -4.4650   -1.0520    2.4820 H   0  0  0  0  0  0  0  0  0  0  0  0
   -1.8300   -3.3240    2.8670 H   0  0  0  0  0  0  0  0  0  0  0  0
   -0.8000   -1.8420    2.8530 H   0  0  0  0  0  0  0  0  0  0  0  0
   -0.7410   -3.0000    1.4660 H   0  0  0  0  0  0  0  0  0  0  0  0
   -0.0980   -0.9180    0.8720 H   0  0  0  0  0  0  0  0  0  0  0  0
   -0.0330    2.9660   -0.9550 H   0  0  0  0  0  0  0  0  0  0  0  0
  1  2  2  0  0  0  0
  2  3  1  0  0  0  0
  2 28  1  0  0  0  0
  3  4  1  0  0  0  0
  3 29  1  0  0  0  0
  4  5  1  0  0  0  0
  4  9  2  0  0  0  0
  5  6  1  0  0  0  0
  5 30  1  0  0  0  0
  5 31  1  0  0  0  0
  6  7  1  0  0  0  0
  6  8  1  0  0  0  0
  9 10  1  0  0  0  0
  9 14  1  0  0  0  0
 10 11  1  0  0  0  0
 10 13  2  0  0  0  0
 11 12  1  0  0  0  0
 12 32  1  0  0  0  0
 12 33  1  0  0  0  0
 12 34  1  0  0  0  0
 14 15  1  6  0  0  0
 14 16  1  0  0  0  0
 14 28  1  0  0  0  0
 16 17  2  0  0  0  0
 16 27  1  0  0  0  0
 17 18  1  0  0  0  0
 17 35  1  0  0  0  0
 18 19  1  0  0  0  0
 18 21  2  0  0  0  0
 19 20  1  0  0  0  0
 20 36  1  0  0  0  0
 20 37  1  0  0  0  0
 20 38  1  0  0  0  0
 21 22  1  0  0  0  0
 21 24  1  0  0  0  0
 22 23  1  0  0  0  0
 23 39  1  0  0  0  0
 23 40  1  0  0  0  0
 23 41  1  0  0  0  0
 24 25  1  0  0  0  0
 24 27  2  0  0  0  0
 25 26  1  0  0  0  0
 26 42  1  0  0  0  0
 26 43  1  0  0  0  0
 26 44  1  0  0  0  0
 27 45  1  0  0  0  0
 28 46  1  0  0  0  0
M  CHG  2   7  -1   8  -1
M  END
$$$$
RDT15
 OpenBabel09302314563D

 34 35  0  0  1  0  0  0  0  0999 V2000
   -1.7510    3.8130    0.5010 S   0  0  0  0  0  0  0  0  0  0  0  0
   -1.3760    2.1660    0.5930 C   0  0  0  0  0  0  0  0  0  0  0  0
   -2.0830    1.2200   -0.1210 N   0  0  0  0  0  0  0  0  0  0  0  0
   -1.8330   -0.1430   -0.0220 C   0  0  0  0  0  0  0  0  0  0  0  0
   -2.7350   -1.0660   -0.7420 C   0  0  0  0  0  0  0  0  0  0  0  0
   -4.1630   -0.5470   -1.2050 C   0  0  0  0  0  3  0  0  0  0  0  0
   -4.2470    0.6680   -1.4440 O   0  5  0  0  0  0  0  0  0  0  0  0
   -5.0060   -1.4280   -1.3090 O   0  5  0  0  0  0  0  0  0  0  0  0
   -0.7580   -0.5750    0.7190 C   0  0  0  0  0  0  0  0  0  0  0  0
   -0.3770   -1.9530    0.9370 C   0  0  0  0  0  0  0  0  0  0  0  0
   -0.9130   -2.8020    0.0140 O   0  0  0  0  0  0  0  0  0  0  0  0
   -0.5750   -4.1730    0.1710 C   0  0  0  0  0  0  0  0  0  0  0  0
    0.3610   -2.3730    1.8050 O   0  0  0  0  0  0  0  0  0  0  0  0
    0.1770    0.3860    1.3940 C   0  0  1  0  0  0  0  0  0  0  0  0
    0.3160    0.0800    2.4750 H   0  0  0  0  0  0  0  0  0  0  0  0
    1.5200    0.3580    0.6760 C   0  0  0  0  0  0  0  0  0  0  0  0
    2.5620   -0.3840    1.2340 C   0  0  0  0  0  0  0  0  0  0  0  0
    3.7950   -0.4570    0.5890 C   0  0  0  0  0  0  0  0  0  0  0  0
    3.9450    0.2250   -0.6110 C   0  0  0  0  0  0  0  0  0  0  0  0
    5.4670    0.1480   -1.4100 Cl  0  0  0  0  0  0  0  0  0  0  0  0
    2.9250    0.9590   -1.1970 C   0  0  0  0  0  0  0  0  0  0  0  0
    1.6960    1.0180   -0.5410 C   0  0  0  0  0  0  0  0  0  0  0  0
   -0.3600    1.7580    1.4050 N   0  0  0  0  0  0  0  0  0  0  0  0
   -2.9390    1.5320   -0.6980 H   0  0  0  0  0  0  0  0  0  0  0  0
   -2.9290   -1.9810   -0.1410 H   0  0  0  0  0  0  0  0  0  0  0  0
   -2.2540   -1.4300   -1.6730 H   0  0  0  0  0  0  0  0  0  0  0  0
   -1.1240   -4.6540   -0.6470 H   0  0  0  0  0  0  0  0  0  0  0  0
   -0.9080   -4.5390    1.1470 H   0  0  0  0  0  0  0  0  0  0  0  0
    0.5050   -4.3100    0.0660 H   0  0  0  0  0  0  0  0  0  0  0  0
    2.4040   -0.9340    2.1660 H   0  0  0  0  0  0  0  0  0  0  0  0
    4.6070   -1.0390    1.0170 H   0  0  0  0  0  0  0  0  0  0  0  0
    3.0680    1.4730   -2.1460 H   0  0  0  0  0  0  0  0  0  0  0  0
    0.8700    1.5750   -0.9890 H   0  0  0  0  0  0  0  0  0  0  0  0
    0.1890    2.4490    1.9060 H   0  0  0  0  0  0  0  0  0  0  0  0
  1  2  2  0  0  0  0
  2  3  1  0  0  0  0
  2 23  1  0  0  0  0
  3  4  1  0  0  0  0
  3 24  1  0  0  0  0
  4  5  1  0  0  0  0
  4  9  2  0  0  0  0
  5  6  1  0  0  0  0
  5 25  1  0  0  0  0
  5 26  1  0  0  0  0
  6  7  1  0  0  0  0
  6  8  1  0  0  0  0
  9 10  1  0  0  0  0
  9 14  1  0  0  0  0
 10 11  1  0  0  0  0
 10 13  2  0  0  0  0
 11 12  1  0  0  0  0
 12 27  1  0  0  0  0
 12 28  1  0  0  0  0
 12 29  1  0  0  0  0
 14 15  1  1  0  0  0
 14 16  1  0  0  0  0
 14 23  1  0  0  0  0
 16 17  2  0  0  0  0
 16 22  1  0  0  0  0
 17 18  1  0  0  0  0
 17 30  1  0  0  0  0
 18 19  2  0  0  0  0
 18 31  1  0  0  0  0
 19 20  1  0  0  0  0
 19 21  1  0  0  0  0
 21 22  2  0  0  0  0
 21 32  1  0  0  0  0
 22 33  1  0  0  0  0
 23 34  1  0  0  0  0
M  CHG  2   7  -1   8  -1
M  END
$$$$
RDT16
 OpenBabel09302314563D

 34 35  0  0  1  0  0  0  0  0999 V2000
   -2.3200    3.3360   -1.5120 S   0  0  0  0  0  0  0  0  0  0  0  0
   -1.6250    1.8270   -1.1870 C   0  0  0  0  0  0  0  0  0  0  0  0
   -2.3640    0.7890   -0.6520 N   0  0  0  0  0  0  0  0  0  0  0  0
   -1.8410   -0.4850   -0.4510 C   0  0  0  0  0  0  0  0  0  0  0  0
   -2.7460   -1.4530    0.1870 C   0  0  0  0  0  0  0  0  0  0  0  0
   -3.5350   -0.8560    1.4510 C   0  0  0  0  0  3  0  0  0  0  0  0
   -3.6260   -1.6140    2.4030 O   0  5  0  0  0  0  0  0  0  0  0  0
   -3.9850    0.2860    1.2740 O   0  5  0  0  0  0  0  0  0  0  0  0
   -0.5610   -0.7600   -0.8770 C   0  0  0  0  0  0  0  0  0  0  0  0
    0.0470   -2.0620   -0.9930 C   0  0  0  0  0  0  0  0  0  0  0  0
   -0.8340   -3.0880   -0.8080 O   0  0  0  0  0  0  0  0  0  0  0  0
   -0.2690   -4.3920   -0.8460 C   0  0  0  0  0  0  0  0  0  0  0  0
    1.2060   -2.2910   -1.2750 O   0  0  0  0  0  0  0  0  0  0  0  0
    0.3790    0.3380   -1.2790 C   0  0  2  0  0  0  0  0  0  0  0  0
    0.8770    0.0560   -2.2570 H   0  0  0  0  0  0  0  0  0  0  0  0
    1.4510    0.5160   -0.2130 C   0  0  0  0  0  0  0  0  0  0  0  0
    2.7750    0.2330   -0.5660 C   0  0  0  0  0  0  0  0  0  0  0  0
    3.7650    0.3700    0.3950 C   0  0  0  0  0  0  0  0  0  0  0  0
    5.3900    0.0350   -0.0520 Cl  0  0  0  0  0  0  0  0  0  0  0  0
    3.5080    0.7610    1.7020 C   0  0  0  0  0  0  0  0  0  0  0  0
    2.1870    1.0180    2.0600 C   0  0  0  0  0  0  0  0  0  0  0  0
    1.1830    0.8880    1.1020 C   0  0  0  0  0  0  0  0  0  0  0  0
   -0.4100    1.1770    1.6120 Cl  0  0  0  0  0  0  0  0  0  0  0  0
   -0.3210    1.6130   -1.5130 N   0  0  0  0  0  0  0  0  0  0  0  0
   -3.2960    1.0170   -0.1590 H   0  0  0  0  0  0  0  0  0  0  0  0
   -2.2190   -2.3560    0.5540 H   0  0  0  0  0  0  0  0  0  0  0  0
   -3.5340   -1.8110   -0.4960 H   0  0  0  0  0  0  0  0  0  0  0  0
   -1.1280   -5.0360   -0.6320 H   0  0  0  0  0  0  0  0  0  0  0  0
    0.5070   -4.4900   -0.0790 H   0  0  0  0  0  0  0  0  0  0  0  0
    0.1510   -4.5940   -1.8350 H   0  0  0  0  0  0  0  0  0  0  0  0
    3.0100   -0.1270   -1.5700 H   0  0  0  0  0  0  0  0  0  0  0  0
    4.3070    0.8550    2.4330 H   0  0  0  0  0  0  0  0  0  0  0  0
    1.9450    1.3090    3.0830 H   0  0  0  0  0  0  0  0  0  0  0  0
    0.2370    2.3730   -1.8880 H   0  0  0  0  0  0  0  0  0  0  0  0
  1  2  2  0  0  0  0
  2  3  1  0  0  0  0
  2 24  1  0  0  0  0
  3  4  1  0  0  0  0
  3 25  1  0  0  0  0
  4  5  1  0  0  0  0
  4  9  2  0  0  0  0
  5  6  1  0  0  0  0
  5 26  1  0  0  0  0
  5 27  1  0  0  0  0
  6  7  1  0  0  0  0
  6  8  1  0  0  0  0
  9 10  1  0  0  0  0
  9 14  1  0  0  0  0
 10 11  1  0  0  0  0
 10 13  2  0  0  0  0
 11 12  1  0  0  0  0
 12 28  1  0  0  0  0
 12 29  1  0  0  0  0
 12 30  1  0  0  0  0
 14 15  1  6  0  0  0
 14 16  1  0  0  0  0
 14 24  1  0  0  0  0
 16 17  2  0  0  0  0
 16 22  1  0  0  0  0
 17 18  1  0  0  0  0
 17 31  1  0  0  0  0
 18 19  1  0  0  0  0
 18 20  2  0  0  0  0
 20 21  1  0  0  0  0
 20 32  1  0  0  0  0
 21 22  2  0  0  0  0
 21 33  1  0  0  0  0
 22 23  1  0  0  0  0
 24 34  1  0  0  0  0
M  CHG  2   7  -1   8  -1
M  END
$$$$
RDT17
 OpenBabel09302314563D

 34 35  0  0  1  0  0  0  0  0999 V2000
   -1.4660    3.8090    0.5110 S   0  0  0  0  0  0  0  0  0  0  0  0
   -1.0730    2.1640    0.5850 C   0  0  0  0  0  0  0  0  0  0  0  0
   -1.8270    1.2080   -0.0650 N   0  0  0  0  0  0  0  0  0  0  0  0
   -1.5570   -0.1520    0.0200 C   0  0  0  0  0  0  0  0  0  0  0  0
   -2.5030   -1.0860   -0.6250 C   0  0  0  0  0  0  0  0  0  0  0  0
   -3.9670   -0.5820   -0.9790 C   0  0  0  0  0  3  0  0  0  0  0  0
   -4.0830    0.6310   -1.2130 O   0  5  0  0  0  0  0  0  0  0  0  0
   -4.8070   -1.4720   -1.0180 O   0  5  0  0  0  0  0  0  0  0  0  0
   -0.4240   -0.5710    0.6760 C   0  0  0  0  0  0  0  0  0  0  0  0
   -0.0140   -1.9440    0.8680 C   0  0  0  0  0  0  0  0  0  0  0  0
   -0.6120   -2.8020   -0.0070 O   0  0  0  0  0  0  0  0  0  0  0  0
   -0.2530   -4.1700    0.1300 C   0  0  0  0  0  0  0  0  0  0  0  0
    0.7920   -2.3540    1.6790 O   0  0  0  0  0  0  0  0  0  0  0  0
    0.5530    0.4010    1.2730 C   0  0  1  0  0  0  0  0  0  0  0  0
    0.7730    0.1020    2.3420 H   0  0  0  0  0  0  0  0  0  0  0  0
    1.8380    0.3820    0.4590 C   0  0  0  0  0  0  0  0  0  0  0  0
    2.9290   -0.3400    0.9460 C   0  0  0  0  0  0  0  0  0  0  0  0
    4.1140   -0.4050    0.2170 C   0  0  0  0  0  0  0  0  0  0  0  0
    4.1660    0.2680   -1.0020 C   0  0  0  0  0  0  0  0  0  0  0  0
    5.2930    0.2200   -1.7020 F   0  0  0  0  0  0  0  0  0  0  0  0
    3.0900    0.9840   -1.5220 C   0  0  0  0  0  0  0  0  0  0  0  0
    1.9150    1.0290   -0.7750 C   0  0  0  0  0  0  0  0  0  0  0  0
    0.0060    1.7690    1.3180 N   0  0  0  0  0  0  0  0  0  0  0  0
   -2.7290    1.5110   -0.5730 H   0  0  0  0  0  0  0  0  0  0  0  0
   -2.6420   -2.0000   -0.0060 H   0  0  0  0  0  0  0  0  0  0  0  0
   -2.0930   -1.4500   -1.5880 H   0  0  0  0  0  0  0  0  0  0  0  0
   -0.8590   -4.6590   -0.6410 H   0  0  0  0  0  0  0  0  0  0  0  0
   -0.5080   -4.5330    1.1300 H   0  0  0  0  0  0  0  0  0  0  0  0
    0.8170   -4.3000   -0.0560 H   0  0  0  0  0  0  0  0  0  0  0  0
    2.8460   -0.8820    1.8920 H   0  0  0  0  0  0  0  0  0  0  0  0
    4.9630   -0.9700    0.5880 H   0  0  0  0  0  0  0  0  0  0  0  0
    3.1570    1.4880   -2.4820 H   0  0  0  0  0  0  0  0  0  0  0  0
    1.0480    1.5690   -1.1650 H   0  0  0  0  0  0  0  0  0  0  0  0
    0.5900    2.4680    1.7660 H   0  0  0  0  0  0  0  0  0  0  0  0
  1  2  2  0  0  0  0
  2  3  1  0  0  0  0
  2 23  1  0  0  0  0
  3  4  1  0  0  0  0
  3 24  1  0  0  0  0
  4  5  1  0  0  0  0
  4  9  2  0  0  0  0
  5  6  1  0  0  0  0
  5 25  1  0  0  0  0
  5 26  1  0  0  0  0
  6  7  1  0  0  0  0
  6  8  1  0  0  0  0
  9 10  1  0  0  0  0
  9 14  1  0  0  0  0
 10 11  1  0  0  0  0
 10 13  2  0  0  0  0
 11 12  1  0  0  0  0
 12 27  1  0  0  0  0
 12 28  1  0  0  0  0
 12 29  1  0  0  0  0
 14 15  1  1  0  0  0
 14 16  1  0  0  0  0
 14 23  1  0  0  0  0
 16 17  2  0  0  0  0
 16 22  1  0  0  0  0
 17 18  1  0  0  0  0
 17 30  1  0  0  0  0
 18 19  2  0  0  0  0
 18 31  1  0  0  0  0
 19 20  1  0  0  0  0
 19 21  1  0  0  0  0
 21 22  2  0  0  0  0
 21 32  1  0  0  0  0
 22 33  1  0  0  0  0
 23 34  1  0  0  0  0
M  CHG  2   7  -1   8  -1
M  END
$$$$
RDT18
 OpenBabel09302314563D

 37 38  0  0  1  0  0  0  0  0999 V2000
   -2.2770    3.8130    0.5120 S   0  0  0  0  0  0  0  0  0  0  0  0
   -1.9140    2.1660    0.6120 C   0  0  0  0  0  0  0  0  0  0  0  0
   -2.5570    1.2300   -0.1740 N   0  0  0  0  0  0  0  0  0  0  0  0
   -2.3280   -0.1350   -0.0630 C   0  0  0  0  0  0  0  0  0  0  0  0
   -3.1720   -1.0470   -0.8610 C   0  0  0  0  0  0  0  0  0  0  0  0
   -4.5430   -0.5090   -1.4590 C   0  0  0  0  0  3  0  0  0  0  0  0
   -4.5860    0.7060   -1.7070 O   0  5  0  0  0  0  0  0  0  0  0  0
   -5.3840   -1.3780   -1.6410 O   0  5  0  0  0  0  0  0  0  0  0  0
   -1.3210   -0.5800    0.7640 C   0  0  0  0  0  0  0  0  0  0  0  0
   -0.9760   -1.9620    1.0100 C   0  0  0  0  0  0  0  0  0  0  0  0
   -1.4520   -2.8060    0.0520 O   0  0  0  0  0  0  0  0  0  0  0  0
   -1.1440   -4.1820    0.2340 C   0  0  0  0  0  0  0  0  0  0  0  0
   -0.3090   -2.3890    1.9310 O   0  0  0  0  0  0  0  0  0  0  0  0
   -0.4370    0.3720    1.5140 C   0  0  1  0  0  0  0  0  0  0  0  0
   -0.3730    0.0540    2.5990 H   0  0  0  0  0  0  0  0  0  0  0  0
    0.9520    0.3420    0.8880 C   0  0  0  0  0  0  0  0  0  0  0  0
    1.9470   -0.4240    1.4980 C   0  0  0  0  0  0  0  0  0  0  0  0
    3.2160   -0.4960    0.9330 C   0  0  0  0  0  0  0  0  0  0  0  0
    3.4880    0.2040   -0.2450 C   0  0  0  0  0  0  0  0  0  0  0  0
    4.8690    0.1120   -0.8160 C   0  0  0  0  0  0  0  0  0  0  0  0
    5.8280    0.5160    0.0230 F   0  0  0  0  0  0  0  0  0  0  0  0
    5.2380   -1.1270   -1.1510 F   0  0  0  0  0  0  0  0  0  0  0  0
    5.0990    0.8220   -1.9210 F   0  0  0  0  0  0  0  0  0  0  0  0
    2.4950    0.9590   -0.8660 C   0  0  0  0  0  0  0  0  0  0  0  0
    1.2250    1.0240   -0.2970 C   0  0  0  0  0  0  0  0  0  0  0  0
   -0.9690    1.7440    1.5000 N   0  0  0  0  0  0  0  0  0  0  0  0
   -3.3550    1.5540   -0.8240 H   0  0  0  0  0  0  0  0  0  0  0  0
   -3.4350   -1.9560   -0.2780 H   0  0  0  0  0  0  0  0  0  0  0  0
   -2.6130   -1.4220   -1.7430 H   0  0  0  0  0  0  0  0  0  0  0  0
   -1.6380   -4.6560   -0.6210 H   0  0  0  0  0  0  0  0  0  0  0  0
   -1.5520   -4.5410    1.1840 H   0  0  0  0  0  0  0  0  0  0  0  0
   -0.0600   -4.3320    0.2090 H   0  0  0  0  0  0  0  0  0  0  0  0
    1.7220   -0.9920    2.4050 H   0  0  0  0  0  0  0  0  0  0  0  0
    3.9850   -1.1020    1.4110 H   0  0  0  0  0  0  0  0  0  0  0  0
    2.6870    1.4990   -1.7940 H   0  0  0  0  0  0  0  0  0  0  0  0
    0.4400    1.6030   -0.7910 H   0  0  0  0  0  0  0  0  0  0  0  0
   -0.4730    2.4250    2.0660 H   0  0  0  0  0  0  0  0  0  0  0  0
  1  2  2  0  0  0  0
  2  3  1  0  0  0  0
  2 26  1  0  0  0  0
  3  4  1  0  0  0  0
  3 27  1  0  0  0  0
  4  5  1  0  0  0  0
  4  9  2  0  0  0  0
  5  6  1  0  0  0  0
  5 28  1  0  0  0  0
  5 29  1  0  0  0  0
  6  7  1  0  0  0  0
  6  8  1  0  0  0  0
  9 10  1  0  0  0  0
  9 14  1  0  0  0  0
 10 11  1  0  0  0  0
 10 13  2  0  0  0  0
 11 12  1  0  0  0  0
 12 30  1  0  0  0  0
 12 31  1  0  0  0  0
 12 32  1  0  0  0  0
 14 15  1  1  0  0  0
 14 16  1  0  0  0  0
 14 26  1  0  0  0  0
 16 17  2  0  0  0  0
 16 25  1  0  0  0  0
 17 18  1  0  0  0  0
 17 33  1  0  0  0  0
 18 19  2  0  0  0  0
 18 34  1  0  0  0  0
 19 20  1  0  0  0  0
 19 24  1  0  0  0  0
 20 21  1  0  0  0  0
 20 22  1  0  0  0  0
 20 23  1  0  0  0  0
 24 25  2  0  0  0  0
 24 35  1  0  0  0  0
 25 36  1  0  0  0  0
 26 37  1  0  0  0  0
M  CHG  2   7  -1   8  -1
M  END
$$$$
RDT19
 OpenBabel09302314563D

 42 43  0  0  1  0  0  0  0  0999 V2000
   -1.9460    3.8230    0.5300 S   0  0  0  0  0  0  0  0  0  0  0  0
   -1.6390    2.1570    0.6190 C   0  0  0  0  0  0  0  0  0  0  0  0
   -2.3660    1.2490   -0.1210 N   0  0  0  0  0  0  0  0  0  0  0  0
   -2.1470   -0.1240   -0.0570 C   0  0  0  0  0  0  0  0  0  0  0  0
   -3.0500   -1.0000   -0.8310 C   0  0  0  0  0  0  0  0  0  0  0  0
   -4.4940   -0.4560   -1.2020 C   0  0  0  0  0  3  0  0  0  0  0  0
   -4.5790    0.7670   -1.3880 O   0  5  0  0  0  0  0  0  0  0  0  0
   -5.3510   -1.3260   -1.3030 O   0  5  0  0  0  0  0  0  0  0  0  0
   -1.1000   -0.6010    0.6920 C   0  0  0  0  0  0  0  0  0  0  0  0
   -0.7400   -1.9930    0.8540 C   0  0  0  0  0  0  0  0  0  0  0  0
   -1.1740   -2.7650   -0.1850 O   0  0  0  0  0  0  0  0  0  0  0  0
   -0.8480   -4.1460   -0.1010 C   0  0  0  0  0  0  0  0  0  0  0  0
   -0.1030   -2.4830    1.7620 O   0  0  0  0  0  0  0  0  0  0  0  0
   -0.1680    0.3130    1.4360 C   0  0  1  0  0  0  0  0  0  0  0  0
   -0.0990   -0.0220    2.5150 H   0  0  0  0  0  0  0  0  0  0  0  0
    1.2070    0.2660    0.7950 C   0  0  0  0  0  0  0  0  0  0  0  0
    2.2100   -0.5020    1.3860 C   0  0  0  0  0  0  0  0  0  0  0  0
    3.4740   -0.5780    0.8140 C   0  0  0  0  0  0  0  0  0  0  0  0
    3.7560    0.1110   -0.3810 C   0  0  0  0  0  0  0  0  0  0  0  0
    5.0050   -0.0650   -1.0250 N   0  0  0  0  0  0  0  0  0  0  0  0
    6.1430   -0.3680   -0.1360 C   0  0  0  0  0  0  0  0  0  0  0  0
    5.3590    0.9490   -2.0360 C   0  0  0  0  0  0  0  0  0  0  0  0
    2.7330    0.8690   -0.9810 C   0  0  0  0  0  0  0  0  0  0  0  0
    1.4730    0.9330   -0.3990 C   0  0  0  0  0  0  0  0  0  0  0  0
   -0.6650    1.7030    1.4560 N   0  0  0  0  0  0  0  0  0  0  0  0
   -3.2180    1.5910   -0.6840 H   0  0  0  0  0  0  0  0  0  0  0  0
   -3.2130   -1.9680   -0.3100 H   0  0  0  0  0  0  0  0  0  0  0  0
   -2.5900   -1.2690   -1.8030 H   0  0  0  0  0  0  0  0  0  0  0  0
   -1.3030   -4.5600   -1.0080 H   0  0  0  0  0  0  0  0  0  0  0  0
   -1.2840   -4.5850    0.8020 H   0  0  0  0  0  0  0  0  0  0  0  0
    0.2380   -4.2770   -0.0990 H   0  0  0  0  0  0  0  0  0  0  0  0
    1.9940   -1.0700    2.2940 H   0  0  0  0  0  0  0  0  0  0  0  0
    4.2270   -1.1950    1.2910 H   0  0  0  0  0  0  0  0  0  0  0  0
    5.9970   -1.3720    0.3020 H   0  0  0  0  0  0  0  0  0  0  0  0
    6.2700    0.3610    0.6800 H   0  0  0  0  0  0  0  0  0  0  0  0
    7.0790   -0.4100   -0.7150 H   0  0  0  0  0  0  0  0  0  0  0  0
    4.6450    0.8760   -2.8780 H   0  0  0  0  0  0  0  0  0  0  0  0
    6.3570    0.7370   -2.4500 H   0  0  0  0  0  0  0  0  0  0  0  0
    5.3510    1.9800   -1.6500 H   0  0  0  0  0  0  0  0  0  0  0  0
    2.9050    1.4010   -1.9100 H   0  0  0  0  0  0  0  0  0  0  0  0
    0.6840    1.5090   -0.8900 H   0  0  0  0  0  0  0  0  0  0  0  0
   -0.0820    2.3720    1.9510 H   0  0  0  0  0  0  0  0  0  0  0  0
  1  2  2  0  0  0  0
  2  3  1  0  0  0  0
  2 25  1  0  0  0  0
  3  4  1  0  0  0  0
  3 26  1  0  0  0  0
  4  5  1  0  0  0  0
  4  9  2  0  0  0  0
  5  6  1  0  0  0  0
  5 27  1  0  0  0  0
  5 28  1  0  0  0  0
  6  7  1  0  0  0  0
  6  8  1  0  0  0  0
  9 10  1  0  0  0  0
  9 14  1  0  0  0  0
 10 11  1  0  0  0  0
 10 13  2  0  0  0  0
 11 12  1  0  0  0  0
 12 29  1  0  0  0  0
 12 30  1  0  0  0  0
 12 31  1  0  0  0  0
 14 15  1  1  0  0  0
 14 16  1  0  0  0  0
 14 25  1  0  0  0  0
 16 17  2  0  0  0  0
 16 24  1  0  0  0  0
 17 18  1  0  0  0  0
 17 32  1  0  0  0  0
 18 19  2  0  0  0  0
 18 33  1  0  0  0  0
 19 20  1  0  0  0  0
 19 23  1  0  0  0  0
 20 21  1  0  0  0  0
 20 22  1  0  0  0  0
 21 34  1  0  0  0  0
 21 35  1  0  0  0  0
 21 36  1  0  0  0  0
 22 37  1  0  0  0  0
 22 38  1  0  0  0  0
 22 39  1  0  0  0  0
 23 24  2  0  0  0  0
 23 40  1  0  0  0  0
 24 41  1  0  0  0  0
 25 42  1  0  0  0  0
M  CHG  2   7  -1   8  -1
M  END
$$$$
RDT20
 OpenBabel09302314563D

 34 35  0  0  1  0  0  0  0  0999 V2000
   -2.3050    3.8190    0.4690 S   0  0  0  0  0  0  0  0  0  0  0  0
   -1.9550    2.1680    0.5870 C   0  0  0  0  0  0  0  0  0  0  0  0
   -2.6080    1.2310   -0.1870 N   0  0  0  0  0  0  0  0  0  0  0  0
   -2.3790   -0.1350   -0.0720 C   0  0  0  0  0  0  0  0  0  0  0  0
   -3.2250   -1.0470   -0.8680 C   0  0  0  0  0  0  0  0  0  0  0  0
   -4.6120   -0.5160   -1.4320 C   0  0  0  0  0  3  0  0  0  0  0  0
   -4.6690    0.7000   -1.6730 O   0  5  0  0  0  0  0  0  0  0  0  0
   -5.4530   -1.3900   -1.5990 O   0  5  0  0  0  0  0  0  0  0  0  0
   -1.3720   -0.5780    0.7530 C   0  0  0  0  0  0  0  0  0  0  0  0
   -1.0200   -1.9600    0.9930 C   0  0  0  0  0  0  0  0  0  0  0  0
   -1.4730   -2.7970    0.0170 O   0  0  0  0  0  0  0  0  0  0  0  0
   -1.1590   -4.1730    0.1910 C   0  0  0  0  0  0  0  0  0  0  0  0
   -0.3690   -2.3920    1.9220 O   0  0  0  0  0  0  0  0  0  0  0  0
   -0.4890    0.3720    1.5080 C   0  0  1  0  0  0  0  0  0  0  0  0
   -0.4430    0.0610    2.5950 H   0  0  0  0  0  0  0  0  0  0  0  0
    0.9080    0.3350    0.9040 C   0  0  0  0  0  0  0  0  0  0  0  0
    1.8940   -0.4220    1.5390 C   0  0  0  0  0  0  0  0  0  0  0  0
    3.1750   -0.5030    0.9960 C   0  0  0  0  0  0  0  0  0  0  0  0
    3.4400    0.1830   -0.1810 C   0  0  0  0  0  0  0  0  0  0  0  0
    5.1930    0.0850   -0.9250 Br  0  0  0  0  0  0  0  0  0  0  0  0
    2.4740    0.9330   -0.8390 C   0  0  0  0  0  0  0  0  0  0  0  0
    1.1950    1.0020   -0.2880 C   0  0  0  0  0  0  0  0  0  0  0  0
   -1.0140    1.7490    1.4800 N   0  0  0  0  0  0  0  0  0  0  0  0
   -3.4130    1.5520   -0.8290 H   0  0  0  0  0  0  0  0  0  0  0  0
   -3.4670   -1.9680   -0.2940 H   0  0  0  0  0  0  0  0  0  0  0  0
   -2.6770   -1.4020   -1.7650 H   0  0  0  0  0  0  0  0  0  0  0  0
   -1.6320   -4.6420   -0.6780 H   0  0  0  0  0  0  0  0  0  0  0  0
   -1.5830   -4.5440    1.1290 H   0  0  0  0  0  0  0  0  0  0  0  0
   -0.0740   -4.3150    0.1860 H   0  0  0  0  0  0  0  0  0  0  0  0
    1.6550   -0.9780    2.4490 H   0  0  0  0  0  0  0  0  0  0  0  0
    3.9360   -1.1010    1.4930 H   0  0  0  0  0  0  0  0  0  0  0  0
    2.6910    1.4560   -1.7690 H   0  0  0  0  0  0  0  0  0  0  0  0
    0.4170    1.5730   -0.7990 H   0  0  0  0  0  0  0  0  0  0  0  0
   -0.5010    2.4340    2.0260 H   0  0  0  0  0  0  0  0  0  0  0  0
  1  2  2  0  0  0  0
  2  3  1  0  0  0  0
  2 23  1  0  0  0  0
  3  4  1  0  0  0  0
  3 24  1  0  0  0  0
  4  5  1  0  0  0  0
  4  9  2  0  0  0  0
  5  6  1  0  0  0  0
  5 25  1  0  0  0  0
  5 26  1  0  0  0  0
  6  7  1  0  0  0  0
  6  8  1  0  0  0  0
  9 10  1  0  0  0  0
  9 14  1  0  0  0  0
 10 11  1  0  0  0  0
 10 13  2  0  0  0  0
 11 12  1  0  0  0  0
 12 27  1  0  0  0  0
 12 28  1  0  0  0  0
 12 29  1  0  0  0  0
 14 15  1  1  0  0  0
 14 16  1  0  0  0  0
 14 23  1  0  0  0  0
 16 17  2  0  0  0  0
 16 22  1  0  0  0  0
 17 18  1  0  0  0  0
 17 30  1  0  0  0  0
 18 19  2  0  0  0  0
 18 31  1  0  0  0  0
 19 20  1  0  0  0  0
 19 21  1  0  0  0  0
 21 22  2  0  0  0  0
 21 32  1  0  0  0  0
 22 33  1  0  0  0  0
 23 34  1  0  0  0  0
M  CHG  2   7  -1   8  -1
M  END
$$$$
RDT21
 OpenBabel09302314563D

 33 34  0  0  1  0  0  0  0  0999 V2000
    0.1700   -2.0280   -2.8260 O   0  0  0  0  0  0  0  0  0  0  0  0
   -0.0090   -1.8270   -1.6480 C   0  0  0  0  0  0  0  0  0  0  0  0
    0.0260   -2.9480   -0.8730 O   0  0  0  0  0  0  0  0  0  0  0  0
   -0.0290   -2.8290    0.5400 C   0  0  0  0  0  0  0  0  0  0  0  0
   -0.2190   -0.5050   -1.0560 C   0  0  0  0  0  0  0  0  0  0  0  0
    0.9290    0.4400   -1.2140 C   0  0  2  0  0  0  0  0  0  0  0  0
    1.4350    0.2710   -2.2140 H   0  0  0  0  0  0  0  0  0  0  0  0
    1.9470    0.2370   -0.0870 C   0  0  0  0  0  0  0  0  0  0  0  0
    3.2200    0.0590   -0.4880 N   0  0  0  0  0  0  0  0  0  0  0  0
    4.1660   -0.1380    0.4480 C   0  0  0  0  0  0  0  0  0  0  0  0
    3.8790   -0.1520    1.8190 C   0  0  0  0  0  0  0  0  0  0  0  0
    2.5600    0.0510    2.2250 C   0  0  0  0  0  0  0  0  0  0  0  0
    1.5740    0.2500    1.2640 C   0  0  0  0  0  0  0  0  0  0  0  0
    0.4810    1.8440   -1.1610 N   0  0  0  0  0  0  0  0  0  0  0  0
   -1.3990   -0.0890   -0.5170 C   0  0  0  0  0  0  0  0  0  0  0  0
   -2.5900   -0.9280   -0.3040 C   0  0  0  0  0  0  0  0  0  0  0  0
   -3.0320   -0.8400    1.2360 C   0  0  0  0  0  3  0  0  0  0  0  0
   -3.1560    0.3270    1.6350 O   0  5  0  0  0  0  0  0  0  0  0  0
   -3.1850   -1.9110    1.8020 O   0  5  0  0  0  0  0  0  0  0  0  0
   -1.5570    1.2540   -0.1440 N   0  0  0  0  0  0  0  0  0  0  0  0
   -0.6580    2.2260   -0.5120 C   0  0  0  0  0  0  0  0  0  0  0  0
   -0.9630    3.8710   -0.2490 S   0  0  0  0  0  0  0  0  0  0  0  0
    0.3750   -3.7890    0.8790 H   0  0  0  0  0  0  0  0  0  0  0  0
   -1.0770   -2.7220    0.8630 H   0  0  0  0  0  0  0  0  0  0  0  0
    0.5800   -2.0010    0.9090 H   0  0  0  0  0  0  0  0  0  0  0  0
    5.1820   -0.2870    0.0720 H   0  0  0  0  0  0  0  0  0  0  0  0
    4.6670   -0.3150    2.5430 H   0  0  0  0  0  0  0  0  0  0  0  0
    2.3040    0.0530    3.2840 H   0  0  0  0  0  0  0  0  0  0  0  0
    0.5320    0.4130    1.5510 H   0  0  0  0  0  0  0  0  0  0  0  0
    1.1370    2.5420   -1.4930 H   0  0  0  0  0  0  0  0  0  0  0  0
   -2.4430   -1.9850   -0.5760 H   0  0  0  0  0  0  0  0  0  0  0  0
   -3.4670   -0.5760   -0.8740 H   0  0  0  0  0  0  0  0  0  0  0  0
   -2.3640    1.4650    0.5340 H   0  0  0  0  0  0  0  0  0  0  0  0
  1  2  2  0  0  0  0
  2  3  1  0  0  0  0
  2  5  1  0  0  0  0
  3  4  1  0  0  0  0
  4 23  1  0  0  0  0
  4 24  1  0  0  0  0
  4 25  1  0  0  0  0
  5  6  1  0  0  0  0
  5 15  2  0  0  0  0
  6  7  1  6  0  0  0
  6  8  1  0  0  0  0
  6 14  1  0  0  0  0
  8  9  2  0  0  0  0
  8 13  1  0  0  0  0
  9 10  1  0  0  0  0
 10 11  2  0  0  0  0
 10 26  1  0  0  0  0
 11 12  1  0  0  0  0
 11 27  1  0  0  0  0
 12 13  2  0  0  0  0
 12 28  1  0  0  0  0
 13 29  1  0  0  0  0
 14 21  1  0  0  0  0
 14 30  1  0  0  0  0
 15 16  1  0  0  0  0
 15 20  1  0  0  0  0
 16 17  1  0  0  0  0
 16 31  1  0  0  0  0
 16 32  1  0  0  0  0
 17 18  1  0  0  0  0
 17 19  1  0  0  0  0
 20 21  1  0  0  0  0
 20 33  1  0  0  0  0
 21 22  2  0  0  0  0
M  CHG  2  18  -1  19  -1
M  END
$$$$
RDT22
 OpenBabel09302314563D

 31 32  0  0  1  0  0  0  0  0999 V2000
    0.5090   -2.4360   -2.0360 O   0  0  0  0  0  0  0  0  0  0  0  0
   -0.1640   -1.9190   -1.1730 C   0  0  0  0  0  0  0  0  0  0  0  0
   -0.8980   -2.6750   -0.3090 O   0  0  0  0  0  0  0  0  0  0  0  0
   -0.8550   -4.0790   -0.5180 C   0  0  0  0  0  0  0  0  0  0  0  0
   -0.2710   -0.5060   -0.8650 C   0  0  0  0  0  0  0  0  0  0  0  0
    1.0360    0.2190   -1.0250 C   0  0  2  0  0  0  0  0  0  0  0  0
    1.5210   -0.1100   -1.9950 H   0  0  0  0  0  0  0  0  0  0  0  0
    1.9330   -0.0700    0.1430 C   0  0  0  0  0  0  0  0  0  0  0  0
    1.5610   -0.4440    1.3990 C   0  0  0  0  0  0  0  0  0  0  0  0
    2.6720   -0.6320    2.2920 C   0  0  0  0  0  0  0  0  0  0  0  0
    3.8810   -0.3980    1.7080 C   0  0  0  0  0  0  0  0  0  0  0  0
    3.6770    0.0540    0.0390 S   0  0  0  0  0  0  0  0  0  0  0  0
    0.8280    1.6800   -1.1170 N   0  0  0  0  0  0  0  0  0  0  0  0
   -1.4050    0.1430   -0.4560 C   0  0  0  0  0  0  0  0  0  0  0  0
   -2.7300   -0.4710   -0.2640 C   0  0  0  0  0  0  0  0  0  0  0  0
   -3.4280   -0.0340    1.1150 C   0  0  0  0  0  3  0  0  0  0  0  0
   -4.0040   -0.9290    1.7110 O   0  5  0  0  0  0  0  0  0  0  0  0
   -3.3220    1.1760    1.3630 O   0  5  0  0  0  0  0  0  0  0  0  0
   -1.3700    1.5280   -0.2730 N   0  0  0  0  0  0  0  0  0  0  0  0
   -0.2800    2.2960   -0.6120 C   0  0  0  0  0  0  0  0  0  0  0  0
   -0.3210    3.9890   -0.5220 S   0  0  0  0  0  0  0  0  0  0  0  0
   -1.5230   -4.4580    0.2660 H   0  0  0  0  0  0  0  0  0  0  0  0
    0.1660   -4.4480   -0.3890 H   0  0  0  0  0  0  0  0  0  0  0  0
   -1.2250   -4.3290   -1.5160 H   0  0  0  0  0  0  0  0  0  0  0  0
    0.5330   -0.5970    1.7180 H   0  0  0  0  0  0  0  0  0  0  0  0
    2.5260   -0.9260    3.3200 H   0  0  0  0  0  0  0  0  0  0  0  0
    4.8500   -0.4650    2.1600 H   0  0  0  0  0  0  0  0  0  0  0  0
    1.6360    2.2370   -1.3690 H   0  0  0  0  0  0  0  0  0  0  0  0
   -2.7110   -1.5740   -0.2760 H   0  0  0  0  0  0  0  0  0  0  0  0
   -3.4470   -0.1550   -1.0410 H   0  0  0  0  0  0  0  0  0  0  0  0
   -2.1910    1.9610    0.2750 H   0  0  0  0  0  0  0  0  0  0  0  0
  1  2  2  0  0  0  0
  2  3  1  0  0  0  0
  2  5  1  0  0  0  0
  3  4  1  0  0  0  0
  4 22  1  0  0  0  0
  4 23  1  0  0  0  0
  4 24  1  0  0  0  0
  5  6  1  0  0  0  0
  5 14  2  0  0  0  0
  6  7  1  6  0  0  0
  6  8  1  0  0  0  0
  6 13  1  0  0  0  0
  8  9  2  0  0  0  0
  8 12  1  0  0  0  0
  9 10  1  0  0  0  0
  9 25  1  0  0  0  0
 10 11  2  0  0  0  0
 10 26  1  0  0  0  0
 11 12  1  0  0  0  0
 11 27  1  0  0  0  0
 13 20  1  0  0  0  0
 13 28  1  0  0  0  0
 14 15  1  0  0  0  0
 14 19  1  0  0  0  0
 15 16  1  0  0  0  0
 15 29  1  0  0  0  0
 15 30  1  0  0  0  0
 16 17  1  0  0  0  0
 16 18  1  0  0  0  0
 19 20  1  0  0  0  0
 19 31  1  0  0  0  0
 20 21  2  0  0  0  0
M  CHG  2  17  -1  18  -1
M  END
$$$$
RDT23
 OpenBabel09302314563D

 38 40  0  0  1  0  0  0  0  0999 V2000
    0.2050   -2.3720    2.5030 O   0  0  0  0  0  0  0  0  0  0  0  0
   -0.3350   -1.9590    1.4990 C   0  0  0  0  0  0  0  0  0  0  0  0
   -0.6610   -2.8040    0.4830 O   0  0  0  0  0  0  0  0  0  0  0  0
   -0.3160   -4.1690    0.6700 C   0  0  0  0  0  0  0  0  0  0  0  0
   -0.6730   -0.5830    1.1880 C   0  0  0  0  0  0  0  0  0  0  0  0
    0.3200    0.3860    1.7650 C   0  0  1  0  0  0  0  0  0  0  0  0
    0.4830    0.1340    2.8580 H   0  0  0  0  0  0  0  0  0  0  0  0
    1.6210    0.3170    1.0330 C   0  0  0  0  0  0  0  0  0  0  0  0
    2.8610    0.1960    1.6370 C   0  0  0  0  0  0  0  0  0  0  0  0
    3.8570    0.1460    0.6580 N   0  0  0  0  0  0  0  0  0  0  0  0
    3.2440    0.2200   -0.5950 C   0  0  0  0  0  0  0  0  0  0  0  0
    1.8310    0.3320   -0.3920 C   0  0  0  0  0  0  0  0  0  0  0  0
    0.9950    0.4090   -1.5110 C   0  0  0  0  0  0  0  0  0  0  0  0
    1.5640    0.3810   -2.7720 C   0  0  0  0  0  0  0  0  0  0  0  0
    2.9580    0.2780   -2.9510 C   0  0  0  0  0  0  0  0  0  0  0  0
    3.8200    0.1960   -1.8710 C   0  0  0  0  0  0  0  0  0  0  0  0
   -0.1910    1.7760    1.7290 N   0  0  0  0  0  0  0  0  0  0  0  0
   -1.7330   -0.1620    0.4350 C   0  0  0  0  0  0  0  0  0  0  0  0
   -2.7470   -1.0130   -0.2110 C   0  0  0  0  0  0  0  0  0  0  0  0
   -2.8950   -0.6760   -1.7730 C   0  0  0  0  0  3  0  0  0  0  0  0
   -2.7640    0.5310   -2.0320 O   0  5  0  0  0  0  0  0  0  0  0  0
   -3.1520   -1.6280   -2.4910 O   0  5  0  0  0  0  0  0  0  0  0  0
   -1.9600    1.2130    0.2750 N   0  0  0  0  0  0  0  0  0  0  0  0
   -1.1980    2.1720    0.9040 C   0  0  0  0  0  0  0  0  0  0  0  0
   -1.5720    3.8240    0.7670 S   0  0  0  0  0  0  0  0  0  0  0  0
   -0.6650   -4.6330   -0.2600 H   0  0  0  0  0  0  0  0  0  0  0  0
   -0.8320   -4.5770    1.5440 H   0  0  0  0  0  0  0  0  0  0  0  0
    0.7670   -4.2710    0.7880 H   0  0  0  0  0  0  0  0  0  0  0  0
    3.1060    0.1260    2.6790 H   0  0  0  0  0  0  0  0  0  0  0  0
    4.8250    0.0270    0.8210 H   0  0  0  0  0  0  0  0  0  0  0  0
   -0.0920    0.4810   -1.4000 H   0  0  0  0  0  0  0  0  0  0  0  0
    0.9180    0.4330   -3.6490 H   0  0  0  0  0  0  0  0  0  0  0  0
    3.3580    0.2610   -3.9620 H   0  0  0  0  0  0  0  0  0  0  0  0
    4.8890    0.1150   -2.0010 H   0  0  0  0  0  0  0  0  0  0  0  0
    0.4100    2.4760    2.1510 H   0  0  0  0  0  0  0  0  0  0  0  0
   -3.7560   -0.8540    0.2030 H   0  0  0  0  0  0  0  0  0  0  0  0
   -2.5390   -2.0930   -0.1340 H   0  0  0  0  0  0  0  0  0  0  0  0
   -2.5780    1.4870   -0.5610 H   0  0  0  0  0  0  0  0  0  0  0  0
  1  2  2  0  0  0  0
  2  3  1  0  0  0  0
  2  5  1  0  0  0  0
  3  4  1  0  0  0  0
  4 26  1  0  0  0  0
  4 27  1  0  0  0  0
  4 28  1  0  0  0  0
  5  6  1  0  0  0  0
  5 18  2  0  0  0  0
  6  7  1  1  0  0  0
  6  8  1  0  0  0  0
  6 17  1  0  0  0  0
  8  9  2  0  0  0  0
  8 12  1  0  0  0  0
  9 10  1  0  0  0  0
  9 29  1  0  0  0  0
 10 11  1  0  0  0  0
 10 30  1  0  0  0  0
 11 12  2  0  0  0  0
 11 16  1  0  0  0  0
 12 13  1  0  0  0  0
 13 14  2  0  0  0  0
 13 31  1  0  0  0  0
 14 15  1  0  0  0  0
 14 32  1  0  0  0  0
 15 16  2  0  0  0  0
 15 33  1  0  0  0  0
 16 34  1  0  0  0  0
 17 24  1  0  0  0  0
 17 35  1  0  0  0  0
 18 19  1  0  0  0  0
 18 23  1  0  0  0  0
 19 20  1  0  0  0  0
 19 36  1  0  0  0  0
 19 37  1  0  0  0  0
 20 21  1  0  0  0  0
 20 22  1  0  0  0  0
 23 24  1  0  0  0  0
 23 38  1  0  0  0  0
 24 25  2  0  0  0  0
M  CHG  2  21  -1  22  -1
M  END
$$$$
RDT24
 OpenBabel09302314563D

 38 39  0  0  1  0  0  0  0  0999 V2000
    1.1650   -2.2570   -2.7740 O   0  0  0  0  0  0  0  0  0  0  0  0
    0.9940   -1.9020   -1.6310 C   0  0  0  0  0  0  0  0  0  0  0  0
    0.5010   -2.8650   -0.8030 O   0  0  0  0  0  0  0  0  0  0  0  0
    0.1680   -2.5290    0.5380 C   0  0  0  0  0  0  0  0  0  0  0  0
    1.2080   -0.5410   -1.1360 C   0  0  0  0  0  0  0  0  0  0  0  0
    0.2980    0.4720   -1.7650 C   0  0  1  0  0  0  0  0  0  0  0  0
    0.3680    0.3830   -2.8920 H   0  0  0  0  0  0  0  0  0  0  0  0
   -1.1220    0.1850   -1.3270 C   0  0  0  0  0  0  0  0  0  0  0  0
   -1.6910    0.7070   -0.2370 C   0  0  0  0  0  0  0  0  0  0  0  0
   -3.0510    0.3660    0.1780 C   0  0  0  0  0  0  0  0  0  0  0  0
   -3.9170    1.3780    0.6060 C   0  0  0  0  0  0  0  0  0  0  0  0
   -5.2170    1.0650    0.9940 C   0  0  0  0  0  0  0  0  0  0  0  0
   -5.6570   -0.2580    0.9670 C   0  0  0  0  0  0  0  0  0  0  0  0
   -4.7920   -1.2690    0.5540 C   0  0  0  0  0  0  0  0  0  0  0  0
   -3.4930   -0.9600    0.1590 C   0  0  0  0  0  0  0  0  0  0  0  0
    0.6980    1.8520   -1.4230 N   0  0  0  0  0  0  0  0  0  0  0  0
    2.1770   -0.1900   -0.2500 C   0  0  0  0  0  0  0  0  0  0  0  0
    3.1510   -1.1190    0.3500 C   0  0  0  0  0  0  0  0  0  0  0  0
    3.1410   -0.9710    1.9470 C   0  0  0  0  0  3  0  0  0  0  0  0
    3.2950    0.1990    2.3240 O   0  5  0  0  0  0  0  0  0  0  0  0
    2.9900   -2.0110    2.5690 O   0  5  0  0  0  0  0  0  0  0  0  0
    2.3270    1.1510    0.1320 N   0  0  0  0  0  0  0  0  0  0  0  0
    1.5820    2.1570   -0.4290 C   0  0  0  0  0  0  0  0  0  0  0  0
    1.7870    3.7820    0.0200 S   0  0  0  0  0  0  0  0  0  0  0  0
   -0.5150   -3.3340    0.8280 H   0  0  0  0  0  0  0  0  0  0  0  0
   -0.3180   -1.5530    0.6140 H   0  0  0  0  0  0  0  0  0  0  0  0
    1.0780   -2.5620    1.1590 H   0  0  0  0  0  0  0  0  0  0  0  0
   -1.6360   -0.5310   -1.9660 H   0  0  0  0  0  0  0  0  0  0  0  0
   -1.1690    1.4200    0.4100 H   0  0  0  0  0  0  0  0  0  0  0  0
   -3.5730    2.4110    0.6340 H   0  0  0  0  0  0  0  0  0  0  0  0
   -5.8900    1.8530    1.3220 H   0  0  0  0  0  0  0  0  0  0  0  0
   -6.6700   -0.5000    1.2730 H   0  0  0  0  0  0  0  0  0  0  0  0
   -5.1310   -2.3020    0.5420 H   0  0  0  0  0  0  0  0  0  0  0  0
   -2.8140   -1.7540   -0.1570 H   0  0  0  0  0  0  0  0  0  0  0  0
    0.1530    2.5920   -1.8500 H   0  0  0  0  0  0  0  0  0  0  0  0
    4.1890   -0.8920    0.0490 H   0  0  0  0  0  0  0  0  0  0  0  0
    2.9710   -2.1740    0.0890 H   0  0  0  0  0  0  0  0  0  0  0  0
    2.9110    1.3260    1.0200 H   0  0  0  0  0  0  0  0  0  0  0  0
  1  2  2  0  0  0  0
  2  3  1  0  0  0  0
  2  5  1  0  0  0  0
  3  4  1  0  0  0  0
  4 25  1  0  0  0  0
  4 26  1  0  0  0  0
  4 27  1  0  0  0  0
  5  6  1  0  0  0  0
  5 17  2  0  0  0  0
  6  7  1  6  0  0  0
  6  8  1  0  0  0  0
  6 16  1  0  0  0  0
  8  9  2  0  0  0  0
  8 28  1  0  0  0  0
  9 10  1  0  0  0  0
  9 29  1  0  0  0  0
 10 11  2  0  0  0  0
 10 15  1  0  0  0  0
 11 12  1  0  0  0  0
 11 30  1  0  0  0  0
 12 13  2  0  0  0  0
 12 31  1  0  0  0  0
 13 14  1  0  0  0  0
 13 32  1  0  0  0  0
 14 15  2  0  0  0  0
 14 33  1  0  0  0  0
 15 34  1  0  0  0  0
 16 23  1  0  0  0  0
 16 35  1  0  0  0  0
 17 18  1  0  0  0  0
 17 22  1  0  0  0  0
 18 19  1  0  0  0  0
 18 36  1  0  0  0  0
 18 37  1  0  0  0  0
 19 20  1  0  0  0  0
 19 21  1  0  0  0  0
 22 23  1  0  0  0  0
 22 38  1  0  0  0  0
 23 24  2  0  0  0  0
M  CHG  2  20  -1  21  -1
M  END
$$$$
RDT25
 OpenBabel09302314563D

 42 43  0  0  1  0  0  0  0  0999 V2000
   -1.5740    2.6830   -1.9590 O   0  0  0  0  0  0  0  0  0  0  0  0
   -2.1330    2.0490   -1.0880 C   0  0  0  0  0  0  0  0  0  0  0  0
   -3.0620    2.6500   -0.2850 O   0  0  0  0  0  0  0  0  0  0  0  0
   -3.2210    4.0490   -0.4730 C   0  0  0  0  0  0  0  0  0  0  0  0
   -1.9790    0.6450   -0.8030 C   0  0  0  0  0  0  0  0  0  0  0  0
   -1.1940   -0.0890   -1.8560 C   0  0  1  0  0  0  0  0  0  0  0  0
   -1.4470    0.3090   -2.8810 H   0  0  0  0  0  0  0  0  0  0  0  0
    0.2740    0.1440   -1.5790 C   0  0  0  0  0  0  0  0  0  0  0  0
    1.0530   -0.6850   -0.8790 C   0  0  0  0  0  0  0  0  0  0  0  0
    2.4450   -0.3780   -0.5550 C   0  0  0  0  0  0  0  0  0  0  0  0
    3.3450    0.0340   -1.5450 C   0  0  0  0  0  0  0  0  0  0  0  0
    4.6650    0.3210   -1.2230 C   0  0  0  0  0  0  0  0  0  0  0  0
    5.0720    0.1980    0.1130 C   0  0  0  0  0  0  0  0  0  0  0  0
    6.3900    0.5050    0.2960 O   0  0  0  0  0  0  0  0  0  0  0  0
    6.8800    0.4630    1.6280 C   0  0  0  0  0  0  0  0  0  0  0  0
    4.1910   -0.2050    1.1160 C   0  0  0  0  0  0  0  0  0  0  0  0
    2.8740   -0.4960    0.7700 C   0  0  0  0  0  0  0  0  0  0  0  0
   -1.5360   -1.5260   -1.8560 N   0  0  0  0  0  0  0  0  0  0  0  0
   -2.4330   -0.0150    0.3160 C   0  0  0  0  0  0  0  0  0  0  0  0
   -2.9880    0.6410    1.5120 C   0  0  0  0  0  0  0  0  0  0  0  0
   -2.5700   -0.0270    2.9030 C   0  0  0  0  0  3  0  0  0  0  0  0
   -2.5390   -1.2660    2.8950 O   0  5  0  0  0  0  0  0  0  0  0  0
   -2.3700    0.7660    3.8110 O   0  5  0  0  0  0  0  0  0  0  0  0
   -2.4110   -1.4070    0.3320 N   0  0  0  0  0  0  0  0  0  0  0  0
   -2.0410   -2.1610   -0.7650 C   0  0  0  0  0  0  0  0  0  0  0  0
   -2.2560   -3.8420   -0.7970 S   0  0  0  0  0  0  0  0  0  0  0  0
   -3.9630    4.3160    0.2870 H   0  0  0  0  0  0  0  0  0  0  0  0
   -3.5860    4.2560   -1.4830 H   0  0  0  0  0  0  0  0  0  0  0  0
   -2.2710    4.5650   -0.3030 H   0  0  0  0  0  0  0  0  0  0  0  0
    0.6240    1.1100   -1.9470 H   0  0  0  0  0  0  0  0  0  0  0  0
    0.6860   -1.6330   -0.4760 H   0  0  0  0  0  0  0  0  0  0  0  0
    3.0060    0.1280   -2.5760 H   0  0  0  0  0  0  0  0  0  0  0  0
    5.3740    0.6380   -1.9790 H   0  0  0  0  0  0  0  0  0  0  0  0
    7.9260    0.7680    1.5030 H   0  0  0  0  0  0  0  0  0  0  0  0
    6.8230   -0.5530    2.0320 H   0  0  0  0  0  0  0  0  0  0  0  0
    6.3460    1.1770    2.2630 H   0  0  0  0  0  0  0  0  0  0  0  0
    4.5100   -0.2930    2.1470 H   0  0  0  0  0  0  0  0  0  0  0  0
    2.1650   -0.8060    1.5430 H   0  0  0  0  0  0  0  0  0  0  0  0
   -1.2630   -2.0600   -2.6720 H   0  0  0  0  0  0  0  0  0  0  0  0
   -4.0920    0.6330    1.5120 H   0  0  0  0  0  0  0  0  0  0  0  0
   -2.6910    1.7070    1.5810 H   0  0  0  0  0  0  0  0  0  0  0  0
   -2.6230   -1.8950    1.2670 H   0  0  0  0  0  0  0  0  0  0  0  0
  1  2  2  0  0  0  0
  2  3  1  0  0  0  0
  2  5  1  0  0  0  0
  3  4  1  0  0  0  0
  4 27  1  0  0  0  0
  4 28  1  0  0  0  0
  4 29  1  0  0  0  0
  5  6  1  0  0  0  0
  5 19  2  0  0  0  0
  6  7  1  6  0  0  0
  6  8  1  0  0  0  0
  6 18  1  0  0  0  0
  8  9  2  0  0  0  0
  8 30  1  0  0  0  0
  9 10  1  0  0  0  0
  9 31  1  0  0  0  0
 10 11  2  0  0  0  0
 10 17  1  0  0  0  0
 11 12  1  0  0  0  0
 11 32  1  0  0  0  0
 12 13  2  0  0  0  0
 12 33  1  0  0  0  0
 13 14  1  0  0  0  0
 13 16  1  0  0  0  0
 14 15  1  0  0  0  0
 15 34  1  0  0  0  0
 15 35  1  0  0  0  0
 15 36  1  0  0  0  0
 16 17  2  0  0  0  0
 16 37  1  0  0  0  0
 17 38  1  0  0  0  0
 18 25  1  0  0  0  0
 18 39  1  0  0  0  0
 19 20  1  0  0  0  0
 19 24  1  0  0  0  0
 20 21  1  0  0  0  0
 20 40  1  0  0  0  0
 20 41  1  0  0  0  0
 21 22  1  0  0  0  0
 21 23  1  0  0  0  0
 24 25  1  0  0  0  0
 24 42  1  0  0  0  0
 25 26  2  0  0  0  0
M  CHG  2  22  -1  23  -1
M  END
$$$$
RDT26
 OpenBabel09302314563D

 38 39  0  0  1  0  0  0  0  0999 V2000
    1.6970   -3.1840   -0.3960 O   0  0  0  0  0  0  0  0  0  0  0  0
    1.0960   -2.2010   -0.7600 C   0  0  0  0  0  0  0  0  0  0  0  0
   -0.1200   -2.3500   -1.3970 O   0  0  0  0  0  0  0  0  0  0  0  0
   -0.5830   -3.6860   -1.5140 C   0  0  0  0  0  0  0  0  0  0  0  0
    1.4580   -0.8090   -0.6720 C   0  0  0  0  0  0  0  0  0  0  0  0
    0.6370    0.1600   -1.4680 C   0  0  1  0  0  0  0  0  0  0  0  0
    0.3970   -0.2670   -2.4840 H   0  0  0  0  0  0  0  0  0  0  0  0
   -0.6270    0.4800   -0.6990 C   0  0  0  0  0  0  0  0  0  0  0  0
   -1.8190    0.0130   -1.0850 C   0  0  0  0  0  0  0  0  0  0  0  0
   -3.0570    0.2630   -0.3520 C   0  0  0  0  0  0  0  0  0  0  0  0
   -4.0060   -0.7610   -0.2470 C   0  0  0  0  0  0  0  0  0  0  0  0
   -5.2030   -0.5520    0.4310 C   0  0  0  0  0  0  0  0  0  0  0  0
   -5.4230    0.7030    0.9950 C   0  0  0  0  0  0  0  0  0  0  0  0
   -6.5660    0.9170    1.6350 F   0  0  0  0  0  0  0  0  0  0  0  0
   -4.5000    1.7430    0.9160 C   0  0  0  0  0  0  0  0  0  0  0  0
   -3.3080    1.5090    0.2350 C   0  0  0  0  0  0  0  0  0  0  0  0
    1.3700    1.4230   -1.7030 N   0  0  0  0  0  0  0  0  0  0  0  0
    2.4990   -0.3680    0.1170 C   0  0  0  0  0  0  0  0  0  0  0  0
    3.2550   -1.2040    1.0620 C   0  0  0  0  0  0  0  0  0  0  0  0
    3.5370   -0.4900    2.4690 C   0  0  0  0  0  3  0  0  0  0  0  0
    3.9030    0.6920    2.3680 O   0  5  0  0  0  0  0  0  0  0  0  0
    3.3930   -1.2000    3.4500 O   0  5  0  0  0  0  0  0  0  0  0  0
    2.9210    0.9550    0.0100 N   0  0  0  0  0  0  0  0  0  0  0  0
    2.4120    1.8290   -0.9280 C   0  0  0  0  0  0  0  0  0  0  0  0
    3.0860    3.3630   -1.1770 S   0  0  0  0  0  0  0  0  0  0  0  0
   -1.5450   -3.5760   -2.0210 H   0  0  0  0  0  0  0  0  0  0  0  0
   -0.7030   -4.1300   -0.5190 H   0  0  0  0  0  0  0  0  0  0  0  0
    0.1180   -4.2800   -2.1090 H   0  0  0  0  0  0  0  0  0  0  0  0
   -0.4800    1.0760    0.2010 H   0  0  0  0  0  0  0  0  0  0  0  0
   -1.9210   -0.6230   -1.9680 H   0  0  0  0  0  0  0  0  0  0  0  0
   -3.7980   -1.7350   -0.6910 H   0  0  0  0  0  0  0  0  0  0  0  0
   -5.9390   -1.3460    0.5210 H   0  0  0  0  0  0  0  0  0  0  0  0
   -4.6970    2.7090    1.3750 H   0  0  0  0  0  0  0  0  0  0  0  0
   -2.5630    2.3030    0.1590 H   0  0  0  0  0  0  0  0  0  0  0  0
    0.9990    2.0390   -2.4150 H   0  0  0  0  0  0  0  0  0  0  0  0
    4.2550   -1.4700    0.6780 H   0  0  0  0  0  0  0  0  0  0  0  0
    2.7520   -2.1680    1.2810 H   0  0  0  0  0  0  0  0  0  0  0  0
    3.6040    1.3150    0.7630 H   0  0  0  0  0  0  0  0  0  0  0  0
  1  2  2  0  0  0  0
  2  3  1  0  0  0  0
  2  5  1  0  0  0  0
  3  4  1  0  0  0  0
  4 26  1  0  0  0  0
  4 27  1  0  0  0  0
  4 28  1  0  0  0  0
  5  6  1  0  0  0  0
  5 18  2  0  0  0  0
  6  7  1  6  0  0  0
  6  8  1  0  0  0  0
  6 17  1  0  0  0  0
  8  9  2  0  0  0  0
  8 29  1  0  0  0  0
  9 10  1  0  0  0  0
  9 30  1  0  0  0  0
 10 11  2  0  0  0  0
 10 16  1  0  0  0  0
 11 12  1  0  0  0  0
 11 31  1  0  0  0  0
 12 13  2  0  0  0  0
 12 32  1  0  0  0  0
 13 14  1  0  0  0  0
 13 15  1  0  0  0  0
 15 16  2  0  0  0  0
 15 33  1  0  0  0  0
 16 34  1  0  0  0  0
 17 24  1  0  0  0  0
 17 35  1  0  0  0  0
 18 19  1  0  0  0  0
 18 23  1  0  0  0  0
 19 20  1  0  0  0  0
 19 36  1  0  0  0  0
 19 37  1  0  0  0  0
 20 21  1  0  0  0  0
 20 22  1  0  0  0  0
 23 24  1  0  0  0  0
 23 38  1  0  0  0  0
 24 25  2  0  0  0  0
M  CHG  2  21  -1  22  -1
M  END
$$$$
RDT27
 OpenBabel09302314563D

 38 39  0  0  1  0  0  0  0  0999 V2000
   -1.9920   -2.0740    1.8170 O   0  0  0  0  0  0  0  0  0  0  0  0
   -2.2700   -1.6390    0.7220 C   0  0  0  0  0  0  0  0  0  0  0  0
   -2.2540   -2.4320   -0.3880 O   0  0  0  0  0  0  0  0  0  0  0  0
   -2.4450   -3.8180   -0.1250 C   0  0  0  0  0  0  0  0  0  0  0  0
   -2.4140   -0.2220    0.3810 C   0  0  0  0  0  0  0  0  0  0  0  0
   -1.6280    0.6790    1.2890 C   0  0  1  0  0  0  0  0  0  0  0  0
   -1.9340    0.4710    2.3630 H   0  0  0  0  0  0  0  0  0  0  0  0
   -0.1620    0.3580    1.1150 C   0  0  0  0  0  0  0  0  0  0  0  0
    0.6860    1.0460    0.3450 C   0  0  0  0  0  0  0  0  0  0  0  0
    2.0850    0.6570    0.1770 C   0  0  0  0  0  0  0  0  0  0  0  0
    3.0800    1.6410    0.1700 C   0  0  0  0  0  0  0  0  0  0  0  0
    4.4190    1.2880    0.0160 C   0  0  0  0  0  0  0  0  0  0  0  0
    4.7390   -0.0550   -0.1370 C   0  0  0  0  0  0  0  0  0  0  0  0
    6.5680   -0.5440   -0.3470 Br  0  0  0  0  0  0  0  0  0  0  0  0
    3.7720   -1.0520   -0.1460 C   0  0  0  0  0  0  0  0  0  0  0  0
    2.4370   -0.6880    0.0120 C   0  0  0  0  0  0  0  0  0  0  0  0
   -1.9030    2.1080    1.0350 N   0  0  0  0  0  0  0  0  0  0  0  0
   -3.2600    0.2460   -0.5720 C   0  0  0  0  0  0  0  0  0  0  0  0
   -4.1310   -0.5430   -1.4380 C   0  0  0  0  0  0  0  0  0  0  0  0
   -5.1620   -1.4260   -0.5180 C   0  0  0  0  0  3  0  0  0  0  0  0
   -6.2500   -1.5890   -1.0480 O   0  5  0  0  0  0  0  0  0  0  0  0
   -4.6800   -1.8080    0.5430 O   0  5  0  0  0  0  0  0  0  0  0  0
   -3.3580    1.6490   -0.7600 N   0  0  0  0  0  0  0  0  0  0  0  0
   -2.6800    2.5580    0.0200 C   0  0  0  0  0  0  0  0  0  0  0  0
   -2.8170    4.2290   -0.2880 S   0  0  0  0  0  0  0  0  0  0  0  0
   -2.5000   -4.2560   -1.1240 H   0  0  0  0  0  0  0  0  0  0  0  0
   -1.6080   -4.2120    0.4550 H   0  0  0  0  0  0  0  0  0  0  0  0
   -3.3920   -3.9540    0.4200 H   0  0  0  0  0  0  0  0  0  0  0  0
    0.1390   -0.5420    1.6610 H   0  0  0  0  0  0  0  0  0  0  0  0
    0.3810    1.9360   -0.2110 H   0  0  0  0  0  0  0  0  0  0  0  0
    2.8070    2.6890    0.2890 H   0  0  0  0  0  0  0  0  0  0  0  0
    5.1870    2.0590    0.0170 H   0  0  0  0  0  0  0  0  0  0  0  0
    4.0370   -2.1000   -0.2740 H   0  0  0  0  0  0  0  0  0  0  0  0
    1.6580   -1.4540    0.0000 H   0  0  0  0  0  0  0  0  0  0  0  0
   -1.3790    2.7720    1.5960 H   0  0  0  0  0  0  0  0  0  0  0  0
   -3.6030   -1.3090   -2.0250 H   0  0  0  0  0  0  0  0  0  0  0  0
   -4.7500    0.0280   -2.1400 H   0  0  0  0  0  0  0  0  0  0  0  0
   -4.0280    2.0000   -1.4480 H   0  0  0  0  0  0  0  0  0  0  0  0
  1  2  2  0  0  0  0
  2  3  1  0  0  0  0
  2  5  1  0  0  0  0
  3  4  1  0  0  0  0
  4 26  1  0  0  0  0
  4 27  1  0  0  0  0
  4 28  1  0  0  0  0
  5  6  1  0  0  0  0
  5 18  2  0  0  0  0
  6  7  1  1  0  0  0
  6  8  1  0  0  0  0
  6 17  1  0  0  0  0
  8  9  2  0  0  0  0
  8 29  1  0  0  0  0
  9 10  1  0  0  0  0
  9 30  1  0  0  0  0
 10 11  2  0  0  0  0
 10 16  1  0  0  0  0
 11 12  1  0  0  0  0
 11 31  1  0  0  0  0
 12 13  2  0  0  0  0
 12 32  1  0  0  0  0
 13 14  1  0  0  0  0
 13 15  1  0  0  0  0
 15 16  2  0  0  0  0
 15 33  1  0  0  0  0
 16 34  1  0  0  0  0
 17 24  1  0  0  0  0
 17 35  1  0  0  0  0
 18 19  1  0  0  0  0
 18 23  1  0  0  0  0
 19 20  1  0  0  0  0
 19 36  1  0  0  0  0
 19 37  1  0  0  0  0
 20 21  1  0  0  0  0
 20 22  1  0  0  0  0
 23 24  1  0  0  0  0
 23 38  1  0  0  0  0
 24 25  2  0  0  0  0
M  CHG  2  21  -1  22  -1
M  END
$$$$
RDT28
 OpenBabel09302314563D

 40 41  0  0  1  0  0  0  0  0999 V2000
    2.2120   -0.7220   -3.4770 O   0  0  0  0  0  0  0  0  0  0  0  0
    1.9310   -0.9630   -2.3260 C   0  0  0  0  0  0  0  0  0  0  0  0
    1.6830   -2.2800   -2.0730 O   0  0  0  0  0  0  0  0  0  0  0  0
    1.2930   -2.6990   -0.7740 C   0  0  0  0  0  0  0  0  0  0  0  0
    1.7760    0.0390   -1.2740 C   0  0  0  0  0  0  0  0  0  0  0  0
    0.6170    0.9720   -1.4810 C   0  0  1  0  0  0  0  0  0  0  0  0
    0.5240    1.2480   -2.5730 H   0  0  0  0  0  0  0  0  0  0  0  0
   -0.6200    0.2180   -1.0390 C   0  0  0  0  0  0  0  0  0  0  0  0
   -1.3450    0.5120    0.0410 C   0  0  0  0  0  0  0  0  0  0  0  0
   -2.4190   -0.3610    0.5190 C   0  0  0  0  0  0  0  0  0  0  0  0
   -3.7690   -0.1580    0.2090 C   0  0  0  0  0  0  0  0  0  0  0  0
   -4.1730    0.9590   -0.6270 N   0  0  0  0  0  0  0  0  0  0  0  0
   -3.3710    1.8500   -0.8490 O   0  0  0  0  0  1  0  0  0  0  0  0
   -5.3130    0.9620   -1.0750 O   0  0  0  0  0  1  0  0  0  0  0  0
   -4.7590   -1.0230    0.6960 C   0  0  0  0  0  0  0  0  0  0  0  0
   -4.3940   -2.0930    1.5020 C   0  0  0  0  0  0  0  0  0  0  0  0
   -3.0490   -2.3010    1.8230 C   0  0  0  0  0  0  0  0  0  0  0  0
   -2.0710   -1.4430    1.3370 C   0  0  0  0  0  0  0  0  0  0  0  0
    0.8060    2.2240   -0.7260 N   0  0  0  0  0  0  0  0  0  0  0  0
    2.6050    0.1760   -0.2040 C   0  0  0  0  0  0  0  0  0  0  0  0
    3.7130   -0.7290    0.1440 C   0  0  0  0  0  0  0  0  0  0  0  0
    3.4690   -1.2780    1.6320 C   0  0  0  0  0  3  0  0  0  0  0  0
    3.3080   -0.3690    2.4570 O   0  5  0  0  0  0  0  0  0  0  0  0
    3.4630   -2.4930    1.7530 O   0  5  0  0  0  0  0  0  0  0  0  0
    2.4380    1.2570    0.6730 N   0  0  0  0  0  0  0  0  0  0  0  0
    1.5790    2.2950    0.3970 C   0  0  0  0  0  0  0  0  0  0  0  0
    1.5220    3.6800    1.3720 S   0  0  0  0  0  0  0  0  0  0  0  0
    0.6490   -3.5620   -0.9700 H   0  0  0  0  0  0  0  0  0  0  0  0
    0.7580   -1.9290   -0.2120 H   0  0  0  0  0  0  0  0  0  0  0  0
    2.1980   -3.0080   -0.2270 H   0  0  0  0  0  0  0  0  0  0  0  0
   -0.8360   -0.6480   -1.6680 H   0  0  0  0  0  0  0  0  0  0  0  0
   -1.1710    1.3960    0.6650 H   0  0  0  0  0  0  0  0  0  0  0  0
   -5.8090   -0.8570    0.4440 H   0  0  0  0  0  0  0  0  0  0  0  0
   -5.1550   -2.7690    1.8840 H   0  0  0  0  0  0  0  0  0  0  0  0
   -2.7690   -3.1410    2.4600 H   0  0  0  0  0  0  0  0  0  0  0  0
   -1.0180   -1.6010    1.5950 H   0  0  0  0  0  0  0  0  0  0  0  0
    0.1960    2.9980   -0.9690 H   0  0  0  0  0  0  0  0  0  0  0  0
    4.6910   -0.2210    0.1770 H   0  0  0  0  0  0  0  0  0  0  0  0
    3.8210   -1.5820   -0.5430 H   0  0  0  0  0  0  0  0  0  0  0  0
    2.8900    1.1510    1.6420 H   0  0  0  0  0  0  0  0  0  0  0  0
  1  2  2  0  0  0  0
  2  3  1  0  0  0  0
  2  5  1  0  0  0  0
  3  4  1  0  0  0  0
  4 28  1  0  0  0  0
  4 29  1  0  0  0  0
  4 30  1  0  0  0  0
  5  6  1  0  0  0  0
  5 20  2  0  0  0  0
  6  7  1  6  0  0  0
  6  8  1  0  0  0  0
  6 19  1  0  0  0  0
  8  9  2  0  0  0  0
  8 31  1  0  0  0  0
  9 10  1  0  0  0  0
  9 32  1  0  0  0  0
 10 11  2  0  0  0  0
 10 18  1  0  0  0  0
 11 12  1  0  0  0  0
 11 15  1  0  0  0  0
 12 13  1  0  0  0  0
 12 14  1  0  0  0  0
 15 16  2  0  0  0  0
 15 33  1  0  0  0  0
 16 17  1  0  0  0  0
 16 34  1  0  0  0  0
 17 18  2  0  0  0  0
 17 35  1  0  0  0  0
 18 36  1  0  0  0  0
 19 26  1  0  0  0  0
 19 37  1  0  0  0  0
 20 21  1  0  0  0  0
 20 25  1  0  0  0  0
 21 22  1  0  0  0  0
 21 38  1  0  0  0  0
 21 39  1  0  0  0  0
 22 23  1  0  0  0  0
 22 24  1  0  0  0  0
 25 26  1  0  0  0  0
 25 40  1  0  0  0  0
 26 27  2  0  0  0  0
M  CHG  2  23  -1  24  -1
M  END
$$$$
RDT29
 OpenBabel09302314563D

 38 39  0  0  1  0  0  0  0  0999 V2000
   -1.3100   -3.3670   -0.7210 O   0  0  0  0  0  0  0  0  0  0  0  0
   -0.7400   -2.3400   -1.0030 C   0  0  0  0  0  0  0  0  0  0  0  0
    0.5180   -2.4000   -1.5700 O   0  0  0  0  0  0  0  0  0  0  0  0
    1.0610   -3.7020   -1.7120 C   0  0  0  0  0  0  0  0  0  0  0  0
   -1.1740   -0.9730   -0.8740 C   0  0  0  0  0  0  0  0  0  0  0  0
   -0.3510    0.0740   -1.5590 C   0  0  2  0  0  0  0  0  0  0  0  0
   -0.0380   -0.2820   -2.5850 H   0  0  0  0  0  0  0  0  0  0  0  0
    0.8820    0.3600   -0.7260 C   0  0  0  0  0  0  0  0  0  0  0  0
    0.5480    1.3860    0.8310 Br  0  0  0  0  0  0  0  0  0  0  0  0
    2.0980   -0.0960   -1.0230 C   0  0  0  0  0  0  0  0  0  0  0  0
    3.2890    0.0700   -0.1900 C   0  0  0  0  0  0  0  0  0  0  0  0
    4.3420    0.8760   -0.6290 C   0  0  0  0  0  0  0  0  0  0  0  0
    5.4830    1.0150    0.1590 C   0  0  0  0  0  0  0  0  0  0  0  0
    5.5760    0.3480    1.3790 C   0  0  0  0  0  0  0  0  0  0  0  0
    4.5250   -0.4580    1.8150 C   0  0  0  0  0  0  0  0  0  0  0  0
    3.3820   -0.5990    1.0330 C   0  0  0  0  0  0  0  0  0  0  0  0
   -1.1110    1.3220   -1.7560 N   0  0  0  0  0  0  0  0  0  0  0  0
   -2.2900   -0.6260   -0.1380 C   0  0  0  0  0  0  0  0  0  0  0  0
   -3.0540   -1.5630    0.7010 C   0  0  0  0  0  0  0  0  0  0  0  0
   -3.5930   -0.9420    2.0740 C   0  0  0  0  0  3  0  0  0  0  0  0
   -4.0820    0.1930    1.9610 O   0  5  0  0  0  0  0  0  0  0  0  0
   -3.4950   -1.6730    3.0460 O   0  5  0  0  0  0  0  0  0  0  0  0
   -2.7780    0.6710   -0.2150 N   0  0  0  0  0  0  0  0  0  0  0  0
   -2.2360    1.6290   -1.0490 C   0  0  0  0  0  0  0  0  0  0  0  0
   -2.9720    3.1340   -1.2770 S   0  0  0  0  0  0  0  0  0  0  0  0
    2.0500   -3.5180   -2.1420 H   0  0  0  0  0  0  0  0  0  0  0  0
    0.4370   -4.3010   -2.3830 H   0  0  0  0  0  0  0  0  0  0  0  0
    1.1350   -4.1870   -0.7320 H   0  0  0  0  0  0  0  0  0  0  0  0
    2.2700   -0.6790   -1.9360 H   0  0  0  0  0  0  0  0  0  0  0  0
    4.2650    1.4020   -1.5770 H   0  0  0  0  0  0  0  0  0  0  0  0
    6.2990    1.6490   -0.1770 H   0  0  0  0  0  0  0  0  0  0  0  0
    6.4650    0.4600    1.9920 H   0  0  0  0  0  0  0  0  0  0  0  0
    4.5950   -0.9730    2.7700 H   0  0  0  0  0  0  0  0  0  0  0  0
    2.5530   -1.2230    1.3730 H   0  0  0  0  0  0  0  0  0  0  0  0
   -0.6890    2.0200   -2.3580 H   0  0  0  0  0  0  0  0  0  0  0  0
   -2.4720   -2.4700    0.9640 H   0  0  0  0  0  0  0  0  0  0  0  0
   -3.9590   -1.9340    0.1870 H   0  0  0  0  0  0  0  0  0  0  0  0
   -3.5570    0.9500    0.4780 H   0  0  0  0  0  0  0  0  0  0  0  0
  1  2  2  0  0  0  0
  2  3  1  0  0  0  0
  2  5  1  0  0  0  0
  3  4  1  0  0  0  0
  4 26  1  0  0  0  0
  4 27  1  0  0  0  0
  4 28  1  0  0  0  0
  5  6  1  0  0  0  0
  5 18  2  0  0  0  0
  6  7  1  6  0  0  0
  6  8  1  0  0  0  0
  6 17  1  0  0  0  0
  8  9  1  0  0  0  0
  8 10  2  0  0  0  0
 10 11  1  0  0  0  0
 10 29  1  0  0  0  0
 11 12  2  0  0  0  0
 11 16  1  0  0  0  0
 12 13  1  0  0  0  0
 12 30  1  0  0  0  0
 13 14  2  0  0  0  0
 13 31  1  0  0  0  0
 14 15  1  0  0  0  0
 14 32  1  0  0  0  0
 15 16  2  0  0  0  0
 15 33  1  0  0  0  0
 16 34  1  0  0  0  0
 17 24  1  0  0  0  0
 17 35  1  0  0  0  0
 18 19  1  0  0  0  0
 18 23  1  0  0  0  0
 19 20  1  0  0  0  0
 19 36  1  0  0  0  0
 19 37  1  0  0  0  0
 20 21  1  0  0  0  0
 20 22  1  0  0  0  0
 23 24  1  0  0  0  0
 23 38  1  0  0  0  0
 24 25  2  0  0  0  0
M  CHG  2  21  -1  22  -1
M  END
$$$$
RDT30
 OpenBabel09302314563D

 41 42  0  0  1  0  0  0  0  0999 V2000
    1.2440   -3.0390   -1.3810 O   0  0  0  0  0  0  0  0  0  0  0  0
    0.6520   -1.9910   -1.2740 C   0  0  0  0  0  0  0  0  0  0  0  0
   -0.6860   -1.9300   -1.5980 O   0  0  0  0  0  0  0  0  0  0  0  0
   -1.2790   -3.1600   -1.9820 C   0  0  0  0  0  0  0  0  0  0  0  0
    1.1290   -0.6850   -0.8840 C   0  0  0  0  0  0  0  0  0  0  0  0
    0.2980    0.4830   -1.3270 C   0  0  1  0  0  0  0  0  0  0  0  0
   -0.0760    0.3130   -2.3780 H   0  0  0  0  0  0  0  0  0  0  0  0
   -0.8840    0.6520   -0.3720 C   0  0  0  0  0  0  0  0  0  0  0  0
   -0.5610    1.0330    1.0250 C   0  0  0  0  0  0  0  0  0  0  0  0
   -2.1200    0.4100   -0.8300 C   0  0  0  0  0  0  0  0  0  0  0  0
   -3.3300    0.4360   -0.0110 C   0  0  0  0  0  0  0  0  0  0  0  0
   -3.4860   -0.4780    1.0370 C   0  0  0  0  0  0  0  0  0  0  0  0
   -4.6510   -0.4710    1.7990 C   0  0  0  0  0  0  0  0  0  0  0  0
   -5.6640    0.4460    1.5220 C   0  0  0  0  0  0  0  0  0  0  0  0
   -5.5090    1.3580    0.4790 C   0  0  0  0  0  0  0  0  0  0  0  0
   -4.3470    1.3530   -0.2890 C   0  0  0  0  0  0  0  0  0  0  0  0
    2.2660   -0.4910   -0.1360 C   0  0  0  0  0  0  0  0  0  0  0  0
    3.0260   -1.5390    0.5610 C   0  0  0  0  0  0  0  0  0  0  0  0
    3.3370   -1.1340    2.0840 C   0  0  0  0  0  3  0  0  0  0  0  0
    3.0910   -1.9920    2.9140 O   0  5  0  0  0  0  0  0  0  0  0  0
    3.8110    0.0060    2.2040 O   0  5  0  0  0  0  0  0  0  0  0  0
    2.7840    0.7980   -0.0080 N   0  0  0  0  0  0  0  0  0  0  0  0
    2.2470    1.8880   -0.6600 C   0  0  0  0  0  0  0  0  0  0  0  0
    1.0960    1.7260   -1.3670 N   0  0  0  0  0  0  0  0  0  0  0  0
    3.0180    3.3980   -0.6520 S   0  0  0  0  0  0  0  0  0  0  0  0
   -2.3250   -2.8890   -2.1580 H   0  0  0  0  0  0  0  0  0  0  0  0
   -1.1890   -3.8910   -1.1700 H   0  0  0  0  0  0  0  0  0  0  0  0
   -0.8050   -3.5450   -2.8890 H   0  0  0  0  0  0  0  0  0  0  0  0
   -1.4510    1.1460    1.6570 H   0  0  0  0  0  0  0  0  0  0  0  0
   -0.0080    1.9840    1.0770 H   0  0  0  0  0  0  0  0  0  0  0  0
    0.0800    0.2700    1.5050 H   0  0  0  0  0  0  0  0  0  0  0  0
   -2.2970    0.1270   -1.8700 H   0  0  0  0  0  0  0  0  0  0  0  0
   -2.6890   -1.1930    1.2470 H   0  0  0  0  0  0  0  0  0  0  0  0
   -4.7700   -1.1810    2.6140 H   0  0  0  0  0  0  0  0  0  0  0  0
   -6.5700    0.4530    2.1190 H   0  0  0  0  0  0  0  0  0  0  0  0
   -6.2960    2.0760    0.2660 H   0  0  0  0  0  0  0  0  0  0  0  0
   -4.2240    2.0660   -1.1000 H   0  0  0  0  0  0  0  0  0  0  0  0
    4.0140   -1.7230    0.1070 H   0  0  0  0  0  0  0  0  0  0  0  0
    2.5120   -2.5170    0.5840 H   0  0  0  0  0  0  0  0  0  0  0  0
    3.5410    0.9450    0.7460 H   0  0  0  0  0  0  0  0  0  0  0  0
    0.6850    2.5140   -1.8530 H   0  0  0  0  0  0  0  0  0  0  0  0
  1  2  2  0  0  0  0
  2  3  1  0  0  0  0
  2  5  1  0  0  0  0
  3  4  1  0  0  0  0
  4 26  1  0  0  0  0
  4 27  1  0  0  0  0
  4 28  1  0  0  0  0
  5  6  1  0  0  0  0
  5 17  2  0  0  0  0
  6  7  1  6  0  0  0
  6  8  1  0  0  0  0
  6 24  1  0  0  0  0
  8  9  1  0  0  0  0
  8 10  2  0  0  0  0
  9 29  1  0  0  0  0
  9 30  1  0  0  0  0
  9 31  1  0  0  0  0
 10 11  1  0  0  0  0
 10 32  1  0  0  0  0
 11 12  2  0  0  0  0
 11 16  1  0  0  0  0
 12 13  1  0  0  0  0
 12 33  1  0  0  0  0
 13 14  2  0  0  0  0
 13 34  1  0  0  0  0
 14 15  1  0  0  0  0
 14 35  1  0  0  0  0
 15 16  2  0  0  0  0
 15 36  1  0  0  0  0
 16 37  1  0  0  0  0
 17 18  1  0  0  0  0
 17 22  1  0  0  0  0
 18 19  1  0  0  0  0
 18 38  1  0  0  0  0
 18 39  1  0  0  0  0
 19 20  1  0  0  0  0
 19 21  1  0  0  0  0
 22 23  1  0  0  0  0
 22 40  1  0  0  0  0
 23 24  1  0  0  0  0
 23 25  2  0  0  0  0
 24 41  1  0  0  0  0
M  CHG  2  20  -1  21  -1
M  END
$$$$
RDU01
 OpenBabel09302314563D

 34 35  0  0  1  0  0  0  0  0999 V2000
   -0.9240   -2.3510   -1.3810 O   0  0  0  0  0  0  0  0  0  0  0  0
   -0.0820   -1.7980   -0.7020 C   0  0  0  0  0  0  0  0  0  0  0  0
    0.7080   -2.5340    0.1380 O   0  0  0  0  0  0  0  0  0  0  0  0
    0.4850   -3.9360    0.1190 C   0  0  0  0  0  0  0  0  0  0  0  0
    0.1940   -0.3850   -0.6350 C   0  0  0  0  0  0  0  0  0  0  0  0
   -0.9260    0.4440   -1.2010 C   0  0  1  0  0  0  0  0  0  0  0  0
   -1.2430    0.0150   -2.1990 H   0  0  0  0  0  0  0  0  0  0  0  0
   -2.1010    0.4080   -0.2320 C   0  0  0  0  0  0  0  0  0  0  0  0
   -2.1120    1.1940    0.9200 C   0  0  0  0  0  0  0  0  0  0  0  0
   -3.1890    1.1240    1.8000 C   0  0  0  0  0  0  0  0  0  0  0  0
   -4.2540    0.2640    1.5370 C   0  0  0  0  0  0  0  0  0  0  0  0
   -4.2360   -0.5330    0.3930 C   0  0  0  0  0  0  0  0  0  0  0  0
   -3.1610   -0.4620   -0.4900 C   0  0  0  0  0  0  0  0  0  0  0  0
    1.3300    0.1940   -0.1050 C   0  0  0  0  0  0  0  0  0  0  0  0
    2.4320   -0.5940    0.4930 C   0  0  0  0  0  0  0  0  0  0  0  0
    3.8410    0.0950    0.7050 C   0  0  0  0  0  3  0  0  0  0  0  0
    3.8390    1.3300    0.8370 O   0  5  0  0  0  0  0  0  0  0  0  0
    4.7820   -0.6890    0.7500 O   0  5  0  0  0  0  0  0  0  0  0  0
    1.4450    1.5660   -0.0960 N   0  0  0  0  0  0  0  0  0  0  0  0
    0.5340    2.4120   -0.7490 C   0  0  0  0  0  0  0  0  0  0  0  0
   -0.5040    1.8280   -1.4690 N   0  0  0  0  0  0  0  0  0  0  0  0
    0.6780    3.6200   -0.7340 O   0  0  0  0  0  0  0  0  0  0  0  0
    1.2250   -4.3110    0.8340 H   0  0  0  0  0  0  0  0  0  0  0  0
    0.6580   -4.3360   -0.8840 H   0  0  0  0  0  0  0  0  0  0  0  0
   -0.5360   -4.1610    0.4420 H   0  0  0  0  0  0  0  0  0  0  0  0
   -1.2720    1.8540    1.1400 H   0  0  0  0  0  0  0  0  0  0  0  0
   -3.1950    1.7370    2.6980 H   0  0  0  0  0  0  0  0  0  0  0  0
   -5.0920    0.2090    2.2240 H   0  0  0  0  0  0  0  0  0  0  0  0
   -5.0560   -1.2160    0.1930 H   0  0  0  0  0  0  0  0  0  0  0  0
   -3.1330   -1.1090   -1.3690 H   0  0  0  0  0  0  0  0  0  0  0  0
    2.6290   -1.5110   -0.1050 H   0  0  0  0  0  0  0  0  0  0  0  0
    2.1410   -0.9630    1.4980 H   0  0  0  0  0  0  0  0  0  0  0  0
    2.3300    2.0130    0.2950 H   0  0  0  0  0  0  0  0  0  0  0  0
   -1.2220    2.4560   -1.8060 H   0  0  0  0  0  0  0  0  0  0  0  0
  1  2  2  0  0  0  0
  2  3  1  0  0  0  0
  2  5  1  0  0  0  0
  3  4  1  0  0  0  0
  4 23  1  0  0  0  0
  4 24  1  0  0  0  0
  4 25  1  0  0  0  0
  5  6  1  0  0  0  0
  5 14  2  0  0  0  0
  6  7  1  6  0  0  0
  6  8  1  0  0  0  0
  6 21  1  0  0  0  0
  8  9  2  0  0  0  0
  8 13  1  0  0  0  0
  9 10  1  0  0  0  0
  9 26  1  0  0  0  0
 10 11  2  0  0  0  0
 10 27  1  0  0  0  0
 11 12  1  0  0  0  0
 11 28  1  0  0  0  0
 12 13  2  0  0  0  0
 12 29  1  0  0  0  0
 13 30  1  0  0  0  0
 14 15  1  0  0  0  0
 14 19  1  0  0  0  0
 15 16  1  0  0  0  0
 15 31  1  0  0  0  0
 15 32  1  0  0  0  0
 16 17  1  0  0  0  0
 16 18  1  0  0  0  0
 19 20  1  0  0  0  0
 19 33  1  0  0  0  0
 20 21  1  0  0  0  0
 20 22  2  0  0  0  0
 21 34  1  0  0  0  0
M  CHG  2  17  -1  18  -1
M  END
$$$$
RDU02
 OpenBabel09302314563D

 35 36  0  0  1  0  0  0  0  0999 V2000
    0.1500   -2.2280    1.5810 O   0  0  0  0  0  0  0  0  0  0  0  0
    0.1110   -1.7830    0.4680 C   0  0  0  0  0  0  0  0  0  0  0  0
   -0.3850   -2.6700   -0.5080 O   0  0  0  0  0  0  0  0  0  0  0  0
    0.4670   -2.8630   -1.6230 C   0  0  0  0  0  0  0  0  0  0  0  0
    0.3960   -0.4480   -0.0080 C   0  0  0  0  0  0  0  0  0  0  0  0
   -0.6430    0.1610   -0.9020 C   0  0  1  0  0  0  0  0  0  0  0  0
   -0.8720   -0.5370   -1.7650 H   0  0  0  0  0  0  0  0  0  0  0  0
   -1.9180    0.4250   -0.1210 C   0  0  0  0  0  0  0  0  0  0  0  0
   -3.0020   -0.4590   -0.1970 C   0  0  0  0  0  0  0  0  0  0  0  0
   -2.9640   -1.5990   -0.9310 O   0  0  0  0  0  0  0  0  0  0  0  0
   -4.2170   -0.1970    0.4460 C   0  0  0  0  0  0  0  0  0  0  0  0
   -4.3290    0.9550    1.2160 C   0  0  0  0  0  0  0  0  0  0  0  0
   -3.2440    1.8230    1.3470 C   0  0  0  0  0  0  0  0  0  0  0  0
   -2.0480    1.5540    0.6840 C   0  0  0  0  0  0  0  0  0  0  0  0
    1.5190    0.2420    0.3780 C   0  0  0  0  0  0  0  0  0  0  0  0
    2.5810   -0.3090    1.2430 C   0  0  0  0  0  0  0  0  0  0  0  0
    4.0300   -0.0420    0.6230 C   0  0  0  0  0  3  0  0  0  0  0  0
    4.2210    1.1440    0.3090 O   0  5  0  0  0  0  0  0  0  0  0  0
    4.7630   -1.0160    0.5540 O   0  5  0  0  0  0  0  0  0  0  0  0
    1.7060    1.5500   -0.0340 N   0  0  0  0  0  0  0  0  0  0  0  0
    0.8650    2.1600   -0.9770 C   0  0  0  0  0  0  0  0  0  0  0  0
   -0.1590    1.3990   -1.5400 N   0  0  0  0  0  0  0  0  0  0  0  0
    1.0430    3.3100   -1.3330 O   0  0  0  0  0  0  0  0  0  0  0  0
    1.2930   -3.5150   -1.3130 H   0  0  0  0  0  0  0  0  0  0  0  0
    0.8560   -1.9150   -2.0150 H   0  0  0  0  0  0  0  0  0  0  0  0
   -0.1690   -3.3640   -2.3590 H   0  0  0  0  0  0  0  0  0  0  0  0
   -2.0620   -2.0380   -0.8830 H   0  0  0  0  0  0  0  0  0  0  0  0
   -5.0380   -0.8980    0.3460 H   0  0  0  0  0  0  0  0  0  0  0  0
   -5.2630    1.1740    1.7270 H   0  0  0  0  0  0  0  0  0  0  0  0
   -3.3300    2.7070    1.9700 H   0  0  0  0  0  0  0  0  0  0  0  0
   -1.2020    2.2370    0.7980 H   0  0  0  0  0  0  0  0  0  0  0  0
    2.4820   -1.3920    1.4270 H   0  0  0  0  0  0  0  0  0  0  0  0
    2.5980    0.1710    2.2370 H   0  0  0  0  0  0  0  0  0  0  0  0
    2.6780    1.9750    0.1020 H   0  0  0  0  0  0  0  0  0  0  0  0
   -0.8490    1.9150   -2.0740 H   0  0  0  0  0  0  0  0  0  0  0  0
  1  2  2  0  0  0  0
  2  3  1  0  0  0  0
  2  5  1  0  0  0  0
  3  4  1  0  0  0  0
  4 24  1  0  0  0  0
  4 25  1  0  0  0  0
  4 26  1  0  0  0  0
  5  6  1  0  0  0  0
  5 15  2  0  0  0  0
  6  7  1  6  0  0  0
  6  8  1  0  0  0  0
  6 22  1  0  0  0  0
  8  9  2  0  0  0  0
  8 14  1  0  0  0  0
  9 10  1  0  0  0  0
  9 11  1  0  0  0  0
 10 27  1  0  0  0  0
 11 12  2  0  0  0  0
 11 28  1  0  0  0  0
 12 13  1  0  0  0  0
 12 29  1  0  0  0  0
 13 14  2  0  0  0  0
 13 30  1  0  0  0  0
 14 31  1  0  0  0  0
 15 16  1  0  0  0  0
 15 20  1  0  0  0  0
 16 17  1  0  0  0  0
 16 32  1  0  0  0  0
 16 33  1  0  0  0  0
 17 18  1  0  0  0  0
 17 19  1  0  0  0  0
 20 21  1  0  0  0  0
 20 34  1  0  0  0  0
 21 22  1  0  0  0  0
 21 23  2  0  0  0  0
 22 35  1  0  0  0  0
M  CHG  2  18  -1  19  -1
M  END
$$$$
RDU03
 OpenBabel09302314563D

 35 36  0  0  1  0  0  0  0  0999 V2000
    0.4970   -1.8480    2.4300 O   0  0  0  0  0  0  0  0  0  0  0  0
    0.0670   -1.5340    1.3410 C   0  0  0  0  0  0  0  0  0  0  0  0
    0.2000   -2.4990    0.3870 O   0  0  0  0  0  0  0  0  0  0  0  0
   -0.0380   -2.1660   -0.9740 C   0  0  0  0  0  0  0  0  0  0  0  0
   -0.4850   -0.2250    1.0040 C   0  0  0  0  0  0  0  0  0  0  0  0
    0.4790    0.9000    1.2430 C   0  0  1  0  0  0  0  0  0  0  0  0
    0.9050    0.8060    2.2890 H   0  0  0  0  0  0  0  0  0  0  0  0
    1.6100    0.7850    0.2270 C   0  0  0  0  0  0  0  0  0  0  0  0
    2.6810   -0.0520    0.5420 C   0  0  0  0  0  0  0  0  0  0  0  0
    3.7000   -0.2030   -0.3960 C   0  0  0  0  0  0  0  0  0  0  0  0
    4.7740   -1.0080   -0.1660 O   0  0  0  0  0  0  0  0  0  0  0  0
    3.6950    0.4610   -1.6260 C   0  0  0  0  0  0  0  0  0  0  0  0
    2.6130    1.2860   -1.9160 C   0  0  0  0  0  0  0  0  0  0  0  0
    1.5730    1.4460   -0.9990 C   0  0  0  0  0  0  0  0  0  0  0  0
   -1.7650   -0.0080    0.5860 C   0  0  0  0  0  0  0  0  0  0  0  0
   -2.7890   -1.0600    0.4140 C   0  0  0  0  0  0  0  0  0  0  0  0
   -3.4730   -0.9430   -1.0260 C   0  0  0  0  0  3  0  0  0  0  0  0
   -3.4920   -1.9720   -1.6850 O   0  5  0  0  0  0  0  0  0  0  0  0
   -3.9030    0.1930   -1.2750 O   0  5  0  0  0  0  0  0  0  0  0  0
   -2.2040    1.2840    0.3210 N   0  0  0  0  0  0  0  0  0  0  0  0
   -1.3870    2.3990    0.5150 C   0  0  0  0  0  0  0  0  0  0  0  0
   -0.1780    2.2140    1.1900 N   0  0  0  0  0  0  0  0  0  0  0  0
   -1.7440    3.5190    0.1970 O   0  0  0  0  0  0  0  0  0  0  0  0
   -1.1080   -2.3000   -1.1980 H   0  0  0  0  0  0  0  0  0  0  0  0
    0.5620   -2.9050   -1.5150 H   0  0  0  0  0  0  0  0  0  0  0  0
    0.2870   -1.1500   -1.2180 H   0  0  0  0  0  0  0  0  0  0  0  0
    2.7010   -0.5980    1.4820 H   0  0  0  0  0  0  0  0  0  0  0  0
    4.6640   -1.5360    0.6610 H   0  0  0  0  0  0  0  0  0  0  0  0
    4.5090    0.3190   -2.3260 H   0  0  0  0  0  0  0  0  0  0  0  0
    2.5730    1.8050   -2.8720 H   0  0  0  0  0  0  0  0  0  0  0  0
    0.7220    2.0770   -1.2570 H   0  0  0  0  0  0  0  0  0  0  0  0
   -3.6160   -0.9510    1.1370 H   0  0  0  0  0  0  0  0  0  0  0  0
   -2.3930   -2.0800    0.5400 H   0  0  0  0  0  0  0  0  0  0  0  0
   -3.0960    1.3930   -0.2520 H   0  0  0  0  0  0  0  0  0  0  0  0
    0.4290    3.0210    1.2410 H   0  0  0  0  0  0  0  0  0  0  0  0
  1  2  2  0  0  0  0
  2  3  1  0  0  0  0
  2  5  1  0  0  0  0
  3  4  1  0  0  0  0
  4 24  1  0  0  0  0
  4 25  1  0  0  0  0
  4 26  1  0  0  0  0
  5  6  1  0  0  0  0
  5 15  2  0  0  0  0
  6  7  1  1  0  0  0
  6  8  1  0  0  0  0
  6 22  1  0  0  0  0
  8  9  2  0  0  0  0
  8 14  1  0  0  0  0
  9 10  1  0  0  0  0
  9 27  1  0  0  0  0
 10 11  1  0  0  0  0
 10 12  2  0  0  0  0
 11 28  1  0  0  0  0
 12 13  1  0  0  0  0
 12 29  1  0  0  0  0
 13 14  2  0  0  0  0
 13 30  1  0  0  0  0
 14 31  1  0  0  0  0
 15 16  1  0  0  0  0
 15 20  1  0  0  0  0
 16 17  1  0  0  0  0
 16 32  1  0  0  0  0
 16 33  1  0  0  0  0
 17 18  1  0  0  0  0
 17 19  1  0  0  0  0
 20 21  1  0  0  0  0
 20 34  1  0  0  0  0
 21 22  1  0  0  0  0
 21 23  2  0  0  0  0
 22 35  1  0  0  0  0
M  CHG  2  18  -1  19  -1
M  END
$$$$
RDU04
 OpenBabel09302314563D

 35 36  0  0  1  0  0  0  0  0999 V2000
    0.5350    2.4930   -1.3960 O   0  0  0  0  0  0  0  0  0  0  0  0
   -0.3480    1.8850   -0.8210 C   0  0  0  0  0  0  0  0  0  0  0  0
   -1.2960    2.5760   -0.1180 O   0  0  0  0  0  0  0  0  0  0  0  0
   -1.1390    3.9870   -0.0930 C   0  0  0  0  0  0  0  0  0  0  0  0
   -0.5380    0.4600   -0.7880 C   0  0  0  0  0  0  0  0  0  0  0  0
    0.5920   -0.2810   -1.4510 C   0  0  1  0  0  0  0  0  0  0  0  0
    0.8710    0.2420   -2.4150 H   0  0  0  0  0  0  0  0  0  0  0  0
    1.7940   -0.2980   -0.5170 C   0  0  0  0  0  0  0  0  0  0  0  0
    2.8320    0.6060   -0.7450 C   0  0  0  0  0  0  0  0  0  0  0  0
    3.9400    0.6360    0.0990 C   0  0  0  0  0  0  0  0  0  0  0  0
    3.9710   -0.2530    1.1730 C   0  0  0  0  0  0  0  0  0  0  0  0
    5.0240   -0.2980    2.0400 O   0  0  0  0  0  0  0  0  0  0  0  0
    2.9370   -1.1550    1.4360 C   0  0  0  0  0  0  0  0  0  0  0  0
    1.8420   -1.1620    0.5800 C   0  0  0  0  0  0  0  0  0  0  0  0
   -1.6040   -0.2130   -0.2190 C   0  0  0  0  0  0  0  0  0  0  0  0
   -2.6770    0.4790    0.5320 C   0  0  0  0  0  0  0  0  0  0  0  0
   -3.7640   -0.3550    1.3260 C   0  0  0  0  0  3  0  0  0  0  0  0
   -3.7470   -1.5880    1.1890 O   0  5  0  0  0  0  0  0  0  0  0  0
   -4.5240    0.3410    1.9920 O   0  5  0  0  0  0  0  0  0  0  0  0
   -1.6880   -1.5780   -0.3590 N   0  0  0  0  0  0  0  0  0  0  0  0
   -0.7960   -2.3270   -1.1440 C   0  0  0  0  0  0  0  0  0  0  0  0
    0.2010   -1.6480   -1.8330 N   0  0  0  0  0  0  0  0  0  0  0  0
   -0.9300   -3.5310   -1.2660 O   0  0  0  0  0  0  0  0  0  0  0  0
   -1.9830    4.3140    0.5230 H   0  0  0  0  0  0  0  0  0  0  0  0
   -0.1810    4.2540    0.3630 H   0  0  0  0  0  0  0  0  0  0  0  0
   -1.1990    4.3940   -1.1060 H   0  0  0  0  0  0  0  0  0  0  0  0
    2.7650    1.3130   -1.5750 H   0  0  0  0  0  0  0  0  0  0  0  0
    4.7440    1.3390   -0.0700 H   0  0  0  0  0  0  0  0  0  0  0  0
    5.6970    0.3880    1.8360 H   0  0  0  0  0  0  0  0  0  0  0  0
    2.9950   -1.8180    2.2930 H   0  0  0  0  0  0  0  0  0  0  0  0
    1.0090   -1.8410    0.7770 H   0  0  0  0  0  0  0  0  0  0  0  0
   -2.2370    1.1680    1.2880 H   0  0  0  0  0  0  0  0  0  0  0  0
   -3.2620    1.1320   -0.1480 H   0  0  0  0  0  0  0  0  0  0  0  0
   -2.4830   -2.1080    0.1120 H   0  0  0  0  0  0  0  0  0  0  0  0
    0.9110   -2.2140   -2.2760 H   0  0  0  0  0  0  0  0  0  0  0  0
  1  2  2  0  0  0  0
  2  3  1  0  0  0  0
  2  5  1  0  0  0  0
  3  4  1  0  0  0  0
  4 24  1  0  0  0  0
  4 25  1  0  0  0  0
  4 26  1  0  0  0  0
  5  6  1  0  0  0  0
  5 15  2  0  0  0  0
  6  7  1  6  0  0  0
  6  8  1  0  0  0  0
  6 22  1  0  0  0  0
  8  9  2  0  0  0  0
  8 14  1  0  0  0  0
  9 10  1  0  0  0  0
  9 27  1  0  0  0  0
 10 11  2  0  0  0  0
 10 28  1  0  0  0  0
 11 12  1  0  0  0  0
 11 13  1  0  0  0  0
 12 29  1  0  0  0  0
 13 14  2  0  0  0  0
 13 30  1  0  0  0  0
 14 31  1  0  0  0  0
 15 16  1  0  0  0  0
 15 20  1  0  0  0  0
 16 17  1  0  0  0  0
 16 32  1  0  0  0  0
 16 33  1  0  0  0  0
 17 18  1  0  0  0  0
 17 19  1  0  0  0  0
 20 21  1  0  0  0  0
 20 34  1  0  0  0  0
 21 22  1  0  0  0  0
 21 23  2  0  0  0  0
 22 35  1  0  0  0  0
M  CHG  2  18  -1  19  -1
M  END
$$$$
RDU05
 OpenBabel09302314563D

 36 37  0  0  1  0  0  0  0  0999 V2000
    0.6190   -3.0090   -0.8980 O   0  0  0  0  0  0  0  0  0  0  0  0
    1.2510   -2.0560   -0.4910 C   0  0  0  0  0  0  0  0  0  0  0  0
    2.3740   -2.2600    0.2730 O   0  0  0  0  0  0  0  0  0  0  0  0
    2.6390   -3.6090    0.6230 C   0  0  0  0  0  0  0  0  0  0  0  0
    1.0150   -0.6640   -0.7460 C   0  0  0  0  0  0  0  0  0  0  0  0
   -0.1170   -0.3900   -1.7050 C   0  0  1  0  0  0  0  0  0  0  0  0
   -0.1960   -1.2230   -2.4630 H   0  0  0  0  0  0  0  0  0  0  0  0
   -1.3880   -0.3190   -0.8830 C   0  0  0  0  0  0  0  0  0  0  0  0
   -1.6450    0.7510   -0.0020 C   0  0  0  0  0  0  0  0  0  0  0  0
   -0.8790    1.8380   -0.0690 O   0  0  0  0  0  0  0  0  0  0  0  0
   -2.7440    0.7330    0.8670 C   0  0  0  0  0  0  0  0  0  0  0  0
   -3.5900   -0.3700    0.8070 C   0  0  0  0  0  0  0  0  0  0  0  0
   -4.6930   -0.4670    1.6030 O   0  0  0  0  0  0  0  0  0  0  0  0
   -3.3800   -1.4430   -0.0630 C   0  0  0  0  0  0  0  0  0  0  0  0
   -2.2610   -1.4030   -0.8930 C   0  0  0  0  0  0  0  0  0  0  0  0
    1.6350    0.4020   -0.1410 C   0  0  0  0  0  0  0  0  0  0  0  0
    2.3300    0.3650    1.1700 C   0  0  0  0  0  0  0  0  0  0  0  0
    1.6720    1.3850    2.1690 C   0  0  0  0  0  3  0  0  0  0  0  0
    1.8980    1.2240    3.3530 O   0  5  0  0  0  0  0  0  0  0  0  0
    1.0040    2.3040    1.6160 O   0  5  0  0  0  0  0  0  0  0  0  0
    1.6000    1.6530   -0.7320 N   0  0  0  0  0  0  0  0  0  0  0  0
    0.8260    1.9020   -1.9020 C   0  0  0  0  0  0  0  0  0  0  0  0
    0.1430    0.8360   -2.4850 N   0  0  0  0  0  0  0  0  0  0  0  0
    0.8780    2.9910   -2.4390 O   0  0  0  0  0  0  0  0  0  0  0  0
    3.5330   -3.5340    1.2500 H   0  0  0  0  0  0  0  0  0  0  0  0
    2.8280   -4.2030   -0.2750 H   0  0  0  0  0  0  0  0  0  0  0  0
    1.7930   -4.0280    1.1800 H   0  0  0  0  0  0  0  0  0  0  0  0
   -0.2400    2.0180    0.7690 H   0  0  0  0  0  0  0  0  0  0  0  0
   -2.9070    1.5580    1.5460 H   0  0  0  0  0  0  0  0  0  0  0  0
   -4.7580    0.2920    2.2270 H   0  0  0  0  0  0  0  0  0  0  0  0
   -4.0580   -2.2840   -0.0690 H   0  0  0  0  0  0  0  0  0  0  0  0
   -2.0480   -2.2570   -1.5410 H   0  0  0  0  0  0  0  0  0  0  0  0
    3.4000    0.6230    1.0960 H   0  0  0  0  0  0  0  0  0  0  0  0
    2.2970   -0.6350    1.6480 H   0  0  0  0  0  0  0  0  0  0  0  0
    1.6870    2.4800   -0.0770 H   0  0  0  0  0  0  0  0  0  0  0  0
   -0.5880    1.1010   -3.1350 H   0  0  0  0  0  0  0  0  0  0  0  0
  1  2  2  0  0  0  0
  2  3  1  0  0  0  0
  2  5  1  0  0  0  0
  3  4  1  0  0  0  0
  4 25  1  0  0  0  0
  4 26  1  0  0  0  0
  4 27  1  0  0  0  0
  5  6  1  0  0  0  0
  5 16  2  0  0  0  0
  6  7  1  6  0  0  0
  6  8  1  0  0  0  0
  6 23  1  0  0  0  0
  8  9  2  0  0  0  0
  8 15  1  0  0  0  0
  9 10  1  0  0  0  0
  9 11  1  0  0  0  0
 10 28  1  0  0  0  0
 11 12  2  0  0  0  0
 11 29  1  0  0  0  0
 12 13  1  0  0  0  0
 12 14  1  0  0  0  0
 13 30  1  0  0  0  0
 14 15  2  0  0  0  0
 14 31  1  0  0  0  0
 15 32  1  0  0  0  0
 16 17  1  0  0  0  0
 16 21  1  0  0  0  0
 17 18  1  0  0  0  0
 17 33  1  0  0  0  0
 17 34  1  0  0  0  0
 18 19  1  0  0  0  0
 18 20  1  0  0  0  0
 21 22  1  0  0  0  0
 21 35  1  0  0  0  0
 22 23  1  0  0  0  0
 22 24  2  0  0  0  0
 23 36  1  0  0  0  0
M  CHG  2  19  -1  20  -1
M  END
$$$$
RDU06
 OpenBabel09302314563D

 36 37  0  0  1  0  0  0  0  0999 V2000
   -0.4680   -2.4450   -1.3470 O   0  0  0  0  0  0  0  0  0  0  0  0
    0.4700   -1.8840   -0.8120 C   0  0  0  0  0  0  0  0  0  0  0  0
    1.4120   -2.6240   -0.1530 O   0  0  0  0  0  0  0  0  0  0  0  0
    1.1780   -4.0240   -0.1110 C   0  0  0  0  0  0  0  0  0  0  0  0
    0.7430   -0.4720   -0.7960 C   0  0  0  0  0  0  0  0  0  0  0  0
   -0.3270    0.3330   -1.4810 C   0  0  1  0  0  0  0  0  0  0  0  0
   -0.6590   -0.2000   -2.4220 H   0  0  0  0  0  0  0  0  0  0  0  0
   -1.5150    0.4810   -0.5390 C   0  0  0  0  0  0  0  0  0  0  0  0
   -2.5890   -0.3980   -0.6930 C   0  0  0  0  0  0  0  0  0  0  0  0
   -3.6650   -0.3020    0.1790 C   0  0  0  0  0  0  0  0  0  0  0  0
   -4.7620   -1.1170    0.1060 O   0  0  0  0  0  0  0  0  0  0  0  0
   -3.6880    0.6680    1.1940 C   0  0  0  0  0  0  0  0  0  0  0  0
   -4.7310    0.8100    2.0560 O   0  0  0  0  0  0  0  0  0  0  0  0
   -2.6110    1.5380    1.3490 C   0  0  0  0  0  0  0  0  0  0  0  0
   -1.5240    1.4310    0.4820 C   0  0  0  0  0  0  0  0  0  0  0  0
    1.8440    0.1410   -0.2250 C   0  0  0  0  0  0  0  0  0  0  0  0
    2.8480   -0.5960    0.5760 C   0  0  0  0  0  0  0  0  0  0  0  0
    3.9150    0.1980    1.4380 C   0  0  0  0  0  3  0  0  0  0  0  0
    4.0120    1.4180    1.2330 O   0  5  0  0  0  0  0  0  0  0  0  0
    4.5480   -0.5120    2.2110 O   0  5  0  0  0  0  0  0  0  0  0  0
    2.0360    1.4890   -0.4160 N   0  0  0  0  0  0  0  0  0  0  0  0
    1.2160    2.2730   -1.2440 C   0  0  0  0  0  0  0  0  0  0  0  0
    0.1740    1.6460   -1.9160 N   0  0  0  0  0  0  0  0  0  0  0  0
    1.4490    3.4550   -1.4170 O   0  0  0  0  0  0  0  0  0  0  0  0
    2.0300   -4.3960    0.4700 H   0  0  0  0  0  0  0  0  0  0  0  0
    1.1680   -4.4390   -1.1230 H   0  0  0  0  0  0  0  0  0  0  0  0
    0.2280   -4.2350    0.3900 H   0  0  0  0  0  0  0  0  0  0  0  0
   -2.5680   -1.1680   -1.4640 H   0  0  0  0  0  0  0  0  0  0  0  0
   -4.5870   -1.8870   -0.4850 H   0  0  0  0  0  0  0  0  0  0  0  0
   -5.4150    0.1120    1.8970 H   0  0  0  0  0  0  0  0  0  0  0  0
   -2.6250    2.2760    2.1470 H   0  0  0  0  0  0  0  0  0  0  0  0
   -0.6670    2.0950    0.6190 H   0  0  0  0  0  0  0  0  0  0  0  0
    3.4510   -1.2590   -0.0780 H   0  0  0  0  0  0  0  0  0  0  0  0
    2.3440   -1.2780    1.2970 H   0  0  0  0  0  0  0  0  0  0  0  0
    2.8520    1.9790    0.0630 H   0  0  0  0  0  0  0  0  0  0  0  0
   -0.4810    2.2460   -2.3980 H   0  0  0  0  0  0  0  0  0  0  0  0
  1  2  2  0  0  0  0
  2  3  1  0  0  0  0
  2  5  1  0  0  0  0
  3  4  1  0  0  0  0
  4 25  1  0  0  0  0
  4 26  1  0  0  0  0
  4 27  1  0  0  0  0
  5  6  1  0  0  0  0
  5 16  2  0  0  0  0
  6  7  1  6  0  0  0
  6  8  1  0  0  0  0
  6 23  1  0  0  0  0
  8  9  2  0  0  0  0
  8 15  1  0  0  0  0
  9 10  1  0  0  0  0
  9 28  1  0  0  0  0
 10 11  1  0  0  0  0
 10 12  2  0  0  0  0
 11 29  1  0  0  0  0
 12 13  1  0  0  0  0
 12 14  1  0  0  0  0
 13 30  1  0  0  0  0
 14 15  2  0  0  0  0
 14 31  1  0  0  0  0
 15 32  1  0  0  0  0
 16 17  1  0  0  0  0
 16 21  1  0  0  0  0
 17 18  1  0  0  0  0
 17 33  1  0  0  0  0
 17 34  1  0  0  0  0
 18 19  1  0  0  0  0
 18 20  1  0  0  0  0
 21 22  1  0  0  0  0
 21 35  1  0  0  0  0
 22 23  1  0  0  0  0
 22 24  2  0  0  0  0
 23 36  1  0  0  0  0
M  CHG  2  19  -1  20  -1
M  END
$$$$
RDU07
 OpenBabel09302314563D

 39 40  0  0  1  0  0  0  0  0999 V2000
   -0.5770   -2.1960   -1.3830 O   0  0  0  0  0  0  0  0  0  0  0  0
    0.4360   -1.7770   -0.8530 C   0  0  0  0  0  0  0  0  0  0  0  0
    1.2740   -2.6540   -0.2210 O   0  0  0  0  0  0  0  0  0  0  0  0
    0.8490   -4.0080   -0.2010 C   0  0  0  0  0  0  0  0  0  0  0  0
    0.8990   -0.4170   -0.8140 C   0  0  0  0  0  0  0  0  0  0  0  0
   -0.0520    0.5380   -1.4840 C   0  0  1  0  0  0  0  0  0  0  0  0
   -0.4310    0.0810   -2.4470 H   0  0  0  0  0  0  0  0  0  0  0  0
   -1.2260    0.7960   -0.5500 C   0  0  0  0  0  0  0  0  0  0  0  0
   -2.3950    0.0630   -0.7520 C   0  0  0  0  0  0  0  0  0  0  0  0
   -3.4520    0.2170    0.1350 C   0  0  0  0  0  0  0  0  0  0  0  0
   -4.6520   -0.4400   -0.0150 O   0  0  0  0  0  0  0  0  0  0  0  0
   -4.5120   -1.8570    0.0730 C   0  0  0  0  0  0  0  0  0  0  0  0
   -3.3580    1.1240    1.2010 C   0  0  0  0  0  0  0  0  0  0  0  0
   -4.3800    1.3200    2.0770 O   0  0  0  0  0  0  0  0  0  0  0  0
   -2.1950    1.8670    1.3980 C   0  0  0  0  0  0  0  0  0  0  0  0
   -1.1270    1.6840    0.5230 C   0  0  0  0  0  0  0  0  0  0  0  0
    2.0690    0.0310   -0.2270 C   0  0  0  0  0  0  0  0  0  0  0  0
    2.9660   -0.8540    0.5510 C   0  0  0  0  0  0  0  0  0  0  0  0
    4.1280   -0.2330    1.4310 C   0  0  0  0  0  3  0  0  0  0  0  0
    4.3900    0.9660    1.2560 O   0  5  0  0  0  0  0  0  0  0  0  0
    4.6580   -1.0420    2.1860 O   0  5  0  0  0  0  0  0  0  0  0  0
    2.4350    1.3470   -0.3770 N   0  0  0  0  0  0  0  0  0  0  0  0
    1.7220    2.2580   -1.1740 C   0  0  0  0  0  0  0  0  0  0  0  0
    0.6120    1.7940   -1.8670 N   0  0  0  0  0  0  0  0  0  0  0  0
    2.1050    3.4070   -1.3030 O   0  0  0  0  0  0  0  0  0  0  0  0
    1.6480   -4.5060    0.3600 H   0  0  0  0  0  0  0  0  0  0  0  0
    0.7700   -4.3970   -1.2200 H   0  0  0  0  0  0  0  0  0  0  0  0
   -0.1150   -4.0960    0.3100 H   0  0  0  0  0  0  0  0  0  0  0  0
   -2.4750   -0.6480   -1.5770 H   0  0  0  0  0  0  0  0  0  0  0  0
   -5.5310   -2.2160   -0.0980 H   0  0  0  0  0  0  0  0  0  0  0  0
   -4.1490   -2.1400    1.0660 H   0  0  0  0  0  0  0  0  0  0  0  0
   -3.8320   -2.2320   -0.7020 H   0  0  0  0  0  0  0  0  0  0  0  0
   -5.1460    0.7300    1.8550 H   0  0  0  0  0  0  0  0  0  0  0  0
   -2.1300    2.5600    2.2330 H   0  0  0  0  0  0  0  0  0  0  0  0
   -0.1980    2.2330    0.6910 H   0  0  0  0  0  0  0  0  0  0  0  0
    3.4760   -1.5740   -0.1210 H   0  0  0  0  0  0  0  0  0  0  0  0
    2.3750   -1.4820    1.2550 H   0  0  0  0  0  0  0  0  0  0  0  0
    3.3090    1.7100    0.1130 H   0  0  0  0  0  0  0  0  0  0  0  0
    0.0380    2.4900   -2.3220 H   0  0  0  0  0  0  0  0  0  0  0  0
  1  2  2  0  0  0  0
  2  3  1  0  0  0  0
  2  5  1  0  0  0  0
  3  4  1  0  0  0  0
  4 26  1  0  0  0  0
  4 27  1  0  0  0  0
  4 28  1  0  0  0  0
  5  6  1  0  0  0  0
  5 17  2  0  0  0  0
  6  7  1  6  0  0  0
  6  8  1  0  0  0  0
  6 24  1  0  0  0  0
  8  9  2  0  0  0  0
  8 16  1  0  0  0  0
  9 10  1  0  0  0  0
  9 29  1  0  0  0  0
 10 11  1  0  0  0  0
 10 13  2  0  0  0  0
 11 12  1  0  0  0  0
 12 30  1  0  0  0  0
 12 31  1  0  0  0  0
 12 32  1  0  0  0  0
 13 14  1  0  0  0  0
 13 15  1  0  0  0  0
 14 33  1  0  0  0  0
 15 16  2  0  0  0  0
 15 34  1  0  0  0  0
 16 35  1  0  0  0  0
 17 18  1  0  0  0  0
 17 22  1  0  0  0  0
 18 19  1  0  0  0  0
 18 36  1  0  0  0  0
 18 37  1  0  0  0  0
 19 20  1  0  0  0  0
 19 21  1  0  0  0  0
 22 23  1  0  0  0  0
 22 38  1  0  0  0  0
 23 24  1  0  0  0  0
 23 25  2  0  0  0  0
 24 39  1  0  0  0  0
M  CHG  2  20  -1  21  -1
M  END
$$$$
RDU08
 OpenBabel09302314563D

 38 39  0  0  1  0  0  0  0  0999 V2000
   -2.1280   -2.5070   -1.1850 O   0  0  0  0  0  0  0  0  0  0  0  0
   -1.0850   -1.9430   -0.9410 C   0  0  0  0  0  0  0  0  0  0  0  0
    0.0740   -2.6850   -0.8300 O   0  0  0  0  0  0  0  0  0  0  0  0
   -0.0710   -4.0800   -1.0320 C   0  0  0  0  0  0  0  0  0  0  0  0
   -0.8050   -0.5470   -0.7470 C   0  0  0  0  0  0  0  0  0  0  0  0
    0.6110   -0.1020   -0.9560 C   0  0  2  0  0  0  0  0  0  0  0  0
    1.0900   -0.6980   -1.7910 H   0  0  0  0  0  0  0  0  0  0  0  0
    1.4760   -0.2780    0.2850 C   0  0  0  0  0  0  0  0  0  0  0  0
    2.7930    0.2190    0.2900 C   0  0  0  0  0  0  0  0  0  0  0  0
    3.1480    0.8260   -0.8850 O   0  0  0  0  0  0  0  0  0  0  0  0
    4.2930    1.6640   -0.8590 C   0  0  0  0  0  0  0  0  0  0  0  0
    3.6380    0.0710    1.3840 C   0  0  0  0  0  0  0  0  0  0  0  0
    3.1550   -0.5960    2.5130 C   0  0  0  0  0  0  0  0  0  0  0  0
    1.8580   -1.0920    2.5340 C   0  0  0  0  0  0  0  0  0  0  0  0
    1.0240   -0.9320    1.4220 C   0  0  0  0  0  0  0  0  0  0  0  0
   -1.7900    0.3650   -0.4090 C   0  0  0  0  0  0  0  0  0  0  0  0
   -3.1590   -0.0270   -0.0080 C   0  0  0  0  0  0  0  0  0  0  0  0
   -3.8590    0.9210    1.0590 C   0  0  0  0  0  3  0  0  0  0  0  0
   -4.5390    0.3440    1.8970 O   0  5  0  0  0  0  0  0  0  0  0  0
   -3.6630    2.1360    0.8930 O   0  5  0  0  0  0  0  0  0  0  0  0
   -1.5120    1.7100   -0.4530 N   0  0  0  0  0  0  0  0  0  0  0  0
   -0.2820    2.2170   -0.9110 C   0  0  0  0  0  0  0  0  0  0  0  0
    0.6540    1.3090   -1.3940 N   0  0  0  0  0  0  0  0  0  0  0  0
   -0.0860    3.4170   -0.9710 O   0  0  0  0  0  0  0  0  0  0  0  0
    0.9450   -4.4610   -0.8930 H   0  0  0  0  0  0  0  0  0  0  0  0
   -0.4390   -4.2820   -2.0420 H   0  0  0  0  0  0  0  0  0  0  0  0
   -0.7590   -4.4990   -0.2900 H   0  0  0  0  0  0  0  0  0  0  0  0
    4.2690    2.1260   -1.8550 H   0  0  0  0  0  0  0  0  0  0  0  0
    5.2010    1.0690   -0.7330 H   0  0  0  0  0  0  0  0  0  0  0  0
    4.2030    2.4280   -0.0790 H   0  0  0  0  0  0  0  0  0  0  0  0
    4.6480    0.4570    1.3730 H   0  0  0  0  0  0  0  0  0  0  0  0
    3.8020   -0.7190    3.3770 H   0  0  0  0  0  0  0  0  0  0  0  0
    1.4820   -1.6020    3.4160 H   0  0  0  0  0  0  0  0  0  0  0  0
    0.0010   -1.3240    1.4520 H   0  0  0  0  0  0  0  0  0  0  0  0
   -3.1950   -1.0550    0.4040 H   0  0  0  0  0  0  0  0  0  0  0  0
   -3.8400   -0.0410   -0.8790 H   0  0  0  0  0  0  0  0  0  0  0  0
   -2.2250    2.4020   -0.0720 H   0  0  0  0  0  0  0  0  0  0  0  0
    1.5990    1.6730   -1.5510 H   0  0  0  0  0  0  0  0  0  0  0  0
  1  2  2  0  0  0  0
  2  3  1  0  0  0  0
  2  5  1  0  0  0  0
  3  4  1  0  0  0  0
  4 25  1  0  0  0  0
  4 26  1  0  0  0  0
  4 27  1  0  0  0  0
  5  6  1  0  0  0  0
  5 16  2  0  0  0  0
  6  7  1  6  0  0  0
  6  8  1  0  0  0  0
  6 23  1  0  0  0  0
  8  9  2  0  0  0  0
  8 15  1  0  0  0  0
  9 10  1  0  0  0  0
  9 12  1  0  0  0  0
 10 11  1  0  0  0  0
 11 28  1  0  0  0  0
 11 29  1  0  0  0  0
 11 30  1  0  0  0  0
 12 13  2  0  0  0  0
 12 31  1  0  0  0  0
 13 14  1  0  0  0  0
 13 32  1  0  0  0  0
 14 15  2  0  0  0  0
 14 33  1  0  0  0  0
 15 34  1  0  0  0  0
 16 17  1  0  0  0  0
 16 21  1  0  0  0  0
 17 18  1  0  0  0  0
 17 35  1  0  0  0  0
 17 36  1  0  0  0  0
 18 19  1  0  0  0  0
 18 20  1  0  0  0  0
 21 22  1  0  0  0  0
 21 37  1  0  0  0  0
 22 23  1  0  0  0  0
 22 24  2  0  0  0  0
 23 38  1  0  0  0  0
M  CHG  2  19  -1  20  -1
M  END
$$$$
RDU09
 OpenBabel09302314563D

 42 43  0  0  1  0  0  0  0  0999 V2000
   -1.8330   -3.0120    0.0800 O   0  0  0  0  0  0  0  0  0  0  0  0
   -1.0190   -2.1320    0.2400 C   0  0  0  0  0  0  0  0  0  0  0  0
    0.3260   -2.4380    0.1490 O   0  0  0  0  0  0  0  0  0  0  0  0
    0.6250   -3.7820   -0.1860 C   0  0  0  0  0  0  0  0  0  0  0  0
   -1.1960   -0.7430    0.5630 C   0  0  0  0  0  0  0  0  0  0  0  0
   -0.0020   -0.0380    1.1360 C   0  0  1  0  0  0  0  0  0  0  0  0
    0.5290   -0.7230    1.8630 H   0  0  0  0  0  0  0  0  0  0  0  0
    0.9640    0.3860    0.0370 C   0  0  0  0  0  0  0  0  0  0  0  0
    2.3340    0.3680    0.2780 C   0  0  0  0  0  0  0  0  0  0  0  0
    2.7920    0.0920    1.5430 O   0  0  0  0  0  0  0  0  0  0  0  0
    3.2650   -1.2490    1.6660 C   0  0  0  0  0  0  0  0  0  0  0  0
    3.2420    0.7330   -0.7370 C   0  0  0  0  0  0  0  0  0  0  0  0
    4.5520    0.6240   -0.3710 O   0  0  0  0  0  0  0  0  0  0  0  0
    5.5130    1.0280   -1.3350 C   0  0  0  0  0  0  0  0  0  0  0  0
    2.7750    1.1470   -1.9790 C   0  0  0  0  0  0  0  0  0  0  0  0
    1.3960    1.1840   -2.2050 C   0  0  0  0  0  0  0  0  0  0  0  0
    0.5010    0.8080   -1.2130 C   0  0  0  0  0  0  0  0  0  0  0  0
   -2.3900   -0.0740    0.3630 C   0  0  0  0  0  0  0  0  0  0  0  0
   -3.5400   -0.6410   -0.3730 C   0  0  0  0  0  0  0  0  0  0  0  0
   -4.3810    0.4080   -1.2260 C   0  0  0  0  0  3  0  0  0  0  0  0
   -4.5870    1.4960   -0.6640 O   0  5  0  0  0  0  0  0  0  0  0  0
   -4.7520    0.0080   -2.3200 O   0  5  0  0  0  0  0  0  0  0  0  0
   -2.5460    1.1950    0.8710 N   0  0  0  0  0  0  0  0  0  0  0  0
   -1.5580    1.8460    1.6320 C   0  0  0  0  0  0  0  0  0  0  0  0
   -0.3920    1.1510    1.9150 N   0  0  0  0  0  0  0  0  0  0  0  0
   -1.7600    2.9540    2.0940 O   0  0  0  0  0  0  0  0  0  0  0  0
    1.7160   -3.7910   -0.2490 H   0  0  0  0  0  0  0  0  0  0  0  0
    0.1710   -4.0420   -1.1490 H   0  0  0  0  0  0  0  0  0  0  0  0
    0.2590   -4.4570    0.5940 H   0  0  0  0  0  0  0  0  0  0  0  0
    3.4830   -1.3310    2.7350 H   0  0  0  0  0  0  0  0  0  0  0  0
    4.1720   -1.3870    1.0710 H   0  0  0  0  0  0  0  0  0  0  0  0
    2.4890   -1.9630    1.3640 H   0  0  0  0  0  0  0  0  0  0  0  0
    6.4580    0.8740   -0.7990 H   0  0  0  0  0  0  0  0  0  0  0  0
    5.3900    2.0850   -1.5920 H   0  0  0  0  0  0  0  0  0  0  0  0
    5.4680    0.3930   -2.2240 H   0  0  0  0  0  0  0  0  0  0  0  0
    3.4570    1.4380   -2.7670 H   0  0  0  0  0  0  0  0  0  0  0  0
    1.0230    1.5090   -3.1760 H   0  0  0  0  0  0  0  0  0  0  0  0
   -0.5750    0.8280   -1.4100 H   0  0  0  0  0  0  0  0  0  0  0  0
   -4.2670   -1.1100    0.3150 H   0  0  0  0  0  0  0  0  0  0  0  0
   -3.2370   -1.4460   -1.0720 H   0  0  0  0  0  0  0  0  0  0  0  0
   -3.4160    1.7540    0.6140 H   0  0  0  0  0  0  0  0  0  0  0  0
    0.3650    1.6710    2.3430 H   0  0  0  0  0  0  0  0  0  0  0  0
  1  2  2  0  0  0  0
  2  3  1  0  0  0  0
  2  5  1  0  0  0  0
  3  4  1  0  0  0  0
  4 27  1  0  0  0  0
  4 28  1  0  0  0  0
  4 29  1  0  0  0  0
  5  6  1  0  0  0  0
  5 18  2  0  0  0  0
  6  7  1  1  0  0  0
  6  8  1  0  0  0  0
  6 25  1  0  0  0  0
  8  9  2  0  0  0  0
  8 17  1  0  0  0  0
  9 10  1  0  0  0  0
  9 12  1  0  0  0  0
 10 11  1  0  0  0  0
 11 30  1  0  0  0  0
 11 31  1  0  0  0  0
 11 32  1  0  0  0  0
 12 13  1  0  0  0  0
 12 15  2  0  0  0  0
 13 14  1  0  0  0  0
 14 33  1  0  0  0  0
 14 34  1  0  0  0  0
 14 35  1  0  0  0  0
 15 16  1  0  0  0  0
 15 36  1  0  0  0  0
 16 17  2  0  0  0  0
 16 37  1  0  0  0  0
 17 38  1  0  0  0  0
 18 19  1  0  0  0  0
 18 23  1  0  0  0  0
 19 20  1  0  0  0  0
 19 39  1  0  0  0  0
 19 40  1  0  0  0  0
 20 21  1  0  0  0  0
 20 22  1  0  0  0  0
 23 24  1  0  0  0  0
 23 41  1  0  0  0  0
 24 25  1  0  0  0  0
 24 26  2  0  0  0  0
 25 42  1  0  0  0  0
M  CHG  2  21  -1  22  -1
M  END
$$$$
RDU10
 OpenBabel09302314563D

 42 43  0  0  1  0  0  0  0  0999 V2000
   -1.8250   -2.7530    0.7140 O   0  0  0  0  0  0  0  0  0  0  0  0
   -1.0350   -2.0330    0.1460 C   0  0  0  0  0  0  0  0  0  0  0  0
    0.2510   -2.4960   -0.0720 O   0  0  0  0  0  0  0  0  0  0  0  0
    0.5310   -3.7800    0.4570 C   0  0  0  0  0  0  0  0  0  0  0  0
   -1.2010   -0.7100   -0.3840 C   0  0  0  0  0  0  0  0  0  0  0  0
   -0.0680   -0.1680   -1.2030 C   0  0  2  0  0  0  0  0  0  0  0  0
    0.2780   -0.9560   -1.9380 H   0  0  0  0  0  0  0  0  0  0  0  0
    1.0960    0.2540   -0.3240 C   0  0  0  0  0  0  0  0  0  0  0  0
    2.4080    0.1230   -0.7730 C   0  0  0  0  0  0  0  0  0  0  0  0
    2.6380   -0.2830   -2.0710 O   0  0  0  0  0  0  0  0  0  0  0  0
    2.9180   -1.6760   -2.1590 C   0  0  0  0  0  0  0  0  0  0  0  0
    3.5130    0.4860    0.0030 C   0  0  0  0  0  0  0  0  0  0  0  0
    3.2590    1.0050    1.2690 C   0  0  0  0  0  0  0  0  0  0  0  0
    4.2120    1.4060    2.1560 O   0  0  0  0  0  0  0  0  0  0  0  0
    5.5630    1.3290    1.7290 C   0  0  0  0  0  0  0  0  0  0  0  0
    1.9510    1.1620    1.7570 C   0  0  0  0  0  0  0  0  0  0  0  0
    0.8850    0.7840    0.9530 C   0  0  0  0  0  0  0  0  0  0  0  0
   -2.3490    0.0330   -0.1510 C   0  0  0  0  0  0  0  0  0  0  0  0
   -3.4250   -0.4490    0.7450 C   0  0  0  0  0  0  0  0  0  0  0  0
   -4.5840    0.5350    1.1730 C   0  0  0  0  0  3  0  0  0  0  0  0
   -5.2500    0.1420    2.1250 O   0  5  0  0  0  0  0  0  0  0  0  0
   -4.7130    1.5750    0.5060 O   0  5  0  0  0  0  0  0  0  0  0  0
   -2.4890    1.2590   -0.7460 N   0  0  0  0  0  0  0  0  0  0  0  0
   -1.5610    1.7770   -1.6710 C   0  0  0  0  0  0  0  0  0  0  0  0
   -0.4850    0.9810   -2.0300 N   0  0  0  0  0  0  0  0  0  0  0  0
   -1.7460    2.8620   -2.1900 O   0  0  0  0  0  0  0  0  0  0  0  0
    1.5850   -3.9320    0.2110 H   0  0  0  0  0  0  0  0  0  0  0  0
   -0.1060   -4.5330   -0.0170 H   0  0  0  0  0  0  0  0  0  0  0  0
    0.3720   -3.7840    1.5410 H   0  0  0  0  0  0  0  0  0  0  0  0
    2.9730   -1.8470   -3.2390 H   0  0  0  0  0  0  0  0  0  0  0  0
    2.1060   -2.2650   -1.7110 H   0  0  0  0  0  0  0  0  0  0  0  0
    3.8720   -1.9020   -1.6750 H   0  0  0  0  0  0  0  0  0  0  0  0
    4.5100    0.3660   -0.3920 H   0  0  0  0  0  0  0  0  0  0  0  0
    6.1070    1.7220    2.5970 H   0  0  0  0  0  0  0  0  0  0  0  0
    5.7320    1.9610    0.8520 H   0  0  0  0  0  0  0  0  0  0  0  0
    5.8510    0.2910    1.5340 H   0  0  0  0  0  0  0  0  0  0  0  0
    1.7890    1.5710    2.7500 H   0  0  0  0  0  0  0  0  0  0  0  0
   -0.1410    0.8940    1.3240 H   0  0  0  0  0  0  0  0  0  0  0  0
   -2.9990   -0.8490    1.6910 H   0  0  0  0  0  0  0  0  0  0  0  0
   -3.9350   -1.3290    0.2960 H   0  0  0  0  0  0  0  0  0  0  0  0
   -3.3570    1.8450   -0.5520 H   0  0  0  0  0  0  0  0  0  0  0  0
    0.2450    1.4150   -2.5810 H   0  0  0  0  0  0  0  0  0  0  0  0
  1  2  2  0  0  0  0
  2  3  1  0  0  0  0
  2  5  1  0  0  0  0
  3  4  1  0  0  0  0
  4 27  1  0  0  0  0
  4 28  1  0  0  0  0
  4 29  1  0  0  0  0
  5  6  1  0  0  0  0
  5 18  2  0  0  0  0
  6  7  1  6  0  0  0
  6  8  1  0  0  0  0
  6 25  1  0  0  0  0
  8  9  2  0  0  0  0
  8 17  1  0  0  0  0
  9 10  1  0  0  0  0
  9 12  1  0  0  0  0
 10 11  1  0  0  0  0
 11 30  1  0  0  0  0
 11 31  1  0  0  0  0
 11 32  1  0  0  0  0
 12 13  2  0  0  0  0
 12 33  1  0  0  0  0
 13 14  1  0  0  0  0
 13 16  1  0  0  0  0
 14 15  1  0  0  0  0
 15 34  1  0  0  0  0
 15 35  1  0  0  0  0
 15 36  1  0  0  0  0
 16 17  2  0  0  0  0
 16 37  1  0  0  0  0
 17 38  1  0  0  0  0
 18 19  1  0  0  0  0
 18 23  1  0  0  0  0
 19 20  1  0  0  0  0
 19 39  1  0  0  0  0
 19 40  1  0  0  0  0
 20 21  1  0  0  0  0
 20 22  1  0  0  0  0
 23 24  1  0  0  0  0
 23 41  1  0  0  0  0
 24 25  1  0  0  0  0
 24 26  2  0  0  0  0
 25 42  1  0  0  0  0
M  CHG  2  21  -1  22  -1
M  END
$$$$
RDU11
 OpenBabel09302314563D

 42 43  0  0  1  0  0  0  0  0999 V2000
   -1.1310   -2.9550    0.9790 O   0  0  0  0  0  0  0  0  0  0  0  0
   -1.0060   -2.1040    0.1300 C   0  0  0  0  0  0  0  0  0  0  0  0
   -0.9580   -2.5870   -1.1550 O   0  0  0  0  0  0  0  0  0  0  0  0
   -0.4000   -1.7540   -2.1560 C   0  0  0  0  0  0  0  0  0  0  0  0
   -0.9300   -0.6660    0.3760 C   0  0  0  0  0  0  0  0  0  0  0  0
    0.1920   -0.2600    1.2850 C   0  0  1  0  0  0  0  0  0  0  0  0
    0.3360   -1.0550    2.0790 H   0  0  0  0  0  0  0  0  0  0  0  0
    1.4840   -0.1180    0.4870 C   0  0  0  0  0  0  0  0  0  0  0  0
    2.2030   -1.2630    0.1270 C   0  0  0  0  0  0  0  0  0  0  0  0
    1.6230   -2.4930    0.3160 O   0  0  0  0  0  0  0  0  0  0  0  0
    1.9940   -3.1300    1.5330 C   0  0  0  0  0  0  0  0  0  0  0  0
    3.4090   -1.1950   -0.5730 C   0  0  0  0  0  0  0  0  0  0  0  0
    3.9070    0.0430   -0.9550 C   0  0  0  0  0  0  0  0  0  0  0  0
    3.1690    1.1900   -0.6280 C   0  0  0  0  0  0  0  0  0  0  0  0
    3.7480    2.3440   -1.0670 O   0  0  0  0  0  0  0  0  0  0  0  0
    2.9950    3.5390   -0.9020 C   0  0  0  0  0  0  0  0  0  0  0  0
    1.9730    1.1220    0.0850 C   0  0  0  0  0  0  0  0  0  0  0  0
   -1.8600    0.2380   -0.0550 C   0  0  0  0  0  0  0  0  0  0  0  0
   -2.9820   -0.0970   -0.9600 C   0  0  0  0  0  0  0  0  0  0  0  0
   -4.3430    0.6730   -0.6410 C   0  0  0  0  0  3  0  0  0  0  0  0
   -4.2010    1.8820   -0.3960 O   0  5  0  0  0  0  0  0  0  0  0  0
   -5.3560   -0.0030   -0.7300 O   0  5  0  0  0  0  0  0  0  0  0  0
   -1.7410    1.5760    0.3150 N   0  0  0  0  0  0  0  0  0  0  0  0
   -0.8960    1.9700    1.3570 C   0  0  0  0  0  0  0  0  0  0  0  0
   -0.1350    0.9850    1.9960 N   0  0  0  0  0  0  0  0  0  0  0  0
   -0.8240    3.1300    1.7240 O   0  0  0  0  0  0  0  0  0  0  0  0
   -1.1670   -1.0710   -2.5350 H   0  0  0  0  0  0  0  0  0  0  0  0
   -0.0920   -2.4670   -2.9280 H   0  0  0  0  0  0  0  0  0  0  0  0
    0.4710   -1.2010   -1.7850 H   0  0  0  0  0  0  0  0  0  0  0  0
    1.2240   -3.9140    1.6220 H   0  0  0  0  0  0  0  0  0  0  0  0
    1.9400   -2.4530    2.3880 H   0  0  0  0  0  0  0  0  0  0  0  0
    2.9920   -3.5600    1.4330 H   0  0  0  0  0  0  0  0  0  0  0  0
    3.9340   -2.1130   -0.8270 H   0  0  0  0  0  0  0  0  0  0  0  0
    4.8380    0.1320   -1.5040 H   0  0  0  0  0  0  0  0  0  0  0  0
    3.6330    4.2870   -1.3860 H   0  0  0  0  0  0  0  0  0  0  0  0
    2.8650    3.7740    0.1600 H   0  0  0  0  0  0  0  0  0  0  0  0
    2.0280    3.4690   -1.4140 H   0  0  0  0  0  0  0  0  0  0  0  0
    1.4180    2.0310    0.3150 H   0  0  0  0  0  0  0  0  0  0  0  0
   -3.2070   -1.1800   -0.9550 H   0  0  0  0  0  0  0  0  0  0  0  0
   -2.7580    0.1830   -2.0050 H   0  0  0  0  0  0  0  0  0  0  0  0
   -2.5450    2.2310    0.0660 H   0  0  0  0  0  0  0  0  0  0  0  0
    0.5460    1.3150    2.6650 H   0  0  0  0  0  0  0  0  0  0  0  0
  1  2  2  0  0  0  0
  2  3  1  0  0  0  0
  2  5  1  0  0  0  0
  3  4  1  0  0  0  0
  4 27  1  0  0  0  0
  4 28  1  0  0  0  0
  4 29  1  0  0  0  0
  5  6  1  0  0  0  0
  5 18  2  0  0  0  0
  6  7  1  1  0  0  0
  6  8  1  0  0  0  0
  6 25  1  0  0  0  0
  8  9  2  0  0  0  0
  8 17  1  0  0  0  0
  9 10  1  0  0  0  0
  9 12  1  0  0  0  0
 10 11  1  0  0  0  0
 11 30  1  0  0  0  0
 11 31  1  0  0  0  0
 11 32  1  0  0  0  0
 12 13  2  0  0  0  0
 12 33  1  0  0  0  0
 13 14  1  0  0  0  0
 13 34  1  0  0  0  0
 14 15  1  0  0  0  0
 14 17  2  0  0  0  0
 15 16  1  0  0  0  0
 16 35  1  0  0  0  0
 16 36  1  0  0  0  0
 16 37  1  0  0  0  0
 17 38  1  0  0  0  0
 18 19  1  0  0  0  0
 18 23  1  0  0  0  0
 19 20  1  0  0  0  0
 19 39  1  0  0  0  0
 19 40  1  0  0  0  0
 20 21  1  0  0  0  0
 20 22  1  0  0  0  0
 23 24  1  0  0  0  0
 23 41  1  0  0  0  0
 24 25  1  0  0  0  0
 24 26  2  0  0  0  0
 25 42  1  0  0  0  0
M  CHG  2  21  -1  22  -1
M  END
$$$$
RDU12
 OpenBabel09302314563D

 38 39  0  0  1  0  0  0  0  0999 V2000
    0.1890   -2.2880    1.6540 O   0  0  0  0  0  0  0  0  0  0  0  0
   -0.5630   -1.7700    0.8520 C   0  0  0  0  0  0  0  0  0  0  0  0
   -1.1970   -2.5410   -0.0830 O   0  0  0  0  0  0  0  0  0  0  0  0
   -0.9320   -3.9340   -0.0140 C   0  0  0  0  0  0  0  0  0  0  0  0
   -0.8730   -0.3690    0.7270 C   0  0  0  0  0  0  0  0  0  0  0  0
    0.1230    0.5010    1.4440 C   0  0  1  0  0  0  0  0  0  0  0  0
    0.2860    0.0980    2.4890 H   0  0  0  0  0  0  0  0  0  0  0  0
    1.4400    0.4850    0.6820 C   0  0  0  0  0  0  0  0  0  0  0  0
    1.6080    1.2400   -0.4830 C   0  0  0  0  0  0  0  0  0  0  0  0
    2.8060    1.1980   -1.1820 C   0  0  0  0  0  0  0  0  0  0  0  0
    3.8340    0.3730   -0.7030 C   0  0  0  0  0  0  0  0  0  0  0  0
    4.9620    0.4300   -1.4710 O   0  0  0  0  0  0  0  0  0  0  0  0
    6.0220   -0.4460   -1.1230 C   0  0  0  0  0  0  0  0  0  0  0  0
    3.6810   -0.4020    0.4440 C   0  0  0  0  0  0  0  0  0  0  0  0
    2.4690   -0.3390    1.1320 C   0  0  0  0  0  0  0  0  0  0  0  0
   -1.9360    0.1660    0.0290 C   0  0  0  0  0  0  0  0  0  0  0  0
   -2.9130   -0.6650   -0.7110 C   0  0  0  0  0  0  0  0  0  0  0  0
   -4.3020   -0.0270   -1.1260 C   0  0  0  0  0  3  0  0  0  0  0  0
   -4.3230    1.2060   -1.2730 O   0  5  0  0  0  0  0  0  0  0  0  0
   -5.2010   -0.8440   -1.2900 O   0  5  0  0  0  0  0  0  0  0  0  0
   -2.0910    1.5340   -0.0200 N   0  0  0  0  0  0  0  0  0  0  0  0
   -1.3100    2.4170    0.7430 C   0  0  0  0  0  0  0  0  0  0  0  0
   -0.3700    1.8780    1.6140 N   0  0  0  0  0  0  0  0  0  0  0  0
   -1.4870    3.6200    0.6840 O   0  0  0  0  0  0  0  0  0  0  0  0
   -1.5470   -4.3400   -0.8250 H   0  0  0  0  0  0  0  0  0  0  0  0
   -1.2370   -4.3320    0.9580 H   0  0  0  0  0  0  0  0  0  0  0  0
    0.1320   -4.1250   -0.1810 H   0  0  0  0  0  0  0  0  0  0  0  0
    0.7870    1.8600   -0.8530 H   0  0  0  0  0  0  0  0  0  0  0  0
    2.9510    1.7790   -2.0870 H   0  0  0  0  0  0  0  0  0  0  0  0
    6.7660   -0.2370   -1.9020 H   0  0  0  0  0  0  0  0  0  0  0  0
    5.6990   -1.4910   -1.1720 H   0  0  0  0  0  0  0  0  0  0  0  0
    6.4220   -0.1990   -0.1350 H   0  0  0  0  0  0  0  0  0  0  0  0
    4.4690   -1.0490    0.8020 H   0  0  0  0  0  0  0  0  0  0  0  0
    2.3190   -0.9630    2.0170 H   0  0  0  0  0  0  0  0  0  0  0  0
   -3.1620   -1.5840   -0.1380 H   0  0  0  0  0  0  0  0  0  0  0  0
   -2.4710   -1.0270   -1.6620 H   0  0  0  0  0  0  0  0  0  0  0  0
   -2.9250    1.9460   -0.5400 H   0  0  0  0  0  0  0  0  0  0  0  0
    0.2730    2.5330    2.0390 H   0  0  0  0  0  0  0  0  0  0  0  0
  1  2  2  0  0  0  0
  2  3  1  0  0  0  0
  2  5  1  0  0  0  0
  3  4  1  0  0  0  0
  4 25  1  0  0  0  0
  4 26  1  0  0  0  0
  4 27  1  0  0  0  0
  5  6  1  0  0  0  0
  5 16  2  0  0  0  0
  6  7  1  1  0  0  0
  6  8  1  0  0  0  0
  6 23  1  0  0  0  0
  8  9  2  0  0  0  0
  8 15  1  0  0  0  0
  9 10  1  0  0  0  0
  9 28  1  0  0  0  0
 10 11  2  0  0  0  0
 10 29  1  0  0  0  0
 11 12  1  0  0  0  0
 11 14  1  0  0  0  0
 12 13  1  0  0  0  0
 13 30  1  0  0  0  0
 13 31  1  0  0  0  0
 13 32  1  0  0  0  0
 14 15  2  0  0  0  0
 14 33  1  0  0  0  0
 15 34  1  0  0  0  0
 16 17  1  0  0  0  0
 16 21  1  0  0  0  0
 17 18  1  0  0  0  0
 17 35  1  0  0  0  0
 17 36  1  0  0  0  0
 18 19  1  0  0  0  0
 18 20  1  0  0  0  0
 21 22  1  0  0  0  0
 21 37  1  0  0  0  0
 22 23  1  0  0  0  0
 22 24  2  0  0  0  0
 23 38  1  0  0  0  0
M  CHG  2  19  -1  20  -1
M  END
$$$$
RDU13
 OpenBabel09302314563D

 46 47  0  0  1  0  0  0  0  0999 V2000
   -0.0540    3.0510    0.9720 O   0  0  0  0  0  0  0  0  0  0  0  0
   -0.7050    2.0260    0.9520 C   0  0  0  0  0  0  0  0  0  0  0  0
   -1.1670    1.4910    2.1210 O   0  0  0  0  0  0  0  0  0  0  0  0
   -0.8530    2.2090    3.3030 C   0  0  0  0  0  0  0  0  0  0  0  0
   -1.0510    1.2120   -0.1890 C   0  0  0  0  0  0  0  0  0  0  0  0
    0.0450    1.1690   -1.2230 C   0  0  1  0  0  0  0  0  0  0  0  0
    0.4090    2.2230   -1.4130 H   0  0  0  0  0  0  0  0  0  0  0  0
    1.1840    0.3020   -0.7290 C   0  0  0  0  0  0  0  0  0  0  0  0
    2.5020    0.7510   -0.7260 C   0  0  0  0  0  0  0  0  0  0  0  0
    2.7910    1.9270   -1.3780 O   0  0  0  0  0  0  0  0  0  0  0  0
    3.0740    2.9980   -0.4820 C   0  0  0  0  0  0  0  0  0  0  0  0
    3.5560    0.0180   -0.1770 C   0  0  0  0  0  0  0  0  0  0  0  0
    3.2550   -1.2300    0.3770 C   0  0  0  0  0  0  0  0  0  0  0  0
    4.3470   -1.8550    0.8960 O   0  0  0  0  0  0  0  0  0  0  0  0
    4.1360   -3.1240    1.4990 C   0  0  0  0  0  0  0  0  0  0  0  0
    1.9640   -1.7540    0.3730 C   0  0  0  0  0  0  0  0  0  0  0  0
    0.9430   -0.9840   -0.1960 C   0  0  0  0  0  0  0  0  0  0  0  0
   -0.3330   -1.3830   -0.3140 O   0  0  0  0  0  0  0  0  0  0  0  0
   -0.7290   -2.5950    0.3200 C   0  0  0  0  0  0  0  0  0  0  0  0
   -2.2100    0.4910   -0.3410 C   0  0  0  0  0  0  0  0  0  0  0  0
   -3.3230    0.4120    0.6350 C   0  0  0  0  0  0  0  0  0  0  0  0
   -3.7600   -1.0880    0.9160 C   0  0  0  0  0  3  0  0  0  0  0  0
   -3.8290   -1.8010   -0.1020 O   0  5  0  0  0  0  0  0  0  0  0  0
   -3.9970   -1.3720    2.0820 O   0  5  0  0  0  0  0  0  0  0  0  0
   -2.4570   -0.1770   -1.5310 N   0  0  0  0  0  0  0  0  0  0  0  0
   -1.5310   -0.1980   -2.5880 C   0  0  0  0  0  0  0  0  0  0  0  0
   -0.4480    0.6740   -2.5250 N   0  0  0  0  0  0  0  0  0  0  0  0
   -1.7420   -0.8660   -3.5850 O   0  0  0  0  0  0  0  0  0  0  0  0
   -1.3300    1.6080    4.0860 H   0  0  0  0  0  0  0  0  0  0  0  0
   -1.2720    3.2180    3.2620 H   0  0  0  0  0  0  0  0  0  0  0  0
    0.2310    2.2560    3.4390 H   0  0  0  0  0  0  0  0  0  0  0  0
    3.2460    3.8400   -1.1600 H   0  0  0  0  0  0  0  0  0  0  0  0
    3.9630    2.7810    0.1140 H   0  0  0  0  0  0  0  0  0  0  0  0
    2.2050    3.1930    0.1610 H   0  0  0  0  0  0  0  0  0  0  0  0
    4.5670    0.3990   -0.1900 H   0  0  0  0  0  0  0  0  0  0  0  0
    5.1420   -3.3930    1.8420 H   0  0  0  0  0  0  0  0  0  0  0  0
    3.7750   -3.8480    0.7620 H   0  0  0  0  0  0  0  0  0  0  0  0
    3.4500   -3.0420    2.3480 H   0  0  0  0  0  0  0  0  0  0  0  0
    1.7460   -2.7230    0.7940 H   0  0  0  0  0  0  0  0  0  0  0  0
   -1.8200   -2.6100    0.0950 H   0  0  0  0  0  0  0  0  0  0  0  0
   -0.5870   -2.5360    1.4020 H   0  0  0  0  0  0  0  0  0  0  0  0
   -0.2320   -3.4550   -0.1270 H   0  0  0  0  0  0  0  0  0  0  0  0
   -4.2300    0.9150    0.2580 H   0  0  0  0  0  0  0  0  0  0  0  0
   -3.0870    0.8740    1.6090 H   0  0  0  0  0  0  0  0  0  0  0  0
   -3.1980   -0.9380   -1.5160 H   0  0  0  0  0  0  0  0  0  0  0  0
    0.2650    0.5430   -3.2330 H   0  0  0  0  0  0  0  0  0  0  0  0
  1  2  2  0  0  0  0
  2  3  1  0  0  0  0
  2  5  1  0  0  0  0
  3  4  1  0  0  0  0
  4 29  1  0  0  0  0
  4 30  1  0  0  0  0
  4 31  1  0  0  0  0
  5  6  1  0  0  0  0
  5 20  2  0  0  0  0
  6  7  1  6  0  0  0
  6  8  1  0  0  0  0
  6 27  1  0  0  0  0
  8  9  2  0  0  0  0
  8 17  1  0  0  0  0
  9 10  1  0  0  0  0
  9 12  1  0  0  0  0
 10 11  1  0  0  0  0
 11 32  1  0  0  0  0
 11 33  1  0  0  0  0
 11 34  1  0  0  0  0
 12 13  2  0  0  0  0
 12 35  1  0  0  0  0
 13 14  1  0  0  0  0
 13 16  1  0  0  0  0
 14 15  1  0  0  0  0
 15 36  1  0  0  0  0
 15 37  1  0  0  0  0
 15 38  1  0  0  0  0
 16 17  2  0  0  0  0
 16 39  1  0  0  0  0
 17 18  1  0  0  0  0
 18 19  1  0  0  0  0
 19 40  1  0  0  0  0
 19 41  1  0  0  0  0
 19 42  1  0  0  0  0
 20 21  1  0  0  0  0
 20 25  1  0  0  0  0
 21 22  1  0  0  0  0
 21 43  1  0  0  0  0
 21 44  1  0  0  0  0
 22 23  1  0  0  0  0
 22 24  1  0  0  0  0
 25 26  1  0  0  0  0
 25 45  1  0  0  0  0
 26 27  1  0  0  0  0
 26 28  2  0  0  0  0
 27 46  1  0  0  0  0
M  CHG  2  23  -1  24  -1
M  END
$$$$
RDU14
 OpenBabel09302314563D

 46 47  0  0  1  0  0  0  0  0999 V2000
    2.0420   -2.6100    1.7630 O   0  0  0  0  0  0  0  0  0  0  0  0
    2.4790   -1.6710    1.1330 C   0  0  0  0  0  0  0  0  0  0  0  0
    3.6780   -1.1070    1.4980 O   0  0  0  0  0  0  0  0  0  0  0  0
    4.2520   -1.6150    2.6930 C   0  0  0  0  0  0  0  0  0  0  0  0
    1.9330   -1.0580   -0.0440 C   0  0  0  0  0  0  0  0  0  0  0  0
    0.7260   -1.7400   -0.6200 C   0  0  1  0  0  0  0  0  0  0  0  0
    0.7170   -2.8300   -0.3310 H   0  0  0  0  0  0  0  0  0  0  0  0
   -0.5770   -1.0840   -0.1600 C   0  0  0  0  0  0  0  0  0  0  0  0
   -1.7540   -1.8210   -0.2400 C   0  0  0  0  0  0  0  0  0  0  0  0
   -2.9760   -1.2120    0.0890 C   0  0  0  0  0  0  0  0  0  0  0  0
   -4.0220   -2.0740   -0.0270 O   0  0  0  0  0  0  0  0  0  0  0  0
   -5.3350   -1.5660    0.1500 C   0  0  0  0  0  0  0  0  0  0  0  0
   -3.0240    0.1240    0.4980 C   0  0  0  0  0  0  0  0  0  0  0  0
   -4.2300    0.6490    0.8840 O   0  0  0  0  0  0  0  0  0  0  0  0
   -4.5140    1.9230    0.3080 C   0  0  0  0  0  0  0  0  0  0  0  0
   -1.8150    0.8460    0.5890 C   0  0  0  0  0  0  0  0  0  0  0  0
   -1.9500    2.1350    0.9750 O   0  0  0  0  0  0  0  0  0  0  0  0
   -0.7600    2.9280    1.0030 C   0  0  0  0  0  0  0  0  0  0  0  0
   -0.6020    0.2400    0.2700 C   0  0  0  0  0  0  0  0  0  0  0  0
    2.3930    0.0940   -0.6500 C   0  0  0  0  0  0  0  0  0  0  0  0
    3.2020    1.1480   -0.0060 C   0  0  0  0  0  0  0  0  0  0  0  0
    2.4060    2.5260   -0.1070 C   0  0  0  0  0  3  0  0  0  0  0  0
    2.2210    3.1210    0.9450 O   0  5  0  0  0  0  0  0  0  0  0  0
    2.0460    2.8120   -1.2600 O   0  5  0  0  0  0  0  0  0  0  0  0
    2.0320    0.3630   -1.9570 N   0  0  0  0  0  0  0  0  0  0  0  0
    1.2390   -0.5210   -2.7200 C   0  0  0  0  0  0  0  0  0  0  0  0
    0.7740   -1.6730   -2.0970 N   0  0  0  0  0  0  0  0  0  0  0  0
    1.0470   -0.3170   -3.9030 O   0  0  0  0  0  0  0  0  0  0  0  0
    5.1560   -1.0110    2.8120 H   0  0  0  0  0  0  0  0  0  0  0  0
    4.4910   -2.6760    2.5770 H   0  0  0  0  0  0  0  0  0  0  0  0
    3.5630   -1.4740    3.5320 H   0  0  0  0  0  0  0  0  0  0  0  0
   -1.7470   -2.8620   -0.5470 H   0  0  0  0  0  0  0  0  0  0  0  0
   -5.9520   -2.4550   -0.0160 H   0  0  0  0  0  0  0  0  0  0  0  0
   -5.5570   -0.7930   -0.5920 H   0  0  0  0  0  0  0  0  0  0  0  0
   -5.4700   -1.1840    1.1680 H   0  0  0  0  0  0  0  0  0  0  0  0
   -5.6060    1.9480    0.2720 H   0  0  0  0  0  0  0  0  0  0  0  0
   -4.0850    2.0380   -0.6910 H   0  0  0  0  0  0  0  0  0  0  0  0
   -4.1260    2.6990    0.9810 H   0  0  0  0  0  0  0  0  0  0  0  0
   -1.1430    3.9150    1.2730 H   0  0  0  0  0  0  0  0  0  0  0  0
   -0.2640    2.9620    0.0220 H   0  0  0  0  0  0  0  0  0  0  0  0
   -0.0620    2.5610    1.7670 H   0  0  0  0  0  0  0  0  0  0  0  0
    0.3240    0.8090    0.3680 H   0  0  0  0  0  0  0  0  0  0  0  0
    4.1760    1.3110   -0.4900 H   0  0  0  0  0  0  0  0  0  0  0  0
    3.4090    0.9530    1.0620 H   0  0  0  0  0  0  0  0  0  0  0  0
    2.1180    1.3670   -2.2980 H   0  0  0  0  0  0  0  0  0  0  0  0
    0.0920   -2.2200   -2.6040 H   0  0  0  0  0  0  0  0  0  0  0  0
  1  2  2  0  0  0  0
  2  3  1  0  0  0  0
  2  5  1  0  0  0  0
  3  4  1  0  0  0  0
  4 29  1  0  0  0  0
  4 30  1  0  0  0  0
  4 31  1  0  0  0  0
  5  6  1  0  0  0  0
  5 20  2  0  0  0  0
  6  7  1  1  0  0  0
  6  8  1  0  0  0  0
  6 27  1  0  0  0  0
  8  9  2  0  0  0  0
  8 19  1  0  0  0  0
  9 10  1  0  0  0  0
  9 32  1  0  0  0  0
 10 11  1  0  0  0  0
 10 13  2  0  0  0  0
 11 12  1  0  0  0  0
 12 33  1  0  0  0  0
 12 34  1  0  0  0  0
 12 35  1  0  0  0  0
 13 14  1  0  0  0  0
 13 16  1  0  0  0  0
 14 15  1  0  0  0  0
 15 36  1  0  0  0  0
 15 37  1  0  0  0  0
 15 38  1  0  0  0  0
 16 17  1  0  0  0  0
 16 19  2  0  0  0  0
 17 18  1  0  0  0  0
 18 39  1  0  0  0  0
 18 40  1  0  0  0  0
 18 41  1  0  0  0  0
 19 42  1  0  0  0  0
 20 21  1  0  0  0  0
 20 25  1  0  0  0  0
 21 22  1  0  0  0  0
 21 43  1  0  0  0  0
 21 44  1  0  0  0  0
 22 23  1  0  0  0  0
 22 24  1  0  0  0  0
 25 26  1  0  0  0  0
 25 45  1  0  0  0  0
 26 27  1  0  0  0  0
 26 28  2  0  0  0  0
 27 46  1  0  0  0  0
M  CHG  2  23  -1  24  -1
M  END
$$$$
RDU15
 OpenBabel09302314563D

 34 35  0  0  1  0  0  0  0  0999 V2000
   -1.3460   -2.8160    0.3380 O   0  0  0  0  0  0  0  0  0  0  0  0
   -0.7000   -2.0280   -0.3140 C   0  0  0  0  0  0  0  0  0  0  0  0
    0.4840   -2.4490   -0.8930 O   0  0  0  0  0  0  0  0  0  0  0  0
    0.8480   -3.7920   -0.6180 C   0  0  0  0  0  0  0  0  0  0  0  0
   -0.9530   -0.6460   -0.6160 C   0  0  0  0  0  0  0  0  0  0  0  0
    0.0490    0.0390   -1.4970 C   0  0  2  0  0  0  0  0  0  0  0  0
    0.2540   -0.5960   -2.4090 H   0  0  0  0  0  0  0  0  0  0  0  0
    1.3400    0.2560   -0.7160 C   0  0  0  0  0  0  0  0  0  0  0  0
    2.4960   -0.4220   -1.1050 C   0  0  0  0  0  0  0  0  0  0  0  0
    3.6830   -0.2510   -0.3940 C   0  0  0  0  0  0  0  0  0  0  0  0
    3.6710    0.6030    0.6980 C   0  0  0  0  0  0  0  0  0  0  0  0
    5.1340    0.8250    1.5780 Cl  0  0  0  0  0  0  0  0  0  0  0  0
    2.5360    1.2830    1.1180 C   0  0  0  0  0  0  0  0  0  0  0  0
    1.3580    1.0980    0.3980 C   0  0  0  0  0  0  0  0  0  0  0  0
   -2.0510    0.0250   -0.1010 C   0  0  0  0  0  0  0  0  0  0  0  0
   -3.0160   -0.6310    0.8100 C   0  0  0  0  0  0  0  0  0  0  0  0
   -4.2180    0.1930    1.4200 C   0  0  0  0  0  3  0  0  0  0  0  0
   -5.0020   -0.4830    2.0770 O   0  5  0  0  0  0  0  0  0  0  0  0
   -4.2430    1.4130    1.1880 O   0  5  0  0  0  0  0  0  0  0  0  0
   -2.2520    1.3420   -0.4340 N   0  0  0  0  0  0  0  0  0  0  0  0
   -1.4540    2.0300   -1.3630 C   0  0  0  0  0  0  0  0  0  0  0  0
   -0.4480    1.3250   -2.0120 N   0  0  0  0  0  0  0  0  0  0  0  0
   -1.6730    3.1950   -1.6370 O   0  0  0  0  0  0  0  0  0  0  0  0
    1.7980   -3.9090   -1.1470 H   0  0  0  0  0  0  0  0  0  0  0  0
    0.0870   -4.4770   -1.0030 H   0  0  0  0  0  0  0  0  0  0  0  0
    0.9720   -3.9350    0.4610 H   0  0  0  0  0  0  0  0  0  0  0  0
    2.4670   -1.1080   -1.9510 H   0  0  0  0  0  0  0  0  0  0  0  0
    4.5840   -0.7820   -0.6900 H   0  0  0  0  0  0  0  0  0  0  0  0
    2.5550    1.9370    1.9880 H   0  0  0  0  0  0  0  0  0  0  0  0
    0.4410    1.6040    0.7120 H   0  0  0  0  0  0  0  0  0  0  0  0
   -2.4890   -1.0730    1.6850 H   0  0  0  0  0  0  0  0  0  0  0  0
   -3.4750   -1.5140    0.3130 H   0  0  0  0  0  0  0  0  0  0  0  0
   -3.0690    1.8770   -0.0060 H   0  0  0  0  0  0  0  0  0  0  0  0
    0.1930    1.8670   -2.5740 H   0  0  0  0  0  0  0  0  0  0  0  0
  1  2  2  0  0  0  0
  2  3  1  0  0  0  0
  2  5  1  0  0  0  0
  3  4  1  0  0  0  0
  4 24  1  0  0  0  0
  4 25  1  0  0  0  0
  4 26  1  0  0  0  0
  5  6  1  0  0  0  0
  5 15  2  0  0  0  0
  6  7  1  6  0  0  0
  6  8  1  0  0  0  0
  6 22  1  0  0  0  0
  8  9  2  0  0  0  0
  8 14  1  0  0  0  0
  9 10  1  0  0  0  0
  9 27  1  0  0  0  0
 10 11  2  0  0  0  0
 10 28  1  0  0  0  0
 11 12  1  0  0  0  0
 11 13  1  0  0  0  0
 13 14  2  0  0  0  0
 13 29  1  0  0  0  0
 14 30  1  0  0  0  0
 15 16  1  0  0  0  0
 15 20  1  0  0  0  0
 16 17  1  0  0  0  0
 16 31  1  0  0  0  0
 16 32  1  0  0  0  0
 17 18  1  0  0  0  0
 17 19  1  0  0  0  0
 20 21  1  0  0  0  0
 20 33  1  0  0  0  0
 21 22  1  0  0  0  0
 21 23  2  0  0  0  0
 22 34  1  0  0  0  0
M  CHG  2  18  -1  19  -1
M  END
$$$$
RDU16
 OpenBabel09302314563D

 34 35  0  0  1  0  0  0  0  0999 V2000
    0.7940   -2.2520   -1.0250 O   0  0  0  0  0  0  0  0  0  0  0  0
   -0.2040   -1.8080   -0.4920 C   0  0  0  0  0  0  0  0  0  0  0  0
   -0.9270   -2.5830    0.3690 O   0  0  0  0  0  0  0  0  0  0  0  0
   -0.4470   -3.9080    0.5500 C   0  0  0  0  0  0  0  0  0  0  0  0
   -0.7270   -0.4740   -0.6300 C   0  0  0  0  0  0  0  0  0  0  0  0
    0.2790    0.4570   -1.2410 C   0  0  2  0  0  0  0  0  0  0  0  0
    0.5920    0.0440   -2.2490 H   0  0  0  0  0  0  0  0  0  0  0  0
    1.5050    0.5280   -0.3330 C   0  0  0  0  0  0  0  0  0  0  0  0
    1.4780    1.0630    0.9520 C   0  0  0  0  0  0  0  0  0  0  0  0
    0.0230    1.6760    1.5880 Cl  0  0  0  0  0  0  0  0  0  0  0  0
    2.6000    1.1000    1.7740 C   0  0  0  0  0  0  0  0  0  0  0  0
    3.8010    0.5720    1.3050 C   0  0  0  0  0  0  0  0  0  0  0  0
    3.8180    0.0180    0.0320 C   0  0  0  0  0  0  0  0  0  0  0  0
    5.2890   -0.6540   -0.5440 Cl  0  0  0  0  0  0  0  0  0  0  0  0
    2.7040   -0.0240   -0.7930 C   0  0  0  0  0  0  0  0  0  0  0  0
   -1.9940   -0.0550   -0.2680 C   0  0  0  0  0  0  0  0  0  0  0  0
   -3.0060   -0.9700    0.3070 C   0  0  0  0  0  0  0  0  0  0  0  0
   -4.5310   -0.5430    0.2590 C   0  0  0  0  0  3  0  0  0  0  0  0
   -5.3170   -1.4820    0.3050 O   0  5  0  0  0  0  0  0  0  0  0  0
   -4.7610    0.6760    0.2160 O   0  5  0  0  0  0  0  0  0  0  0  0
   -2.3370    1.2660   -0.4170 N   0  0  0  0  0  0  0  0  0  0  0  0
   -1.4630    2.2290   -0.9480 C   0  0  0  0  0  0  0  0  0  0  0  0
   -0.2600    1.7980   -1.5000 N   0  0  0  0  0  0  0  0  0  0  0  0
   -1.7710    3.4050   -0.9890 O   0  0  0  0  0  0  0  0  0  0  0  0
   -1.1750   -4.3390    1.2450 H   0  0  0  0  0  0  0  0  0  0  0  0
    0.5590   -3.8900    0.9790 H   0  0  0  0  0  0  0  0  0  0  0  0
   -0.4380   -4.4430   -0.4040 H   0  0  0  0  0  0  0  0  0  0  0  0
    2.5460    1.5270    2.7760 H   0  0  0  0  0  0  0  0  0  0  0  0
    4.6920    0.5870    1.9290 H   0  0  0  0  0  0  0  0  0  0  0  0
    2.7390   -0.5160   -1.7700 H   0  0  0  0  0  0  0  0  0  0  0  0
   -2.7930   -1.1540    1.3790 H   0  0  0  0  0  0  0  0  0  0  0  0
   -2.9560   -1.9700   -0.1750 H   0  0  0  0  0  0  0  0  0  0  0  0
   -3.3230    1.5850   -0.1670 H   0  0  0  0  0  0  0  0  0  0  0  0
    0.4100    2.5190   -1.7330 H   0  0  0  0  0  0  0  0  0  0  0  0
  1  2  2  0  0  0  0
  2  3  1  0  0  0  0
  2  5  1  0  0  0  0
  3  4  1  0  0  0  0
  4 25  1  0  0  0  0
  4 26  1  0  0  0  0
  4 27  1  0  0  0  0
  5  6  1  0  0  0  0
  5 16  2  0  0  0  0
  6  7  1  6  0  0  0
  6  8  1  0  0  0  0
  6 23  1  0  0  0  0
  8  9  2  0  0  0  0
  8 15  1  0  0  0  0
  9 10  1  0  0  0  0
  9 11  1  0  0  0  0
 11 12  2  0  0  0  0
 11 28  1  0  0  0  0
 12 13  1  0  0  0  0
 12 29  1  0  0  0  0
 13 14  1  0  0  0  0
 13 15  2  0  0  0  0
 15 30  1  0  0  0  0
 16 17  1  0  0  0  0
 16 21  1  0  0  0  0
 17 18  1  0  0  0  0
 17 31  1  0  0  0  0
 17 32  1  0  0  0  0
 18 19  1  0  0  0  0
 18 20  1  0  0  0  0
 21 22  1  0  0  0  0
 21 33  1  0  0  0  0
 22 23  1  0  0  0  0
 22 24  2  0  0  0  0
 23 34  1  0  0  0  0
M  CHG  2  19  -1  20  -1
M  END
$$$$
RDU17
 OpenBabel09302314563D

 34 35  0  0  1  0  0  0  0  0999 V2000
   -0.7530   -1.8190    1.7560 O   0  0  0  0  0  0  0  0  0  0  0  0
   -0.9360   -1.3180    0.6720 C   0  0  0  0  0  0  0  0  0  0  0  0
   -1.1600   -2.0830   -0.4410 O   0  0  0  0  0  0  0  0  0  0  0  0
   -1.6700   -3.3830   -0.1710 C   0  0  0  0  0  0  0  0  0  0  0  0
   -0.7190    0.0810    0.3050 C   0  0  0  0  0  0  0  0  0  0  0  0
    0.4440    0.7020    1.0150 C   0  0  1  0  0  0  0  0  0  0  0  0
    0.3780    0.4350    2.1160 H   0  0  0  0  0  0  0  0  0  0  0  0
    1.7740    0.2070    0.4590 C   0  0  0  0  0  0  0  0  0  0  0  0
    1.8490   -0.3950   -0.7990 C   0  0  0  0  0  0  0  0  0  0  0  0
    3.0730   -0.8240   -1.3040 C   0  0  0  0  0  0  0  0  0  0  0  0
    4.2070   -0.6350   -0.5160 C   0  0  0  0  0  0  0  0  0  0  0  0
    5.3820   -1.0350   -0.9880 F   0  0  0  0  0  0  0  0  0  0  0  0
    4.1650   -0.0500    0.7470 C   0  0  0  0  0  0  0  0  0  0  0  0
    2.9270    0.3680    1.2300 C   0  0  0  0  0  0  0  0  0  0  0  0
   -1.5480    0.7770   -0.5210 C   0  0  0  0  0  0  0  0  0  0  0  0
   -2.7120    0.2540   -1.2370 C   0  0  0  0  0  0  0  0  0  0  0  0
   -3.8250   -0.2470   -0.1530 C   0  0  0  0  0  3  0  0  0  0  0  0
   -3.3630   -0.9460    0.7420 O   0  5  0  0  0  0  0  0  0  0  0  0
   -4.9600    0.1300   -0.4150 O   0  5  0  0  0  0  0  0  0  0  0  0
   -1.2870    2.1430   -0.7450 N   0  0  0  0  0  0  0  0  0  0  0  0
   -0.3160    2.8520   -0.0230 C   0  0  0  0  0  0  0  0  0  0  0  0
    0.4170    2.1760    0.9370 N   0  0  0  0  0  0  0  0  0  0  0  0
   -0.1590    4.0470   -0.2180 O   0  0  0  0  0  0  0  0  0  0  0  0
   -1.8810   -3.7840   -1.1640 H   0  0  0  0  0  0  0  0  0  0  0  0
   -2.5900   -3.2930    0.4260 H   0  0  0  0  0  0  0  0  0  0  0  0
   -0.9230   -3.9760    0.3620 H   0  0  0  0  0  0  0  0  0  0  0  0
    0.9350   -0.5460   -1.3850 H   0  0  0  0  0  0  0  0  0  0  0  0
    3.1360   -1.2950   -2.2810 H   0  0  0  0  0  0  0  0  0  0  0  0
    5.0650    0.0730    1.3410 H   0  0  0  0  0  0  0  0  0  0  0  0
    2.8620    0.8140    2.2220 H   0  0  0  0  0  0  0  0  0  0  0  0
   -2.5000   -0.6510   -1.8250 H   0  0  0  0  0  0  0  0  0  0  0  0
   -3.2120    0.9650   -1.9060 H   0  0  0  0  0  0  0  0  0  0  0  0
   -1.9450    2.6990   -1.2820 H   0  0  0  0  0  0  0  0  0  0  0  0
    1.2110    2.6680    1.3230 H   0  0  0  0  0  0  0  0  0  0  0  0
  1  2  2  0  0  0  0
  2  3  1  0  0  0  0
  2  5  1  0  0  0  0
  3  4  1  0  0  0  0
  4 24  1  0  0  0  0
  4 25  1  0  0  0  0
  4 26  1  0  0  0  0
  5  6  1  0  0  0  0
  5 15  2  0  0  0  0
  6  7  1  1  0  0  0
  6  8  1  0  0  0  0
  6 22  1  0  0  0  0
  8  9  2  0  0  0  0
  8 14  1  0  0  0  0
  9 10  1  0  0  0  0
  9 27  1  0  0  0  0
 10 11  2  0  0  0  0
 10 28  1  0  0  0  0
 11 12  1  0  0  0  0
 11 13  1  0  0  0  0
 13 14  2  0  0  0  0
 13 29  1  0  0  0  0
 14 30  1  0  0  0  0
 15 16  1  0  0  0  0
 15 20  1  0  0  0  0
 16 17  1  0  0  0  0
 16 31  1  0  0  0  0
 16 32  1  0  0  0  0
 17 18  1  0  0  0  0
 17 19  1  0  0  0  0
 20 21  1  0  0  0  0
 20 33  1  0  0  0  0
 21 22  1  0  0  0  0
 21 23  2  0  0  0  0
 22 34  1  0  0  0  0
M  CHG  2  18  -1  19  -1
M  END
$$$$
RDU18
 OpenBabel09302314563D

 37 38  0  0  1  0  0  0  0  0999 V2000
   -2.2460   -2.8040   -0.7690 O   0  0  0  0  0  0  0  0  0  0  0  0
   -1.5110   -2.1780   -0.0410 C   0  0  0  0  0  0  0  0  0  0  0  0
   -0.3270   -2.7530    0.3790 O   0  0  0  0  0  0  0  0  0  0  0  0
   -0.0510   -4.0360   -0.1570 C   0  0  0  0  0  0  0  0  0  0  0  0
   -1.6630   -0.8650    0.5260 C   0  0  0  0  0  0  0  0  0  0  0  0
   -0.7040   -0.4950    1.6170 C   0  0  1  0  0  0  0  0  0  0  0  0
   -0.5930   -1.3580    2.3380 H   0  0  0  0  0  0  0  0  0  0  0  0
    0.6500   -0.1590    0.9990 C   0  0  0  0  0  0  0  0  0  0  0  0
    0.7840    0.9150    0.1190 C   0  0  0  0  0  0  0  0  0  0  0  0
    2.0230    1.2070   -0.4460 C   0  0  0  0  0  0  0  0  0  0  0  0
    3.1270    0.4180   -0.1240 C   0  0  0  0  0  0  0  0  0  0  0  0
    4.4820    0.7000   -0.6930 C   0  0  0  0  0  0  0  0  0  0  0  0
    4.9820   -0.2960   -1.4310 F   0  0  0  0  0  0  0  0  0  0  0  0
    4.5800    1.7650   -1.4890 F   0  0  0  0  0  0  0  0  0  0  0  0
    5.4230    0.9120    0.2330 F   0  0  0  0  0  0  0  0  0  0  0  0
    2.9950   -0.6700    0.7420 C   0  0  0  0  0  0  0  0  0  0  0  0
    1.7540   -0.9570    1.3020 C   0  0  0  0  0  0  0  0  0  0  0  0
   -2.6300    0.0210    0.0870 C   0  0  0  0  0  0  0  0  0  0  0  0
   -3.5090   -0.2140   -1.0750 C   0  0  0  0  0  0  0  0  0  0  0  0
   -3.7790    1.0780   -1.9710 C   0  0  0  0  0  3  0  0  0  0  0  0
   -3.9710    2.1230   -1.3280 O   0  5  0  0  0  0  0  0  0  0  0  0
   -3.8000    0.8800   -3.1760 O   0  5  0  0  0  0  0  0  0  0  0  0
   -2.8240    1.2040    0.7680 N   0  0  0  0  0  0  0  0  0  0  0  0
   -2.1040    1.5550    1.9190 C   0  0  0  0  0  0  0  0  0  0  0  0
   -1.1870    0.6390    2.4200 N   0  0  0  0  0  0  0  0  0  0  0  0
   -2.3180    2.6000    2.5050 O   0  0  0  0  0  0  0  0  0  0  0  0
    0.9240   -4.2850    0.2710 H   0  0  0  0  0  0  0  0  0  0  0  0
   -0.0030   -3.9840   -1.2500 H   0  0  0  0  0  0  0  0  0  0  0  0
   -0.8200   -4.7500    0.1530 H   0  0  0  0  0  0  0  0  0  0  0  0
   -0.0910    1.5170   -0.1440 H   0  0  0  0  0  0  0  0  0  0  0  0
    2.1060    2.0460   -1.1380 H   0  0  0  0  0  0  0  0  0  0  0  0
    3.8510   -1.3000    0.9790 H   0  0  0  0  0  0  0  0  0  0  0  0
    1.6390   -1.8210    1.9540 H   0  0  0  0  0  0  0  0  0  0  0  0
   -4.5100   -0.5640   -0.7660 H   0  0  0  0  0  0  0  0  0  0  0  0
   -3.1170   -1.0030   -1.7500 H   0  0  0  0  0  0  0  0  0  0  0  0
   -3.4590    1.9470    0.3360 H   0  0  0  0  0  0  0  0  0  0  0  0
   -0.6000    0.9490    3.1800 H   0  0  0  0  0  0  0  0  0  0  0  0
  1  2  2  0  0  0  0
  2  3  1  0  0  0  0
  2  5  1  0  0  0  0
  3  4  1  0  0  0  0
  4 27  1  0  0  0  0
  4 28  1  0  0  0  0
  4 29  1  0  0  0  0
  5  6  1  0  0  0  0
  5 18  2  0  0  0  0
  6  7  1  1  0  0  0
  6  8  1  0  0  0  0
  6 25  1  0  0  0  0
  8  9  2  0  0  0  0
  8 17  1  0  0  0  0
  9 10  1  0  0  0  0
  9 30  1  0  0  0  0
 10 11  2  0  0  0  0
 10 31  1  0  0  0  0
 11 12  1  0  0  0  0
 11 16  1  0  0  0  0
 12 13  1  0  0  0  0
 12 14  1  0  0  0  0
 12 15  1  0  0  0  0
 16 17  2  0  0  0  0
 16 32  1  0  0  0  0
 17 33  1  0  0  0  0
 18 19  1  0  0  0  0
 18 23  1  0  0  0  0
 19 20  1  0  0  0  0
 19 34  1  0  0  0  0
 19 35  1  0  0  0  0
 20 21  1  0  0  0  0
 20 22  1  0  0  0  0
 23 24  1  0  0  0  0
 23 36  1  0  0  0  0
 24 25  1  0  0  0  0
 24 26  2  0  0  0  0
 25 37  1  0  0  0  0
M  CHG  2  21  -1  22  -1
M  END
$$$$
RDU19
 OpenBabel09302314563D

 42 43  0  0  1  0  0  0  0  0999 V2000
    0.3260   -2.4110    1.7290 O   0  0  0  0  0  0  0  0  0  0  0  0
    0.9740   -1.8260    0.8840 C   0  0  0  0  0  0  0  0  0  0  0  0
    1.5700   -2.5320   -0.1260 O   0  0  0  0  0  0  0  0  0  0  0  0
    1.3890   -3.9400   -0.0810 C   0  0  0  0  0  0  0  0  0  0  0  0
    1.1950   -0.4060    0.7810 C   0  0  0  0  0  0  0  0  0  0  0  0
    0.2340    0.3840    1.6270 C   0  0  2  0  0  0  0  0  0  0  0  0
    0.1760   -0.0770    2.6590 H   0  0  0  0  0  0  0  0  0  0  0  0
   -1.1420    0.3490    0.9760 C   0  0  0  0  0  0  0  0  0  0  0  0
   -1.4480    1.1600   -0.1130 C   0  0  0  0  0  0  0  0  0  0  0  0
   -2.7010    1.0910   -0.7160 C   0  0  0  0  0  0  0  0  0  0  0  0
   -3.6610    0.1970   -0.2270 C   0  0  0  0  0  0  0  0  0  0  0  0
   -5.0000    0.1080   -0.7350 N   0  0  0  0  0  0  0  0  0  0  0  0
   -5.2370   -1.1710   -1.4420 C   0  0  0  0  0  0  0  0  0  0  0  0
   -5.4260    1.2540   -1.5610 C   0  0  0  0  0  0  0  0  0  0  0  0
   -3.3490   -0.6290    0.8660 C   0  0  0  0  0  0  0  0  0  0  0  0
   -2.0950   -0.5510    1.4570 C   0  0  0  0  0  0  0  0  0  0  0  0
    2.1480    0.2130   -0.0020 C   0  0  0  0  0  0  0  0  0  0  0  0
    3.0720   -0.5350   -0.8860 C   0  0  0  0  0  0  0  0  0  0  0  0
    4.3500    0.1970   -1.4650 C   0  0  0  0  0  3  0  0  0  0  0  0
    5.2520   -0.5610   -1.8030 O   0  5  0  0  0  0  0  0  0  0  0  0
    4.2920    1.4350   -1.5500 O   0  5  0  0  0  0  0  0  0  0  0  0
    2.2360    1.5870    0.0040 N   0  0  0  0  0  0  0  0  0  0  0  0
    1.5070    2.3940    0.8910 C   0  0  0  0  0  0  0  0  0  0  0  0
    0.6900    1.7700    1.8270 N   0  0  0  0  0  0  0  0  0  0  0  0
    1.6280    3.6060    0.8800 O   0  0  0  0  0  0  0  0  0  0  0  0
    1.9550   -4.2870   -0.9520 H   0  0  0  0  0  0  0  0  0  0  0  0
    0.3270   -4.1870   -0.1650 H   0  0  0  0  0  0  0  0  0  0  0  0
    1.7960   -4.3470    0.8500 H   0  0  0  0  0  0  0  0  0  0  0  0
   -0.6980    1.8470   -0.5130 H   0  0  0  0  0  0  0  0  0  0  0  0
   -2.9140    1.7230   -1.5710 H   0  0  0  0  0  0  0  0  0  0  0  0
   -4.9500   -2.0120   -0.7880 H   0  0  0  0  0  0  0  0  0  0  0  0
   -4.6770   -1.2640   -2.3860 H   0  0  0  0  0  0  0  0  0  0  0  0
   -6.3130   -1.2680   -1.6550 H   0  0  0  0  0  0  0  0  0  0  0  0
   -5.2460    2.1890   -1.0020 H   0  0  0  0  0  0  0  0  0  0  0  0
   -6.5120    1.1790   -1.7300 H   0  0  0  0  0  0  0  0  0  0  0  0
   -4.9260    1.3250   -2.5390 H   0  0  0  0  0  0  0  0  0  0  0  0
   -4.0930   -1.3200    1.2510 H   0  0  0  0  0  0  0  0  0  0  0  0
   -1.8430   -1.2150    2.2870 H   0  0  0  0  0  0  0  0  0  0  0  0
    2.5320   -0.9110   -1.7780 H   0  0  0  0  0  0  0  0  0  0  0  0
    3.4530   -1.4450   -0.3730 H   0  0  0  0  0  0  0  0  0  0  0  0
    2.9800    2.0660   -0.5910 H   0  0  0  0  0  0  0  0  0  0  0  0
    0.0680    2.3720    2.3510 H   0  0  0  0  0  0  0  0  0  0  0  0
  1  2  2  0  0  0  0
  2  3  1  0  0  0  0
  2  5  1  0  0  0  0
  3  4  1  0  0  0  0
  4 26  1  0  0  0  0
  4 27  1  0  0  0  0
  4 28  1  0  0  0  0
  5  6  1  0  0  0  0
  5 17  2  0  0  0  0
  6  7  1  1  0  0  0
  6  8  1  0  0  0  0
  6 24  1  0  0  0  0
  8  9  2  0  0  0  0
  8 16  1  0  0  0  0
  9 10  1  0  0  0  0
  9 29  1  0  0  0  0
 10 11  2  0  0  0  0
 10 30  1  0  0  0  0
 11 12  1  0  0  0  0
 11 15  1  0  0  0  0
 12 13  1  0  0  0  0
 12 14  1  0  0  0  0
 13 31  1  0  0  0  0
 13 32  1  0  0  0  0
 13 33  1  0  0  0  0
 14 34  1  0  0  0  0
 14 35  1  0  0  0  0
 14 36  1  0  0  0  0
 15 16  2  0  0  0  0
 15 37  1  0  0  0  0
 16 38  1  0  0  0  0
 17 18  1  0  0  0  0
 17 22  1  0  0  0  0
 18 19  1  0  0  0  0
 18 39  1  0  0  0  0
 18 40  1  0  0  0  0
 19 20  1  0  0  0  0
 19 21  1  0  0  0  0
 22 23  1  0  0  0  0
 22 41  1  0  0  0  0
 23 24  1  0  0  0  0
 23 25  2  0  0  0  0
 24 42  1  0  0  0  0
M  CHG  2  20  -1  21  -1
M  END
$$$$
RDU20
 OpenBabel09302314563D

 34 35  0  0  1  0  0  0  0  0999 V2000
   -2.0020   -2.7510   -0.5800 O   0  0  0  0  0  0  0  0  0  0  0  0
   -1.3850   -2.0590    0.1960 C   0  0  0  0  0  0  0  0  0  0  0  0
   -0.2940   -2.5980    0.8540 O   0  0  0  0  0  0  0  0  0  0  0  0
    0.0250   -3.9340    0.5050 C   0  0  0  0  0  0  0  0  0  0  0  0
   -1.5920   -0.6910    0.5850 C   0  0  0  0  0  0  0  0  0  0  0  0
   -0.6450   -0.1370    1.6070 C   0  0  1  0  0  0  0  0  0  0  0  0
   -0.5660   -0.8480    2.4820 H   0  0  0  0  0  0  0  0  0  0  0  0
    0.7270    0.0540    0.9700 C   0  0  0  0  0  0  0  0  0  0  0  0
    0.9040    0.9740   -0.0650 C   0  0  0  0  0  0  0  0  0  0  0  0
    2.1560    1.1350   -0.6550 C   0  0  0  0  0  0  0  0  0  0  0  0
    3.2100    0.3570   -0.1930 C   0  0  0  0  0  0  0  0  0  0  0  0
    4.9300    0.5700   -0.9900 Br  0  0  0  0  0  0  0  0  0  0  0  0
    3.0580   -0.5750    0.8250 C   0  0  0  0  0  0  0  0  0  0  0  0
    1.8000   -0.7230    1.4070 C   0  0  0  0  0  0  0  0  0  0  0  0
   -2.5960    0.0830    0.0260 C   0  0  0  0  0  0  0  0  0  0  0  0
   -3.5040   -0.4420   -1.0180 C   0  0  0  0  0  0  0  0  0  0  0  0
   -4.6010    0.4950   -1.6610 C   0  0  0  0  0  3  0  0  0  0  0  0
   -5.3650   -0.0840   -2.4250 O   0  5  0  0  0  0  0  0  0  0  0  0
   -4.5750    1.6960   -1.3440 O   0  5  0  0  0  0  0  0  0  0  0  0
   -2.7540    1.3820    0.4410 N   0  0  0  0  0  0  0  0  0  0  0  0
   -2.0130    1.9500    1.4900 C   0  0  0  0  0  0  0  0  0  0  0  0
   -1.1170    1.1370    2.1740 N   0  0  0  0  0  0  0  0  0  0  0  0
   -2.1900    3.1040    1.8320 O   0  0  0  0  0  0  0  0  0  0  0  0
    0.9060   -4.1520    1.1150 H   0  0  0  0  0  0  0  0  0  0  0  0
    0.2540   -4.0000   -0.5640 H   0  0  0  0  0  0  0  0  0  0  0  0
   -0.8090   -4.5990    0.7520 H   0  0  0  0  0  0  0  0  0  0  0  0
    0.0530    1.5610   -0.4230 H   0  0  0  0  0  0  0  0  0  0  0  0
    2.2870    1.8520   -1.4640 H   0  0  0  0  0  0  0  0  0  0  0  0
    3.8880   -1.1870    1.1660 H   0  0  0  0  0  0  0  0  0  0  0  0
    1.6510   -1.4670    2.1890 H   0  0  0  0  0  0  0  0  0  0  0  0
   -4.0510   -1.3340   -0.6380 H   0  0  0  0  0  0  0  0  0  0  0  0
   -2.9220   -0.8430   -1.8770 H   0  0  0  0  0  0  0  0  0  0  0  0
   -3.4950    1.9980   -0.0180 H   0  0  0  0  0  0  0  0  0  0  0  0
   -0.5030    1.5950    2.8320 H   0  0  0  0  0  0  0  0  0  0  0  0
  1  2  2  0  0  0  0
  2  3  1  0  0  0  0
  2  5  1  0  0  0  0
  3  4  1  0  0  0  0
  4 24  1  0  0  0  0
  4 25  1  0  0  0  0
  4 26  1  0  0  0  0
  5  6  1  0  0  0  0
  5 15  2  0  0  0  0
  6  7  1  1  0  0  0
  6  8  1  0  0  0  0
  6 22  1  0  0  0  0
  8  9  2  0  0  0  0
  8 14  1  0  0  0  0
  9 10  1  0  0  0  0
  9 27  1  0  0  0  0
 10 11  2  0  0  0  0
 10 28  1  0  0  0  0
 11 12  1  0  0  0  0
 11 13  1  0  0  0  0
 13 14  2  0  0  0  0
 13 29  1  0  0  0  0
 14 30  1  0  0  0  0
 15 16  1  0  0  0  0
 15 20  1  0  0  0  0
 16 17  1  0  0  0  0
 16 31  1  0  0  0  0
 16 32  1  0  0  0  0
 17 18  1  0  0  0  0
 17 19  1  0  0  0  0
 20 21  1  0  0  0  0
 20 33  1  0  0  0  0
 21 22  1  0  0  0  0
 21 23  2  0  0  0  0
 22 34  1  0  0  0  0
M  CHG  2  18  -1  19  -1
M  END
$$$$
RDU21
 OpenBabel09302314563D

 33 34  0  0  1  0  0  0  0  0999 V2000
   -0.1610    2.2570   -2.2120 O   0  0  0  0  0  0  0  0  0  0  0  0
    0.1920    1.6960   -1.2010 C   0  0  0  0  0  0  0  0  0  0  0  0
    0.4860    2.4060   -0.0720 O   0  0  0  0  0  0  0  0  0  0  0  0
    0.4590    3.8190   -0.1950 C   0  0  0  0  0  0  0  0  0  0  0  0
    0.2930    0.2730   -0.9370 C   0  0  0  0  0  0  0  0  0  0  0  0
   -0.9800   -0.4670   -1.2020 C   0  0  2  0  0  0  0  0  0  0  0  0
   -1.4320   -0.1180   -2.1810 H   0  0  0  0  0  0  0  0  0  0  0  0
   -2.0020   -0.2130   -0.0820 C   0  0  0  0  0  0  0  0  0  0  0  0
   -3.2720   -0.5460   -0.3870 N   0  0  0  0  0  0  0  0  0  0  0  0
   -4.2270   -0.3610    0.5430 C   0  0  0  0  0  0  0  0  0  0  0  0
   -3.9530    0.1630    1.8120 C   0  0  0  0  0  0  0  0  0  0  0  0
   -2.6350    0.4990    2.1210 C   0  0  0  0  0  0  0  0  0  0  0  0
   -1.6410    0.3100    1.1670 C   0  0  0  0  0  0  0  0  0  0  0  0
   -0.7590   -1.9150   -1.3200 N   0  0  0  0  0  0  0  0  0  0  0  0
    1.4250   -0.3640   -0.4950 C   0  0  0  0  0  0  0  0  0  0  0  0
    2.7260    0.2950   -0.2490 C   0  0  0  0  0  0  0  0  0  0  0  0
    3.4430   -0.1940    1.0930 C   0  0  0  0  0  3  0  0  0  0  0  0
    3.3870   -1.4190    1.2830 O   0  5  0  0  0  0  0  0  0  0  0  0
    3.9950    0.6860    1.7370 O   0  5  0  0  0  0  0  0  0  0  0  0
    1.4120   -1.7370   -0.3260 N   0  0  0  0  0  0  0  0  0  0  0  0
    0.3070   -2.5300   -0.6650 C   0  0  0  0  0  0  0  0  0  0  0  0
    0.3170   -3.7350   -0.4910 O   0  0  0  0  0  0  0  0  0  0  0  0
    0.7740    4.1590    0.7980 H   0  0  0  0  0  0  0  0  0  0  0  0
    1.1600    4.1490   -0.9680 H   0  0  0  0  0  0  0  0  0  0  0  0
   -0.5530    4.1570   -0.4340 H   0  0  0  0  0  0  0  0  0  0  0  0
   -5.2390   -0.6470    0.2470 H   0  0  0  0  0  0  0  0  0  0  0  0
   -4.7480    0.3000    2.5340 H   0  0  0  0  0  0  0  0  0  0  0  0
   -2.3850    0.9040    3.1010 H   0  0  0  0  0  0  0  0  0  0  0  0
   -0.5980    0.5680    1.3770 H   0  0  0  0  0  0  0  0  0  0  0  0
   -1.5930   -2.4750   -1.4580 H   0  0  0  0  0  0  0  0  0  0  0  0
    3.4500    0.0600   -1.0490 H   0  0  0  0  0  0  0  0  0  0  0  0
    2.6570    1.3930   -0.1980 H   0  0  0  0  0  0  0  0  0  0  0  0
    2.2090   -2.1840    0.2210 H   0  0  0  0  0  0  0  0  0  0  0  0
  1  2  2  0  0  0  0
  2  3  1  0  0  0  0
  2  5  1  0  0  0  0
  3  4  1  0  0  0  0
  4 23  1  0  0  0  0
  4 24  1  0  0  0  0
  4 25  1  0  0  0  0
  5  6  1  0  0  0  0
  5 15  2  0  0  0  0
  6  7  1  6  0  0  0
  6  8  1  0  0  0  0
  6 14  1  0  0  0  0
  8  9  2  0  0  0  0
  8 13  1  0  0  0  0
  9 10  1  0  0  0  0
 10 11  2  0  0  0  0
 10 26  1  0  0  0  0
 11 12  1  0  0  0  0
 11 27  1  0  0  0  0
 12 13  2  0  0  0  0
 12 28  1  0  0  0  0
 13 29  1  0  0  0  0
 14 21  1  0  0  0  0
 14 30  1  0  0  0  0
 15 16  1  0  0  0  0
 15 20  1  0  0  0  0
 16 17  1  0  0  0  0
 16 31  1  0  0  0  0
 16 32  1  0  0  0  0
 17 18  1  0  0  0  0
 17 19  1  0  0  0  0
 20 21  1  0  0  0  0
 20 33  1  0  0  0  0
 21 22  2  0  0  0  0
M  CHG  2  18  -1  19  -1
M  END
$$$$
RDU22
 OpenBabel09302314563D

 31 32  0  0  1  0  0  0  0  0999 V2000
    0.5880   -2.0180    1.5960 O   0  0  0  0  0  0  0  0  0  0  0  0
    0.7640   -1.3920    0.5750 C   0  0  0  0  0  0  0  0  0  0  0  0
    1.2100   -2.0030   -0.5620 O   0  0  0  0  0  0  0  0  0  0  0  0
    1.9190   -3.2160   -0.3410 C   0  0  0  0  0  0  0  0  0  0  0  0
    0.3600   -0.0100    0.3310 C   0  0  0  0  0  0  0  0  0  0  0  0
   -0.8810    0.3770    1.0820 C   0  0  2  0  0  0  0  0  0  0  0  0
   -0.8050   -0.0180    2.1450 H   0  0  0  0  0  0  0  0  0  0  0  0
   -2.0950   -0.2010    0.4150 C   0  0  0  0  0  0  0  0  0  0  0  0
   -3.1010   -0.9070    1.0110 C   0  0  0  0  0  0  0  0  0  0  0  0
   -4.1200   -1.3230    0.0900 C   0  0  0  0  0  0  0  0  0  0  0  0
   -3.8770   -0.9310   -1.1950 C   0  0  0  0  0  0  0  0  0  0  0  0
   -2.3850   -0.0550   -1.2970 S   0  0  0  0  0  0  0  0  0  0  0  0
   -1.0330    1.8400    1.1930 N   0  0  0  0  0  0  0  0  0  0  0  0
    1.0860    0.8790   -0.4030 C   0  0  0  0  0  0  0  0  0  0  0  0
    2.3090    0.6120   -1.1600 C   0  0  0  0  0  0  0  0  0  0  0  0
    3.5060    0.1970   -0.1310 C   0  0  0  0  0  3  0  0  0  0  0  0
    4.5790    0.7180   -0.4110 O   0  5  0  0  0  0  0  0  0  0  0  0
    3.1640   -0.5860    0.7460 O   0  5  0  0  0  0  0  0  0  0  0  0
    0.6440    2.2160   -0.4710 N   0  0  0  0  0  0  0  0  0  0  0  0
   -0.3910    2.7140    0.3340 C   0  0  0  0  0  0  0  0  0  0  0  0
   -0.6840    3.8980    0.2930 O   0  0  0  0  0  0  0  0  0  0  0  0
    2.2660   -3.4890   -1.3400 H   0  0  0  0  0  0  0  0  0  0  0  0
    1.2550   -3.9710    0.0850 H   0  0  0  0  0  0  0  0  0  0  0  0
    2.7660   -3.0190    0.3340 H   0  0  0  0  0  0  0  0  0  0  0  0
   -3.1430   -1.1570    2.0590 H   0  0  0  0  0  0  0  0  0  0  0  0
   -4.9770   -1.8910    0.4100 H   0  0  0  0  0  0  0  0  0  0  0  0
   -4.4870   -1.1200   -2.0560 H   0  0  0  0  0  0  0  0  0  0  0  0
   -1.8670    2.1800    1.6500 H   0  0  0  0  0  0  0  0  0  0  0  0
    2.6820    1.4520   -1.7590 H   0  0  0  0  0  0  0  0  0  0  0  0
    2.2360   -0.2520   -1.8360 H   0  0  0  0  0  0  0  0  0  0  0  0
    1.2200    2.9080   -0.9410 H   0  0  0  0  0  0  0  0  0  0  0  0
  1  2  2  0  0  0  0
  2  3  1  0  0  0  0
  2  5  1  0  0  0  0
  3  4  1  0  0  0  0
  4 22  1  0  0  0  0
  4 23  1  0  0  0  0
  4 24  1  0  0  0  0
  5  6  1  0  0  0  0
  5 14  2  0  0  0  0
  6  7  1  1  0  0  0
  6  8  1  0  0  0  0
  6 13  1  0  0  0  0
  8  9  2  0  0  0  0
  8 12  1  0  0  0  0
  9 10  1  0  0  0  0
  9 25  1  0  0  0  0
 10 11  2  0  0  0  0
 10 26  1  0  0  0  0
 11 12  1  0  0  0  0
 11 27  1  0  0  0  0
 13 20  1  0  0  0  0
 13 28  1  0  0  0  0
 14 15  1  0  0  0  0
 14 19  1  0  0  0  0
 15 16  1  0  0  0  0
 15 29  1  0  0  0  0
 15 30  1  0  0  0  0
 16 17  1  0  0  0  0
 16 18  1  0  0  0  0
 19 20  1  0  0  0  0
 19 31  1  0  0  0  0
 20 21  2  0  0  0  0
M  CHG  2  17  -1  18  -1
M  END
$$$$
RDU23
 OpenBabel09302314563D

 38 40  0  0  1  0  0  0  0  0999 V2000
    0.3680   -3.0420   -0.3030 O   0  0  0  0  0  0  0  0  0  0  0  0
    1.1960   -2.1570   -0.2680 C   0  0  0  0  0  0  0  0  0  0  0  0
    2.4890   -2.4550    0.0940 O   0  0  0  0  0  0  0  0  0  0  0  0
    2.7150   -3.7910    0.5130 C   0  0  0  0  0  0  0  0  0  0  0  0
    1.0400   -0.7760   -0.6210 C   0  0  0  0  0  0  0  0  0  0  0  0
   -0.2980   -0.4190   -1.2120 C   0  0  1  0  0  0  0  0  0  0  0  0
   -0.7770   -1.3240   -1.6830 H   0  0  0  0  0  0  0  0  0  0  0  0
   -1.1960    0.1470   -0.1570 C   0  0  0  0  0  0  0  0  0  0  0  0
   -0.8330    1.0220    0.8560 C   0  0  0  0  0  0  0  0  0  0  0  0
   -1.9520    1.3340    1.6290 N   0  0  0  0  0  0  0  0  0  0  0  0
   -3.0510    0.6450    1.1140 C   0  0  0  0  0  0  0  0  0  0  0  0
   -2.6000   -0.1170   -0.0150 C   0  0  0  0  0  0  0  0  0  0  0  0
   -3.5160   -0.9150   -0.7030 C   0  0  0  0  0  0  0  0  0  0  0  0
   -4.8350   -0.9330   -0.2820 C   0  0  0  0  0  0  0  0  0  0  0  0
   -5.2640   -0.1700    0.8220 C   0  0  0  0  0  0  0  0  0  0  0  0
   -4.3850    0.6250    1.5360 C   0  0  0  0  0  0  0  0  0  0  0  0
   -0.1090    0.5810   -2.2910 N   0  0  0  0  0  0  0  0  0  0  0  0
    1.9670    0.2280   -0.4410 C   0  0  0  0  0  0  0  0  0  0  0  0
    3.1210    0.1880    0.4800 C   0  0  0  0  0  0  0  0  0  0  0  0
    3.1240    1.4420    1.4650 C   0  0  0  0  0  3  0  0  0  0  0  0
    3.6910    1.2660    2.5320 O   0  5  0  0  0  0  0  0  0  0  0  0
    2.5550    2.4500    1.0120 O   0  5  0  0  0  0  0  0  0  0  0  0
    1.8270    1.4120   -1.1450 N   0  0  0  0  0  0  0  0  0  0  0  0
    0.8050    1.6110   -2.0980 C   0  0  0  0  0  0  0  0  0  0  0  0
    0.7860    2.6160   -2.7850 O   0  0  0  0  0  0  0  0  0  0  0  0
    3.7740   -3.7910    0.7880 H   0  0  0  0  0  0  0  0  0  0  0  0
    2.5150   -4.4840   -0.3090 H   0  0  0  0  0  0  0  0  0  0  0  0
    2.0780   -4.0330    1.3700 H   0  0  0  0  0  0  0  0  0  0  0  0
    0.1400    1.4490    1.0870 H   0  0  0  0  0  0  0  0  0  0  0  0
   -1.9630    1.9340    2.4190 H   0  0  0  0  0  0  0  0  0  0  0  0
   -3.1860   -1.5180   -1.5460 H   0  0  0  0  0  0  0  0  0  0  0  0
   -5.5620   -1.5490   -0.8040 H   0  0  0  0  0  0  0  0  0  0  0  0
   -6.3100   -0.2150    1.1150 H   0  0  0  0  0  0  0  0  0  0  0  0
   -4.7120    1.2080    2.3880 H   0  0  0  0  0  0  0  0  0  0  0  0
   -0.9180    0.7970   -2.8550 H   0  0  0  0  0  0  0  0  0  0  0  0
    4.0890    0.2120   -0.0430 H   0  0  0  0  0  0  0  0  0  0  0  0
    3.1380   -0.7170    1.1160 H   0  0  0  0  0  0  0  0  0  0  0  0
    2.2910    2.2770   -0.7400 H   0  0  0  0  0  0  0  0  0  0  0  0
  1  2  2  0  0  0  0
  2  3  1  0  0  0  0
  2  5  1  0  0  0  0
  3  4  1  0  0  0  0
  4 26  1  0  0  0  0
  4 27  1  0  0  0  0
  4 28  1  0  0  0  0
  5  6  1  0  0  0  0
  5 18  2  0  0  0  0
  6  7  1  6  0  0  0
  6  8  1  0  0  0  0
  6 17  1  0  0  0  0
  8  9  2  0  0  0  0
  8 12  1  0  0  0  0
  9 10  1  0  0  0  0
  9 29  1  0  0  0  0
 10 11  1  0  0  0  0
 10 30  1  0  0  0  0
 11 12  2  0  0  0  0
 11 16  1  0  0  0  0
 12 13  1  0  0  0  0
 13 14  2  0  0  0  0
 13 31  1  0  0  0  0
 14 15  1  0  0  0  0
 14 32  1  0  0  0  0
 15 16  2  0  0  0  0
 15 33  1  0  0  0  0
 16 34  1  0  0  0  0
 17 24  1  0  0  0  0
 17 35  1  0  0  0  0
 18 19  1  0  0  0  0
 18 23  1  0  0  0  0
 19 20  1  0  0  0  0
 19 36  1  0  0  0  0
 19 37  1  0  0  0  0
 20 21  1  0  0  0  0
 20 22  1  0  0  0  0
 23 24  1  0  0  0  0
 23 38  1  0  0  0  0
 24 25  2  0  0  0  0
M  CHG  2  21  -1  22  -1
M  END
$$$$
RDU24
 OpenBabel09302314563D

 38 39  0  0  1  0  0  0  0  0999 V2000
   -0.6150    3.0050   -1.0560 O   0  0  0  0  0  0  0  0  0  0  0  0
   -1.2820    2.1260   -0.5430 C   0  0  0  0  0  0  0  0  0  0  0  0
   -2.2610    2.4560    0.3570 O   0  0  0  0  0  0  0  0  0  0  0  0
   -2.3920    3.8410    0.6420 C   0  0  0  0  0  0  0  0  0  0  0  0
   -1.1760    0.7140   -0.7710 C   0  0  0  0  0  0  0  0  0  0  0  0
   -0.0940    0.3560   -1.7580 C   0  0  1  0  0  0  0  0  0  0  0  0
   -0.1230    1.0730   -2.6330 H   0  0  0  0  0  0  0  0  0  0  0  0
    1.2390    0.5070   -1.0530 C   0  0  0  0  0  0  0  0  0  0  0  0
    1.9860   -0.5090   -0.6100 C   0  0  0  0  0  0  0  0  0  0  0  0
    3.2460   -0.3180    0.1040 C   0  0  0  0  0  0  0  0  0  0  0  0
    3.5330   -1.1220    1.2140 C   0  0  0  0  0  0  0  0  0  0  0  0
    4.7290   -0.9560    1.9060 C   0  0  0  0  0  0  0  0  0  0  0  0
    5.6500    0.0070    1.4940 C   0  0  0  0  0  0  0  0  0  0  0  0
    5.3680    0.8080    0.3890 C   0  0  0  0  0  0  0  0  0  0  0  0
    4.1710    0.6480   -0.3040 C   0  0  0  0  0  0  0  0  0  0  0  0
   -0.2970   -0.9880   -2.3220 N   0  0  0  0  0  0  0  0  0  0  0  0
   -1.9320   -0.2770   -0.1720 C   0  0  0  0  0  0  0  0  0  0  0  0
   -2.9520   -0.0080    0.8780 C   0  0  0  0  0  0  0  0  0  0  0  0
   -3.5960   -1.2320    1.6090 C   0  0  0  0  0  3  0  0  0  0  0  0
   -3.3200   -2.3790    1.1670 O   0  5  0  0  0  0  0  0  0  0  0  0
   -4.3310   -0.9600    2.5480 O   0  5  0  0  0  0  0  0  0  0  0  0
   -1.7700   -1.5840   -0.5330 N   0  0  0  0  0  0  0  0  0  0  0  0
   -0.9360   -1.9840   -1.5800 C   0  0  0  0  0  0  0  0  0  0  0  0
   -0.8130   -3.1540   -1.8930 O   0  0  0  0  0  0  0  0  0  0  0  0
   -3.2040    3.8640    1.3760 H   0  0  0  0  0  0  0  0  0  0  0  0
   -2.6550    4.3920   -0.2660 H   0  0  0  0  0  0  0  0  0  0  0  0
   -1.4600    4.2320    1.0610 H   0  0  0  0  0  0  0  0  0  0  0  0
    1.5160    1.5520   -0.8960 H   0  0  0  0  0  0  0  0  0  0  0  0
    1.6770   -1.5510   -0.7310 H   0  0  0  0  0  0  0  0  0  0  0  0
    2.8110   -1.8700    1.5390 H   0  0  0  0  0  0  0  0  0  0  0  0
    4.9460   -1.5770    2.7710 H   0  0  0  0  0  0  0  0  0  0  0  0
    6.5820    0.1340    2.0350 H   0  0  0  0  0  0  0  0  0  0  0  0
    6.0840    1.5600    0.0690 H   0  0  0  0  0  0  0  0  0  0  0  0
    3.9520    1.2760   -1.1650 H   0  0  0  0  0  0  0  0  0  0  0  0
    0.3900   -1.3010   -2.9940 H   0  0  0  0  0  0  0  0  0  0  0  0
   -3.7980    0.5710    0.4510 H   0  0  0  0  0  0  0  0  0  0  0  0
   -2.5300    0.6470    1.6720 H   0  0  0  0  0  0  0  0  0  0  0  0
   -2.3810   -2.3620    0.0540 H   0  0  0  0  0  0  0  0  0  0  0  0
  1  2  2  0  0  0  0
  2  3  1  0  0  0  0
  2  5  1  0  0  0  0
  3  4  1  0  0  0  0
  4 25  1  0  0  0  0
  4 26  1  0  0  0  0
  4 27  1  0  0  0  0
  5  6  1  0  0  0  0
  5 17  2  0  0  0  0
  6  7  1  6  0  0  0
  6  8  1  0  0  0  0
  6 16  1  0  0  0  0
  8  9  2  0  0  0  0
  8 28  1  0  0  0  0
  9 10  1  0  0  0  0
  9 29  1  0  0  0  0
 10 11  2  0  0  0  0
 10 15  1  0  0  0  0
 11 12  1  0  0  0  0
 11 30  1  0  0  0  0
 12 13  2  0  0  0  0
 12 31  1  0  0  0  0
 13 14  1  0  0  0  0
 13 32  1  0  0  0  0
 14 15  2  0  0  0  0
 14 33  1  0  0  0  0
 15 34  1  0  0  0  0
 16 23  1  0  0  0  0
 16 35  1  0  0  0  0
 17 18  1  0  0  0  0
 17 22  1  0  0  0  0
 18 19  1  0  0  0  0
 18 36  1  0  0  0  0
 18 37  1  0  0  0  0
 19 20  1  0  0  0  0
 19 21  1  0  0  0  0
 22 23  1  0  0  0  0
 22 38  1  0  0  0  0
 23 24  2  0  0  0  0
M  CHG  2  20  -1  21  -1
M  END
$$$$
RDU25
 OpenBabel09302314563D

 52 54  0  0  1  0  0  0  0  0999 V2000
    3.6760    0.8680   -2.6720 O   0  0  0  0  0  0  0  0  0  0  0  0
    3.3320    1.2490   -1.5760 C   0  0  0  0  0  0  0  0  0  0  0  0
    2.5900    2.4110   -1.4740 O   0  0  0  0  0  0  0  0  0  0  0  0
    2.2600    3.0300   -2.7060 C   0  0  0  0  0  0  0  0  0  0  0  0
    3.5710    0.6760   -0.2800 C   0  0  0  0  0  0  0  0  0  0  0  0
    2.9890    1.4090    0.8930 C   0  0  1  0  0  0  0  0  0  0  0  0
    3.2570    2.5050    0.8320 H   0  0  0  0  0  0  0  0  0  0  0  0
    1.4750    1.2410    0.8900 C   0  0  0  0  0  0  0  0  0  0  0  0
    0.6610    2.3500    0.6630 C   0  0  0  0  0  0  0  0  0  0  0  0
   -0.7230    2.2060    0.6330 C   0  0  0  0  0  0  0  0  0  0  0  0
   -1.3010    0.9450    0.8190 C   0  0  0  0  0  0  0  0  0  0  0  0
   -2.7550    0.8110    0.7650 C   0  0  0  0  0  0  0  0  0  0  0  0
   -3.3690   -0.2230    0.1690 C   0  0  0  0  0  0  0  0  0  0  0  0
   -4.8200   -0.3590    0.0960 C   0  0  0  0  0  0  0  0  0  0  0  0
   -5.6370   -0.0010    1.1790 C   0  0  0  0  0  0  0  0  0  0  0  0
   -7.0150   -0.1310    1.0990 C   0  0  0  0  0  0  0  0  0  0  0  0
   -7.5780   -0.6250   -0.0870 C   0  0  0  0  0  0  0  0  0  0  0  0
   -8.9380   -0.6980   -0.0380 O   0  0  0  0  0  0  0  0  0  0  0  0
   -9.6010   -1.2040   -1.1870 C   0  0  0  0  0  0  0  0  0  0  0  0
   -6.7880   -0.9930   -1.1750 C   0  0  0  0  0  0  0  0  0  0  0  0
   -5.4050   -0.8590   -1.0700 C   0  0  0  0  0  0  0  0  0  0  0  0
   -0.4810   -0.1640    1.0460 C   0  0  0  0  0  0  0  0  0  0  0  0
    0.9020   -0.0160    1.0800 C   0  0  0  0  0  0  0  0  0  0  0  0
    4.2700   -0.5100   -0.1240 C   0  0  0  0  0  0  0  0  0  0  0  0
    4.8010   -1.2680   -1.2800 C   0  0  0  0  0  0  0  0  0  0  0  0
    5.5540   -2.6370   -1.0540 C   0  0  0  0  0  3  0  0  0  0  0  0
    6.0460   -3.1090   -2.0730 O   0  5  0  0  0  0  0  0  0  0  0  0
    5.5630   -3.0950    0.1000 O   0  5  0  0  0  0  0  0  0  0  0  0
    4.4740   -1.0110    1.1380 N   0  0  0  0  0  0  0  0  0  0  0  0
    4.0940   -0.3300    2.3060 C   0  0  0  0  0  0  0  0  0  0  0  0
    3.5460    0.9410    2.1750 N   0  0  0  0  0  0  0  0  0  0  0  0
    4.2950   -0.8100    3.4060 O   0  0  0  0  0  0  0  0  0  0  0  0
    1.6730    3.9010   -2.4030 H   0  0  0  0  0  0  0  0  0  0  0  0
    3.1710    3.3230   -3.2390 H   0  0  0  0  0  0  0  0  0  0  0  0
    1.6670    2.3460   -3.3240 H   0  0  0  0  0  0  0  0  0  0  0  0
    1.1090    3.3260    0.4830 H   0  0  0  0  0  0  0  0  0  0  0  0
   -1.3540    3.0700    0.4480 H   0  0  0  0  0  0  0  0  0  0  0  0
   -3.3180    1.6240    1.2240 H   0  0  0  0  0  0  0  0  0  0  0  0
   -2.7980   -1.0180   -0.3190 H   0  0  0  0  0  0  0  0  0  0  0  0
   -5.1810    0.3750    2.0960 H   0  0  0  0  0  0  0  0  0  0  0  0
   -7.6570    0.1400    1.9320 H   0  0  0  0  0  0  0  0  0  0  0  0
  -10.6560   -1.1620   -0.8850 H   0  0  0  0  0  0  0  0  0  0  0  0
   -9.4260   -0.5610   -2.0550 H   0  0  0  0  0  0  0  0  0  0  0  0
   -9.3020   -2.2380   -1.3870 H   0  0  0  0  0  0  0  0  0  0  0  0
   -7.2270   -1.3760   -2.0880 H   0  0  0  0  0  0  0  0  0  0  0  0
   -4.7740   -1.1430   -1.9130 H   0  0  0  0  0  0  0  0  0  0  0  0
   -0.9250   -1.1460    1.1970 H   0  0  0  0  0  0  0  0  0  0  0  0
    1.5410   -0.8870    1.2390 H   0  0  0  0  0  0  0  0  0  0  0  0
    3.9860   -1.4980   -2.0030 H   0  0  0  0  0  0  0  0  0  0  0  0
    5.4970   -0.6310   -1.8700 H   0  0  0  0  0  0  0  0  0  0  0  0
    4.9730   -1.9450    1.2620 H   0  0  0  0  0  0  0  0  0  0  0  0
    3.1500    1.3480    3.0110 H   0  0  0  0  0  0  0  0  0  0  0  0
  1  2  2  0  0  0  0
  2  3  1  0  0  0  0
  2  5  1  0  0  0  0
  3  4  1  0  0  0  0
  4 33  1  0  0  0  0
  4 34  1  0  0  0  0
  4 35  1  0  0  0  0
  5  6  1  0  0  0  0
  5 24  2  0  0  0  0
  6  7  1  6  0  0  0
  6  8  1  0  0  0  0
  6 31  1  0  0  0  0
  8  9  2  0  0  0  0
  8 23  1  0  0  0  0
  9 10  1  0  0  0  0
  9 36  1  0  0  0  0
 10 11  2  0  0  0  0
 10 37  1  0  0  0  0
 11 12  1  0  0  0  0
 11 22  1  0  0  0  0
 12 13  2  0  0  0  0
 12 38  1  0  0  0  0
 13 14  1  0  0  0  0
 13 39  1  0  0  0  0
 14 15  2  0  0  0  0
 14 21  1  0  0  0  0
 15 16  1  0  0  0  0
 15 40  1  0  0  0  0
 16 17  2  0  0  0  0
 16 41  1  0  0  0  0
 17 18  1  0  0  0  0
 17 20  1  0  0  0  0
 18 19  1  0  0  0  0
 19 42  1  0  0  0  0
 19 43  1  0  0  0  0
 19 44  1  0  0  0  0
 20 21  2  0  0  0  0
 20 45  1  0  0  0  0
 21 46  1  0  0  0  0
 22 23  2  0  0  0  0
 22 47  1  0  0  0  0
 23 48  1  0  0  0  0
 24 25  1  0  0  0  0
 24 29  1  0  0  0  0
 25 26  1  0  0  0  0
 25 49  1  0  0  0  0
 25 50  1  0  0  0  0
 26 27  1  0  0  0  0
 26 28  1  0  0  0  0
 29 30  1  0  0  0  0
 29 51  1  0  0  0  0
 30 31  1  0  0  0  0
 30 32  2  0  0  0  0
 31 52  1  0  0  0  0
M  CHG  2  27  -1  28  -1
M  END
$$$$
RDU26
 OpenBabel09302314563D

 38 39  0  0  1  0  0  0  0  0999 V2000
   -1.8580    2.7990    0.0430 O   0  0  0  0  0  0  0  0  0  0  0  0
   -1.2320    1.9270   -0.5180 C   0  0  0  0  0  0  0  0  0  0  0  0
   -0.0580    2.2630   -1.1670 O   0  0  0  0  0  0  0  0  0  0  0  0
    0.3110    3.6290   -1.0850 C   0  0  0  0  0  0  0  0  0  0  0  0
   -1.5160    0.5250   -0.6470 C   0  0  0  0  0  0  0  0  0  0  0  0
   -0.6040   -0.2770   -1.5280 C   0  0  1  0  0  0  0  0  0  0  0  0
   -0.3850    0.2810   -2.4830 H   0  0  0  0  0  0  0  0  0  0  0  0
    0.6730   -0.5650   -0.7620 C   0  0  0  0  0  0  0  0  0  0  0  0
    1.8230    0.0500   -1.0520 C   0  0  0  0  0  0  0  0  0  0  0  0
    3.0600   -0.1670   -0.3060 C   0  0  0  0  0  0  0  0  0  0  0  0
    3.8710    0.9330    0.0060 C   0  0  0  0  0  0  0  0  0  0  0  0
    5.0610    0.7590    0.7060 C   0  0  0  0  0  0  0  0  0  0  0  0
    5.4170   -0.5360    1.0780 C   0  0  0  0  0  0  0  0  0  0  0  0
    6.5550   -0.7140    1.7370 F   0  0  0  0  0  0  0  0  0  0  0  0
    4.6340   -1.6510    0.7890 C   0  0  0  0  0  0  0  0  0  0  0  0
    3.4460   -1.4520    0.0910 C   0  0  0  0  0  0  0  0  0  0  0  0
   -1.2200   -1.5510   -1.9380 N   0  0  0  0  0  0  0  0  0  0  0  0
   -2.5770   -0.0660    0.0230 C   0  0  0  0  0  0  0  0  0  0  0  0
   -3.4140    0.6830    0.9870 C   0  0  0  0  0  0  0  0  0  0  0  0
   -4.4890   -0.0770    1.8620 C   0  0  0  0  0  3  0  0  0  0  0  0
   -4.7280   -1.2590    1.5620 O   0  5  0  0  0  0  0  0  0  0  0  0
   -4.9840    0.6090    2.7480 O   0  5  0  0  0  0  0  0  0  0  0  0
   -2.8660   -1.3880   -0.2070 N   0  0  0  0  0  0  0  0  0  0  0  0
   -2.2030   -2.1630   -1.1730 C   0  0  0  0  0  0  0  0  0  0  0  0
   -2.5170   -3.3220   -1.3750 O   0  0  0  0  0  0  0  0  0  0  0  0
    1.2460    3.6740   -1.6480 H   0  0  0  0  0  0  0  0  0  0  0  0
   -0.4610    4.2590   -1.5400 H   0  0  0  0  0  0  0  0  0  0  0  0
    0.4580    3.9160   -0.0370 H   0  0  0  0  0  0  0  0  0  0  0  0
    0.5660   -1.2730    0.0580 H   0  0  0  0  0  0  0  0  0  0  0  0
    1.8860    0.7900   -1.8530 H   0  0  0  0  0  0  0  0  0  0  0  0
    3.5570    1.9330   -0.2920 H   0  0  0  0  0  0  0  0  0  0  0  0
    5.6890    1.6100    0.9560 H   0  0  0  0  0  0  0  0  0  0  0  0
    4.9360   -2.6480    1.1000 H   0  0  0  0  0  0  0  0  0  0  0  0
    2.8090   -2.3050   -0.1480 H   0  0  0  0  0  0  0  0  0  0  0  0
   -0.6840   -2.1430   -2.5540 H   0  0  0  0  0  0  0  0  0  0  0  0
   -2.7750    1.2370    1.7100 H   0  0  0  0  0  0  0  0  0  0  0  0
   -3.9750    1.4890    0.4660 H   0  0  0  0  0  0  0  0  0  0  0  0
   -3.6640   -1.8550    0.3250 H   0  0  0  0  0  0  0  0  0  0  0  0
  1  2  2  0  0  0  0
  2  3  1  0  0  0  0
  2  5  1  0  0  0  0
  3  4  1  0  0  0  0
  4 26  1  0  0  0  0
  4 27  1  0  0  0  0
  4 28  1  0  0  0  0
  5  6  1  0  0  0  0
  5 18  2  0  0  0  0
  6  7  1  6  0  0  0
  6  8  1  0  0  0  0
  6 17  1  0  0  0  0
  8  9  2  0  0  0  0
  8 29  1  0  0  0  0
  9 10  1  0  0  0  0
  9 30  1  0  0  0  0
 10 11  2  0  0  0  0
 10 16  1  0  0  0  0
 11 12  1  0  0  0  0
 11 31  1  0  0  0  0
 12 13  2  0  0  0  0
 12 32  1  0  0  0  0
 13 14  1  0  0  0  0
 13 15  1  0  0  0  0
 15 16  2  0  0  0  0
 15 33  1  0  0  0  0
 16 34  1  0  0  0  0
 17 24  1  0  0  0  0
 17 35  1  0  0  0  0
 18 19  1  0  0  0  0
 18 23  1  0  0  0  0
 19 20  1  0  0  0  0
 19 36  1  0  0  0  0
 19 37  1  0  0  0  0
 20 21  1  0  0  0  0
 20 22  1  0  0  0  0
 23 24  1  0  0  0  0
 23 38  1  0  0  0  0
 24 25  2  0  0  0  0
M  CHG  2  21  -1  22  -1
M  END
$$$$
RDU27
 OpenBabel09302314563D

 38 39  0  0  1  0  0  0  0  0999 V2000
   -3.2400    0.4550    3.2830 O   0  0  0  0  0  0  0  0  0  0  0  0
   -2.7430   -0.0550    2.3050 C   0  0  0  0  0  0  0  0  0  0  0  0
   -2.0740   -1.2170    2.5580 O   0  0  0  0  0  0  0  0  0  0  0  0
   -1.3210   -1.8330    1.5240 C   0  0  0  0  0  0  0  0  0  0  0  0
   -2.7680    0.5100    0.9590 C   0  0  0  0  0  0  0  0  0  0  0  0
   -2.0500    1.8240    0.8410 C   0  0  1  0  0  0  0  0  0  0  0  0
   -2.3140    2.4800    1.7230 H   0  0  0  0  0  0  0  0  0  0  0  0
   -0.5610    1.5280    0.8500 C   0  0  0  0  0  0  0  0  0  0  0  0
    0.1260    1.1950   -0.2470 C   0  0  0  0  0  0  0  0  0  0  0  0
    1.5320    0.8010   -0.2130 C   0  0  0  0  0  0  0  0  0  0  0  0
    2.4830    1.5750    0.4580 C   0  0  0  0  0  0  0  0  0  0  0  0
    3.8200    1.1800    0.4840 C   0  0  0  0  0  0  0  0  0  0  0  0
    4.1780    0.0060   -0.1650 C   0  0  0  0  0  0  0  0  0  0  0  0
    6.0030   -0.5390   -0.1310 Br  0  0  0  0  0  0  0  0  0  0  0  0
    3.2530   -0.7840   -0.8370 C   0  0  0  0  0  0  0  0  0  0  0  0
    1.9220   -0.3770   -0.8620 C   0  0  0  0  0  0  0  0  0  0  0  0
   -2.4620    2.5620   -0.3630 N   0  0  0  0  0  0  0  0  0  0  0  0
   -3.4270   -0.0450   -0.0980 C   0  0  0  0  0  0  0  0  0  0  0  0
   -4.1480   -1.3330   -0.0690 C   0  0  0  0  0  0  0  0  0  0  0  0
   -3.6190   -2.2720   -1.2520 C   0  0  0  0  0  3  0  0  0  0  0  0
   -3.6450   -1.7210   -2.3620 O   0  5  0  0  0  0  0  0  0  0  0  0
   -3.2640   -3.3930   -0.9190 O   0  5  0  0  0  0  0  0  0  0  0  0
   -3.4740    0.6180   -1.3200 N   0  0  0  0  0  0  0  0  0  0  0  0
   -2.9320    1.8930   -1.4950 C   0  0  0  0  0  0  0  0  0  0  0  0
   -2.9430    2.4510   -2.5770 O   0  0  0  0  0  0  0  0  0  0  0  0
   -0.5790   -2.4200    2.0760 H   0  0  0  0  0  0  0  0  0  0  0  0
   -0.8340   -1.1060    0.8690 H   0  0  0  0  0  0  0  0  0  0  0  0
   -1.9810   -2.4980    0.9440 H   0  0  0  0  0  0  0  0  0  0  0  0
   -0.1130    1.5370    1.8410 H   0  0  0  0  0  0  0  0  0  0  0  0
   -0.3430    1.1580   -1.2360 H   0  0  0  0  0  0  0  0  0  0  0  0
    2.1790    2.4920    0.9610 H   0  0  0  0  0  0  0  0  0  0  0  0
    4.5550    1.7890    1.0060 H   0  0  0  0  0  0  0  0  0  0  0  0
    3.5490   -1.7050   -1.3370 H   0  0  0  0  0  0  0  0  0  0  0  0
    1.1750   -0.9820   -1.3840 H   0  0  0  0  0  0  0  0  0  0  0  0
   -2.0020    3.4460   -0.5290 H   0  0  0  0  0  0  0  0  0  0  0  0
   -5.2290   -1.2130   -0.2530 H   0  0  0  0  0  0  0  0  0  0  0  0
   -4.0500   -1.8710    0.8880 H   0  0  0  0  0  0  0  0  0  0  0  0
   -3.7270    0.0420   -2.1800 H   0  0  0  0  0  0  0  0  0  0  0  0
  1  2  2  0  0  0  0
  2  3  1  0  0  0  0
  2  5  1  0  0  0  0
  3  4  1  0  0  0  0
  4 26  1  0  0  0  0
  4 27  1  0  0  0  0
  4 28  1  0  0  0  0
  5  6  1  0  0  0  0
  5 18  2  0  0  0  0
  6  7  1  1  0  0  0
  6  8  1  0  0  0  0
  6 17  1  0  0  0  0
  8  9  2  0  0  0  0
  8 29  1  0  0  0  0
  9 10  1  0  0  0  0
  9 30  1  0  0  0  0
 10 11  2  0  0  0  0
 10 16  1  0  0  0  0
 11 12  1  0  0  0  0
 11 31  1  0  0  0  0
 12 13  2  0  0  0  0
 12 32  1  0  0  0  0
 13 14  1  0  0  0  0
 13 15  1  0  0  0  0
 15 16  2  0  0  0  0
 15 33  1  0  0  0  0
 16 34  1  0  0  0  0
 17 24  1  0  0  0  0
 17 35  1  0  0  0  0
 18 19  1  0  0  0  0
 18 23  1  0  0  0  0
 19 20  1  0  0  0  0
 19 36  1  0  0  0  0
 19 37  1  0  0  0  0
 20 21  1  0  0  0  0
 20 22  1  0  0  0  0
 23 24  1  0  0  0  0
 23 38  1  0  0  0  0
 24 25  2  0  0  0  0
M  CHG  2  21  -1  22  -1
M  END
$$$$
RDU28
 OpenBabel09302314563D

 40 41  0  0  1  0  0  0  0  0999 V2000
    2.4370    1.5990   -2.4910 O   0  0  0  0  0  0  0  0  0  0  0  0
    2.7250    0.9120   -1.5320 C   0  0  0  0  0  0  0  0  0  0  0  0
    3.8420    0.1160   -1.5690 O   0  0  0  0  0  0  0  0  0  0  0  0
    4.5280    0.0840   -2.8120 C   0  0  0  0  0  0  0  0  0  0  0  0
    2.0510    0.8370   -0.2710 C   0  0  0  0  0  0  0  0  0  0  0  0
    0.9700    1.8650   -0.0470 C   0  0  1  0  0  0  0  0  0  0  0  0
    1.1330    2.7850   -0.6710 H   0  0  0  0  0  0  0  0  0  0  0  0
   -0.2950    1.1450   -0.4770 C   0  0  0  0  0  0  0  0  0  0  0  0
   -1.1990    0.6390    0.3640 C   0  0  0  0  0  0  0  0  0  0  0  0
   -2.2030   -0.3360   -0.0630 C   0  0  0  0  0  0  0  0  0  0  0  0
   -3.5110   -0.0010   -0.4320 C   0  0  0  0  0  0  0  0  0  0  0  0
   -3.9530    1.3780   -0.3980 N   0  0  0  0  0  0  0  0  0  0  0  0
   -3.2950    2.1980    0.2210 O   0  0  0  0  0  1  0  0  0  0  0  0
   -4.9860    1.6730   -0.9880 O   0  0  0  0  0  1  0  0  0  0  0  0
   -4.4200   -0.9890   -0.8380 C   0  0  0  0  0  0  0  0  0  0  0  0
   -4.0210   -2.3170   -0.8590 C   0  0  0  0  0  0  0  0  0  0  0  0
   -2.7210   -2.6640   -0.4770 C   0  0  0  0  0  0  0  0  0  0  0  0
   -1.8210   -1.6850   -0.0810 C   0  0  0  0  0  0  0  0  0  0  0  0
    0.9620    2.2760    1.3660 N   0  0  0  0  0  0  0  0  0  0  0  0
    2.2240   -0.1340    0.6950 C   0  0  0  0  0  0  0  0  0  0  0  0
    2.7760   -1.4830    0.4730 C   0  0  0  0  0  0  0  0  0  0  0  0
    1.6460   -2.5410    0.8770 C   0  0  0  0  0  3  0  0  0  0  0  0
    1.1850   -2.3580    2.0150 O   0  5  0  0  0  0  0  0  0  0  0  0
    1.3570   -3.3720    0.0300 O   0  5  0  0  0  0  0  0  0  0  0  0
    1.7820    0.1080    1.9820 N   0  0  0  0  0  0  0  0  0  0  0  0
    1.1870    1.3330    2.3600 C   0  0  0  0  0  0  0  0  0  0  0  0
    0.9420    1.5690    3.5270 O   0  0  0  0  0  0  0  0  0  0  0  0
    3.8600   -0.2750   -3.6030 H   0  0  0  0  0  0  0  0  0  0  0  0
    5.3450   -0.6200   -2.6280 H   0  0  0  0  0  0  0  0  0  0  0  0
    4.9050    1.0800   -3.0620 H   0  0  0  0  0  0  0  0  0  0  0  0
   -0.3270    0.9670   -1.5530 H   0  0  0  0  0  0  0  0  0  0  0  0
   -1.2130    0.8530    1.4360 H   0  0  0  0  0  0  0  0  0  0  0  0
   -5.4340   -0.7130   -1.1320 H   0  0  0  0  0  0  0  0  0  0  0  0
   -4.7180   -3.0890   -1.1720 H   0  0  0  0  0  0  0  0  0  0  0  0
   -2.4050   -3.7100   -0.4880 H   0  0  0  0  0  0  0  0  0  0  0  0
   -0.7990   -1.9720    0.2270 H   0  0  0  0  0  0  0  0  0  0  0  0
    0.4320    3.0980    1.6160 H   0  0  0  0  0  0  0  0  0  0  0  0
    3.6530   -1.7130    1.0950 H   0  0  0  0  0  0  0  0  0  0  0  0
    3.0680   -1.6730   -0.5740 H   0  0  0  0  0  0  0  0  0  0  0  0
    1.6160   -0.7360    2.6110 H   0  0  0  0  0  0  0  0  0  0  0  0
  1  2  2  0  0  0  0
  2  3  1  0  0  0  0
  2  5  1  0  0  0  0
  3  4  1  0  0  0  0
  4 28  1  0  0  0  0
  4 29  1  0  0  0  0
  4 30  1  0  0  0  0
  5  6  1  0  0  0  0
  5 20  2  0  0  0  0
  6  7  1  6  0  0  0
  6  8  1  0  0  0  0
  6 19  1  0  0  0  0
  8  9  2  0  0  0  0
  8 31  1  0  0  0  0
  9 10  1  0  0  0  0
  9 32  1  0  0  0  0
 10 11  2  0  0  0  0
 10 18  1  0  0  0  0
 11 12  1  0  0  0  0
 11 15  1  0  0  0  0
 12 13  1  0  0  0  0
 12 14  1  0  0  0  0
 15 16  2  0  0  0  0
 15 33  1  0  0  0  0
 16 17  1  0  0  0  0
 16 34  1  0  0  0  0
 17 18  2  0  0  0  0
 17 35  1  0  0  0  0
 18 36  1  0  0  0  0
 19 26  1  0  0  0  0
 19 37  1  0  0  0  0
 20 21  1  0  0  0  0
 20 25  1  0  0  0  0
 21 22  1  0  0  0  0
 21 38  1  0  0  0  0
 21 39  1  0  0  0  0
 22 23  1  0  0  0  0
 22 24  1  0  0  0  0
 25 26  1  0  0  0  0
 25 40  1  0  0  0  0
 26 27  2  0  0  0  0
M  CHG  2  23  -1  24  -1
M  END
$$$$
RDU29
 OpenBabel09302314563D

 38 39  0  0  1  0  0  0  0  0999 V2000
   -0.8500   -1.7170   -2.2590 O   0  0  0  0  0  0  0  0  0  0  0  0
   -1.6330   -1.3350   -1.4130 C   0  0  0  0  0  0  0  0  0  0  0  0
   -2.7070   -2.1050   -1.0690 O   0  0  0  0  0  0  0  0  0  0  0  0
   -2.5100   -3.5030   -1.2520 C   0  0  0  0  0  0  0  0  0  0  0  0
   -1.6710   -0.0150   -0.8110 C   0  0  0  0  0  0  0  0  0  0  0  0
   -0.7930    1.0030   -1.4870 C   0  0  2  0  0  0  0  0  0  0  0  0
   -0.7670    0.8260   -2.6010 H   0  0  0  0  0  0  0  0  0  0  0  0
    0.5970    0.8220   -0.9130 C   0  0  0  0  0  0  0  0  0  0  0  0
    0.9680    1.8480    0.6510 Br  0  0  0  0  0  0  0  0  0  0  0  0
    1.4810   -0.0680   -1.3570 C   0  0  0  0  0  0  0  0  0  0  0  0
    2.6960   -0.4540   -0.6390 C   0  0  0  0  0  0  0  0  0  0  0  0
    3.9550   -0.0180   -1.0480 C   0  0  0  0  0  0  0  0  0  0  0  0
    5.0880   -0.4230   -0.3430 C   0  0  0  0  0  0  0  0  0  0  0  0
    4.9600   -1.2630    0.7610 C   0  0  0  0  0  0  0  0  0  0  0  0
    3.6980   -1.7010    1.1660 C   0  0  0  0  0  0  0  0  0  0  0  0
    2.5640   -1.3000    0.4690 C   0  0  0  0  0  0  0  0  0  0  0  0
   -2.2910    0.2830    0.3720 C   0  0  0  0  0  0  0  0  0  0  0  0
   -2.8640   -0.6570    1.3360 C   0  0  0  0  0  0  0  0  0  0  0  0
   -1.7510   -1.7650    1.7810 C   0  0  0  0  0  3  0  0  0  0  0  0
   -0.8740   -1.9870    0.9520 O   0  5  0  0  0  0  0  0  0  0  0  0
   -1.9750   -2.2350    2.8890 O   0  5  0  0  0  0  0  0  0  0  0  0
   -2.3830    1.6340    0.7440 N   0  0  0  0  0  0  0  0  0  0  0  0
   -1.9600    2.6870   -0.0870 C   0  0  0  0  0  0  0  0  0  0  0  0
   -1.3180    2.3600   -1.2730 N   0  0  0  0  0  0  0  0  0  0  0  0
   -2.2210    3.8410    0.2070 O   0  0  0  0  0  0  0  0  0  0  0  0
   -3.4280   -3.9380   -0.8490 H   0  0  0  0  0  0  0  0  0  0  0  0
   -1.6340   -3.8170   -0.6640 H   0  0  0  0  0  0  0  0  0  0  0  0
   -2.3750   -3.7360   -2.3100 H   0  0  0  0  0  0  0  0  0  0  0  0
    1.2970   -0.6470   -2.2730 H   0  0  0  0  0  0  0  0  0  0  0  0
    4.0510    0.6400   -1.9060 H   0  0  0  0  0  0  0  0  0  0  0  0
    6.0690   -0.0810   -0.6540 H   0  0  0  0  0  0  0  0  0  0  0  0
    5.8440   -1.5750    1.3090 H   0  0  0  0  0  0  0  0  0  0  0  0
    3.5970   -2.3540    2.0300 H   0  0  0  0  0  0  0  0  0  0  0  0
    1.5600   -1.6360    0.7800 H   0  0  0  0  0  0  0  0  0  0  0  0
   -3.6910   -1.2640    0.9420 H   0  0  0  0  0  0  0  0  0  0  0  0
   -3.2310   -0.2010    2.2660 H   0  0  0  0  0  0  0  0  0  0  0  0
   -2.7600    1.8930    1.6480 H   0  0  0  0  0  0  0  0  0  0  0  0
   -0.8830    3.1170   -1.7790 H   0  0  0  0  0  0  0  0  0  0  0  0
  1  2  2  0  0  0  0
  2  3  1  0  0  0  0
  2  5  1  0  0  0  0
  3  4  1  0  0  0  0
  4 26  1  0  0  0  0
  4 27  1  0  0  0  0
  4 28  1  0  0  0  0
  5  6  1  0  0  0  0
  5 17  2  0  0  0  0
  6  7  1  6  0  0  0
  6  8  1  0  0  0  0
  6 24  1  0  0  0  0
  8  9  1  0  0  0  0
  8 10  2  0  0  0  0
 10 11  1  0  0  0  0
 10 29  1  0  0  0  0
 11 12  2  0  0  0  0
 11 16  1  0  0  0  0
 12 13  1  0  0  0  0
 12 30  1  0  0  0  0
 13 14  2  0  0  0  0
 13 31  1  0  0  0  0
 14 15  1  0  0  0  0
 14 32  1  0  0  0  0
 15 16  2  0  0  0  0
 15 33  1  0  0  0  0
 16 34  1  0  0  0  0
 17 18  1  0  0  0  0
 17 22  1  0  0  0  0
 18 19  1  0  0  0  0
 18 35  1  0  0  0  0
 18 36  1  0  0  0  0
 19 20  1  0  0  0  0
 19 21  1  0  0  0  0
 22 23  1  0  0  0  0
 22 37  1  0  0  0  0
 23 24  1  0  0  0  0
 23 25  2  0  0  0  0
 24 38  1  0  0  0  0
M  CHG  2  20  -1  21  -1
M  END
$$$$
RDU30
 OpenBabel09302314563D

 41 42  0  0  1  0  0  0  0  0999 V2000
    0.2050    1.8970   -1.9980 O   0  0  0  0  0  0  0  0  0  0  0  0
   -0.6330    1.5830   -1.1760 C   0  0  0  0  0  0  0  0  0  0  0  0
   -1.2690    2.5610   -0.4560 O   0  0  0  0  0  0  0  0  0  0  0  0
   -0.8750    3.8930   -0.7500 C   0  0  0  0  0  0  0  0  0  0  0  0
   -1.0590    0.2560   -0.8260 C   0  0  0  0  0  0  0  0  0  0  0  0
   -0.1310   -0.8070   -1.3570 C   0  0  1  0  0  0  0  0  0  0  0  0
    0.1680   -0.5550   -2.4170 H   0  0  0  0  0  0  0  0  0  0  0  0
    1.1090   -0.8350   -0.4630 C   0  0  0  0  0  0  0  0  0  0  0  0
    0.9850   -1.5580    0.8300 C   0  0  0  0  0  0  0  0  0  0  0  0
    2.2080   -0.1790   -0.8540 C   0  0  0  0  0  0  0  0  0  0  0  0
    3.4290   -0.0580   -0.0580 C   0  0  0  0  0  0  0  0  0  0  0  0
    4.5850   -0.7480   -0.4340 C   0  0  0  0  0  0  0  0  0  0  0  0
    5.7490   -0.6160    0.3190 C   0  0  0  0  0  0  0  0  0  0  0  0
    5.7680    0.2070    1.4440 C   0  0  0  0  0  0  0  0  0  0  0  0
    4.6160    0.9000    1.8160 C   0  0  0  0  0  0  0  0  0  0  0  0
    3.4490    0.7700    1.0700 C   0  0  0  0  0  0  0  0  0  0  0  0
   -0.7840   -2.1230   -1.4210 N   0  0  0  0  0  0  0  0  0  0  0  0
   -2.1740   -0.0950   -0.0890 C   0  0  0  0  0  0  0  0  0  0  0  0
   -3.0860    0.8940    0.5500 C   0  0  0  0  0  0  0  0  0  0  0  0
   -4.3480    0.3580    1.3070 C   0  0  0  0  0  3  0  0  0  0  0  0
   -4.4740   -0.8910    1.4100 O   0  5  0  0  0  0  0  0  0  0  0  0
   -5.1020    1.2150    1.7440 O   0  5  0  0  0  0  0  0  0  0  0  0
   -2.4880   -1.4120    0.1020 N   0  0  0  0  0  0  0  0  0  0  0  0
   -1.8060   -2.4550   -0.5290 C   0  0  0  0  0  0  0  0  0  0  0  0
   -2.1200   -3.6200   -0.3650 O   0  0  0  0  0  0  0  0  0  0  0  0
   -1.4990    4.4890   -0.0760 H   0  0  0  0  0  0  0  0  0  0  0  0
   -1.0800    4.1280   -1.7990 H   0  0  0  0  0  0  0  0  0  0  0  0
    0.1900    4.0270   -0.5380 H   0  0  0  0  0  0  0  0  0  0  0  0
    1.8550   -1.4170    1.4840 H   0  0  0  0  0  0  0  0  0  0  0  0
    0.8650   -2.6410    0.6810 H   0  0  0  0  0  0  0  0  0  0  0  0
    0.0980   -1.2120    1.3890 H   0  0  0  0  0  0  0  0  0  0  0  0
    2.2410    0.3600   -1.8070 H   0  0  0  0  0  0  0  0  0  0  0  0
    4.5680   -1.3890   -1.3110 H   0  0  0  0  0  0  0  0  0  0  0  0
    6.6460   -1.1570    0.0290 H   0  0  0  0  0  0  0  0  0  0  0  0
    6.6760    0.3070    2.0290 H   0  0  0  0  0  0  0  0  0  0  0  0
    4.6310    1.5420    2.6930 H   0  0  0  0  0  0  0  0  0  0  0  0
    2.5460    1.3090    1.3540 H   0  0  0  0  0  0  0  0  0  0  0  0
   -0.2220   -2.8870   -1.7670 H   0  0  0  0  0  0  0  0  0  0  0  0
   -3.4630    1.6180   -0.2030 H   0  0  0  0  0  0  0  0  0  0  0  0
   -2.5310    1.5070    1.2930 H   0  0  0  0  0  0  0  0  0  0  0  0
   -3.4320   -1.6340    0.7220 H   0  0  0  0  0  0  0  0  0  0  0  0
  1  2  2  0  0  0  0
  2  3  1  0  0  0  0
  2  5  1  0  0  0  0
  3  4  1  0  0  0  0
  4 26  1  0  0  0  0
  4 27  1  0  0  0  0
  4 28  1  0  0  0  0
  5  6  1  0  0  0  0
  5 18  2  0  0  0  0
  6  7  1  6  0  0  0
  6  8  1  0  0  0  0
  6 17  1  0  0  0  0
  8  9  1  0  0  0  0
  8 10  2  0  0  0  0
  9 29  1  0  0  0  0
  9 30  1  0  0  0  0
  9 31  1  0  0  0  0
 10 11  1  0  0  0  0
 10 32  1  0  0  0  0
 11 12  2  0  0  0  0
 11 16  1  0  0  0  0
 12 13  1  0  0  0  0
 12 33  1  0  0  0  0
 13 14  2  0  0  0  0
 13 34  1  0  0  0  0
 14 15  1  0  0  0  0
 14 35  1  0  0  0  0
 15 16  2  0  0  0  0
 15 36  1  0  0  0  0
 16 37  1  0  0  0  0
 17 24  1  0  0  0  0
 17 38  1  0  0  0  0
 18 19  1  0  0  0  0
 18 23  1  0  0  0  0
 19 20  1  0  0  0  0
 19 39  1  0  0  0  0
 19 40  1  0  0  0  0
 20 21  1  0  0  0  0
 20 22  1  0  0  0  0
 23 24  1  0  0  0  0
 23 41  1  0  0  0  0
 24 25  2  0  0  0  0
M  CHG  2  21  -1  22  -1
M  END
$$$$
RDZ01
 OpenBabel09302314563D

 35 37  0  0  1  0  0  0  0  0999 V2000
    1.2300   -2.6140   -1.7260 O   0  0  0  0  0  0  0  0  0  0  0  0
    0.3630   -1.8890   -1.2990 C   0  0  0  0  0  0  0  0  0  0  0  0
   -0.9370   -2.3360   -1.2340 O   0  0  0  0  0  0  0  0  0  0  0  0
   -1.1470   -3.6720   -1.6620 C   0  0  0  0  0  0  0  0  0  0  0  0
    0.4360   -0.5180   -0.8450 C   0  0  0  0  0  0  0  0  0  0  0  0
    1.6170    0.0300   -0.3800 C   0  0  0  0  0  0  0  0  0  0  0  0
    2.8210   -0.7440   -0.0270 C   0  0  0  0  0  0  0  0  0  0  0  0
    3.4910   -0.2870    1.3550 C   0  0  0  0  0  3  0  0  0  0  0  0
    3.9000   -1.1970    2.0560 O   0  5  0  0  0  0  0  0  0  0  0  0
    3.5360    0.9430    1.5170 O   0  5  0  0  0  0  0  0  0  0  0  0
    1.7550    1.4050   -0.2440 N   0  0  0  0  0  0  0  0  0  0  0  0
    0.6910    2.2140   -0.5680 C   0  0  0  0  0  0  0  0  0  0  0  0
    0.5690    3.5730   -0.6890 N   0  0  0  0  0  0  0  0  0  0  0  0
   -0.6850    3.8040   -1.1260 N   0  0  0  0  0  0  0  0  0  0  0  0
   -1.3650    2.7100   -1.2950 N   0  0  0  0  0  0  0  0  0  0  0  0
   -0.5470    1.6730   -0.9530 N   0  0  0  0  0  0  0  0  0  0  0  0
   -0.8680    0.2360   -0.9070 C   0  0  2  0  0  0  0  0  0  0  0  0
   -1.4320   -0.0250   -1.8500 H   0  0  0  0  0  0  0  0  0  0  0  0
   -1.7570   -0.0180    0.2980 C   0  0  0  0  0  0  0  0  0  0  0  0
   -3.1150    0.2910    0.2020 C   0  0  0  0  0  0  0  0  0  0  0  0
   -3.9570    0.0700    1.2890 C   0  0  0  0  0  0  0  0  0  0  0  0
   -3.4430   -0.4590    2.4730 C   0  0  0  0  0  0  0  0  0  0  0  0
   -2.0870   -0.7630    2.5680 C   0  0  0  0  0  0  0  0  0  0  0  0
   -1.2420   -0.5430    1.4820 C   0  0  0  0  0  0  0  0  0  0  0  0
   -2.2200   -3.8170   -1.5070 H   0  0  0  0  0  0  0  0  0  0  0  0
   -0.5590   -4.3610   -1.0460 H   0  0  0  0  0  0  0  0  0  0  0  0
   -0.8740   -3.7810   -2.7160 H   0  0  0  0  0  0  0  0  0  0  0  0
    3.6230   -0.6380   -0.7800 H   0  0  0  0  0  0  0  0  0  0  0  0
    2.6300   -1.8300    0.0560 H   0  0  0  0  0  0  0  0  0  0  0  0
    2.5580    1.7940    0.3470 H   0  0  0  0  0  0  0  0  0  0  0  0
   -3.5140    0.7180   -0.7170 H   0  0  0  0  0  0  0  0  0  0  0  0
   -5.0120    0.3140    1.2160 H   0  0  0  0  0  0  0  0  0  0  0  0
   -4.0990   -0.6280    3.3210 H   0  0  0  0  0  0  0  0  0  0  0  0
   -1.6810   -1.1710    3.4920 H   0  0  0  0  0  0  0  0  0  0  0  0
   -0.1790   -0.7890    1.5610 H   0  0  0  0  0  0  0  0  0  0  0  0
  1  2  2  0  0  0  0
  2  3  1  0  0  0  0
  2  5  1  0  0  0  0
  3  4  1  0  0  0  0
  4 25  1  0  0  0  0
  4 26  1  0  0  0  0
  4 27  1  0  0  0  0
  5  6  2  0  0  0  0
  5 17  1  0  0  0  0
  6  7  1  0  0  0  0
  6 11  1  0  0  0  0
  7  8  1  0  0  0  0
  7 28  1  0  0  0  0
  7 29  1  0  0  0  0
  8  9  1  0  0  0  0
  8 10  1  0  0  0  0
 11 12  1  0  0  0  0
 11 30  1  0  0  0  0
 12 13  2  0  0  0  0
 12 16  1  0  0  0  0
 13 14  1  0  0  0  0
 14 15  2  0  0  0  0
 15 16  1  0  0  0  0
 16 17  1  0  0  0  0
 17 18  1  6  0  0  0
 17 19  1  0  0  0  0
 19 20  2  0  0  0  0
 19 24  1  0  0  0  0
 20 21  1  0  0  0  0
 20 31  1  0  0  0  0
 21 22  2  0  0  0  0
 21 32  1  0  0  0  0
 22 23  1  0  0  0  0
 22 33  1  0  0  0  0
 23 24  2  0  0  0  0
 23 34  1  0  0  0  0
 24 35  1  0  0  0  0
M  CHG  2   9  -1  10  -1
M  END
$$$$
RDZ02
 OpenBabel09302314563D

 36 38  0  0  1  0  0  0  0  0999 V2000
    0.0530   -2.8440   -0.4360 O   0  0  0  0  0  0  0  0  0  0  0  0
   -0.5510   -2.0560    0.2490 C   0  0  0  0  0  0  0  0  0  0  0  0
   -1.2640   -2.6040    1.2750 O   0  0  0  0  0  0  0  0  0  0  0  0
   -2.1070   -1.7560    2.0430 C   0  0  0  0  0  0  0  0  0  0  0  0
   -0.5450   -0.5960    0.0850 C   0  0  0  0  0  0  0  0  0  0  0  0
   -1.5510    0.0400   -0.5820 C   0  0  0  0  0  0  0  0  0  0  0  0
   -2.7390   -0.6390   -1.1330 C   0  0  0  0  0  0  0  0  0  0  0  0
   -4.0650    0.0370   -0.5360 C   0  0  0  0  0  3  0  0  0  0  0  0
   -4.0780    1.2700   -0.6640 O   0  5  0  0  0  0  0  0  0  0  0  0
   -4.8720   -0.7330   -0.0420 O   0  5  0  0  0  0  0  0  0  0  0  0
   -1.5220    1.4210   -0.8230 N   0  0  0  0  0  0  0  0  0  0  0  0
   -0.5220    2.1460   -0.2200 C   0  0  0  0  0  0  0  0  0  0  0  0
   -0.2480    3.4870   -0.2040 N   0  0  0  0  0  0  0  0  0  0  0  0
    0.8850    3.6350    0.5120 N   0  0  0  0  0  0  0  0  0  0  0  0
    1.3540    2.5070    0.9440 N   0  0  0  0  0  0  0  0  0  0  0  0
    0.4960    1.5260    0.5330 N   0  0  0  0  0  0  0  0  0  0  0  0
    0.6800    0.0660    0.6570 C   0  0  2  0  0  0  0  0  0  0  0  0
    0.7630   -0.1720    1.7600 H   0  0  0  0  0  0  0  0  0  0  0  0
    1.9430   -0.3360   -0.0660 C   0  0  0  0  0  0  0  0  0  0  0  0
    1.9260   -0.7290   -1.4010 C   0  0  0  0  0  0  0  0  0  0  0  0
    3.1130   -1.0340   -2.0700 C   0  0  0  0  0  0  0  0  0  0  0  0
    4.3340   -0.9500   -1.4060 C   0  0  0  0  0  0  0  0  0  0  0  0
    4.3830   -0.5780   -0.0640 C   0  0  0  0  0  0  0  0  0  0  0  0
    3.1830   -0.2890    0.5880 C   0  0  0  0  0  0  0  0  0  0  0  0
    3.1510    0.0260    1.9080 O   0  0  0  0  0  0  0  0  0  0  0  0
   -2.4250   -2.4120    2.8610 H   0  0  0  0  0  0  0  0  0  0  0  0
   -2.9800   -1.4520    1.4430 H   0  0  0  0  0  0  0  0  0  0  0  0
   -1.5680   -0.8860    2.4240 H   0  0  0  0  0  0  0  0  0  0  0  0
   -2.7670   -1.7210   -0.9200 H   0  0  0  0  0  0  0  0  0  0  0  0
   -2.8250   -0.5290   -2.2270 H   0  0  0  0  0  0  0  0  0  0  0  0
   -2.4650    1.8950   -1.0130 H   0  0  0  0  0  0  0  0  0  0  0  0
    0.9690   -0.8140   -1.9270 H   0  0  0  0  0  0  0  0  0  0  0  0
    3.0780   -1.3420   -3.1110 H   0  0  0  0  0  0  0  0  0  0  0  0
    5.2570   -1.1810   -1.9340 H   0  0  0  0  0  0  0  0  0  0  0  0
    5.3260   -0.5170    0.4610 H   0  0  0  0  0  0  0  0  0  0  0  0
    4.0470    0.2280    2.2650 H   0  0  0  0  0  0  0  0  0  0  0  0
  1  2  2  0  0  0  0
  2  3  1  0  0  0  0
  2  5  1  0  0  0  0
  3  4  1  0  0  0  0
  4 26  1  0  0  0  0
  4 27  1  0  0  0  0
  4 28  1  0  0  0  0
  5  6  2  0  0  0  0
  5 17  1  0  0  0  0
  6  7  1  0  0  0  0
  6 11  1  0  0  0  0
  7  8  1  0  0  0  0
  7 29  1  0  0  0  0
  7 30  1  0  0  0  0
  8  9  1  0  0  0  0
  8 10  1  0  0  0  0
 11 12  1  0  0  0  0
 11 31  1  0  0  0  0
 12 13  2  0  0  0  0
 12 16  1  0  0  0  0
 13 14  1  0  0  0  0
 14 15  2  0  0  0  0
 15 16  1  0  0  0  0
 16 17  1  0  0  0  0
 17 18  1  1  0  0  0
 17 19  1  0  0  0  0
 19 20  2  0  0  0  0
 19 24  1  0  0  0  0
 20 21  1  0  0  0  0
 20 32  1  0  0  0  0
 21 22  2  0  0  0  0
 21 33  1  0  0  0  0
 22 23  1  0  0  0  0
 22 34  1  0  0  0  0
 23 24  2  0  0  0  0
 23 35  1  0  0  0  0
 24 25  1  0  0  0  0
 25 36  1  0  0  0  0
M  CHG  2   9  -1  10  -1
M  END
$$$$
RDZ03
 OpenBabel09302314563D

 36 38  0  0  1  0  0  0  0  0999 V2000
    0.3210   -2.7800   -0.2810 O   0  0  0  0  0  0  0  0  0  0  0  0
   -0.4380   -2.0610    0.3190 C   0  0  0  0  0  0  0  0  0  0  0  0
   -1.2150   -2.6890    1.2490 O   0  0  0  0  0  0  0  0  0  0  0  0
   -2.2090   -1.9400    1.9330 C   0  0  0  0  0  0  0  0  0  0  0  0
   -0.5520   -0.6040    0.1690 C   0  0  0  0  0  0  0  0  0  0  0  0
   -1.5580   -0.0350   -0.5540 C   0  0  0  0  0  0  0  0  0  0  0  0
   -2.6200   -0.7940   -1.2400 C   0  0  0  0  0  0  0  0  0  0  0  0
   -4.0590   -0.2750   -0.7590 C   0  0  0  0  0  3  0  0  0  0  0  0
   -4.1810    0.9570   -0.8350 O   0  5  0  0  0  0  0  0  0  0  0  0
   -4.8340   -1.1420   -0.3890 O   0  5  0  0  0  0  0  0  0  0  0  0
   -1.6480    1.3580   -0.7280 N   0  0  0  0  0  0  0  0  0  0  0  0
   -0.8090    2.1410    0.0300 C   0  0  0  0  0  0  0  0  0  0  0  0
   -0.7160    3.4950    0.1970 N   0  0  0  0  0  0  0  0  0  0  0  0
    0.3240    3.7070    1.0310 N   0  0  0  0  0  0  0  0  0  0  0  0
    0.9000    2.6070    1.4010 N   0  0  0  0  0  0  0  0  0  0  0  0
    0.2160    1.5770    0.8170 N   0  0  0  0  0  0  0  0  0  0  0  0
    0.5800    0.1530    0.8100 C   0  0  2  0  0  0  0  0  0  0  0  0
    0.7190   -0.1740    1.8820 H   0  0  0  0  0  0  0  0  0  0  0  0
    1.8700   -0.0360    0.0280 C   0  0  0  0  0  0  0  0  0  0  0  0
    1.8890    0.1890   -1.3530 C   0  0  0  0  0  0  0  0  0  0  0  0
    3.0650    0.0150   -2.0740 C   0  0  0  0  0  0  0  0  0  0  0  0
    4.2360   -0.3860   -1.4310 C   0  0  0  0  0  0  0  0  0  0  0  0
    4.1870   -0.6060   -0.0550 C   0  0  0  0  0  0  0  0  0  0  0  0
    5.2840   -1.0000    0.6530 O   0  0  0  0  0  0  0  0  0  0  0  0
    3.0210   -0.4350    0.6980 C   0  0  0  0  0  0  0  0  0  0  0  0
   -2.5290   -2.6290    2.7210 H   0  0  0  0  0  0  0  0  0  0  0  0
   -3.0500   -1.7290    1.2530 H   0  0  0  0  0  0  0  0  0  0  0  0
   -1.8050   -1.0180    2.3580 H   0  0  0  0  0  0  0  0  0  0  0  0
   -2.5620   -1.8820   -1.0710 H   0  0  0  0  0  0  0  0  0  0  0  0
   -2.6110   -0.6440   -2.3330 H   0  0  0  0  0  0  0  0  0  0  0  0
   -2.6140    1.7440   -0.9930 H   0  0  0  0  0  0  0  0  0  0  0  0
    0.9730    0.4870   -1.8630 H   0  0  0  0  0  0  0  0  0  0  0  0
    3.0720    0.1870   -3.1480 H   0  0  0  0  0  0  0  0  0  0  0  0
    5.1530   -0.5270   -1.9860 H   0  0  0  0  0  0  0  0  0  0  0  0
    6.0680   -1.1280    0.0740 H   0  0  0  0  0  0  0  0  0  0  0  0
    3.0350   -0.6160    1.7690 H   0  0  0  0  0  0  0  0  0  0  0  0
  1  2  2  0  0  0  0
  2  3  1  0  0  0  0
  2  5  1  0  0  0  0
  3  4  1  0  0  0  0
  4 26  1  0  0  0  0
  4 27  1  0  0  0  0
  4 28  1  0  0  0  0
  5  6  2  0  0  0  0
  5 17  1  0  0  0  0
  6  7  1  0  0  0  0
  6 11  1  0  0  0  0
  7  8  1  0  0  0  0
  7 29  1  0  0  0  0
  7 30  1  0  0  0  0
  8  9  1  0  0  0  0
  8 10  1  0  0  0  0
 11 12  1  0  0  0  0
 11 31  1  0  0  0  0
 12 13  2  0  0  0  0
 12 16  1  0  0  0  0
 13 14  1  0  0  0  0
 14 15  2  0  0  0  0
 15 16  1  0  0  0  0
 16 17  1  0  0  0  0
 17 18  1  1  0  0  0
 17 19  1  0  0  0  0
 19 20  2  0  0  0  0
 19 25  1  0  0  0  0
 20 21  1  0  0  0  0
 20 32  1  0  0  0  0
 21 22  2  0  0  0  0
 21 33  1  0  0  0  0
 22 23  1  0  0  0  0
 22 34  1  0  0  0  0
 23 24  1  0  0  0  0
 23 25  2  0  0  0  0
 24 35  1  0  0  0  0
 25 36  1  0  0  0  0
M  CHG  2   9  -1  10  -1
M  END
$$$$
RDZ04
 OpenBabel09302314563D

 36 38  0  0  1  0  0  0  0  0999 V2000
   -0.3530   -1.3580    3.0890 O   0  0  0  0  0  0  0  0  0  0  0  0
   -0.4760   -1.3850    1.8860 C   0  0  0  0  0  0  0  0  0  0  0  0
   -0.3340   -2.6180    1.3280 O   0  0  0  0  0  0  0  0  0  0  0  0
   -0.2840   -2.7540   -0.0850 C   0  0  0  0  0  0  0  0  0  0  0  0
   -0.7130   -0.1980    1.0570 C   0  0  0  0  0  0  0  0  0  0  0  0
   -1.8750    0.0160    0.3740 C   0  0  0  0  0  0  0  0  0  0  0  0
   -2.9810   -0.9520    0.2500 C   0  0  0  0  0  0  0  0  0  0  0  0
   -3.2970   -1.2180   -1.3000 C   0  0  0  0  0  3  0  0  0  0  0  0
   -3.4020   -2.3900   -1.6210 O   0  5  0  0  0  0  0  0  0  0  0  0
   -3.3960   -0.1740   -1.9620 O   0  5  0  0  0  0  0  0  0  0  0  0
   -2.1480    1.2420   -0.2480 N   0  0  0  0  0  0  0  0  0  0  0  0
   -1.2200    2.2460   -0.1380 C   0  0  0  0  0  0  0  0  0  0  0  0
   -1.2250    3.5530   -0.5470 N   0  0  0  0  0  0  0  0  0  0  0  0
   -0.0980    4.1100   -0.0570 N   0  0  0  0  0  0  0  0  0  0  0  0
    0.6190    3.2720    0.6240 N   0  0  0  0  0  0  0  0  0  0  0  0
   -0.0390    2.0740    0.6100 N   0  0  0  0  0  0  0  0  0  0  0  0
    0.4240    0.7880    1.1500 C   0  0  2  0  0  0  0  0  0  0  0  0
    0.7060    0.9480    2.2340 H   0  0  0  0  0  0  0  0  0  0  0  0
    1.6170    0.2930    0.3580 C   0  0  0  0  0  0  0  0  0  0  0  0
    2.7810   -0.0630    1.0370 C   0  0  0  0  0  0  0  0  0  0  0  0
    3.8820   -0.5510    0.3350 C   0  0  0  0  0  0  0  0  0  0  0  0
    3.7830   -0.6630   -1.0510 C   0  0  0  0  0  0  0  0  0  0  0  0
    4.8120   -1.1290   -1.8120 O   0  0  0  0  0  0  0  0  0  0  0  0
    2.6270   -0.3100   -1.7560 C   0  0  0  0  0  0  0  0  0  0  0  0
    1.5430    0.1700   -1.0350 C   0  0  0  0  0  0  0  0  0  0  0  0
   -1.3070   -2.9010   -0.4650 H   0  0  0  0  0  0  0  0  0  0  0  0
    0.3110   -3.6620   -0.2240 H   0  0  0  0  0  0  0  0  0  0  0  0
    0.1930   -1.9010   -0.5750 H   0  0  0  0  0  0  0  0  0  0  0  0
   -3.9280   -0.5720    0.6730 H   0  0  0  0  0  0  0  0  0  0  0  0
   -2.7840   -1.9160    0.7460 H   0  0  0  0  0  0  0  0  0  0  0  0
   -2.8480    1.2370   -1.0580 H   0  0  0  0  0  0  0  0  0  0  0  0
    2.8340    0.0310    2.1220 H   0  0  0  0  0  0  0  0  0  0  0  0
    4.7870   -0.8340    0.8560 H   0  0  0  0  0  0  0  0  0  0  0  0
    5.5940   -1.3750   -1.2690 H   0  0  0  0  0  0  0  0  0  0  0  0
    2.5930   -0.4150   -2.8370 H   0  0  0  0  0  0  0  0  0  0  0  0
    0.6240    0.4490   -1.5580 H   0  0  0  0  0  0  0  0  0  0  0  0
  1  2  2  0  0  0  0
  2  3  1  0  0  0  0
  2  5  1  0  0  0  0
  3  4  1  0  0  0  0
  4 26  1  0  0  0  0
  4 27  1  0  0  0  0
  4 28  1  0  0  0  0
  5  6  2  0  0  0  0
  5 17  1  0  0  0  0
  6  7  1  0  0  0  0
  6 11  1  0  0  0  0
  7  8  1  0  0  0  0
  7 29  1  0  0  0  0
  7 30  1  0  0  0  0
  8  9  1  0  0  0  0
  8 10  1  0  0  0  0
 11 12  1  0  0  0  0
 11 31  1  0  0  0  0
 12 13  2  0  0  0  0
 12 16  1  0  0  0  0
 13 14  1  0  0  0  0
 14 15  2  0  0  0  0
 15 16  1  0  0  0  0
 16 17  1  0  0  0  0
 17 18  1  1  0  0  0
 17 19  1  0  0  0  0
 19 20  2  0  0  0  0
 19 25  1  0  0  0  0
 20 21  1  0  0  0  0
 20 32  1  0  0  0  0
 21 22  2  0  0  0  0
 21 33  1  0  0  0  0
 22 23  1  0  0  0  0
 22 24  1  0  0  0  0
 23 34  1  0  0  0  0
 24 25  2  0  0  0  0
 24 35  1  0  0  0  0
 25 36  1  0  0  0  0
M  CHG  2   9  -1  10  -1
M  END
$$$$
RDZ05
 OpenBabel09302314563D

 37 39  0  0  1  0  0  0  0  0999 V2000
   -1.6680    2.5430   -1.7850 O   0  0  0  0  0  0  0  0  0  0  0  0
   -0.7930    1.7560   -1.5060 C   0  0  0  0  0  0  0  0  0  0  0  0
    0.5210    2.0730   -1.7550 O   0  0  0  0  0  0  0  0  0  0  0  0
    0.7430    3.3590   -2.3130 C   0  0  0  0  0  0  0  0  0  0  0  0
   -0.8940    0.4310   -0.9380 C   0  0  0  0  0  0  0  0  0  0  0  0
   -2.0350    0.0250   -0.2750 C   0  0  0  0  0  0  0  0  0  0  0  0
   -3.1240    0.9140    0.1620 C   0  0  0  0  0  0  0  0  0  0  0  0
   -3.4350    0.7280    1.7220 C   0  0  0  0  0  3  0  0  0  0  0  0
   -3.6290    1.7580    2.3460 O   0  5  0  0  0  0  0  0  0  0  0  0
   -3.4570   -0.4590    2.0870 O   0  5  0  0  0  0  0  0  0  0  0  0
   -2.2480   -1.3160    0.0310 N   0  0  0  0  0  0  0  0  0  0  0  0
   -1.2830   -2.2340   -0.3200 C   0  0  0  0  0  0  0  0  0  0  0  0
   -1.2640   -3.6020   -0.2850 N   0  0  0  0  0  0  0  0  0  0  0  0
   -0.0950   -3.9780   -0.8410 N   0  0  0  0  0  0  0  0  0  0  0  0
    0.6230   -2.9660   -1.2270 N   0  0  0  0  0  0  0  0  0  0  0  0
   -0.0760   -1.8360   -0.9200 N   0  0  0  0  0  0  0  0  0  0  0  0
    0.3400   -0.4280   -1.0850 C   0  0  2  0  0  0  0  0  0  0  0  0
    0.7740   -0.3180   -2.1210 H   0  0  0  0  0  0  0  0  0  0  0  0
    1.3660   -0.1060   -0.0260 C   0  0  0  0  0  0  0  0  0  0  0  0
    0.9780    0.3030    1.2510 C   0  0  0  0  0  0  0  0  0  0  0  0
    1.9190    0.5950    2.2350 C   0  0  0  0  0  0  0  0  0  0  0  0
    3.2730    0.4730    1.9180 C   0  0  0  0  0  0  0  0  0  0  0  0
    4.2510    0.7460    2.8230 O   0  0  0  0  0  0  0  0  0  0  0  0
    3.7190    0.0690    0.6600 C   0  0  0  0  0  0  0  0  0  0  0  0
    2.7400   -0.2130   -0.2960 C   0  0  0  0  0  0  0  0  0  0  0  0
    3.0840   -0.5990   -1.5470 O   0  0  0  0  0  0  0  0  0  0  0  0
    1.8320    3.4000   -2.4110 H   0  0  0  0  0  0  0  0  0  0  0  0
    0.3730    4.1340   -1.6330 H   0  0  0  0  0  0  0  0  0  0  0  0
    0.2500    3.4420   -3.2860 H   0  0  0  0  0  0  0  0  0  0  0  0
   -4.0800    0.7100   -0.3500 H   0  0  0  0  0  0  0  0  0  0  0  0
   -2.9120    1.9860   -0.0150 H   0  0  0  0  0  0  0  0  0  0  0  0
   -2.9360   -1.5510    0.8160 H   0  0  0  0  0  0  0  0  0  0  0  0
   -0.0900    0.4000    1.4890 H   0  0  0  0  0  0  0  0  0  0  0  0
    1.5990    0.9100    3.2210 H   0  0  0  0  0  0  0  0  0  0  0  0
    3.8810    1.0080    3.6980 H   0  0  0  0  0  0  0  0  0  0  0  0
    4.7730   -0.0180    0.4470 H   0  0  0  0  0  0  0  0  0  0  0  0
    4.0560   -0.7430   -1.6390 H   0  0  0  0  0  0  0  0  0  0  0  0
  1  2  2  0  0  0  0
  2  3  1  0  0  0  0
  2  5  1  0  0  0  0
  3  4  1  0  0  0  0
  4 27  1  0  0  0  0
  4 28  1  0  0  0  0
  4 29  1  0  0  0  0
  5  6  2  0  0  0  0
  5 17  1  0  0  0  0
  6  7  1  0  0  0  0
  6 11  1  0  0  0  0
  7  8  1  0  0  0  0
  7 30  1  0  0  0  0
  7 31  1  0  0  0  0
  8  9  1  0  0  0  0
  8 10  1  0  0  0  0
 11 12  1  0  0  0  0
 11 32  1  0  0  0  0
 12 13  2  0  0  0  0
 12 16  1  0  0  0  0
 13 14  1  0  0  0  0
 14 15  2  0  0  0  0
 15 16  1  0  0  0  0
 16 17  1  0  0  0  0
 17 18  1  6  0  0  0
 17 19  1  0  0  0  0
 19 20  2  0  0  0  0
 19 25  1  0  0  0  0
 20 21  1  0  0  0  0
 20 33  1  0  0  0  0
 21 22  2  0  0  0  0
 21 34  1  0  0  0  0
 22 23  1  0  0  0  0
 22 24  1  0  0  0  0
 23 35  1  0  0  0  0
 24 25  2  0  0  0  0
 24 36  1  0  0  0  0
 25 26  1  0  0  0  0
 26 37  1  0  0  0  0
M  CHG  2   9  -1  10  -1
M  END
$$$$
RDZ06
 OpenBabel09302314563D

 37 39  0  0  1  0  0  0  0  0999 V2000
   -1.0030   -1.5690    1.9450 O   0  0  0  0  0  0  0  0  0  0  0  0
   -1.6640   -0.7240    1.3900 C   0  0  0  0  0  0  0  0  0  0  0  0
   -3.0080   -0.6100    1.6100 O   0  0  0  0  0  0  0  0  0  0  0  0
   -3.6330   -1.8120    2.0460 C   0  0  0  0  0  0  0  0  0  0  0  0
   -1.1500    0.3950    0.5950 C   0  0  0  0  0  0  0  0  0  0  0  0
   -1.8370    0.9370   -0.4520 C   0  0  0  0  0  0  0  0  0  0  0  0
   -3.1020    0.4730   -1.0250 C   0  0  0  0  0  0  0  0  0  0  0  0
   -2.9850   -1.0860   -1.4760 C   0  0  0  0  0  3  0  0  0  0  0  0
   -2.2530   -1.7670   -0.7630 O   0  5  0  0  0  0  0  0  0  0  0  0
   -3.6670   -1.3560   -2.4550 O   0  5  0  0  0  0  0  0  0  0  0  0
   -1.3190    2.0780   -1.1120 N   0  0  0  0  0  0  0  0  0  0  0  0
   -0.2120    2.6980   -0.5880 C   0  0  0  0  0  0  0  0  0  0  0  0
    0.3650    3.9160   -0.8410 N   0  0  0  0  0  0  0  0  0  0  0  0
    1.3790    4.0380    0.0390 N   0  0  0  0  0  0  0  0  0  0  0  0
    1.4870    3.0070    0.8200 N   0  0  0  0  0  0  0  0  0  0  0  0
    0.5070    2.1240    0.4690 N   0  0  0  0  0  0  0  0  0  0  0  0
    0.2660    0.7570    0.9770 C   0  0  2  0  0  0  0  0  0  0  0  0
    0.3800    0.7650    2.1000 H   0  0  0  0  0  0  0  0  0  0  0  0
    1.3030   -0.1820    0.3850 C   0  0  0  0  0  0  0  0  0  0  0  0
    0.9260   -1.2500   -0.4270 C   0  0  0  0  0  0  0  0  0  0  0  0
    1.8870   -2.1160   -0.9490 C   0  0  0  0  0  0  0  0  0  0  0  0
    3.2220   -1.9020   -0.6380 C   0  0  0  0  0  0  0  0  0  0  0  0
    4.2400   -2.6940   -1.0980 O   0  0  0  0  0  0  0  0  0  0  0  0
    3.6090   -0.8340    0.1880 C   0  0  0  0  0  0  0  0  0  0  0  0
    4.9070   -0.5920    0.5270 O   0  0  0  0  0  0  0  0  0  0  0  0
    2.6480    0.0300    0.7040 C   0  0  0  0  0  0  0  0  0  0  0  0
   -4.6930   -1.5500    2.0720 H   0  0  0  0  0  0  0  0  0  0  0  0
   -3.2580   -2.0990    3.0310 H   0  0  0  0  0  0  0  0  0  0  0  0
   -3.4380   -2.6070    1.3100 H   0  0  0  0  0  0  0  0  0  0  0  0
   -3.4500    1.0300   -1.9060 H   0  0  0  0  0  0  0  0  0  0  0  0
   -3.9410    0.4730   -0.3110 H   0  0  0  0  0  0  0  0  0  0  0  0
   -1.7330    2.4330   -1.9630 H   0  0  0  0  0  0  0  0  0  0  0  0
   -0.1410   -1.4420   -0.6490 H   0  0  0  0  0  0  0  0  0  0  0  0
    1.5820   -2.9470   -1.5780 H   0  0  0  0  0  0  0  0  0  0  0  0
    3.8950   -3.4180   -1.6690 H   0  0  0  0  0  0  0  0  0  0  0  0
    5.5080   -1.2430    0.0900 H   0  0  0  0  0  0  0  0  0  0  0  0
    2.9590    0.8600    1.3380 H   0  0  0  0  0  0  0  0  0  0  0  0
  1  2  2  0  0  0  0
  2  3  1  0  0  0  0
  2  5  1  0  0  0  0
  3  4  1  0  0  0  0
  4 27  1  0  0  0  0
  4 28  1  0  0  0  0
  4 29  1  0  0  0  0
  5  6  2  0  0  0  0
  5 17  1  0  0  0  0
  6  7  1  0  0  0  0
  6 11  1  0  0  0  0
  7  8  1  0  0  0  0
  7 30  1  0  0  0  0
  7 31  1  0  0  0  0
  8  9  1  0  0  0  0
  8 10  1  0  0  0  0
 11 12  1  0  0  0  0
 11 32  1  0  0  0  0
 12 13  2  0  0  0  0
 12 16  1  0  0  0  0
 13 14  1  0  0  0  0
 14 15  2  0  0  0  0
 15 16  1  0  0  0  0
 16 17  1  0  0  0  0
 17 18  1  1  0  0  0
 17 19  1  0  0  0  0
 19 20  2  0  0  0  0
 19 26  1  0  0  0  0
 20 21  1  0  0  0  0
 20 33  1  0  0  0  0
 21 22  2  0  0  0  0
 21 34  1  0  0  0  0
 22 23  1  0  0  0  0
 22 24  1  0  0  0  0
 23 35  1  0  0  0  0
 24 25  1  0  0  0  0
 24 26  2  0  0  0  0
 25 36  1  0  0  0  0
 26 37  1  0  0  0  0
M  CHG  2   9  -1  10  -1
M  END
$$$$
RDZ07
 OpenBabel09302314563D

 40 42  0  0  1  0  0  0  0  0999 V2000
   -0.6160   -2.4420   -0.0620 O   0  0  0  0  0  0  0  0  0  0  0  0
    0.3980   -1.9150   -0.4520 C   0  0  0  0  0  0  0  0  0  0  0  0
    1.1920   -2.7200   -1.2160 O   0  0  0  0  0  0  0  0  0  0  0  0
    2.4290   -2.2210   -1.7020 C   0  0  0  0  0  0  0  0  0  0  0  0
    0.7920   -0.5180   -0.2450 C   0  0  0  0  0  0  0  0  0  0  0  0
    1.7920   -0.1660    0.6150 C   0  0  0  0  0  0  0  0  0  0  0  0
    2.5250   -1.1150    1.4720 C   0  0  0  0  0  0  0  0  0  0  0  0
    4.1060   -0.9740    1.2460 C   0  0  0  0  0  3  0  0  0  0  0  0
    4.5040    0.1990    1.3100 O   0  5  0  0  0  0  0  0  0  0  0  0
    4.7030   -2.0190    1.0450 O   0  5  0  0  0  0  0  0  0  0  0  0
    2.1950    1.1720    0.7660 N   0  0  0  0  0  0  0  0  0  0  0  0
    1.7040    2.0820   -0.1400 C   0  0  0  0  0  0  0  0  0  0  0  0
    2.0090    3.3910   -0.3930 N   0  0  0  0  0  0  0  0  0  0  0  0
    1.1790    3.7930   -1.3780 N   0  0  0  0  0  0  0  0  0  0  0  0
    0.3720    2.8570   -1.7670 N   0  0  0  0  0  0  0  0  0  0  0  0
    0.6660    1.7420   -1.0320 N   0  0  0  0  0  0  0  0  0  0  0  0
   -0.0640    0.4690   -1.0000 C   0  0  2  0  0  0  0  0  0  0  0  0
   -0.2190    0.1380   -2.0680 H   0  0  0  0  0  0  0  0  0  0  0  0
   -1.4070    0.6040   -0.3040 C   0  0  0  0  0  0  0  0  0  0  0  0
   -1.6500    1.5610    0.6730 C   0  0  0  0  0  0  0  0  0  0  0  0
   -2.8870    1.6060    1.3220 C   0  0  0  0  0  0  0  0  0  0  0  0
   -3.8550    0.6590    1.0110 C   0  0  0  0  0  0  0  0  0  0  0  0
   -5.0770    0.6280    1.6120 O   0  0  0  0  0  0  0  0  0  0  0  0
   -3.6040   -0.3320    0.0380 C   0  0  0  0  0  0  0  0  0  0  0  0
   -4.6150   -1.2210   -0.1820 O   0  0  0  0  0  0  0  0  0  0  0  0
   -4.1850   -2.4980   -0.6510 C   0  0  0  0  0  0  0  0  0  0  0  0
   -2.3930   -0.3300   -0.6410 C   0  0  0  0  0  0  0  0  0  0  0  0
    3.1710   -2.2200   -0.8880 H   0  0  0  0  0  0  0  0  0  0  0  0
    2.3260   -1.2270   -2.1440 H   0  0  0  0  0  0  0  0  0  0  0  0
    2.7060   -2.9610   -2.4610 H   0  0  0  0  0  0  0  0  0  0  0  0
    2.2370   -2.1670    1.3060 H   0  0  0  0  0  0  0  0  0  0  0  0
    2.3700   -0.9150    2.5470 H   0  0  0  0  0  0  0  0  0  0  0  0
    3.1690    1.3370    1.1860 H   0  0  0  0  0  0  0  0  0  0  0  0
   -0.8830    2.2840    0.9490 H   0  0  0  0  0  0  0  0  0  0  0  0
   -3.0790    2.3640    2.0740 H   0  0  0  0  0  0  0  0  0  0  0  0
   -5.1510    1.3360    2.2960 H   0  0  0  0  0  0  0  0  0  0  0  0
   -5.0370   -3.1410   -0.4070 H   0  0  0  0  0  0  0  0  0  0  0  0
   -3.2800   -2.8450   -0.1300 H   0  0  0  0  0  0  0  0  0  0  0  0
   -4.0200   -2.4580   -1.7310 H   0  0  0  0  0  0  0  0  0  0  0  0
   -2.1990   -1.0770   -1.4100 H   0  0  0  0  0  0  0  0  0  0  0  0
  1  2  2  0  0  0  0
  2  3  1  0  0  0  0
  2  5  1  0  0  0  0
  3  4  1  0  0  0  0
  4 28  1  0  0  0  0
  4 29  1  0  0  0  0
  4 30  1  0  0  0  0
  5  6  2  0  0  0  0
  5 17  1  0  0  0  0
  6  7  1  0  0  0  0
  6 11  1  0  0  0  0
  7  8  1  0  0  0  0
  7 31  1  0  0  0  0
  7 32  1  0  0  0  0
  8  9  1  0  0  0  0
  8 10  1  0  0  0  0
 11 12  1  0  0  0  0
 11 33  1  0  0  0  0
 12 13  2  0  0  0  0
 12 16  1  0  0  0  0
 13 14  1  0  0  0  0
 14 15  2  0  0  0  0
 15 16  1  0  0  0  0
 16 17  1  0  0  0  0
 17 18  1  6  0  0  0
 17 19  1  0  0  0  0
 19 20  2  0  0  0  0
 19 27  1  0  0  0  0
 20 21  1  0  0  0  0
 20 34  1  0  0  0  0
 21 22  2  0  0  0  0
 21 35  1  0  0  0  0
 22 23  1  0  0  0  0
 22 24  1  0  0  0  0
 23 36  1  0  0  0  0
 24 25  1  0  0  0  0
 24 27  2  0  0  0  0
 25 26  1  0  0  0  0
 26 37  1  0  0  0  0
 26 38  1  0  0  0  0
 26 39  1  0  0  0  0
 27 40  1  0  0  0  0
M  CHG  2   9  -1  10  -1
M  END
$$$$
RDZ08
 OpenBabel09302314563D

 39 41  0  0  1  0  0  0  0  0999 V2000
    0.4610   -2.6960    0.9900 O   0  0  0  0  0  0  0  0  0  0  0  0
   -0.5200   -1.9910    0.8640 C   0  0  0  0  0  0  0  0  0  0  0  0
   -1.7700   -2.5370    0.9830 O   0  0  0  0  0  0  0  0  0  0  0  0
   -1.8070   -3.9460    1.1610 C   0  0  0  0  0  0  0  0  0  0  0  0
   -0.5620   -0.5680    0.6520 C   0  0  0  0  0  0  0  0  0  0  0  0
   -1.7140    0.1380    0.3380 C   0  0  0  0  0  0  0  0  0  0  0  0
   -2.9540   -0.4710   -0.1800 C   0  0  0  0  0  0  0  0  0  0  0  0
   -3.6690    0.3500   -1.3490 C   0  0  0  0  0  3  0  0  0  0  0  0
   -3.4930    1.5780   -1.3100 O   0  5  0  0  0  0  0  0  0  0  0  0
   -4.3230   -0.3330   -2.1210 O   0  5  0  0  0  0  0  0  0  0  0  0
   -1.7730    1.5060    0.5400 N   0  0  0  0  0  0  0  0  0  0  0  0
   -0.6680    2.1500    1.0570 C   0  0  0  0  0  0  0  0  0  0  0  0
   -0.4890    3.4110    1.5530 N   0  0  0  0  0  0  0  0  0  0  0  0
    0.7820    3.4630    2.0020 N   0  0  0  0  0  0  0  0  0  0  0  0
    1.4160    2.3420    1.8360 N   0  0  0  0  0  0  0  0  0  0  0  0
    0.5530    1.4770    1.2350 N   0  0  0  0  0  0  0  0  0  0  0  0
    0.7880    0.0920    0.7880 C   0  0  2  0  0  0  0  0  0  0  0  0
    1.4140   -0.4310    1.5700 H   0  0  0  0  0  0  0  0  0  0  0  0
    1.5160    0.1360   -0.5390 C   0  0  0  0  0  0  0  0  0  0  0  0
    0.8650    0.5420   -1.7050 C   0  0  0  0  0  0  0  0  0  0  0  0
    1.5450    0.5860   -2.9200 C   0  0  0  0  0  0  0  0  0  0  0  0
    2.8900    0.2230   -2.9870 C   0  0  0  0  0  0  0  0  0  0  0  0
    3.5590   -0.1920   -1.8400 C   0  0  0  0  0  0  0  0  0  0  0  0
    2.8630   -0.2280   -0.6290 C   0  0  0  0  0  0  0  0  0  0  0  0
    3.5690   -0.5320    0.5120 O   0  0  0  0  0  0  0  0  0  0  0  0
    3.6080   -1.9350    0.7670 C   0  0  0  0  0  0  0  0  0  0  0  0
   -2.8800   -4.1610    1.1950 H   0  0  0  0  0  0  0  0  0  0  0  0
   -1.3120   -4.2230    2.0960 H   0  0  0  0  0  0  0  0  0  0  0  0
   -1.3260   -4.4490    0.3160 H   0  0  0  0  0  0  0  0  0  0  0  0
   -3.7220   -0.5850    0.6050 H   0  0  0  0  0  0  0  0  0  0  0  0
   -2.7840   -1.4910   -0.5830 H   0  0  0  0  0  0  0  0  0  0  0  0
   -2.5420    2.0750    0.0680 H   0  0  0  0  0  0  0  0  0  0  0  0
   -0.1920    0.8240   -1.6720 H   0  0  0  0  0  0  0  0  0  0  0  0
    1.0210    0.9040   -3.8180 H   0  0  0  0  0  0  0  0  0  0  0  0
    3.4180    0.2640   -3.9360 H   0  0  0  0  0  0  0  0  0  0  0  0
    4.6040   -0.4750   -1.8660 H   0  0  0  0  0  0  0  0  0  0  0  0
    4.0710   -1.9870    1.7570 H   0  0  0  0  0  0  0  0  0  0  0  0
    4.2190   -2.4380    0.0150 H   0  0  0  0  0  0  0  0  0  0  0  0
    2.5940   -2.3600    0.7930 H   0  0  0  0  0  0  0  0  0  0  0  0
  1  2  2  0  0  0  0
  2  3  1  0  0  0  0
  2  5  1  0  0  0  0
  3  4  1  0  0  0  0
  4 27  1  0  0  0  0
  4 28  1  0  0  0  0
  4 29  1  0  0  0  0
  5  6  2  0  0  0  0
  5 17  1  0  0  0  0
  6  7  1  0  0  0  0
  6 11  1  0  0  0  0
  7  8  1  0  0  0  0
  7 30  1  0  0  0  0
  7 31  1  0  0  0  0
  8  9  1  0  0  0  0
  8 10  1  0  0  0  0
 11 12  1  0  0  0  0
 11 32  1  0  0  0  0
 12 13  2  0  0  0  0
 12 16  1  0  0  0  0
 13 14  1  0  0  0  0
 14 15  2  0  0  0  0
 15 16  1  0  0  0  0
 16 17  1  0  0  0  0
 17 18  1  1  0  0  0
 17 19  1  0  0  0  0
 19 20  2  0  0  0  0
 19 24  1  0  0  0  0
 20 21  1  0  0  0  0
 20 33  1  0  0  0  0
 21 22  2  0  0  0  0
 21 34  1  0  0  0  0
 22 23  1  0  0  0  0
 22 35  1  0  0  0  0
 23 24  2  0  0  0  0
 23 36  1  0  0  0  0
 24 25  1  0  0  0  0
 25 26  1  0  0  0  0
 26 37  1  0  0  0  0
 26 38  1  0  0  0  0
 26 39  1  0  0  0  0
M  CHG  2   9  -1  10  -1
M  END
$$$$
RDZ09
 OpenBabel09302314563D

 43 45  0  0  1  0  0  0  0  0999 V2000
   -1.1830   -3.1650    0.5340 O   0  0  0  0  0  0  0  0  0  0  0  0
   -1.7200   -2.0930    0.3460 C   0  0  0  0  0  0  0  0  0  0  0  0
   -3.0090   -2.0440   -0.1110 O   0  0  0  0  0  0  0  0  0  0  0  0
   -3.5940   -3.3000   -0.4230 C   0  0  0  0  0  0  0  0  0  0  0  0
   -1.1710   -0.7880    0.6210 C   0  0  0  0  0  0  0  0  0  0  0  0
   -1.7300    0.4200    0.2390 C   0  0  0  0  0  0  0  0  0  0  0  0
   -2.7950    0.5380   -0.7840 C   0  0  0  0  0  0  0  0  0  0  0  0
   -2.9780    1.9210   -1.5390 C   0  0  0  0  0  3  0  0  0  0  0  0
   -2.3180    2.8820   -1.1070 O   0  5  0  0  0  0  0  0  0  0  0  0
   -3.7620    1.8750   -2.4770 O   0  5  0  0  0  0  0  0  0  0  0  0
   -1.3510    1.5940    0.8640 N   0  0  0  0  0  0  0  0  0  0  0  0
   -0.3230    1.5610    1.7830 C   0  0  0  0  0  0  0  0  0  0  0  0
    0.2030    2.5210    2.6050 N   0  0  0  0  0  0  0  0  0  0  0  0
    1.1440    1.9070    3.3490 N   0  0  0  0  0  0  0  0  0  0  0  0
    1.2550    0.6430    3.0720 N   0  0  0  0  0  0  0  0  0  0  0  0
    0.3470    0.3670    2.0920 N   0  0  0  0  0  0  0  0  0  0  0  0
    0.1370   -0.8950    1.3700 C   0  0  2  0  0  0  0  0  0  0  0  0
    0.0880   -1.7230    2.1400 H   0  0  0  0  0  0  0  0  0  0  0  0
    1.2760   -1.1590    0.4100 C   0  0  0  0  0  0  0  0  0  0  0  0
    1.8440   -2.4330    0.3820 C   0  0  0  0  0  0  0  0  0  0  0  0
    2.8970   -2.7280   -0.4800 C   0  0  0  0  0  0  0  0  0  0  0  0
    3.4220   -1.7380   -1.3080 C   0  0  0  0  0  0  0  0  0  0  0  0
    2.8550   -0.4670   -1.2920 C   0  0  0  0  0  0  0  0  0  0  0  0
    3.3580    0.4720   -2.1630 O   0  0  0  0  0  0  0  0  0  0  0  0
    4.1720    1.4310   -1.4850 C   0  0  0  0  0  0  0  0  0  0  0  0
    1.7530   -0.1790   -0.4710 C   0  0  0  0  0  0  0  0  0  0  0  0
    1.1490    1.0370   -0.4090 O   0  0  0  0  0  0  0  0  0  0  0  0
    0.8950    1.6630   -1.6700 C   0  0  0  0  0  0  0  0  0  0  0  0
   -4.5850   -3.0230   -0.7980 H   0  0  0  0  0  0  0  0  0  0  0  0
   -3.6640   -3.9190    0.4760 H   0  0  0  0  0  0  0  0  0  0  0  0
   -3.0050   -3.8150   -1.1890 H   0  0  0  0  0  0  0  0  0  0  0  0
   -3.7890    0.3060   -0.3510 H   0  0  0  0  0  0  0  0  0  0  0  0
   -2.6430   -0.2030   -1.5980 H   0  0  0  0  0  0  0  0  0  0  0  0
   -1.6460    2.5350    0.4600 H   0  0  0  0  0  0  0  0  0  0  0  0
    1.4340   -3.2150    1.0260 H   0  0  0  0  0  0  0  0  0  0  0  0
    3.3130   -3.7300   -0.5020 H   0  0  0  0  0  0  0  0  0  0  0  0
    4.2620   -1.9410   -1.9650 H   0  0  0  0  0  0  0  0  0  0  0  0
    4.4100    2.1510   -2.2740 H   0  0  0  0  0  0  0  0  0  0  0  0
    5.0770    0.9510   -1.1060 H   0  0  0  0  0  0  0  0  0  0  0  0
    3.6190    1.9120   -0.6680 H   0  0  0  0  0  0  0  0  0  0  0  0
   -0.0410    2.2190   -1.4840 H   0  0  0  0  0  0  0  0  0  0  0  0
    0.7560    0.9420   -2.4790 H   0  0  0  0  0  0  0  0  0  0  0  0
    1.7140    2.3490   -1.8940 H   0  0  0  0  0  0  0  0  0  0  0  0
  1  2  2  0  0  0  0
  2  3  1  0  0  0  0
  2  5  1  0  0  0  0
  3  4  1  0  0  0  0
  4 29  1  0  0  0  0
  4 30  1  0  0  0  0
  4 31  1  0  0  0  0
  5  6  2  0  0  0  0
  5 17  1  0  0  0  0
  6  7  1  0  0  0  0
  6 11  1  0  0  0  0
  7  8  1  0  0  0  0
  7 32  1  0  0  0  0
  7 33  1  0  0  0  0
  8  9  1  0  0  0  0
  8 10  1  0  0  0  0
 11 12  1  0  0  0  0
 11 34  1  0  0  0  0
 12 13  2  0  0  0  0
 12 16  1  0  0  0  0
 13 14  1  0  0  0  0
 14 15  2  0  0  0  0
 15 16  1  0  0  0  0
 16 17  1  0  0  0  0
 17 18  1  1  0  0  0
 17 19  1  0  0  0  0
 19 20  2  0  0  0  0
 19 26  1  0  0  0  0
 20 21  1  0  0  0  0
 20 35  1  0  0  0  0
 21 22  2  0  0  0  0
 21 36  1  0  0  0  0
 22 23  1  0  0  0  0
 22 37  1  0  0  0  0
 23 24  1  0  0  0  0
 23 26  2  0  0  0  0
 24 25  1  0  0  0  0
 25 38  1  0  0  0  0
 25 39  1  0  0  0  0
 25 40  1  0  0  0  0
 26 27  1  0  0  0  0
 27 28  1  0  0  0  0
 28 41  1  0  0  0  0
 28 42  1  0  0  0  0
 28 43  1  0  0  0  0
M  CHG  2   9  -1  10  -1
M  END
$$$$
RDZ10
 OpenBabel09302314563D

 43 45  0  0  1  0  0  0  0  0999 V2000
    1.1990   -3.3940    0.0100 O   0  0  0  0  0  0  0  0  0  0  0  0
    0.6390   -2.4760   -0.5440 C   0  0  0  0  0  0  0  0  0  0  0  0
   -0.5430   -2.7040   -1.2150 O   0  0  0  0  0  0  0  0  0  0  0  0
   -1.0480   -4.0260   -1.1210 C   0  0  0  0  0  0  0  0  0  0  0  0
    1.0340   -1.0940   -0.6630 C   0  0  0  0  0  0  0  0  0  0  0  0
    2.0480   -0.5700    0.1150 C   0  0  0  0  0  0  0  0  0  0  0  0
    2.6440   -1.2350    1.2920 C   0  0  0  0  0  0  0  0  0  0  0  0
    2.7140   -0.2310    2.5230 C   0  0  0  0  0  3  0  0  0  0  0  0
    2.1600   -0.5890    3.5520 O   0  5  0  0  0  0  0  0  0  0  0  0
    3.3250    0.8250    2.2730 O   0  5  0  0  0  0  0  0  0  0  0  0
    2.6310    0.6560   -0.1950 N   0  0  0  0  0  0  0  0  0  0  0  0
    2.0650    1.4190   -1.1930 C   0  0  0  0  0  0  0  0  0  0  0  0
    2.4260    2.6190   -1.7440 N   0  0  0  0  0  0  0  0  0  0  0  0
    1.5620    2.8460   -2.7540 N   0  0  0  0  0  0  0  0  0  0  0  0
    0.6900    1.8930   -2.8870 N   0  0  0  0  0  0  0  0  0  0  0  0
    0.9620    0.9610   -1.9300 N   0  0  0  0  0  0  0  0  0  0  0  0
    0.2020   -0.2610   -1.6110 C   0  0  2  0  0  0  0  0  0  0  0  0
    0.0320   -0.8060   -2.5850 H   0  0  0  0  0  0  0  0  0  0  0  0
   -1.1140    0.0820   -0.9600 C   0  0  0  0  0  0  0  0  0  0  0  0
   -2.3050   -0.3410   -1.5430 C   0  0  0  0  0  0  0  0  0  0  0  0
   -3.5290   -0.1370   -0.9150 C   0  0  0  0  0  0  0  0  0  0  0  0
   -3.5400    0.4990    0.3340 C   0  0  0  0  0  0  0  0  0  0  0  0
   -4.7940    0.6230    0.8540 O   0  0  0  0  0  0  0  0  0  0  0  0
   -4.9020    1.2070    2.1440 C   0  0  0  0  0  0  0  0  0  0  0  0
   -2.3770    0.9490    0.9520 C   0  0  0  0  0  0  0  0  0  0  0  0
   -1.1670    0.7470    0.2830 C   0  0  0  0  0  0  0  0  0  0  0  0
    0.0300    1.1820    0.7230 O   0  0  0  0  0  0  0  0  0  0  0  0
    0.1340    1.6000    2.0820 C   0  0  0  0  0  0  0  0  0  0  0  0
   -1.9870   -3.9740   -1.6810 H   0  0  0  0  0  0  0  0  0  0  0  0
   -1.2250   -4.2880   -0.0720 H   0  0  0  0  0  0  0  0  0  0  0  0
   -0.3480   -4.7340   -1.5730 H   0  0  0  0  0  0  0  0  0  0  0  0
    3.6770   -1.5780    1.1110 H   0  0  0  0  0  0  0  0  0  0  0  0
    2.0780   -2.1330    1.6120 H   0  0  0  0  0  0  0  0  0  0  0  0
    3.2370    1.1330    0.5460 H   0  0  0  0  0  0  0  0  0  0  0  0
   -2.2760   -0.8630   -2.5020 H   0  0  0  0  0  0  0  0  0  0  0  0
   -4.4540   -0.4680   -1.3680 H   0  0  0  0  0  0  0  0  0  0  0  0
   -5.9800    1.1620    2.3350 H   0  0  0  0  0  0  0  0  0  0  0  0
   -4.5580    2.2460    2.1280 H   0  0  0  0  0  0  0  0  0  0  0  0
   -4.3550    0.6150    2.8860 H   0  0  0  0  0  0  0  0  0  0  0  0
   -2.3960    1.4370    1.9150 H   0  0  0  0  0  0  0  0  0  0  0  0
    1.1900    1.9240    2.1410 H   0  0  0  0  0  0  0  0  0  0  0  0
   -0.0090    0.7420    2.7540 H   0  0  0  0  0  0  0  0  0  0  0  0
   -0.5350    2.4290    2.3040 H   0  0  0  0  0  0  0  0  0  0  0  0
  1  2  2  0  0  0  0
  2  3  1  0  0  0  0
  2  5  1  0  0  0  0
  3  4  1  0  0  0  0
  4 29  1  0  0  0  0
  4 30  1  0  0  0  0
  4 31  1  0  0  0  0
  5  6  2  0  0  0  0
  5 17  1  0  0  0  0
  6  7  1  0  0  0  0
  6 11  1  0  0  0  0
  7  8  1  0  0  0  0
  7 32  1  0  0  0  0
  7 33  1  0  0  0  0
  8  9  1  0  0  0  0
  8 10  1  0  0  0  0
 11 12  1  0  0  0  0
 11 34  1  0  0  0  0
 12 13  2  0  0  0  0
 12 16  1  0  0  0  0
 13 14  1  0  0  0  0
 14 15  2  0  0  0  0
 15 16  1  0  0  0  0
 16 17  1  0  0  0  0
 17 18  1  6  0  0  0
 17 19  1  0  0  0  0
 19 20  2  0  0  0  0
 19 26  1  0  0  0  0
 20 21  1  0  0  0  0
 20 35  1  0  0  0  0
 21 22  2  0  0  0  0
 21 36  1  0  0  0  0
 22 23  1  0  0  0  0
 22 25  1  0  0  0  0
 23 24  1  0  0  0  0
 24 37  1  0  0  0  0
 24 38  1  0  0  0  0
 24 39  1  0  0  0  0
 25 26  2  0  0  0  0
 25 40  1  0  0  0  0
 26 27  1  0  0  0  0
 27 28  1  0  0  0  0
 28 41  1  0  0  0  0
 28 42  1  0  0  0  0
 28 43  1  0  0  0  0
M  CHG  2   9  -1  10  -1
M  END
$$$$
RDZ11
 OpenBabel09302314563D

 43 45  0  0  1  0  0  0  0  0999 V2000
   -0.2410   -1.4330   -3.2010 O   0  0  0  0  0  0  0  0  0  0  0  0
    0.0680   -1.4560   -2.0320 C   0  0  0  0  0  0  0  0  0  0  0  0
   -0.1570   -2.6490   -1.4110 O   0  0  0  0  0  0  0  0  0  0  0  0
   -0.1440   -2.7090    0.0070 C   0  0  0  0  0  0  0  0  0  0  0  0
    0.6270   -0.3140   -1.3050 C   0  0  0  0  0  0  0  0  0  0  0  0
    1.9200   -0.2630   -0.8710 C   0  0  0  0  0  0  0  0  0  0  0  0
    2.8480   -1.4130   -0.8180 C   0  0  0  0  0  0  0  0  0  0  0  0
    3.3410   -1.5570    0.6940 C   0  0  0  0  0  3  0  0  0  0  0  0
    3.0540   -2.5990    1.2640 O   0  5  0  0  0  0  0  0  0  0  0  0
    3.9300   -0.5440    1.1090 O   0  5  0  0  0  0  0  0  0  0  0  0
    2.5150    0.9380   -0.4550 N   0  0  0  0  0  0  0  0  0  0  0  0
    1.7220    2.0600   -0.3980 C   0  0  0  0  0  0  0  0  0  0  0  0
    2.0000    3.3640   -0.0840 N   0  0  0  0  0  0  0  0  0  0  0  0
    0.8710    4.0620   -0.3260 N   0  0  0  0  0  0  0  0  0  0  0  0
   -0.0950    3.3160   -0.7640 N   0  0  0  0  0  0  0  0  0  0  0  0
    0.3860    2.0390   -0.8410 N   0  0  0  0  0  0  0  0  0  0  0  0
   -0.3620    0.8140   -1.1450 C   0  0  2  0  0  0  0  0  0  0  0  0
   -0.9260    0.9820   -2.1100 H   0  0  0  0  0  0  0  0  0  0  0  0
   -1.3170    0.4770   -0.0180 C   0  0  0  0  0  0  0  0  0  0  0  0
   -2.6680    0.3040   -0.2990 C   0  0  0  0  0  0  0  0  0  0  0  0
   -3.5280   -0.1010    0.7200 C   0  0  0  0  0  0  0  0  0  0  0  0
   -4.8730   -0.3140    0.5790 O   0  0  0  0  0  0  0  0  0  0  0  0
   -5.3780   -0.2850   -0.7470 C   0  0  0  0  0  0  0  0  0  0  0  0
   -3.0700   -0.3240    2.0250 C   0  0  0  0  0  0  0  0  0  0  0  0
   -1.7250   -0.1340    2.3100 C   0  0  0  0  0  0  0  0  0  0  0  0
   -0.8540    0.2690    1.2930 C   0  0  0  0  0  0  0  0  0  0  0  0
    0.4660    0.5270    1.4650 O   0  0  0  0  0  0  0  0  0  0  0  0
    1.1050   -0.0430    2.6020 C   0  0  0  0  0  0  0  0  0  0  0  0
   -0.1350   -3.7870    0.2030 H   0  0  0  0  0  0  0  0  0  0  0  0
   -1.0530   -2.2400    0.3940 H   0  0  0  0  0  0  0  0  0  0  0  0
    0.7520   -2.2480    0.4420 H   0  0  0  0  0  0  0  0  0  0  0  0
    3.7550   -1.2660   -1.4270 H   0  0  0  0  0  0  0  0  0  0  0  0
    2.3950   -2.3630   -1.1440 H   0  0  0  0  0  0  0  0  0  0  0  0
    3.3670    0.8610    0.1850 H   0  0  0  0  0  0  0  0  0  0  0  0
   -3.0360    0.4770   -1.3070 H   0  0  0  0  0  0  0  0  0  0  0  0
   -6.4300   -0.5600   -0.6070 H   0  0  0  0  0  0  0  0  0  0  0  0
   -4.8720   -1.0250   -1.3770 H   0  0  0  0  0  0  0  0  0  0  0  0
   -5.3000    0.7220   -1.1680 H   0  0  0  0  0  0  0  0  0  0  0  0
   -3.7660   -0.6420    2.7950 H   0  0  0  0  0  0  0  0  0  0  0  0
   -1.3550   -0.2990    3.3180 H   0  0  0  0  0  0  0  0  0  0  0  0
    2.1460    0.3080    2.4770 H   0  0  0  0  0  0  0  0  0  0  0  0
    1.0950   -1.1390    2.5450 H   0  0  0  0  0  0  0  0  0  0  0  0
    0.6840    0.3350    3.5330 H   0  0  0  0  0  0  0  0  0  0  0  0
  1  2  2  0  0  0  0
  2  3  1  0  0  0  0
  2  5  1  0  0  0  0
  3  4  1  0  0  0  0
  4 29  1  0  0  0  0
  4 30  1  0  0  0  0
  4 31  1  0  0  0  0
  5  6  2  0  0  0  0
  5 17  1  0  0  0  0
  6  7  1  0  0  0  0
  6 11  1  0  0  0  0
  7  8  1  0  0  0  0
  7 32  1  0  0  0  0
  7 33  1  0  0  0  0
  8  9  1  0  0  0  0
  8 10  1  0  0  0  0
 11 12  1  0  0  0  0
 11 34  1  0  0  0  0
 12 13  2  0  0  0  0
 12 16  1  0  0  0  0
 13 14  1  0  0  0  0
 14 15  2  0  0  0  0
 15 16  1  0  0  0  0
 16 17  1  0  0  0  0
 17 18  1  6  0  0  0
 17 19  1  0  0  0  0
 19 20  2  0  0  0  0
 19 26  1  0  0  0  0
 20 21  1  0  0  0  0
 20 35  1  0  0  0  0
 21 22  1  0  0  0  0
 21 24  2  0  0  0  0
 22 23  1  0  0  0  0
 23 36  1  0  0  0  0
 23 37  1  0  0  0  0
 23 38  1  0  0  0  0
 24 25  1  0  0  0  0
 24 39  1  0  0  0  0
 25 26  2  0  0  0  0
 25 40  1  0  0  0  0
 26 27  1  0  0  0  0
 27 28  1  0  0  0  0
 28 41  1  0  0  0  0
 28 42  1  0  0  0  0
 28 43  1  0  0  0  0
M  CHG  2   9  -1  10  -1
M  END
$$$$
RDZ12
 OpenBabel09302314563D

 39 41  0  0  1  0  0  0  0  0999 V2000
   -0.9860   -1.5600    2.0110 O   0  0  0  0  0  0  0  0  0  0  0  0
   -1.7040   -0.8340    1.3660 C   0  0  0  0  0  0  0  0  0  0  0  0
   -3.0650   -0.8950    1.4730 O   0  0  0  0  0  0  0  0  0  0  0  0
   -3.5600   -2.1540    1.9150 C   0  0  0  0  0  0  0  0  0  0  0  0
   -1.2770    0.3150    0.5620 C   0  0  0  0  0  0  0  0  0  0  0  0
   -1.9460    0.7250   -0.5550 C   0  0  0  0  0  0  0  0  0  0  0  0
   -3.0960    0.0820   -1.1920 C   0  0  0  0  0  0  0  0  0  0  0  0
   -2.7690   -1.4740   -1.5400 C   0  0  0  0  0  3  0  0  0  0  0  0
   -1.9750   -2.0110   -0.7730 O   0  5  0  0  0  0  0  0  0  0  0  0
   -3.3890   -1.8870   -2.5100 O   0  5  0  0  0  0  0  0  0  0  0  0
   -1.5310    1.9030   -1.2240 N   0  0  0  0  0  0  0  0  0  0  0  0
   -0.5670    2.6870   -0.6440 C   0  0  0  0  0  0  0  0  0  0  0  0
   -0.1380    3.9640   -0.9060 N   0  0  0  0  0  0  0  0  0  0  0  0
    0.7710    4.2550    0.0450 N   0  0  0  0  0  0  0  0  0  0  0  0
    0.9480    3.2760    0.8800 N   0  0  0  0  0  0  0  0  0  0  0  0
    0.1270    2.2560    0.4950 N   0  0  0  0  0  0  0  0  0  0  0  0
    0.0430    0.8790    1.0310 C   0  0  2  0  0  0  0  0  0  0  0  0
    0.0670    0.9330    2.1580 H   0  0  0  0  0  0  0  0  0  0  0  0
    1.2420    0.0900    0.5460 C   0  0  0  0  0  0  0  0  0  0  0  0
    1.0890   -1.0670   -0.2270 C   0  0  0  0  0  0  0  0  0  0  0  0
    2.2030   -1.7740   -0.6580 C   0  0  0  0  0  0  0  0  0  0  0  0
    3.4760   -1.3120   -0.2980 C   0  0  0  0  0  0  0  0  0  0  0  0
    4.4840   -2.0930   -0.7860 O   0  0  0  0  0  0  0  0  0  0  0  0
    5.8120   -1.6790   -0.5130 C   0  0  0  0  0  0  0  0  0  0  0  0
    3.6510   -0.1730    0.4850 C   0  0  0  0  0  0  0  0  0  0  0  0
    2.5180    0.5190    0.9090 C   0  0  0  0  0  0  0  0  0  0  0  0
   -4.6440   -2.0390    1.8410 H   0  0  0  0  0  0  0  0  0  0  0  0
   -3.2370   -2.3500    2.9400 H   0  0  0  0  0  0  0  0  0  0  0  0
   -3.1980   -2.9410    1.2350 H   0  0  0  0  0  0  0  0  0  0  0  0
   -3.4340    0.5470   -2.1290 H   0  0  0  0  0  0  0  0  0  0  0  0
   -3.9840    0.0190   -0.5430 H   0  0  0  0  0  0  0  0  0  0  0  0
   -1.9180    2.1700   -2.1200 H   0  0  0  0  0  0  0  0  0  0  0  0
    0.0790   -1.4390   -0.4880 H   0  0  0  0  0  0  0  0  0  0  0  0
    2.0910   -2.6730   -1.2580 H   0  0  0  0  0  0  0  0  0  0  0  0
    6.4100   -2.4420   -1.0250 H   0  0  0  0  0  0  0  0  0  0  0  0
    6.0110   -1.6950    0.5630 H   0  0  0  0  0  0  0  0  0  0  0  0
    6.0080   -0.6900   -0.9390 H   0  0  0  0  0  0  0  0  0  0  0  0
    4.6330    0.1790    0.7660 H   0  0  0  0  0  0  0  0  0  0  0  0
    2.6400    1.4120    1.5250 H   0  0  0  0  0  0  0  0  0  0  0  0
  1  2  2  0  0  0  0
  2  3  1  0  0  0  0
  2  5  1  0  0  0  0
  3  4  1  0  0  0  0
  4 27  1  0  0  0  0
  4 28  1  0  0  0  0
  4 29  1  0  0  0  0
  5  6  2  0  0  0  0
  5 17  1  0  0  0  0
  6  7  1  0  0  0  0
  6 11  1  0  0  0  0
  7  8  1  0  0  0  0
  7 30  1  0  0  0  0
  7 31  1  0  0  0  0
  8  9  1  0  0  0  0
  8 10  1  0  0  0  0
 11 12  1  0  0  0  0
 11 32  1  0  0  0  0
 12 13  2  0  0  0  0
 12 16  1  0  0  0  0
 13 14  1  0  0  0  0
 14 15  2  0  0  0  0
 15 16  1  0  0  0  0
 16 17  1  0  0  0  0
 17 18  1  1  0  0  0
 17 19  1  0  0  0  0
 19 20  2  0  0  0  0
 19 26  1  0  0  0  0
 20 21  1  0  0  0  0
 20 33  1  0  0  0  0
 21 22  2  0  0  0  0
 21 34  1  0  0  0  0
 22 23  1  0  0  0  0
 22 25  1  0  0  0  0
 23 24  1  0  0  0  0
 24 35  1  0  0  0  0
 24 36  1  0  0  0  0
 24 37  1  0  0  0  0
 25 26  2  0  0  0  0
 25 38  1  0  0  0  0
 26 39  1  0  0  0  0
M  CHG  2   9  -1  10  -1
M  END
$$$$
RDZ13
 OpenBabel09302314563D

 47 49  0  0  1  0  0  0  0  0999 V2000
   -0.0600   -2.7310   -0.0860 O   0  0  0  0  0  0  0  0  0  0  0  0
   -0.8550   -2.0450    0.5050 C   0  0  0  0  0  0  0  0  0  0  0  0
   -1.5680   -2.6930    1.4750 O   0  0  0  0  0  0  0  0  0  0  0  0
   -2.6130   -1.9920    2.1340 C   0  0  0  0  0  0  0  0  0  0  0  0
   -1.0960   -0.6100    0.2990 C   0  0  0  0  0  0  0  0  0  0  0  0
   -2.1280   -0.1720   -0.4750 C   0  0  0  0  0  0  0  0  0  0  0  0
   -3.1200   -1.0590   -1.1180 C   0  0  0  0  0  0  0  0  0  0  0  0
   -4.5980   -0.6230   -0.6920 C   0  0  0  0  0  3  0  0  0  0  0  0
   -4.8240    0.5840   -0.8780 O   0  5  0  0  0  0  0  0  0  0  0  0
   -5.3060   -1.5130   -0.2480 O   0  5  0  0  0  0  0  0  0  0  0  0
   -2.3330    1.1930   -0.7400 N   0  0  0  0  0  0  0  0  0  0  0  0
   -1.5200    2.0900   -0.0960 C   0  0  0  0  0  0  0  0  0  0  0  0
   -1.4670    3.4600   -0.1210 N   0  0  0  0  0  0  0  0  0  0  0  0
   -0.4470    3.8160    0.6850 N   0  0  0  0  0  0  0  0  0  0  0  0
    0.1530    2.7940    1.2110 N   0  0  0  0  0  0  0  0  0  0  0  0
   -0.5000    1.6710    0.7820 N   0  0  0  0  0  0  0  0  0  0  0  0
   -0.0540    0.2710    0.9400 C   0  0  2  0  0  0  0  0  0  0  0  0
   -0.0080    0.0620    2.0510 H   0  0  0  0  0  0  0  0  0  0  0  0
    1.2940    0.0760    0.3090 C   0  0  0  0  0  0  0  0  0  0  0  0
    1.4490    0.1150   -1.0970 C   0  0  0  0  0  0  0  0  0  0  0  0
    0.3140    0.4550   -1.7410 O   0  0  0  0  0  0  0  0  0  0  0  0
    0.3220    0.4220   -3.1630 C   0  0  0  0  0  0  0  0  0  0  0  0
    2.6710   -0.1380   -1.7160 C   0  0  0  0  0  0  0  0  0  0  0  0
    3.7700   -0.4350   -0.8980 C   0  0  0  0  0  0  0  0  0  0  0  0
    4.9050   -0.6760   -1.6080 O   0  0  0  0  0  0  0  0  0  0  0  0
    6.0530   -1.0720   -0.8710 C   0  0  0  0  0  0  0  0  0  0  0  0
    3.6820   -0.4500    0.4920 C   0  0  0  0  0  0  0  0  0  0  0  0
    2.4330   -0.1910    1.0630 C   0  0  0  0  0  0  0  0  0  0  0  0
    2.3370   -0.3010    2.4320 O   0  0  0  0  0  0  0  0  0  0  0  0
    2.4850    0.9590    3.0840 C   0  0  0  0  0  0  0  0  0  0  0  0
   -3.4600   -1.8470    1.4440 H   0  0  0  0  0  0  0  0  0  0  0  0
   -2.2670   -1.0390    2.5400 H   0  0  0  0  0  0  0  0  0  0  0  0
   -2.8960   -2.6810    2.9360 H   0  0  0  0  0  0  0  0  0  0  0  0
   -2.9790   -2.1240   -0.8670 H   0  0  0  0  0  0  0  0  0  0  0  0
   -3.0960   -0.9890   -2.2180 H   0  0  0  0  0  0  0  0  0  0  0  0
   -3.3190    1.4880   -1.0340 H   0  0  0  0  0  0  0  0  0  0  0  0
   -0.7170    0.7020   -3.3940 H   0  0  0  0  0  0  0  0  0  0  0  0
    0.5410   -0.5870   -3.5270 H   0  0  0  0  0  0  0  0  0  0  0  0
    1.0190    1.1590   -3.5690 H   0  0  0  0  0  0  0  0  0  0  0  0
    2.7850   -0.1250   -2.7910 H   0  0  0  0  0  0  0  0  0  0  0  0
    6.7910   -1.2520   -1.6630 H   0  0  0  0  0  0  0  0  0  0  0  0
    5.8580   -1.9930   -0.3110 H   0  0  0  0  0  0  0  0  0  0  0  0
    6.3860   -0.2670   -0.2100 H   0  0  0  0  0  0  0  0  0  0  0  0
    4.5240   -0.6680    1.1300 H   0  0  0  0  0  0  0  0  0  0  0  0
    2.2600    0.7180    4.1280 H   0  0  0  0  0  0  0  0  0  0  0  0
    1.7740    1.7000    2.6930 H   0  0  0  0  0  0  0  0  0  0  0  0
    3.5120    1.3180    2.9740 H   0  0  0  0  0  0  0  0  0  0  0  0
  1  2  2  0  0  0  0
  2  3  1  0  0  0  0
  2  5  1  0  0  0  0
  3  4  1  0  0  0  0
  4 31  1  0  0  0  0
  4 32  1  0  0  0  0
  4 33  1  0  0  0  0
  5  6  2  0  0  0  0
  5 17  1  0  0  0  0
  6  7  1  0  0  0  0
  6 11  1  0  0  0  0
  7  8  1  0  0  0  0
  7 34  1  0  0  0  0
  7 35  1  0  0  0  0
  8  9  1  0  0  0  0
  8 10  1  0  0  0  0
 11 12  1  0  0  0  0
 11 36  1  0  0  0  0
 12 13  2  0  0  0  0
 12 16  1  0  0  0  0
 13 14  1  0  0  0  0
 14 15  2  0  0  0  0
 15 16  1  0  0  0  0
 16 17  1  0  0  0  0
 17 18  1  1  0  0  0
 17 19  1  0  0  0  0
 19 20  2  0  0  0  0
 19 28  1  0  0  0  0
 20 21  1  0  0  0  0
 20 23  1  0  0  0  0
 21 22  1  0  0  0  0
 22 37  1  0  0  0  0
 22 38  1  0  0  0  0
 22 39  1  0  0  0  0
 23 24  2  0  0  0  0
 23 40  1  0  0  0  0
 24 25  1  0  0  0  0
 24 27  1  0  0  0  0
 25 26  1  0  0  0  0
 26 41  1  0  0  0  0
 26 42  1  0  0  0  0
 26 43  1  0  0  0  0
 27 28  2  0  0  0  0
 27 44  1  0  0  0  0
 28 29  1  0  0  0  0
 29 30  1  0  0  0  0
 30 45  1  0  0  0  0
 30 46  1  0  0  0  0
 30 47  1  0  0  0  0
M  CHG  2   9  -1  10  -1
M  END
$$$$
RDZ14
 OpenBabel09302314563D

 47 49  0  0  1  0  0  0  0  0999 V2000
    2.2350    0.9730   -3.3530 O   0  0  0  0  0  0  0  0  0  0  0  0
    1.8560    0.1860   -2.5160 C   0  0  0  0  0  0  0  0  0  0  0  0
    1.4590   -1.0160   -3.0100 O   0  0  0  0  0  0  0  0  0  0  0  0
    0.7540   -1.9430   -2.1970 C   0  0  0  0  0  0  0  0  0  0  0  0
    1.8190    0.4860   -1.0810 C   0  0  0  0  0  0  0  0  0  0  0  0
    2.6160   -0.1280   -0.1600 C   0  0  0  0  0  0  0  0  0  0  0  0
    3.2940   -1.4290   -0.3270 C   0  0  0  0  0  0  0  0  0  0  0  0
    2.5110   -2.4350    0.6370 C   0  0  0  0  0  3  0  0  0  0  0  0
    2.3270   -1.9680    1.7760 O   0  5  0  0  0  0  0  0  0  0  0  0
    2.1550   -3.4950    0.1480 O   0  5  0  0  0  0  0  0  0  0  0  0
    2.8320    0.4180    1.1210 N   0  0  0  0  0  0  0  0  0  0  0  0
    2.2340    1.6300    1.4010 C   0  0  0  0  0  0  0  0  0  0  0  0
    2.4060    2.5240    2.4200 N   0  0  0  0  0  0  0  0  0  0  0  0
    1.6500    3.6000    2.1150 N   0  0  0  0  0  0  0  0  0  0  0  0
    1.0200    3.4640    0.9890 N   0  0  0  0  0  0  0  0  0  0  0  0
    1.3410    2.2350    0.4960 N   0  0  0  0  0  0  0  0  0  0  0  0
    0.8380    1.5690   -0.7140 C   0  0  2  0  0  0  0  0  0  0  0  0
    0.7370    2.3290   -1.5400 H   0  0  0  0  0  0  0  0  0  0  0  0
[truncated: 711,299 more chars]
